# Supplementary material for: Regulation of different phases of AMPA receptor intracellular transport by 4.1N and SAP97
Source: eLife journal article supplement (doi:10.7554/elife.85609), 2023-04-06
Supplement: fig1-data1 [file Figure 1.xlsx]

## Sheet: Blots
Fig. 1A		Scr	Sh10	Scr	Sh SAP97
		100	45.2	100	68.8
		100	25.8	100	29.4
		100	86.4	100	27.9
		100	39.65	100	62.2
		100	24.75
Fig. 1B		SCR	Sh4.N	Rescue SCR	Rescue Sh4,1N
		1	0.257	1.11	2.34
		1	0.1485	1.125	1.22
		1	0.249	0.8255	1.0185
		1	0.395	1.174	1.07
		SCR	Sh SAP97	Rescue SCR	Rescue Sh
		1	0.423	0.586	0.535
		1	0.598	0.954	0.953
		1	0.89	1.07	1.302
		1	0.145

## Sheet: IT
Fig 1C		Scr 4.1	Sh 4.1	Scr SAP	Sh SAP		Fig 2F/2G	+scr4.1	Scr4.1 Moove	Scr4.1 PAUSE	+sh4.1N	Sh4.1 Moove	Sh4.1 PAUSE	+scr SAP	Scr SAP Moove	ScrSAP PAUSE
		48.8616	1.46003	0.582307	9.86481			1	1	0		0.213	0.786		0.514	0.486
		9.60112	4.36672	9.87587	5.26201				1	0		0.914	0.086		1	0
		5.9671	3.04838	28.4361	0.585599				1	0		0.611	0.389		0	1
		7.63606	17.1051	43.8775	4.78098				1	0		1	0
		5.22816	6.20732	13.3002	6.52392				1	0		1	0		1	0
		3.59411	1.73146	47.2773	2.87468				1	0					1	0
		43.7882	26.3929	17.1271	1.67008				0.402	0.598		1	0		1	0
		10.4222		24.7785	2.62116				0.455	0.545		1	0		1	0
		12.1177		8.16237	0.602288				1	0		1	0		0.753	0.247
		37.5574		49.4163	1.79621				1	0		1	0		1	0
		2.14219		18.8145	3.69429				1	0		0.109	0.891		0.421	0.579
				30.3596	4.27901				1	0		0.135	0.866		0.321	0.679
				17.2869	3.04469				1	0		0.284	0.716		1	0
		19.4325	8.8445	8.36547					0.555	0.444		1	0		0.724	0.276
		31.7052	28.6415	40.4016					1	0		0.245	0.755		1	0
		32.1882	25.7167	43.6276					1	0		0	1		0.419	0.58
		38.2199	11.7269	7.39934					0.903	0.097		0	1		0.496	0.504
		14.8581	18.1326						1	0		0.033	0.967		0.929	0.071
		14.7659	3.65609		0.897101				1	0		0.611	0.389		1	0
		60.1507		2.89639	2.76712				1	0					0.722	0.278
				34.2856	1.83419				0.833	0.167		0.072	0.928		1	0
				5.64346	1.17181				1	0		0.396	0.604		0.176	0.824
		1.74348	3.21123	45.6663	3.63991				0.972	0.027		0.284	0.716		0.6	0.4
		4.03271	0.151217	12.7193	0.783177				1	0		1	0		0.383	0.616
		17.4585	4.11987	5.53129	1.80845				1	0		1	0		1	0
		8.64889	7.83558	12.1002	5.31145				0.512	0.488		1	0		0.87	0.13
		2.72863	6.33322	4.69797	1.49293				1	0		1	0		0.883	0.117
		4.69537	3.46175	3.37456	1.72355				1	0		0.941	0.059		0.728	0.272
		10.9612	8.78172	33.2326	15.4971				1	0		1	0		0.28	0.72
		15.5486	6.16214	6.90471	0.447072				1	0		1	0		0.857	0.143
		11.1528	11.6036		8.47137				0.905	0.095					0.716	0.284
		10.2205	6.25386						1	0		1	0		1	0
		25.1928							1	0		0.785	0.215		1	0
		15.5527		5.28339					0.667	0.333		1	0		0	1
		6.07987		8.8181	4.96888				0.714	0.286		1	0		0.742	0.258
				1.46267	8.33107				1	0		0.447	0.553		1	0
				10.1702	2.73954				0	1		1	0		1	0
				9.26197	12.7128				1	0		0.328	0.673		1	0
				14.7071	7.97634				1	0		1	0		0.922	0.078
				36.5557					1	0		0.872	0.128		1	0
				13.7069					0.978	0.022		0.7	0.3		0.703	0.296
				43.3726					1	0		0.705	0.295		0.275	0.725
									1	0		0.413	0.587		0.59	0.41
									1	0		1	0		1	0
Fig 2E		Scr 4.1	Sh 4.1	Scr SAP	Sh SAP				1	0		0.933	0.067		1	0
		1.9201	1.6514		1.20027				0.935	0.065		0.18	0.82		0.483	0.517
		0.6189	2.635	1.70421	1.98771				1	0		1	0		1	0
		1.22725	1.75205	2.1266	1.15525				1	0		1	0		0.591	0.408
		1.78917	1.66241	1.47805	0.783333				0.797	0.203		1	0		1	0
		0.794375	1.09583	1.1507	1.05193				0.815	0.185		0.362	0.638		0.084	0.916
		1.014	0.988143	1.73732	1.676				0.889	0.111		1	0		0.105	0.895
		2.20575	1.2668	1.7419	0.74025				1	0		1	0		0	1
		1.19859		1.37229	1.3358				1	0		1	0		1	0
		1.07396		1.40618	0.907667				0.286	0.714		0.45	0.55		1	0
		2.36481		2.27775	1.14325				0.273	0.727		0.586	0.414		1	0
		1.0214		1.9521	0.877222				1	0		1	0		0.625	0.375
				1.93895	1.51662				1	0		0.546	0.455		0	1
		2.26995	1.58554	1.56503	1.27022				1	0		1	0		0.628	0.372
		2.60575	1.41355	1.34997					0	1		1	0		0.632	0.368
		2.27879	1.69579	1.86323					1	0		0.951	0.049		0	1
		2.31258	1.27167	2.13811					1	0		1	0		1	0
		1.89653	0.928842	1.24604					1	0		1	0		1	0
		1.03895	1.81						1	0		0.878	0.122		1	0
		2.36404		1.08231	0.126				0	1		1	0		1	0
				1.71519	0.566				1	0		0.621	0.379		0.857	0.143
				1.16329	0.6106				1	0		0.305	0.695		1	0
		0.32975	1.49833	1.59716	1.07075				1	0		1	0		1	0
		0.869833		1.15704	1.26314				0	1		0.671	0.328		1	0
		1.16039	0.972286	1.00627	0.731				1	0		0.293	0.707		0.735	0.265
		1.2823	1.1215	1.64504	1.0015				0.364	0.636		0.601	0.398		1	0
		1.99867	1.0178	0.848133	1.08691				1	0		0.416	0.584		1	0
		2.22313	0.701455	0.85375	1.995				1	0		0.533	0.468		1	0
		1.58211	1.235	1.56899	0.532				1	0		1	0		1	0
		0.949091	0.983045	1.00338	1.0884				0.772	0.227		1	0		0.391	0.609
		1.102	1.07495		1.038				1	0		1	0
		1.56083	1.334		0.697821				1	0		1	0		1	0
		1.34827							1	0		1	0		0.222	0.778
		1.3734		1.37043					1	0		0	1		1	0
		0.9628		1.6925	1.1764				1	0		1	0		1	0
				1.8345	1.78105				1	0		1	0		1	0
				2.18015	2.1362				0.727	0.273		1	0		0.477	0.523
				1.45507	1.1988				1	0		0.043	0.957		1	0
				2.03133	1.19785				0.881	0.119		1	0		0.548	0.452
		2.02509	1.71384	2.25293					0.462	0.538		0.344	0.656		1	0
		1.42492	1.1105	1.44037					0.271	0.729		1	0		1	0
		0.993077	1.05591	1.82807					0.538	0.462		1	0		0.722	0.278
		2.45754	1.48186						1	0		1	0		1	0
		1.28537	1.78017						1	0		1	0		0.111	0.889
		1.19833	1.0132	1.057	1.31113				1	0		0.758	0.242		0.95	0.05
		2.15404	1.14233	1.79937	1.56737				1	0		1	0		0.6	0.4
		1.32029		2.06464	0.631667				1	0		1	0		1	0
		1.30455		1.8277	1.15427				1	0		0.811	0.189		1	0
		2.58271		1.57503	1.78643				1	0		0.105	0.895		1	0
		0.959		1.8768	1.07567				0.3	0.7		1	0		1	0
				1.64211	1.83				0.264	0.737		0	1		1	0
		2.12506	1.75993	1.77573	1.79073				1	0		1	0		0.245	0.756
		2.47792	1.66228	1.34491	0.412667				0.364	0.636		1	0		1	0
		2.05644	1.69833	2.51433	1.15133				1	0		1	0		0.559	0.441
		2.63782	1.67591	1.81434	1.10371				1	0		1	0		1	0
		1.71003	1.42786	2.11848	1.94155				1	0		0.518	0.481		0.98	0.02
		1.34951	1.76077	1.92247	1.44917				1	0		0.662	0.338		1	0
		2.6849		1.244					0.923	0.077		0.065	0.935		1	0
				1.97927					0.643	0.357		1	0		1	0
				2.54962					1	0		1	0		1	0
		0.88425	1.08625	1.30068					0.167	0.833		1	0		0.256	0.744
		1.61391	0.992						1	0		1	0		0.45	0.55
		1.29298	0.832111	0.956706	3.17				1	0		1	0		1	0
		1.40605	1.71125	1.75705	0.677				0.232	0.768		1	0		0.648	0.351
		1.4625	1.587	1.02917	1.208				0.786	0.214		1	0		1	0
		1.299	0.947	1.78446	0.6828				1	0		1	0		1	0
		1.61123	1.23355	1.21776	1.4148				1	0		1	0		0.455	0.545
		1.44427	1.31694	0.7276	0.723				1	0		1	0		1	0
		1.04433	1.32906	1.54493	0.940333				1	0		0	1		0.077	0.924
		1.15183	0.808615	0.867842	1.0836				1	0		0.083	0.917		1	0
		1.54663		1.01682	0.6285				1	0		0	1		1	0
		1.70232		1.55973	0.51				0.438	0.562		0.1	0.9		0	1
		1.03046		0.985688	1.17702				0.849	0.151		1	0		1	0
					1.626				1	0		1	0		0.143	0.857
					0.856125				1	0		1	0		0	1
									1	0		1	0		0	1
									1	0		1	0		0	1
				1.317					1	0		1	0		1	0
				1.78435	1.62811				1	0		1	0		1	0
				1.099	1.66306				0.956	0.043		1	0		1	0
				2.04011	1.20775				1	0		0	1		1	0
				1.644	2.23104				1	0		0.3	0.7		1	0
				2.0579	1.18093				0	1		1	0		1	0
				2.75322					0.295	0.705		1	0		1	0
				1.26596					0.338	0.662		1	0		1	0
				2.36913					0.093	0.907		1	0		1	0
									1	0		1	0		1	0
									1	0					1	0
									1	0		0.853	0.147		1	0
									1	0		1	0		0	1
									0.08	0.92		1	0		1	0
									0	1		0.901	0.099		0.829	0.171
									1	0		1	0		1	0
									1	0		0	1		1	0
									1	0		0.933	0.067		0.5	0.5
									0.886	0.113		1	0		0.636	0.364
									1	0		0	1		1	0
									1	0		1	0		1	0
									1	0		1	0		0.858	0.143
									1	0		1	0		1	0
									1	0		0.653	0.347		1	0
									1	0		0.878	0.122		0.37	0.63
									1	0		1	0		0	1
									0.359	0.64		1	0		1	0
									1	0		1	0		1	0
									0.238	0.762		0.192	0.808		1	0
									1	0		1	0		1	0
									1	0		1	0		1	0
									1	0		0	1		1	0
									1	0		1	0		1	0
									1	0		0.543	0.457		0.146	0.854
									0.312	0.688		0.13	0.87		1	0
									0	1		0	1		0.5	0.5
									0.283	0.716		0.369	0.631		1	0
									1	0		0.208	0.792		0.893	0.107
									1	0		1	0		1	0
									1	0		0	1		1	0
									0.834	0.167		0.436	0.563		0	1
									1	0		0	1		1	0
									0.324	0.676		1	0		1	0
									1	0		0	1		1	0
									0.539	0.461		0	1		1	0
									0	1					1	0
									1	0		1	0		1	0
									1	0		0	1		1	0
									1	0		0.147	0.854		1	0
									0.592	0.407					1	0
									1	0		1	0		0.081	0.919
									1	0		1	0		0.857	0.143
									1	0		1	0		1	0
									0.583	0.417		1	0		1	0
									0.033	0.967		1	0		0	1
									1	0		0.68	0.32		0.925	0.075
									1	0		1	0		1	0
									1	0		0.6	0.4		0.654	0.347
									1	0		0.93	0.07		0.919	0.081
									1	0		0.329	0.671		1	0
									0.261	0.739		1	0		0.167	0.833
									0	1		1	0		0.8	0.2
									1	0		1	0		1	0
									1	0		1	0		0.562	0.438
									1	0		1	0		1	0
												0.605	0.394		1	0
									0.146	0.854		1	0		1	0
									0.889	0.11		1	0		1	0
									0.816	0.184		0.5	0.5		0.855	0.145
									1	0		1	0		0.305	0.695
									1	0		0.226	0.774		1	0
									1	0		1	0		1	0
									0.409	0.591		1	0		1	0
									0	1		0.25	0.75		1	0
									1	0		0.826	0.174		1	0
									1	0		1	0		1	0
									0.09	0.91		0.583	0.417		0.823	0.176
									0.255	0.745		1	0		0.561	0.438
									1	0		0.552	0.448		1	0
									1	0		1	0		0	1
									0	1		0.5	0.5		1	0
									1	0		0.129	0.871		1	0
									0.381	0.619		1	0		0	1
									0	1		1	0		0.366	0.634
									0.331	0.669		0.304	0.696		0.331	0.669
									1	0		0.76	0.24		1	0
									1	0		0.769	0.231		1	0
												0.329	0.672		1	0
								2	0.818	0.182		1	0		1	0
									0.902	0.098		0.326	0.674		1	0
									0.082	0.918		0.805	0.195		0.857	0.143
									0.469	0.53		1	0		1	0
									0.051	0.949		0.222	0.778		1	0
									1	0		0	1		1	0
									1	0		0.636	0.364		1	0
									0.316	0.684		0.302	0.698		1	0
									0.867	0.133		0.907	0.093		1	0
									0.36	0.64		1	0		0.724	0.276
									0.375	0.625		1	0		0.308	0.692
									1	0		1	0		0.556	0.444
									0.228	0.772		0.618	0.382		1	0
									0.32	0.68		1	0		1	0
									0	1		1	0		1	0
									0	1		1	0		1	0
									0.8	0.2		1	0		0.222	0.778
									0.422	0.578		0.8	0.2		1	0
									0.159	0.841		1	0		0	1
									0.119	0.881		1	0		1	0
									0	1		0.931	0.069		0.176	0.824
									0	1		1	0		1	0
									0.571	0.429		1	0		0.5	0.5
									1	0		1	0		1	0
									1	0		0	1		1	0
												1	0		0.176	0.824
								3	1	0		0.167	0.833		1	0
									1	0		0.308	0.692		1	0
									1	0		1	0		1	0
									1	0		1	0		0.6	0.4
									1	0		1	0		1	0
									0.279	0.722		1	0		1	0
									1	0		1	0		0.061	0.939
									1	0		0	1		0.13	0.87
									1	0		0	1		1	0
									1	0		0.478	0.522		1	0
									0.921	0.078		1	0		1	0
									1	0		0.578	0.422		1	0
									1	0		1	0		1	0
									1	0		1	0		1	0
									1	0		1	0		1	0
												0.556	0.444		1	0
								4	1	0		0	1		1	0
									1	0		1	0		1	0
									0.382	0.618		0.736	0.264		1	0
									0.762	0.238		0.474	0.526		1	0
									1	0		1	0		1	0
									0.743	0.257		1	0		0	1
									0.873	0.127		1	0		0.618	0.382
									0.041	0.959					1	0
									1	0
									1	0					1	0
									1	0					1	0
									1	0					0.939	0.06
									0.174	0.826					0.898	0.102
									0.083	0.917					0.294	0.706
									0	1					0.667	0.333
									1	0					0.903	0.097
									1	0					0.882	0.118
									0.035	0.965					1	0
									0	1					0.966	0.034
									0.145	0.855					1	0
									0	1					1	0
									1	0					1	0
									0.358	0.642					1	0
															1	0
								5	0.513	0.487					0.597	0.404
									1	0					0.659	0.341
									0.911	0.089					0.396	0.604
									1	0					0.842	0.158
									0.174	0.826					0.909	0.091
									1	0					1	0
									1	0					1	0
									1	0					1	0
									0.377	0.623					1	0
									0.638	0.362					1	0
									0.19	0.81					0.289	0.711
									0.306	0.694					1	0
															1	0
								6	1	0					1	0
									1	0					1	0
									1	0					1	0
									0.366	0.634					1	0
									0.361	0.639					0.722	0.278
									0.432	0.567					1	0
									1	0					0.296	0.703
									1	0					1	0
									1	0					1	0
									1	0					1	0
									0.892	0.109					0.565	0.435
									1	0					0.878	0.122
									0.548	0.452					1	0
									1	0					1	0
									0.889	0.111					0.708	0.292
									1	0					1	0
									1	0					0.282	0.718
									0.704	0.296					0.869	0.13
									0.28	0.721					0.714	0.286
									1	0					0.422	0.578
									1	0					1	0
									0.467	0.533					1	0
									0.854	0.146					1	0
									1	0					1	0
									1	0					1	0
									1	0					1	0
									1	0					1	0
									0.222	0.778					1	0
									1	0					1	0
									0.887	0.113					1	0
									1	0					1	0
									0.459	0.542					1	0
									0.455	0.545					1	0
									0.457	0.543					0.912	0.088
									1	0					1	0
									0.312	0.688					0.29	0.71
									1	0					0.154	0.846
									0.842	0.158					1	0
									0.171	0.829					1	0
									0.765	0.235					1	0
									0.824	0.176					1	0
									0.769	0.231					1	0
									1	0					0.741	0.259
									1	0					1	0
									1	0					1	0
									1	0					1	0
									1	0					0.596	0.404
									0.687	0.312					1	0
									1	0					1	0
									1	0					0	1
									1	0					1	0
									1	0					0.83	0.17
									1	0					0	1
									0.684	0.316					1	0
									1	0					1	0
									0.667	0.333					0	1
									1	0					1	0
									1	0					1	0
									1	0					1	0
									1	0					1	0
									0.188	0.812					1	0
									1	0					1	0
									1	0					1	0
									1	0					1	0
									1	0					0.961	0.039
									1	0					1	0
									1	0					1	0
									1	0					1	0
									1	0					1	0
									1	0					0.118	0.882
									1	0					1	0
									1	0					1	0
									1	0					1	0
									0.583	0.417					1	0
									1	0					0.491	0.509
									1	0					1	0
									1	0					1	0
									0.711	0.289					0.108	0.892
									1	0					1	0
									1	0					1	0
									1	0					0.708	0.292
									1	0					1	0
									1	0					1	0
									1	0					1	0
									1	0					1	0
									1	0					0.347	0.652
									0.723	0.278					1	0
									1	0					0.429	0.571
									1	0					0	1
									0.236	0.765					0	1
									1	0					0.5	0.5
									1	0					1	0
									1	0					1	0
									1	0					0.929	0.071
									0.386	0.614					1	0
									1	0					1	0
									1	0					1	0
									1	0					1	0
									1	0					0.444	0.556
									1	0					0	1
									1	0					0.868	0.132
									1	0					1	0
									1	0					1	0
									1	0					1	0
									0.148	0.852					1	0
									1	0					0.843	0.156
									1	0					1	0
									1	0					1	0
									1	0					1	0
									1	0					1	0
									0.619	0.381					1	0
									1	0					1	0
									0	1					1	0
									0.231	0.769					1	0
									1	0					0.636	0.364
									0.441	0.559					1	0
									1	0					0.643	0.357
									1	0					1	0
									0.319	0.681					0	1
									0.463	0.537					1	0
									1	0					1	0
									1	0					1	0
									1	0					1	0
									0.633	0.367					1	0
									1	0					1	0
									1	0					0.453	0.547
									0.036	0.964					0.528	0.472
									0	1					1	0
									0.433	0.567					1	0
									1	0					1	0
									0.621	0.379					1	0
									1	0					0.667	0.333
									1	0					1	0
									1	0					0.5	0.5
									1	0					0.304	0.696
									1	0					0.6	0.4
									1	0					0.16	0.84
									0.256	0.744					1	0
									0.234	0.765					0.837	0.163
									0.269	0.731					1	0
									0.5	0.5					1	0
									1	0					1	0
									1	0					1	0
									0	1					0	1
									0	1					0	1
									1	0					0	1
									1	0					1	0
									1	0					0.064	0.936
									1	0					1	0
									1	0					1	0
									0.111	0.889					0.147	0.853
									1	0					1	0
									1	0					0	1
									1	0					1	0
									0.455	0.545					1	0
									0.227	0.773					1	0
									1	0					1	0
									0.331	0.669					1	0
									0.575	0.424					0	1
									1	0					0	1
									1	0					1	0
									1	0					1	0
									0.381	0.619					0	1
									1	0					0.471	0.529
									1	0					1	0
									0.143	0.857					0.516	0.485
									1	0					0.214	0.786
									1	0					1	0
									1	0					1	0
									1	0					1	0
									0.731	0.269					1	0
									1	0					1	0
									1	0					1	0
															0.9	0.1
								7	1	0					0.475	0.525
									0.608	0.392					1	0
									0.858	0.142					1	0
									0.785	0.215					1	0
									0.048	0.951					1	0
									0.548	0.452					1	0
									0	1					1	0
									1	0					1	0
									1	0					0.185	0.815
									0.45	0.55					0	1
									0	1					0.667	0.333
									1	0					0.667	0.333
									0	1					1	0
									0.424	0.576					1	0
									0.343	0.657					1	0
									0.36	0.64					0.545	0.455
									0.63	0.37					0	1
									0	1					1	0
									0	1					1	0
									1	0					0	1
									0	1					1	0
									0	1					1	0
									1	0					0.148	0.852
									0.076	0.924					1	0
									1	0					1	0
									1	0					0	1
									0	1					1	0
									0.407	0.593					0.739	0.261
									0.25	0.75					1	0
									0.163	0.837					0.214	0.786
									0.229	0.771					0.364	0.636
									1	0
									0.333	0.667					1	0
															0.673	0.327
								8	0.778	0.222					1	0
									1	0					1	0
									1	0					0.529	0.471
									0.829	0.171					0.831	0.169
									0.296	0.704					0.568	0.432
									0.228	0.773					1	0
									1	0					1	0
									1	0					0.944	0.055
									1	0					1	0
									0.585	0.415					0.688	0.312
									0.434	0.566					0.225	0.775
									0.5	0.5					1	0
									0.675	0.324					1	0
									1	0					0.954	0.047
									1	0					0.301	0.699
									1	0					1	0
									0.389	0.611					1	0
									0	1					1	0
									1	0					0.704	0.296
									1	0					1	0
									0.136	0.864					0.204	0.796
									1	0					1	0
									0	1					1	0
									0.157	0.843					1	0
									0.151	0.849					0.537	0.463
									0.375	0.625					1	0
									0.068	0.932					0.48	0.52
									1	0					1	0
									0.155	0.845					1	0
									0	1					0.093	0.908
									0	1					1	0
									0.243	0.757					1	0
									0	1					0	1
									0	1					1	0
									0	1					1	0
									1	0					1	0
															1	0
								9	0.938	0.062					1	0
									0.935	0.065					1	0
									1	0					0	1
									0.391	0.609					0.208	0.792
									0.902	0.098					1	0
									0.863	0.137					1	0
									1	0					0	1
									1	0					0.909	0.091
									0.821	0.179					0.406	0.594
									1	0					1	0
									1	0					1	0
									1	0					0.514	0.486
									1	0					1	0
									0.56	0.44					1	0
									1	0					0.66	0.34
									1	0					1	0
									1	0					0	1
									1	0					0.393	0.607
									1	0					0	1
									1	0					1	0
									1	0					0.261	0.739
									1	0					1	0
									1	0					0.437	0.563
									1	0					0.875	0.125
									0.875	0.125					1	0
									1	0					0.848	0.152
									1	0					1	0
									1	0					0.303	0.697
									0.77	0.231					0	1
									1	0					0.203	0.798
									0.414	0.586					0	1
									1	0					1	0
									0.768	0.232					1	0
									1	0					1	0
									1	0					1	0
									1	0					1	0
									1	0					1	0
									1	0					1	0
									1	0					1	0
									1	0					0.324	0.676
									1	0					1	0
									1	0					0.816	0.184
									1	0					1	0
									1	0					0	1
									0.15	0.85					0.405	0.595
									0.187	0.813					1	0
									1	0					1	0
									1	0					0	1
									1	0					0.818	0.182
									1	0					1	0
									0.295	0.705					1	0
									0.643	0.357					1	0
									1	0					0.226	0.774
									1	0					0.65	0.35
									0.125	0.875					1	0
									0.737	0.263					1	0
									1	0					1	0
									1	0					1	0
									1	0					0.131	0.869
									1	0					1	0
									0.346	0.654					1	0
									1	0					1	0
									1	0					1	0
									1	0					1	0
									1	0
									1	0					0.149	0.851
									0.373	0.627					1	0
									1	0					1	0
									1	0					1	0
									1	0					1	0
									0.833	0.167					0.865	0.135
									1	0					0.556	0.444
									0.417	0.583					0.03	0.97
									1	0					0.155	0.845
									1	0					1	0
									1	0					0.455	0.545
									1	0					0.305	0.695
									1	0					1	0
									1	0					1	0
									1	0					1	0
									1	0					1	0
									1	0					1	0
									1	0					0.667	0.333
									1	0					1	0
									1	0					0.528	0.471
									0.843	0.157					1	0
									0.268	0.732					1	0
									0.75	0.25					1	0
									1	0					0.606	0.394
									1	0					0.883	0.117
									1	0					1	0
									1	0					0.938	0.062
									1	0					1	0
									0.625	0.375					1	0
									1	0					0.4	0.6
									1	0					0.289	0.711
									1	0					0.124	0.876
									1	0					1	0
									1	0					1	0
									0.547	0.453					1	0
									1	0					0.778	0.222
									0.65	0.35					1	0
									1	0					1	0
									1	0					1	0
									1	0					0.314	0.686
									1	0					0.721	0.279
									1	0					0.852	0.148
									0.625	0.375					0	1
									1	0					0.922	0.078
									1	0					1	0
									1	0					0.443	0.557
									1	0					1	0
									1	0					0.956	0.044
									1	0					1	0
									1	0					0.843	0.157
									0.274	0.726					1	0
									1	0					0.946	0.054
									1	0					1	0
									1	0					1	0
									1	0					0.174	0.826
									0.624	0.377					0.043	0.957
									1	0					1	0
									1	0					0.965	0.035
									1	0					1	0
									1	0					1	0
									1	0					0.933	0.067
									1	0					1	0
									1	0					1	0
									0.75	0.25					0.637	0.363
									1	0					0.217	0.783
									1	0					0.851	0.148
									0.235	0.765					1	0
									1	0					1	0
									0.116	0.884					0.165	0.835
									0.235	0.765					1	0
									1	0					0.758	0.242
									1	0					1	0
									1	0					0.069	0.931
									1	0					1	0
									1	0					0.766	0.234
									0.833	0.167					0.037	0.963
									0.717	0.283					0.918	0.081
									1	0					1	0
									1	0					1	0
									0.782	0.217					1	0
									0.75	0.25					1	0
									0	1					1	0
									0	1					0.46	0.54
									1	0					1	0
									1	0					1	0
									1	0					0.76	0.24
									1	0					0.294	0.705
									1	0					0.8	0.2
									0	1					0	1
									1	0					1	0
									0.112	0.888					1	0
									1	0					1	0
									1	0					1	0
									0.714	0.286					1	0
									1	0					0.421	0.579
									0.167	0.833					1	0
									0.269	0.731					0	1
									1	0					1	0
									1	0					1	0
									1	0					1	0
									1	0					1	0
									0.7	0.3					0.228	0.772
									1	0					0.841	0.159
									1	0					1	0
									1	0					0.643	0.357
									0.211	0.789					1	0
									1	0					1	0
									1	0					0.127	0.873
									1	0					1	0
									1	0					1	0
									1	0					1	0
									0	1					0.206	0.794
									1	0					1	0
									0.307	0.692					1	0
									1	0					1	0
									1	0					1	0
									1	0					1	0
									1	0					0.761	0.239
									1	0					1	0
									1	0					1	0
									1	0					0	1
									0	1					1	0
									0.32	0.68					1	0
									0	1					1	0
									1	0					0.793	0.207
									1	0					1	0
									1	0					1	0
									1	0					1	0
									0.25	0.75					0	1
									1	0					1	0
									1	0					1	0
									1	0					1	0
									0.147	0.853					1	0
									1	0					1	0
									1	0					0	1
									1	0					1	0
															0.758	0.242
								10	0.885	0.115					0.762	0.238
									1	0					1	0
									0.811	0.189					1	0
									0.827	0.173					1	0
									1	0					0.753	0.247
									1	0					0.214	0.786
									0.419	0.581					1	0
									0.478	0.522					1	0
									0	1					1	0
									0	1					1	0
															1	0
															1	0
									0.591	0.409		0.109	0.892		1	0
									0.917	0.083		1	0		1	0
								1	0.74	0.26		1	0		1	0
									0.909	0.091		0.088	0.912		0.91	0.09
									1	0		0.613	0.387		0	1
									0.434	0.566		0.232	0.768		1	0
									0.815	0.185		1	0		1	0
									0.856	0.144		0.381	0.619		1	0
									0	1		1	0		1	0
									0	1		1	0		1	0
									0.218	0.782		0.556	0.444		1	0
									1	0		1	0		1	0
									1	0		0.854	0.146		0	1
									1	0		0.833	0.167		1	0
									0.652	0.349		0.681	0.319		1	0
									0.053	0.947		0.811	0.189		1	0
									1	0		0.862	0.138		0.091	0.909
									0	1		1	0		0	1
									1	0		0.39	0.61		1	0
									0.453	0.547		0.65	0.35		0.345	0.655
									1	0		1	0		0.859	0.141
									0.654	0.346		0.759	0.241		1	0
									1	0		1	0		1	0
									1	0		0.71	0.289		1	0
									0	1		0.853	0.147		1	0
									1	0		0.884	0.116		1	0
									0	1		0.808	0.192		1	0
									0.533	0.467		1	0		0.081	0.919
									0.057	0.943		1	0		1	0
									1	0		0	1		0.648	0.352
									1	0		1	0		0.361	0.639
									1	0		1	0		0.353	0.647
									0.048	0.951		1	0		0.667	0.333
									0.632	0.368		1	0		0	1
									1	0		0.857	0.143		1	0
									1	0		0.188	0.813		1	0
									0.062	0.938		1	0		0.067	0.933
									0	1		0.725	0.275		0	1
									0.02	0.98		0	1		1	0
									1	0		0.889	0.111		1	0
									1	0		0.765	0.235		1	0
									0	1		1	0		1	0
									0.9	0.1		0.35	0.65		0.5	0.5
									0	1		0.664	0.336		1	0
									1	0		1	0		0.611	0.389
									0.349	0.651		0.39	0.61		1	0
									0.833	0.167		1	0		0	1
									1	0		0.129	0.871		1	0
									0.543	0.457		0.659	0.341		1	0
									1	0		1	0		1	0
									0.174	0.826		0.667	0.333		1	0
									1	0		1	0		1	0
									0	1		0	1		1	0
									1	0		0.353	0.647		0	1
									1	0		0.286	0.714		1	0
									1	0		1	0		1	0
									1	0		1	0		1	0
									1	0		1	0		1	0
									1	0		1	0		0	1
									1	0		1	0		1	0
												0.128	0.872		1	0
									1	0					1	0
									0.92	0.08		1	0		1	0
								2	0.933	0.067		1	0		1	0
									1	0		0.353	0.647		1	0
									1	0		0.263	0.738		1	0
									1	0		0.894	0.106		1	0
									1	0		1	0		1	0
									1	0		0.957	0.043		0.607	0.393
									1	0		0.881	0.119		1	0
									1	0		0.925	0.075		0.5	0.5
									1	0		1	0		1	0
									0.623	0.377		1	0		1	0
									1	0		0.882	0.118		1	0
									1	0		0.75	0.25		1	0
									1	0		1	0
									1	0		1	0		1	0
									0.237	0.763		1	0		1	0
									0.673	0.327		0.394	0.605		1	0
									1	0		1	0		0.815	0.185
									0.784	0.216		0.643	0.357		0.801	0.199
									0.714	0.286		0	1		1	0
									1	0		1	0		1	0
									1	0		1	0		0.31	0.69
									0.417	0.583		0.8	0.2		1	0
									1	0		1	0		0.145	0.855
									1	0		0.842	0.158		1	0
									1	0		1	0		0.512	0.488
									1	0		1	0		1	0
									1	0		1	0		0.936	0.064
									1	0		0.809	0.19		0.619	0.381
									0.157	0.843		0.312	0.687		1	0
									0.165	0.836		1	0		1	0
									0.142	0.858		1	0		0.832	0.169
									1	0		0.429	0.571		1	0
									1	0		0.15	0.849		1	0
									1	0		0.121	0.879		0	1
									1	0		0.452	0.548		0.54	0.46
									1	0		1	0		0.938	0.062
									0.234	0.766		1	0		1	0
									1	0		0.6	0.4		1	0
									1	0		0.455	0.545		1	0
									1	0		1	0		1	0
									1	0		0.867	0.133		0.941	0.059
									1	0		0.682	0.318		1	0
									1	0		1	0		1	0
									0.818	0.182		1	0		1	0
									1	0		1	0		0.111	0.889
									1	0		1	0		0.126	0.874
									1	0		1	0		1	0
									1	0		1	0		1	0
									1	0		0	1		0.195	0.805
									1	0		0.174	0.826		0.466	0.534
									0.156	0.844		1	0		1	0
									1	0		0.195	0.805		0.548	0.452
									0.337	0.663		0	1		1	0
									1	0		0	1		0	1
									1	0		0	1		0.391	0.609
									1	0		1	0		1	0
									0.062	0.937		1	0		1	0
									0	1		0.486	0.514		0.731	0.269
									1	0		0	1		0	1
									1	0		1	0		1	0
									0.533	0.468		0.897	0.103		0.444	0.556
									1	0		0	1		0.151	0.849
									1	0		1	0		0.293	0.707
									1	0		1	0		0.719	0.281
									1	0		1	0		1	0
									0.692	0.308		0.018	0.982		1	0
									1	0		0.727	0.273		1	0
									1	0		0.818	0.182		1	0
									0.429	0.571		0.774	0.226		1	0
									0.75	0.25		0.555	0.444		0.419	0.581
									0.656	0.344		0.674	0.326		1	0
									1	0		0.5	0.5		1	0
									1	0		0.143	0.857		1	0
									1	0		0.112	0.888		1	0
									1	0		1	0		1	0
									1	0		1	0		1	0
									1	0		1	0		0.287	0.713
									0.09	0.91		0.467	0.533		1	0
									1	0		1	0		0.658	0.342
									1	0		0.5	0.5		1	0
									1	0		1	0		1	0
									1	0		1	0		0.727	0.273
									1	0		1	0		1	0
									1	0		0.538	0.462		0.189	0.811
									1	0		0.706	0.294		1	0
									1	0		1	0		0	1
									1	0		1	0		0	1
									1	0		0	1		1	0
									0.245	0.755		0.267	0.733		1	0
									1	0		0.812	0.188		1	0
									1	0		0.837	0.163		0.385	0.615
									1	0		1	0		1	0
									0.591	0.409		1	0		0	1
									1	0		1	0		0.812	0.188
									1	0		0.588	0.412		1	0
									0.423	0.577		0.333	0.667		1	0
									1	0		1	0		1	0
									1	0		1	0		0.913	0.087
									1	0		0	1		1	0
									0	1		1	0		1	0
									0.132	0.868		1	0		0.5	0.5
									1	0		1	0		1	0
									1	0					1	0
									1	0		0.254	0.745		0	1
									1	0		0.312	0.688		0	1
									1	0		1	0		0.241	0.759
									0.115	0.885		1	0		1	0
									1	0		0.818	0.182		0.324	0.676
									1	0		1	0		0.882	0.118
									0.409	0.591		1	0		1	0
									0.857	0.143		0.407	0.593		1	0
									0	1		1	0		0	1
									0	1		1	0		1	0
									0	1		1	0		0	1
									0.5	0.5		1	0		0.886	0.114
									0	1		0.907	0.094		1	0
									1	0		1	0		1	0
									1	0		0.25	0.75		1	0
									0.952	0.048		1	0		1	0
												1	0		1	0
									1	0		1	0		1	0
									0.685	0.315		1	0		0	1
								3	0.842	0.158		1	0		1	0
									0.943	0.057		0.583	0.417		1	0
									1	0		0.585	0.414		0.615	0.385
									0.796	0.205		0.094	0.906		0	1
									0.945	0.056		1	0		0	1
									0.455	0.545		0	1		0.17	0.83
									1	0		0.039	0.961		1	0
									0.054	0.946		1	0		1	0
									1	0		1	0		1	0
									1	0		1	0		0	1
									1	0		0.884	0.116		1	0
									0.3	0.7		1	0		1	0
									1	0		1	0		0.474	0.526
									0.889	0.111		1	0		0	1
									1	0		1	0		1	0
									1	0		1	0		1	0
									0.721	0.279		0.207	0.794		1	0
									1	0		0	1		0	1
									1	0		0.068	0.932		0.368	0.632
									0.809	0.19		1	0		1	0
									0.515	0.486		1	0		0	1
									0.833	0.167		0.577	0.423		1	0
									0.938	0.062		1	0		0	1
									1	0		1	0		1	0
									1	0		1	0		0.737	0.262
									1	0		1	0
									1	0		0.179	0.821		1	0
									1	0		1	0		1	0
									0.86	0.14		1	0		0.786	0.214
									0.659	0.341		0.617	0.383		0.133	0.867
									0.375	0.625		1	0		1	0
									1	0		1	0		0.066	0.934
									1	0		1	0		0.671	0.329
									1	0		1	0		1	0
									0.852	0.148		0.912	0.088		0.969	0.031
									1	0		0.944	0.056		0.952	0.048
									0.76	0.24		0.785	0.214		1	0
									1	0		1	0		1	0
									1	0		0.379	0.621		1	0
									1	0		1	0		1	0
									1	0		1	0		0.279	0.721
									0.434	0.565		1	0		0.919	0.081
									0.47	0.529		0.412	0.588		0.967	0.033
									1	0		1	0		0.176	0.824
									0.27	0.73		1	0		1	0
									1	0		0.103	0.897		0.279	0.721
									0.378	0.622		1	0		1	0
									1	0		0	1		0.904	0.096
									1	0		0.077	0.923		1	0
									0.797	0.204		0.6	0.4		0.833	0.167
									0.82	0.18		1	0		1	0
									0.555	0.444		1	0		0.366	0.634
									1	0		1	0		1	0
									1	0		0.233	0.767		0.216	0.784
									0.324	0.676		0.098	0.902		0.549	0.452
									1	0		0.539	0.462		1	0
									1	0		0.645	0.355		0.374	0.625
									0	1		0.138	0.862		0.89	0.11
									1	0		0.226	0.774		0.164	0.836
									0.853	0.147		0.756	0.244		0	1
									1	0		1	0		0.202	0.798
									0.893	0.107		0.212	0.788		0	1
									1	0		0.071	0.929		0	1
									1	0		0.019	0.981		1	0
									0.75	0.25		0	1		1	0
									1	0		1	0		0.817	0.183
									1	0		0.905	0.095		1	0
									1	0		0.572	0.429		1	0
									0	1		1	0		1	0
									0.473	0.528		0.52	0.48		0.967	0.033
									0.115	0.885		0.636	0.364		1	0
									0	1		0.714	0.286		1	0
									1	0		1	0		0.5	0.5
									1	0		0.908	0.093		0.903	0.097
									0.667	0.333		1	0		0.216	0.784
									1	0		1	0		0.854	0.147
									1	0		1	0		0.671	0.329
									0.5	0.5		0	1		0.14	0.86
									0.95	0.05		1	0		0.943	0.057
									1	0		0.167	0.833		0.284	0.716
									1	0		1	0		0.94	0.06
									0.351	0.648		0.279	0.721		0.841	0.159
									1	0		1	0		1	0
									0.475	0.526		1	0		0.167	0.833
									1	0		1	0		1	0
									0.647	0.353		0.612	0.388		1	0
									1	0		1	0		0.22	0.78
									1	0		1	0		1	0
									0.589	0.41		0.186	0.814		0.386	0.614
									0.75	0.25		1	0		0.086	0.914
									0.513	0.487		0.773	0.227		0.587	0.413
									0.149	0.851		0	1		1	0
									1	0		0.434	0.565		1	0
									1	0		0.4	0.6		1	0
									0.299	0.702		1	0		0.571	0.429
									0.353	0.647		0.429	0.571		1	0
									1	0		1	0		0.116	0.884
									1	0					0.211	0.789
									0.083	0.917		0.454	0.546		1	0
									1	0		0.913	0.087		0.127	0.873
									0.308	0.692		0.408	0.592		0.022	0.978
									0.5	0.5		0.733	0.267		0.054	0.946
									1	0		0.125	0.875		0	1
									1	0		0.438	0.562		0	1
									0.184	0.817		0.532	0.468		0.651	0.349
									0.455	0.545		0.15	0.85		1	0
									0	1		1	0		0.689	0.312
									0	1		0	1		0.524	0.476
									1	0		0.081	0.919		0.387	0.613
									1	0		1	0		0.359	0.641
									0.204	0.796		0.252	0.747		1	0
									1	0		0.75	0.25		0	1
									0.435	0.565		0.299	0.701		1	0
									0	1		0.877	0.123		1	0
									0.167	0.833		0.917	0.083		0.546	0.453
									0.44	0.56		0.345	0.655		0.349	0.651
									1	0		0.2	0.8		1	0
												1	0		1	0
									0.944	0.056		1	0		0.666	0.333
									1	0		0.189	0.811		0.447	0.553
								4	0.625	0.375		0	1		1	0
									0.186	0.814		1	0		1	0
									1	0		0.078	0.922		1	0
									1	0		0.675	0.324		1	0
									0.9	0.1		0.346	0.655		1	0
									1	0		0.656	0.343		1	0
									1	0		0.385	0.615		0.816	0.184
									0.583	0.417		0	1		0	1
									0.83	0.17		0.706	0.294		1	0
									0.25	0.75		0	1		1	0
									1	0		0.352	0.647		0.516	0.485
									0.79	0.209		0	1		0	1
									0.03	0.97		0.184	0.816		0.619	0.381
									1	0		0	1		1	0
									1	0		0	1		1	0
									1	0		0.583	0.417		0	1
									1	0		0.609	0.391		0.913	0.087
									0.464	0.536		0	1		1	0
									1	0		0.429	0.571		1	0
									1	0		0.058	0.942		0.078	0.922
									1	0		1	0		1	0
									1	0		0	1		1	0
									0.405	0.596		1	0		1	0
									0.359	0.641		1	0		0.069	0.931
									1	0		0	1		1	0
									1	0		0.68	0.32		1	0
									1	0		1	0		1	0
									0.134	0.866		0	1		1	0
									1	0		0.643	0.357		0	1
									1	0		1	0		0.364	0.636
									1	0		0.4	0.6		1	0
									1	0					1	0
									1	0		0.113	0.887		1	0
									1	0		1	0		1	0
									1	0		1	0		1	0
									1	0		1	0		1	0
									1	0		1	0		1	0
									1	0		1	0		0.4	0.6
									1	0		1	0		1	0
									1	0		0.349	0.651		0	1
									0.295	0.705		1	0		1	0
									1	0		0.18	0.82		1	0
									1	0		1	0		1	0
									0.6	0.4		0.688	0.312		1	0
									0.199	0.801		0.923	0.077		0.125	0.875
									1	0		1	0		1	0
									1	0		1	0		1	0
									0.891	0.109		0.148	0.852		1	0
									1	0		0.778	0.222		1	0
									1	0		0	1		1	0
									1	0		0	1		1	0
									0.533	0.467		0.357	0.643		1	0
									1	0		0.267	0.734		0.2	0.8
									1	0		0	1		1	0
									1	0		0.611	0.389		0.353	0.647
									1	0		0.8	0.2		1	0
									0.619	0.381		1	0		1	0
									1	0		1	0		1	0
									0.286	0.714		1	0		1	0
									1	0		0	1		1	0
									0.824	0.176		0.361	0.639		1	0
									0.078	0.922		0.269	0.731		1	0
									0.264	0.736		0.133	0.867		1	0
									0.824	0.176		1	0		1	0
									1	0		0.245	0.755		0	1
									0.262	0.738		1	0		0	1
									0.407	0.593		0	1		1	0
									0.646	0.354		0.815	0.185		1	0
									1	0		1	0		0.065	0.935
									0.556	0.444		1	0		0.176	0.824
									1	0		0.611	0.389		0	1
									1	0		0	1		0.714	0.286
									1	0		1	0		0	1
									0.363	0.637		1	0		1	0
									0.437	0.562		0.44	0.56		0.128	0.872
									0.217	0.783		1	0		0.149	0.851
									0	1		1	0		0	1
									1	0		1	0		0	1
									1	0		1	0		0.258	0.742
									0	1		0.467	0.533		1	0
									0.304	0.696		0.333	0.667		1	0
									0.353	0.647		0.867	0.133		1	0
									1	0		1	0		1	0
									1	0		0.513	0.487		1	0
									1	0		1	0		1	0
									1	0		0.536	0.464		1	0
									0.923	0.077		0	1		0.273	0.727
									0.388	0.613		0	1		0.533	0.467
									1	0		0	1		1	0
									1	0		0.208	0.792		1	0
									1	0		1	0		1	0
									1	0		0.284	0.716		0	1
									0.079	0.921		0	1		0.375	0.625
									0	1		0.598	0.402		0.182	0.818
									1	0		0.182	0.818		1	0
									0	1		0.222	0.778		0	1
									1	0		0	1		0	1
									1	0		0.2	0.8		0.221	0.779
									1	0		0.467	0.533		1	0
									1	0		0.647	0.353		0.897	0.103
									1	0		1	0		1	0
									0.227	0.773		0.434	0.565		1	0
									1	0		1	0		1	0
									1	0		0.486	0.514		0	1
									1	0		0	1		1	0
									1	0		0	1		1	0
									0.385	0.615		0	1
									0.049	0.951		1	0		0.152	0.848
									1	0		1	0		0.834	0.167
									1	0		1	0		0.923	0.077
									1	0		0	1		1	0
									1	0					1	0
									1	0		0.404	0.597		1	0
									0	1		0.913	0.088		1	0
									0.145	0.855		0.864	0.136		0.437	0.562
									1	0		1	0		1	0
									0	1		1	0		0	1
									0	1		1	0		0.745	0.255
									0.533	0.467		0.455	0.545		1	0
									1	0		0.854	0.146		0.751	0.249
									0	1		1	0		0.258	0.742
									1	0		1	0		0.299	0.701
									1	0		0.491	0.509		0.846	0.154
									0.203	0.797		1	0		1	0
									1	0		1	0		0.934	0.066
												0.505	0.495		0.829	0.171
									0.933	0.067		0	1		1	0
									0.247	0.753		0.043	0.957		0.411	0.588
								5	0.906	0.094					0.576	0.424
									1	0					0.241	0.758
									0.414	0.586					0.684	0.316
									0.033	0.967					0.665	0.335
									1	0					0.086	0.914
									1	0					0.163	0.837
									1	0					1	0
									1	0					1	0
									1	0					0	1
									0.627	0.373					0.048	0.952
									0.42	0.58					0	1
									1	0					1	0
									1	0					0.15	0.85
									1	0					1	0
									1	0					1	0
									0.811	0.189					1	0
									0.253	0.747					0.156	0.844
									0	1					0.214	0.786
									0.65	0.35					1	0
									0.381	0.619					0.094	0.906
									0.464	0.536					0	1
									0.385	0.615					0	1
									0.925	0.075					1	0
									0.332	0.668					0	1
									0.139	0.861					1	0
									0	1					0.104	0.896
									1	0					0.153	0.847
									1	0					0.154	0.846
									1	0					1	0
									0	1					0.578	0.422
									0	1					1	0
									1	0
									0.514	0.486					0.464	0.536
									0.375	0.625					1	0
									1	0					0.701	0.299
									0.283	0.717					1	0
									0.234	0.766					1	0
									1	0					1	0
									1	0					1	0
									1	0					0.35	0.65
									0.933	0.067					1	0
									1	0					0.156	0.844
									1	0					1	0
									1	0					1	0
									1	0					0.178	0.822
									1	0					1	0
									1	0					0.118	0.882
									1	0					1	0
									0.253	0.747					1	0
									0	1					1	0
															0.239	0.761
									1	0					0.25	0.75
									0.958	0.042					0.261	0.739
								6	0.932	0.068					1	0
									0.102	0.898					1	0
									0.847	0.153					1	0
									1	0					0.98	0.02
									0.969	0.031					0.957	0.043
									1	0					0.951	0.049
									0.699	0.301					1	0
									0.813	0.188					0.393	0.606
									0.871	0.129					1	0
									0.214	0.787					0.676	0.324
									0.074	0.926					1	0
									0.364	0.636					1	0
									0.147	0.853					0.5	0.5
									0.438	0.562					1	0
									1	0					1	0
									0.388	0.612					0.889	0.111
									1	0					0	1
									0.187	0.813					0	1
									0.561	0.439					1	0
									1	0					0.296	0.704
									1	0					0.625	0.375
									0.735	0.265					1	0
									1	0					0.95	0.05
									0.455	0.545					1	0
									0.084	0.916					0.692	0.308
									1	0					0.213	0.787
									1	0					1	0
									0.5	0.5					0.945	0.055
									0.867	0.133					1	0
									0.171	0.829					0.639	0.361
									0.809	0.19					0.971	0.029
									0.39	0.61					1	0
									0	1					0.958	0.042
									0.211	0.789					0.825	0.175
									1	0					1	0
									1	0					1	0
									0.333	0.667					1	0
									0	1					1	0
									0	1					0.889	0.111
									0	1					0.907	0.093
															0.347	0.653
									0.935	0.065					0.957	0.043
									1	0					1	0
								7	1	0					1	0
									1	0					0.793	0.207
									0.932	0.068					1	0
									1	0					1	0
									1	0					0.355	0.645
									1	0					0.857	0.143
									1	0					0.8	0.2
									1	0					0.282	0.718
									0.769	0.231					0.057	0.943
									1	0					0	1
									1	0					0.571	0.429
									1	0					0.505	0.495
									1	0					1	0
									0.753	0.246					1	0
									1	0					1	0
									0.274	0.726					1	0
									0.941	0.059					0.828	0.172
									1	0					1	0
									1	0					1	0
									0.637	0.364					1	0
									0.684	0.316					1	0
									0.268	0.732					1	0
									0.36	0.64					1	0
									1	0					0.871	0.129
									0.321	0.678					1	0
									0.275	0.725					0.412	0.588
									1	0					1	0
									1	0					0.966	0.034
									1	0					1	0
									0.944	0.056					1	0
									0.776	0.224					1	0
									1	0					1	0
									1	0					1	0
									1	0					0.402	0.597
									1	0					1	0
									0.472	0.528					1	0
									1	0					1	0
									1	0					0.489	0.511
									1	0					0.729	0.27
									0.847	0.154					1	0
									0.047	0.953					0.967	0.033
									0.808	0.192					1	0
									1	0					1	0
									1	0					0.891	0.109
									1	0					1	0
									1	0					1	0
									1	0					0.457	0.543
									1	0					0	1
									0.615	0.385					0	1
									1	0					1	0
									1	0					0.959	0.041
									0.77	0.231					0.063	0.937
									0.75	0.25					1	0
									0.771	0.229					0.363	0.637
									1	0					0.579	0.421
									1	0					1	0
									0	1					1	0
									1	0					0.682	0.318
									1	0					0.713	0.288
									1	0					1	0
									1	0					1	0
									1	0					1	0
									0.447	0.553					0.286	0.714
									1	0					0.3	0.7
									1	0					0.52	0.48
									1	0					1	0
									1	0					1	0
									1	0					0.475	0.525
									0.704	0.296					0.688	0.312
									0.637	0.364					1	0
									1	0					1	0
									1	0					1	0
									1	0					1	0
									0.667	0.333					1	0
									0.704	0.296					1	0
									0	1					1	0
									1	0					1	0
									0.667	0.333					1	0
									0.6	0.4					0.956	0.043
									1	0					0.719	0.281
									1	0					1	0
									1	0					1	0
									1	0					1	0
									0	1					0.426	0.574
									1	0					0.195	0.805
									0.016	0.984					0	1
									0.133	0.868					1	0
									1	0					1	0
									1	0					0.759	0.241
									1	0					0.706	0.294
									1	0					0.417	0.583
									0.286	0.714					1	0
									0.481	0.519					1	0
									0	1					0.563	0.437
									0.5	0.5					1	0
									1	0					1	0
									1	0					1	0
									1	0					0	1
									1	0					1	0
									1	0					1	0
									0	1					1	0
									0.205	0.795					1	0
									1	0					1	0
									1	0					0	1
									1	0					1	0
									1	0					1	0
									0.885	0.115					0.094	0.906
									0.4	0.6					1	0
									1	0					0.455	0.545
									1	0					0.513	0.487
									0.98	0.02					1	0
									0.5	0.5					1	0
									0.545	0.455					0.177	0.823
									1	0					0.283	0.716
									1	0					1	0
									1	0					1	0
									0.375	0.625					0.75	0.25
									1	0					1	0
									1	0					0	1
									1	0					1	0
									0.872	0.128					0.217	0.783
									0	1					1	0
									1	0					1	0
									1	0					1	0
									0.229	0.771					0	1
									1	0					1	0
															0.714	0.286
															1	0
															1	0
									0.256	0.744		0.632	0.368		1	0
									0.367	0.634		0.075	0.925		1	0
									0	1		1	0		1	0
									0.784	0.216		1	0		0.818	0.182
									0	1		0.477	0.523		0.2	0.8
									0	1		0	1		0.685	0.315
									1	0		0	1		1	0
									0.315	0.685		0	1		0.724	0.276
												0	1		0	1
									1	0		0.659	0.341		1	0
									1	0		1	0		1	0
									0.799	0.202					1	0
								1	0.281	0.719		0.741	0.259		1	0
									1	0					0	1
									0.418	0.582		0.537	0.463		1	0
									1	0		0.885	0.115		0.357	0.643
									0.434	0.566		1	0		0	1
									0.545	0.455		0	1		1	0
									1	0		0	1		0.167	0.833
									0	1		1	0		0.6	0.4
									0	1		1	0		0.706	0.294
									0	1		0	1		0.583	0.417
									1	0		1	0		1	0
									0.403	0.597		0	1		0	1
									0	1		1	0		1	0
									0	1		0.472	0.528		1	0
									0	1		1	0		0.318	0.682
									1	0		0	1		1	0
												0.373	0.627		0	1
									0.799	0.201		1	0		1	0
									1	0					0	1
									0.896	0.104		1	0		1	0
									1	0		0.23	0.77
									0.667	0.333		0.593	0.407		0.96	0.04
									0.9	0.1		0	1		1	0
									1	0		0.85	0.15		0.671	0.329
									1	0		0.597	0.403		0.528	0.472
									0.708	0.292		0.542	0.458		0.962	0.038
									0.763	0.238		1	0		1	0
									0.455	0.546		0.951	0.049		1	0
									1	0		0.191	0.809		0.312	0.688
									1	0		0.387	0.612		0.492	0.508
									1	0		0.376	0.625		0.974	0.026
									1	0		0.449	0.551		0.43	0.57
									0.706	0.294		0.121	0.879		1	0
									1	0		0	1		1	0
									1	0		1	0		1	0
									0	1		0.659	0.341		1	0
									0	1		0.879	0.122		0.86	0.14
									0.4	0.6		0.088	0.912		0.792	0.208
									0.404	0.596		0.331	0.669		0.29	0.711
									1	0		1	0		1	0
									0.376	0.625		1	0		0.279	0.721
									1	0		1	0		0.733	0.267
									0.915	0.085		0	1		1	0
									1	0		1	0		1	0
									0.624	0.376		1	0		0.42	0.58
									0.324	0.677		1	0		1	0
									1	0					0.265	0.735
									0.168	0.832		1	0		1	0
									0.753	0.247		1	0		1	0
									1	0		0.433	0.566		1	0
									0.673	0.327		1	0		1	0
									0	1		1	0		1	0
									1	0		1	0		1	0
									1	0		0.709	0.291		1	0
									1	0		1	0		0.8	0.2
									1	0		1	0		0.346	0.654
									1	0		1	0		0.293	0.707
									1	0		1	0		1	0
									0.81	0.19		0	1		0.758	0.242
									1	0		0.386	0.614		0	1
									0.772	0.228		0.695	0.304		1	0
									1	0		0.437	0.563		1	0
									1	0		1	0		0.86	0.14
									0.679	0.321		1	0		1	0
									0.166	0.834		1	0		1	0
									0.102	0.898		1	0		1	0
									1	0		0.695	0.304		0.097	0.903
									0	1		1	0		0.907	0.093
									0	1		0	1		0.118	0.882
									0.491	0.509		1	0		0	1
									1	0		0.5	0.5		0	1
									0	1		1	0		1	0
									0.772	0.227		1	0		0.575	0.425
									1	0		1	0		1	0
									1	0		0.507	0.493		0.458	0.542
									1	0		1	0		0.059	0.941
									1	0		0.68	0.32		1	0
									0	1		1	0		1	0
									1	0		1	0		1	0
									0	1		1	0		1	0
												1	0		1	0
									1	0		0.391	0.609		1	0
									1	0		0.477	0.523		1	0
									0.375	0.625		1	0		0	1
									1	0		1	0		1	0
									1	0					1	0
									0.398	0.603		0.167	0.833		1	0
									0.405	0.595		1	0		1	0
									1	0		1	0		1	0
									0.921	0.079		0.789	0.211		1	0
									0.259	0.741		0.972	0.028		0.303	0.697
									1	0		1	0		1	0
									1	0		0.606	0.394		0.18	0.82
									0	1		0.739	0.261		0.786	0.214
									1	0		1	0		0	1
									1	0		1	0		1	0
									0.075	0.925		1	0		0	1
									1	0		0.827	0.173		0	1
									1	0		1	0		0.696	0.304
									1	0		0	1		0	1
									1	0		0	1		1	0
									1	0		0	1		1	0
									1	0		0	1		0	1
									1	0		0	1		0	1
									0.707	0.293					1	0
									1	0		1	0		0	1
									1	0		1	0		0.361	0.639
									0.54	0.46		0.891	0.109		1	0
									0	1		0.053	0.947		1	0
									1	0		1	0		0.305	0.695
									0.039	0.961		1	0		1	0
									0.016	0.984		0.232	0.768		1	0
									0	1		0.213	0.787		0.147	0.853
									0	1		0.73	0.27		0.106	0.894
												1	0		1	0
									1	0		1	0		1	0
									0.083	0.917		1	0		0.344	0.655
									0	1		1	0		0.579	0.421
								2	0	1		0.741	0.259		0.468	0.532
									0.288	0.712		1	0		1	0
									0	1		0	1		1	0
									0	1		1	0		0.607	0.393
									0	1		0.436	0.564		1	0
									1	0		0.187	0.813		1	0
									0.597	0.403		0.672	0.328		0	1
									0.545	0.455		0.574	0.426		0	1
												1	0		0.486	0.514
									1	0		1	0
									0.925	0.074		0	1		1	0
									0.591	0.409		1	0		1	0
								3	0.524	0.476		0	1		1	0
									1	0		0	1		1	0
									1	0		1	0		0.863	0.137
									0.131	0.869		0.792	0.208		0.534	0.466
									0	1		0	1		0.526	0.473
									1	0		0	1		1	0
									0	1		1	0		1	0
									0	1					1	0
									1	0		0	1		1	0
									1	0		0.409	0.591		1	0
									1	0		1	0		1	0
									0	1		0.528	0.472		1	0
												0.833	0.167		1	0
									0.945	0.056		0.726	0.274		1	0
									1	0		0.456	0.544		0.12	0.88
									1	0		0.536	0.464		0.877	0.123
								4	1	0		0.597	0.403		0.88	0.119
									1	0		0.939	0.061		0.938	0.062
									0.608	0.392		0.582	0.418		0.891	0.109
									0.264	0.736		1	0		0.925	0.075
									0.366	0.635		1	0		1	0
									1	0		0.434	0.565		1	0
									0.918	0.082		0.575	0.425		0.119	0.881
									1	0		0.726	0.274		1	0
									1	0		0.125	0.875		1	0
									0.304	0.696		0	1		1	0
									1	0		1	0		0.404	0.596
									1	0		1	0		1	0
									0.076	0.924		1	0		1	0
									1	0		0	1		0.568	0.432
									0.074	0.926		0.167	0.833		1	0
									0.672	0.328		0.123	0.877		1	0
									1	0		1	0		1	0
									1	0		1	0		0.176	0.824
									0.925	0.075		1	0		0.318	0.682
									0	1		1	0		1	0
									1	0		0.95	0.05		1	0
									1	0					1	0
									1	0		1	0		0.223	0.776
									1	0		1	0		1	0
									1	0		0.712	0.288		0.136	0.864
									1	0		0.9	0.1		1	0
									0.831	0.169		0.776	0.224		1	0
									1	0		1	0		1	0
									1	0		0.203	0.797		1	0
									0	1		0.476	0.523		0.857	0.143
									1	0		1	0		1	0
									0.787	0.213		1	0		1	0
									0.293	0.707		1	0		0.5	0.5
									0.31	0.69		0.843	0.157		1	0
									1	0		1	0		0.16	0.84
									1	0		0.879	0.121		0.145	0.855
									0	1		1	0		1	0
												1	0		1	0
									0.258	0.743		1	0		1	0
									1	0		0.041	0.959		1	0
									0.638	0.362		1	0		0	1
								5	1	0		1	0		1	0
									1	0		1	0		1	0
									1	0		0.17	0.83		1	0
									1	0		0.512	0.488		0	1
									1	0		0.426	0.574		0.153	0.847
									1	0		0.489	0.511		1	0
									0.063	0.937		1	0		1	0
									1	0		0	1		1	0
									1	0		0.777	0.224		0.26	0.74
									1	0		0	1		1	0
									0.698	0.302		0.504	0.495		0.202	0.798
									0.065	0.935		0.144	0.856		0.333	0.667
									0	1		0	1		1	0
									1	0		1	0		1	0
									0.862	0.137		1	0		1	0
									0.96	0.04		1	0		1	0
									0.046	0.954		1	0		1	0
									1	0		1	0		1	0
									1	0		0	1		1	0
									0	1		0	1		1	0
									1	0		0.364	0.636		1	0
									1	0		0	1		1	0
									0.49	0.511					1	0
									1	0		1	0		1	0
									1	0		0.722	0.278		0.471	0.529
									1	0		0.695	0.305		0.719	0.281
									1	0		1	0		0.415	0.585
									1	0		1	0		1	0
									1	0		0.367	0.633		1	0
									1	0		0.806	0.194		1	0
									0	1		0.773	0.227		1	0
									0	1		0	1		1	0
									0.612	0.388		0.489	0.511		0.577	0.423
									0.184	0.816		0	1		0.244	0.756
									1	0		0.244	0.756		1	0
									0	1		1	0		1	0
									0.073	0.927		1	0		0.722	0.278
									1	0		1	0		0	1
									1	0		0	1		1	0
									1	0		0	1		1	0
									1	0		0	1		1	0
									0.871	0.129		1	0		1	0
									0.261	0.739		1	0		1	0
									0	1		1	0		1	0
									0.108	0.892		0	1		1	0
									1	0		0	1		1	0
									1	0		0	1		1	0
									1	0					1	0
									0	1					1	0
									0	1					1	0
									1	0					1	0
									0	1					1	0
									1	0					1	0
									0.591	0.409					0.169	0.831
									0.667	0.333					0	1
									1	0					0.039	0.961
									1	0					0.28	0.72
															0	1
									1	0					1	0
									0.814	0.186					0.666	0.333
									1	0					0	1
								6	0.49	0.51					1	0
									0.516	0.484					1	0
									0.531	0.469					0.8	0.2
									1	0					0.75	0.25
									1	0					1	0
									1	0					1	0
									1	0					1	0
									0.579	0.421					0	1
									1	0					1	0
									0.107	0.893					1	0
									1	0					1	0
									0	1					1	0
									0.142	0.858					1	0
									0.253	0.747					0.833	0.167
									0	1					1	0
									0	1					1	0
									0.421	0.579					1	0
									0.651	0.349					1	0
									1	0					0.233	0.767
									0.217	0.783					0.4	0.6
									0.466	0.534					1	0
									0.43	0.57					1	0
									1	0					1	0
									0	1					1	0
									0	1					0.256	0.744
									1	0					1	0
									1	0					0	1
									1	0					1	0
									0.476	0.524					1	0
									0.338	0.662					1	0
									1	0					0	1
									1	0					0.158	0.842
									1	0					1	0
									0	1
									0.462	0.538					0.879	0.121
									0.845	0.154					1	0
									0.481	0.519					1	0
									0	1					0.71	0.29
									0	1					1	0
									0	1					1	0
									0	1					1	0
									1	0					1	0
															1	0
									0.19	0.81					0.532	0.468
									0.147	0.853					1	0
									0.766	0.234					0.868	0.132
								7	1	0					1	0
									0.796	0.204					0.881	0.119
									1	0					0.544	0.456
									0.367	0.633					1	0
									0.825	0.174					0.214	0.786
									0.961	0.039					0	1
									1	0					1	0
									1	0					0.356	0.644
									0.078	0.922					1	0
									0.327	0.673					0.389	0.611
									1	0					0.902	0.098
									0.799	0.201					1	0
									0.062	0.938					0.769	0.231
									0.741	0.259					1	0
									1	0					0.889	0.111
									1	0					0.479	0.521
									0.147	0.853					1	0
									0.798	0.202					0.596	0.404
									0.868	0.132					0.838	0.161
									1	0					0.963	0.037
									0.906	0.094					0.664	0.336
									1	0					1	0
									0.429	0.571					0.538	0.462
									1	0					0.912	0.088
									1	0					1	0
									1	0					0.375	0.625
									0	1					1	0
									0	1					0.797	0.203
									0	1					1	0
									0	1					0.495	0.505
									0	1					0.318	0.682
									0	1					0.771	0.229
									0.5	0.5					1	0
									1	0					0.5	0.5
									0.147	0.853					1	0
									1	0					0.66	0.339
									1	0					1	0
															1	0
									0.89	0.109					1	0
									1	0					1	0
									1	0					1	0
								8	1	0					0.9	0.1
									0.62	0.381					1	0
									0.275	0.725					1	0
									0.336	0.665					0.667	0.333
									0.194	0.806					0.561	0.439
									0.966	0.034					0	1
									1	0					0.333	0.667
									1	0					1	0
									0.48	0.52					1	0
									1	0					0	1
									0.795	0.205					1	0
									0.23	0.77					0.442	0.558
									1	0					0.111	0.889
									1	0					1	0
									1	0					0	1
									0.897	0.103					0.38	0.62
									1	0					0	1
									1	0					1	0
									0.411	0.589					0.886	0.114
									1	0					1	0
									0.6	0.4					0.788	0.212
									1	0					1	0
									1	0					1	0
									1	0					0.404	0.596
									1	0					1	0
									0.72	0.28					0	1
									1	0					0	1
									0.261	0.739					0.507	0.494
									1	0					1	0
									0.67	0.329					1	0
									1	0					1	0
									1	0					0.321	0.679
									1	0					0.381	0.619
									0	1					0.571	0.429
									1	0					1	0
									1	0					0.163	0.837
									1	0					0.089	0.911
									0	1					0.547	0.453
									1	0					0	1
									1	0					1	0
									1	0					0.167	0.833
									1	0					1	0
									0	1					1	0
									1	0					1	0
									0.46	0.54					1	0
									1	0					1	0
									1	0					1	0
									0	1					0.909	0.091
									1	0					0.961	0.039
									1	0					1	0
									1	0					0.775	0.225
									1	0					1	0
									1	0					1	0
									1	0					0	1
									1	0					0.221	0.779
									1	0					0.055	0.945
									0.69	0.31					1	0
									1	0					1	0
									1	0					0.377	0.623
									1	0					0.156	0.844
									1	0					0.743	0.257
									1	0					1	0
									0.176	0.824					1	0
									1	0					1	0
									1	0					1	0
									1	0					0.137	0.863
									1	0					0.882	0.118
									1	0					1	0
									0	1
									1	0					0.286	0.714
									1	0					1	0
									1	0					1	0
									1	0					0.95	0.05
									1	0					0.909	0.091
									1	0					0.665	0.334
									1.001	0					1	0
									0	1					1	0
									1	0					1	0
									1	0					1	0
									0.939	0.061					1	0
									0.645	0.355					1	0
									0	1					1	0
									1	0					0.694	0.306
									1	0					1	0
									0	1					1	0
									1	0					1	0
									0.356	0.644					1	0
									1	0					1	0
									1	0					0.926	0.074
									1	0					0.616	0.384
									1	0					0.571	0.429
									0	1					0.058	0.942
									0	1					1	0
									1	0					0.41	0.59
									1	0					1	0
									0.614	0.387					1	0
									0.463	0.536					0	1
									0	1					0.108	0.892
									1	0					0.923	0.077
									1	0					1	0
									0	1					1	0
									0	1					0.065	0.935
									1	0					1	0
									1	0					0.21	0.791
									1	0					0.353	0.646
									1	0					1	0
									1	0					1	0
									1	0					1	0
									1	0					0.964	0.036
									0	1					0.402	0.598
									0	1					0.432	0.568
									1	0					0.441	0.559
									0	1					0.442	0.558
									0.625	0.375					1	0
									1	0					0	1
									1	0					1	0
									1	0					1	0
									0	1					1	0
									1	0					1	0
									1	0					0.302	0.698
									1	0					0.758	0.242
									0	1					0.536	0.464
									0.214	0.786					0.735	0.265
									1	0					0	1
									1	0					0.897	0.103
									1	0					1	0
									1	0					0	1
									1	0					1	0
									1	0					1	0
									1	0					0	1
															0	1
									0.935	0.066					0	1
									1	0					1	0
									0.369	0.631
								9	0.79	0.21					0.704	0.295
									0.416	0.584					1	0
									1	0					0.951	0.049
									0.744	0.256					1	0
									1	0					1	0
									1	0					1	0
									1	0					1	0
									0.449	0.551					1	0
									1	0					0.676	0.324
									0	1					0.187	0.813
									0.017	0.983					1	0
									0	1					0.68	0.32
									0.634	0.366					0.73	0.27
									1	0					0.817	0.183
									0.478	0.522					0.916	0.085
									0	1					1	0
									0	1					0.134	0.865
									1	0					1	0
									0.36	0.64					0.62	0.38
									0	1					1	0
									0.076	0.924					1	0
									1	0					1	0
									0.376	0.624					1	0
									1	0					0.572	0.427
									1	0					0.236	0.763
									1	0					1	0
									1	0					1	0
									1	0					0.633	0.368
									1	0					1	0
									0	1					0.742	0.258
									0	1					1	0
									0	1					1	0
									0	1					1	0
									0.739	0.261					1	0
									1	0					1	0
									0	1					1	0
									0.136	0.864					1	0
									1	0					0.893	0.107
									1	0					0.958	0.041
									1	0					1	0
									0	1					0.982	0.018
									0.517	0.483					0.942	0.058
									0	1					1	0
									1	0					1	0
									0.828	0.172					1	0
									0	1					1	0
									1	0					1	0
									1	0					1	0
									1	0					1	0
									1	0					1	0
									0	1					0.915	0.085
									0	1					1	0
									0	1					0.895	0.105
									0.829	0.17					1	0
									1	0					1	0
									1	0					0.972	0.028
									1	0					1	0
									0	1					1	0
									0	1					1	0
									1	0					0.629	0.371
									1	0					0.93	0.07
									1	0					0.867	0.133
									0	1					0.474	0.526
									0	1					1	0
									1	0					0.882	0.118
									1	0					0.735	0.265
									0.486	0.514					1	0
									0	1					1	0
									0.609	0.391					1	0
									1	0					0.571	0.429
									0.36	0.64					1	0
									1	0					1	0
									0.605	0.395					1	0
									1	0					1	0
									0.325	0.675					0.898	0.102
									0	1					0.772	0.227
									0	1					1	0
									0	1					1	0
									1	0					0.867	0.133
									1	0					1	0
									1	0					1	0
									1	0					0.812	0.188
									1	0					1	0
															1	0
									1	0					1	0
									0.339	0.661					0.793	0.207
									0.612	0.388					0	1
								10	0.835	0.165					0.632	0.368
									0.692	0.308					1	0
									0	1					1	0
									0.62	0.379					0.172	0.828
									0.95	0.05					1	0
									0.155	0.845					1	0
									0.486	0.515					1	0
									0	1					1	0
									0	1					1	0
									1	0					1	0
									0	1					1	0
									1	0					1	0
									0.661	0.339					1	0
									0	1					1	0
									0	1					1	0
									0	1					1	0
									0	1					0.881	0.119
									0	1					0.025	0.975
									0.582	0.419					0.928	0.072
									0.505	0.495					0.862	0.138
									0	1					1	0
									1	0					0.912	0.088
									0	1					0.117	0.883
									0	1					1	0
									0	1					1	0
									0	1					0.975	0.025
[truncated: 1,742 more rows]

## Sheet: Immuno
Fig 1H / I	Scr, 45'	Scr, 60'	Sh10,45'	Sh10, 60'	Sh10+R, 45'	Sh10+R, 60'
	44.81	33.39	19.87	48.59	68.06	75.72
	47.43	63.28	23.06	39.93	93.18	40.51
	143.05	90.92	125.61	14.26	140.42	80.37
	154.86	48.81	155.8	35.28	117.17	137.83
	106.49	28.88	58.12	36	98.99	53.39
	45.56	66.77	56.62	11.93	274.28	61.53
	174.73	51.86	53.06	70.92	152.8	120.67
	64.12	128.6	46.87	40.3	70.12	90.92
	78.93	41.24	27.93	87.65	158.42	76.88
	50.99	24.8	76.12	41.9	77.05	130.49
	83.99	50.7	27.93	31.79	153.73	145.33
	120.36	49.24	81.37	7.06	144.92	114.92
	88.87	65.39				87.06
	184.85	319.38
	154.86	52.01
	45.75	165.76
	172.67	136.6
	38.62	64.59
	183.73	94.92
	72.74	68.37
	107.8	142.56
	61.87	192.89
	72.93	124.38
		215.22
		132.74
		146.71
	22.99	43.68	57.15	137.33	25.26	70.09
	101.19	140.57	16.19	86.97	44.04	39.76
	31.09	114.36	45.98	25.62	64.76	135.47
	174.22	84.03	28.5	19.14	33.68	87.86
	166.28	63.41	14.09	15.22	87.43	63.32
	139.24	144.99	54.73	18.65	43.72	11.49
	97.15	55.76	31.9	31.71	39.99	19.24
	67.84	85.5	37.73	19.04	73.35	147.15
		154.51	11.01	24.54	104.43	33.96
		113.18	38.53	12.07	64.93	110.63
			38.7	38.09	50.03	36.81
			19.43	16	32.06	31.12
			13.6	10.8	210.32	29.74
				13.15		69.4
	72.42	155.61	98.53	37.87	56.98	175.55
	58.39	111.76	90.39	32.27		92.69
	193.4	87.71	76.63	29.65		107.64
	119.02	86.46	45.47	57.68	72.98	71.89
	62.6	90.2	64.28	33.39	157.47	64.29
	98.53	98.67	87.86	28.03	89.26
	87.02	57.06	28.35	24.79	197.33	171.56
	102.18	69.52	138.11	54.57	150.18	89.45
	103.3	99.92	104.42	52.2	171.23	72.64
	72.7	133.68	122.11	68.52		72.76
	78.04	107.15	48.84	20.56	147.93	182.52
	152.42	95.06		55.44		228,62*
		117.11		25.29		206.94
		90.08
