# Supplementary material for: Regulation of different phases of AMPA receptor intracellular transport by 4.1N and SAP97
Source: eLife journal article supplement (doi:10.7554/elife.85609), 2023-04-06
Supplement: fig1-figsupp1-data1 [file sup Fig1- source data.xlsx]

## Sheet: Feuil1
Sup-Fig 1C	Mean speed	IN Scr 4.1	IN Sh 4.1	IN Scr SAP	IN Sh SAP	OUT Scr 4.1	OUT Sh 4.1	OUT Scr SAP	OUT Sh SAP	IN/OUT/Pause	Scr IN	OUT	PAUSE	Sh 4.1IN	OUT	PAUSE	Scr IN	OUT	PAUSE	Sh SAP97 IN	OUT	PAUSE
		1.9201	1.6514		1.20027	2.02509	1.71384	1.057	1.31113		1	0	0	0.068	0.145	0.786	0	0.514	0.486	0.115	0.304	0.58
		0.6189	2.635	1.70421	1.98771	1.42492	1.1105	1.79937	1.56737		1	0	0	0.914	0	0.086	0	1	0	0	1	0
		1.22725	1.75205	2.1266	1.15525	0.993077	1.05591	2.06464	0.631667		0	1	0	0.194	0.417	0.389	0	0	1	0	1	0
		1.78917	1.66241	1.47805	0.783333	2.45754	1.48186	1.8277	1.15427		0	1	0	0.574	0.426	0				0.217	0.533	0.25
		0.794375	1.09583	1.1507	1.05193	1.28537	1.78017	1.57503	1.78643		1	0	0	1	0	0	0	1	0	0.381	0.619	0
		1.014	0.988143	1.73732	1.676	1.19833	1.0132	1.8768	1.07567		0	1	0				0	1	0	0.273	0.636	0.091
		2.20575	1.2668	1.7419	0.74025	2.15404	1.14233	1.64211	1.83		0.317	0.085	0.598				0.298	0.702	0	0	1	0
		1.19859		1.37229	1.3358	1.32029		1.77573	1.79073		0.455	0	0.545	0	0.072	0.928	0	1	0	1	0	0
		1.07396		1.40618	0.907667	1.30455		1.34491	0.412667		0	1	0	0.292	0.104	0.604	0.2	0.553	0.247	0.533	0.467	0
		2.36481		2.27775	1.14325	2.58271		2.51433	1.15133		1	0	0	0.034	0.25	0.716	0.556	0.444	0	0	1	0
		1.0214		1.9521	0.877222	0.959		1.81434	1.10371		0	1	0	0	1	0	0.026	0.395	0.579	1	0	0
				1.93895	1.51662			2.11848	1.94155		1	0	0	0	1	0	0.321	0	0.679	1	0	0
		2.26995	1.58554	1.56503	1.27022	2.12506	1.75993	1.92247	1.44917		1	0	0	0	1	0	0	1	0	0.4	0	0.6
		2.60575	1.41355	1.34997		2.47792	1.66228	1.244			0.333	0.222	0.444	1	0	0	0	0.724	0.276	0.818	0	0.182
		2.27879	1.69579	1.86323		2.05644	1.69833	1.97927			1	0	0	0.941	0	0.059	0	1	0	0.159	0.381	0.46
		2.31258	1.27167	2.13811		2.63782	1.67591	2.54962			1	0	0	1	0	0	0.274	0.145	0.58	0	0	1
		1.89653	0.928842	1.24604		1.71003	1.42786	1.30068			0.258	0.645	0.097	1	0	0	0.23	0.266	0.504	1	0	0
		1.03895	1.81			1.34951	1.76077				1	0	0				0.405	0.524	0.071	1	0	0
		2.36404		1.08231	0.126	2.6849		0.956706	3.17		1	0	0	1	0	0	0	1	0	0.1	0.38	0.52
				1.71519	0.566			1.75705	0.677		1	0	0	0.597	0.188	0.215	0	0.722	0.278	0.344	0	0.656
		0.32975	1.49833	1.16329	0.6106	0.88425	1.08625	1.02917	1.208		0	0.833	0.167	0.429	0.571	0	0	1	0	0	0.467	0.533
		0.869833		1.59716	1.07075	1.61391	0.992	1.78446	0.6828		0	1	0	1	0	0	0.019	0.157	0.824	1	0	0
		1.16039	0.972286	1.15704	1.26314	1.29298	0.832111	1.21776	1.4148		0.068	0.904	0.027	0.053	0.394	0.553	0.36	0.24	0.4	1	0	0
		1.2823	1.1215	1.00627	0.731	1.40605	1.71125	0.7276	0.723		1	0	0	1	0	0	0.343	0.04	0.616	0	0	1
		1.99867	1.0178	1.64504	1.0015	1.4625	1.587	1.54493	0.940333		0	1	0	0.055	0.273	0.673	1	0	0	0	0	1
		2.22313	0.701455	0.848133	1.08691	1.299	0.947	0.867842	1.0836		0	0.512	0.488	1	0	0	0.87	0	0.13	0	1	0
		1.58211	1.235	0.85375	1.995	1.61123	1.23355	1.01682	0.6285		1	0	0	0.766	0.106	0.128	0.414	0.469	0.117	1	0	0
		0.949091	0.983045	1.56899	0.532	1.44427	1.31694	1.55973	0.51		0	1	0	0.378	0.322	0.3	0.481	0.247	0.272	0	0.084	0.916
		1.102	1.07495	1.00338	1.0884	1.04433	1.32906	0.985688	1.17702		1	0	0	0.465	0.24	0.295	0.056	0.224	0.72	0	0	1
		1.56083	1.334		1.038	1.15183	0.808615		1.626		0	1	0	0.12	0.293	0.587	0	0.857	0.143	0	1	0
		1.34827			0.697821	1.54663			0.856125		0.905	0	0.095	1	0	0	0.256	0.46	0.284	0	0	1
		1.3734				1.70232					1	0	0	0	0.933	0.067	0	1	0	1	0	0
		0.9628		1.37043		1.03046					1	0	0	0.105	0.075	0.82	0	1	0	0	0.132	0.868
				1.6925	1.1764			1.317			0	0.667	0.333	0	1	0	0	0	1	0	0	1
		1.86819	1.90481	1.8345	1.78105	2.03337	1.86261	1.78435	1.62811		0	0.714	0.286	1	0	0	0.258	0.484	0.258	1	0	0
		1.43492	1.45115	2.18015	2.1362	1.49709	1.60558	1.099	1.66306		0	1	0	1	0	0	0.089	0.911	0	1	0	0
		1.72359	0.988016	1.45507	1.1988	1.90755	1.33828	2.04011	1.20775		0	0	1	0.222	0.14	0.638	1	0	0	1	0	0
		1.36529	1.293	2.03133	1.19785	1.39668	1.14875	1.644	2.23104		1	0	0	1	0	0	0.25	0.75	0	0	0	1
		1.21575	1.70636	2.25293		1.36919	1.56178	2.0579	1.18093		1	0	0	1	0	0	0.098	0.824	0.078	0	1	0
			1.97081	1.44037			2.13486	2.75322			0	1	0	0	1	0	1	0	0	1	0	0
				1.82807				1.26596			0	0.978	0.022	0.17	0.28	0.55	0.333	0.37	0.296	0.174	0.826	0
								2.36913			1	0	0	0	0.586	0.414	0.032	0.243	0.725	1	0	0
											1	0	0	1	0	0	0.131	0.459	0.41	1	0	0
											0	1	0	0.364	0.182	0.455	1	0	0	0	0	1
											0	1	0	1	0	0	1	0	0	0.737	0.263	0
											0.935	0	0.065	1	0	0	0.259	0.224	0.517	1	0	0
											0	1	0	0.326	0.625	0.049	0	1	0	0.507	0.164	0.329
											1	0	0	1	0	0	0.469	0.122	0.408	1	0	0
											0.766	0.031	0.203	0	1	0	0	1	0	0.667	0.333	0
											0	0.815	0.185	0.707	0.171	0.122	0.084	0	0.916	0	0.195	0.805
											0.333	0.556	0.111	1	0	0	0	0.105	0.895	0.735	0.265	0
											1	0	0	0.621	0	0.379	0	0	1	1	0	0
											0	1	0	0.193	0.112	0.695	0.385	0.615	0	0.437	0	0.563
											0	0.286	0.714	1	0	0	0	1	0	0.727	0.273	0
											0.192	0.081	0.727	0.455	0.216	0.328	1	0	0	1	0	0
											0	1	0	0.293	0	0.707	0.219	0.406	0.375	0	0	1
											0.643	0.357	0	0.451	0.15	0.398	0	0	1	1	0	0
											1	0	0	0.326	0.09	0.584	0.233	0.395	0.372
											0	0	1	0.323	0.21	0.468	0.421	0.211	0.368	0.286	0.279	0.434
											0	1	0	0	1	0	0	0	1	0	0.355	0.645
											0	1	0	0	1	0	0	1	0	0	1	0
											1	0	0	0.739	0.261	0	0	1	0	0.565	0.246	0.188
											0	1	0	0.538	0.462	0	0	1	0	0	1	0
											0	0	1	0	1	0	0	1	0	0.086	0.914	0
											0	1	0	0	0	1	0.518	0.339	0.143	0.429	0.571	0
											0	1	0	1	0	0	0	1	0	0	0.4	0.6
											1	0	0	0	1	0	0.611	0.389	0	0	0.114	0.886
											0	0	1	0	1	0	0.25	0.75	0	0	0	1
											1	0	0	0	0.043	0.957	0	0.735	0.265	0	0.164	0.836
											0	0.364	0.636	1	0	0	0.556	0.444	0	0	0.479	0.521
											0	1	0	0.125	0.219	0.656	0.368	0.632	0	0	1	0
											1	0	0	0	1	0	0	1	0	1	0	0
											0	1	0	1	0	0	1	0	0	0.778	0.222	0
											0.545	0.227	0.227	0	1	0	0.13	0.261	0.609	0	1	0
											1	0	0	0	1	0				0	0	1
											0.25	0.75	0	0.091	0.667	0.242	0.5	0.5	0	0	0	1
											0	1	0	0.739	0.261	0	0	0.222	0.778	0	1	0
											1	0	0	0	1	0	0	1	0	0	1	0
											1	0	0	0.27	0.541	0.189	1	0	0	1	0	0
											1	0	0	0	0.105	0.895	0.207	0.793	0	0	0	1
											0	0.727	0.273	1	0	0	0	0.477	0.523	0	0	1
											0	1	0	0	0	1	1	0	0
											0.881	0	0.119	0	1	0	0	0.548	0.452	0.126	0.874	0
											0	0.462	0.538	1	0	0	0.689	0.311	0	0.279	0.251	0.469
											0.17	0.101	0.729	0	1	0	1	0	0	0.092	0	0.908
											0.538	0	0.462	1	0	0	0.633	0.089	0.278	0.202	0.095	0.704
											1	0	0	0.165	0.353	0.481	1	0	0
											0	1	0	0.507	0.155	0.338	0.111	0	0.889	0.593	0.198	0.209
											1	0	0	0.065	0	0.935	0.95	0	0.05	0.125	0.054	0.821
											0	1	0	1	0	0	0.267	0.333	0.4	0.02	0.077	0.903
											1	0	0	0.4	0.6	0	1	0	0	0.846	0	0.154
											0	1	0	0	1	0	1	0	0	0.343	0.596	0.061
											0	1	0	1	0	0	0.25	0.75	0	0	1	0
											0.12	0.18	0.7	0	1	0	0.459	0.541	0	0	1	0
											0.132	0.132	0.737	1	0	0	0	1	0	0	1	0
											0.5	0.5	0	1	0	0	0.156	0.089	0.756	0	1	0
											0.273	0.091	0.636	1	0	0	0	1	0	0	1	0
											1	0	0	0	1	0	0.237	0.322	0.441	0	0.355	0.645
											1	0	0	0.346	0.654	0	0.727	0.273	0	0	0.058	0.942
											1	0	0	0	0	1	0.901	0.079	0.02	0	1	0
											1	0	0	0.083	0	0.917	0	1	0	0	1	0
											0.923	0	0.077	0	0	1	0	1	0	0	1	0
											0	0.643	0.357	0.1	0	0.9	0	1	0	0.483	0	0.517
											0.667	0.333	0	1	0	0	0	1	0	0	1	0
											0	0.167	0.833	1	0	0	0.034	0.222	0.744	0	1	0
											0	1	0	0	1	0	0	0.45	0.55	0	0.154	0.846
											1	0	0	0	1	0	1	0	0	0	0.316	0.684
											0	0.232	0.768	1	0	0	0.243	0.405	0.351	0	1	0
											0.161	0.625	0.214	1	0	0	1	0	0	1	0	0
											0	1	0	0.312	0.688	0	1	0	0	0	0	1
											0	1	0	0	1	0	0.273	0.182	0.545	0	0.899	0.101
											0	1	0	0	0	1	0	1	0	0	0	1
											0	1	0	0.3	0	0.7	0.048	0.029	0.924	0	0	1
											1	0	0	0	1	0	1	0	0	0	1	0
											1	0	0	0	1	0	0	1	0	0	0	1
											0.095	0.343	0.562	0	1	0	0	0	1	0	1	0
											0.596	0.253	0.151	0.45	0.55	0	0	1	0	0.167	0.481	0.352
											1	0	0	1	0	0	0.143	0	0.857	0.55	0.45	0
											0.838	0.162	0				0	0	1	0	1	0
											0	1	0	0.5	0.353	0.147	0	0	1	0	0	1
											0.69	0.31	0	1	0	0	0	0	1	0	0	1
											0.754	0.246	0	1	0	0	1	0	0	1	0	0
											1	0	0	0.901	0	0.099	1	0	0	0	0	1
											0.739	0.217	0.043	1	0	0	0	1	0	0.535	0.465	0
											1	0	0	0	0	1	1	0	0	0	0	1
											1	0	0	0.933	0	0.067	1	0	0	0	0.042	0.958
											0	0	1	1	0	0	1	0	0	0	0	1
											0.242	0.053	0.705	0	0	1	1	0	0	0	1	0
											0.046	0.292	0.662	1	0	0	1	0	0	0.16	0.56	0.28
											0.049	0.044	0.907	0	1	0	1	0	0	0	0.667	0.333
											0	1	0	1	0	0	0.526	0.474	0
											0	1	0	0.286	0.367	0.347	1	0	0	0.145	0.25	0.605
											0	1	0	0	0.878	0.122	0	1	0	0.173	0.759	0.068
											0	1	0	1	0	0	0	0	1	0.534	0.236	0.23
											0.08	0	0.92	1	0	0	0	1	0	0	0.073	0.927
											0	0	1	0	1	0	0.2	0.629	0.171	0.029	0.052	0.919
											0	1	0	0	0.192	0.808	1	0	0	0	1	0
											0.571	0.429	0	0.385	0.615	0	0	1	0	0	1	0
											0	1	0	1	0	0	0	0.5	0.5	0.778	0.222	0
											0.358	0.528	0.113	0	0	1	0	0.636	0.364	1	0	0
											1	0	0	1	0	0	1	0	0	1	0	0
											1	0	0	0.543	0	0.457	0	1	0	0.793	0.207	0
											1	0	0	0	0.13	0.87	0.229	0.629	0.143	0	0	1
											1	0	0	0	0	1	0.518	0.482	0	0	0	1
											0	1	0	0.138	0.231	0.631	0.529	0.471	0	0	0.085	0.915
											1	0	0	0	0.208	0.792	0.08	0.29	0.63	0	0	1
											0	1	0	1	0	0	0	0	1	0	0	1
											0.202	0.157	0.64	0	0	1	0	1	0	0.643	0.357	0
											0.5	0.5	0	0.218	0.218	0.563	1	0	0	0.269	0.423	0.308
											0	0.238	0.762	0	0	1	0	1	0	0	1	0
											1	0	0	1	0	0	1	0	0	1	0	0
											1	0	0	0	0	1	0	1	0	0	0	1
											0	1	0	0	0	1	0	1	0	1	0	0
											0	1	0				0	1	0	0	0	1
											0	1	0	0	1	0	0.03	0.116	0.854	1	0	0
											0.312	0	0.688	0	0	1	0.441	0.559	0	0	1	0
											0	0	1	0.049	0.098	0.854	0.5	0	0.5	1	0	0
											0.134	0.149	0.716				0	1	0
											1	0	0	0	1	0	0.893	0	0.107	1	0	0
											0	1	0	1	0	0	0	1	0	0.541	0	0.459
											1	0	0	0	1	0	1	0	0	0.079	0	0.921
											0.467	0.367	0.167	0	1	0	0	0	1	0	0	1
											1	0	0	1	0	0	0.453	0.547	0	1	0	0
											0	0.324	0.676	0.68	0	0.32	1	0	0	1	0	0
											1	0	0	1	0	0	1	0	0	0	1	0
											0.146	0.393	0.461	0	0.6	0.4	1	0	0	0	0	1
											0	0	1	0	0.93	0.07	0	1	0	0	1	0
											1	0	0	0.329	0	0.671	0	1	0	0	0	1
											1	0	0	0	1	0	1	0	0	0	0	1
											0.426	0.574	0	1	0	0	0	1	0	0	0	1
											0.444	0.148	0.407	0	1	0	0	1	0	0	0	1
											1	0	0	0.833	0.167	0	0.081	0	0.919	0	0	1
											1	0	0	0	1	0	0.755	0.102	0.143	0	1	0
											0	1	0	0.394	0.211	0.394	0	1	0	0	0	1
											0.583	0	0.417	0	1	0	1	0	0
											0.033	0	0.967	1	0	0	0	0	1	0	1	0
											0	1	0	0.221	0.279	0.5	0.725	0.2	0.075	0	1	0
											1	0	0	0	1	0	1	0	0	0	1	0
											0.25	0.75	0	0.062	0.164	0.774	0.035	0.619	0.347	0	1	0
											0	1	0	1	0	0	0	0.919	0.081	0.492	0.508	0
											0	1	0	0	1	0	1	0	0	0.176	0	0.824
											0.261	0	0.739	0	0.25	0.75	0.167	0	0.833	1	0	0
											0	0	1	0	0.826	0.174	0.8	0	0.2	0	1	0
											1	0	0	1	0	0	1	0	0	1	0	0
											1	0	0	0.333	0.25	0.417	0	0.562	0.438
											1	0	0	0	1	0	1	0	0	0.355	0.645	0
														0.552	0	0.448	1	0	0	0	1	0
											0	0.146	0.854	1	0	0	0	1	0	0	1	0
											0.203	0.686	0.11	0	0.5	0.5	0	1	0	0.421	0.579	0
											0	0.816	0.184	0.129	0	0.871	0.58	0.275	0.145	0	1	0
											0	1	0	0.231	0.769	0	0.305	0	0.695	0	0.865	0.135
											0	1	0	1	0	0	0	1	0	0	1	0
											0	1	0	0.304	0	0.696	0.44	0.56	0	0.209	0.507	0.284
											0.209	0.2	0.591	0.28	0.48	0.24	0.457	0.543	0	0	0.947	0.053
											0	0	1	0	0.769	0.231	0	1	0	0	1	0
											0.439	0.561	0	0.06	0.269	0.672	0	1	0	0	0	1
											0	1	0	0	1	0	1	0	0	0	0.425	0.575
											0.023	0.067	0.91	0.146	0.18	0.674	0.647	0.176	0.176	1	0	0
											0.1	0.155	0.745	0	0.805	0.195	0.492	0.069	0.438	0	0	1
											0	1	0	1	0	0	0	1	0	0	0	1
											0	1	0	0.06	0.162	0.778	0	0	1	0	0	1
											0	0	1	0	0	1	1	0	0	1	0	0
											1	0	0	0.5	0.136	0.364	0.897	0.103	0
											0.381	0	0.619	0	0.302	0.698	0	0	1	0.074	0.078	0.849
											0	0	1	0	0.907	0.093	0.244	0.122	0.634	0	0.9	0.1
											0.331	0	0.669	0.541	0.459	0	0.127	0.204	0.669	0.153	0.171	0.676
											1	0	0	0	1	0	0.12	0.88	0	1	0	0
											1	0	0	0	1	0	0	1	0
														0.273	0.345	0.382	1	0	0	0.026	0.128	0.846
											0	0.818	0.182	0	1	0	0	1	0	0	1	0
											0.902	0	0.098	0	1	0	0.104	0.896	0	0.369	0	0.631
											0	0.082	0.918	1	0	0	0.143	0.714	0.143	0.067	0.049	0.885
											0.361	0.108	0.53	0	1	0	0	1	0	1	0	0
											0.051	0	0.949	0	0.8	0.2	0	1	0	1	0	0
											0	1	0	1	0	0	0.588	0.412	0	0.161	0	0.839
											1	0	0	1	0	0	1	0	0	0.648	0	0.352
											0	0.316	0.684	0.255	0.676	0.069	1	0	0	0.033	0.967	0
											0	0.867	0.133	1	0	0	1	0	0	0	0	1
											0	0.36	0.64	1	0	0	0.724	0	0.276	0	0	1
											0.375	0	0.625	0	1	0	0	0.308	0.692	0	1	0
											1	0	0	0	0	1	0.556	0	0.444	0	1	0
											0.141	0.087	0.772	1	0	0	1	0	0
											0	0.32	0.68	0	0.167	0.833	1	0	0	0.178	0.347	0.475
											0	0	1	0	0.308	0.692	0	1	0	1	0	0
											0	0	1	0	1	0	0.682	0.318	0	1	0	0
											0.429	0.371	0.2	0	1	0	0.222	0	0.778	1	0	0
											0.086	0.336	0.578	0	1	0	0.727	0.273	0	0	1	0
											0.159	0	0.841	0.773	0.227	0	0	0	1	0.681	0	0.319
											0	0.119	0.881	0.379	0.621	0	1	0	0	0	0	1
											0	0	1	0	0	1	0.127	0.049	0.824	0	0	1
											0	0	1	0	0	1	0	1	0	1	0	0
											0.571	0	0.429	0.478	0	0.522	0	0.5	0.5	0.489	0	0.511
											0	1	0	0.684	0.316	0	0	1	0	0	0	1
											1	0	0	0.578	0	0.422	1	0	0	0	0.173	0.827
														0.742	0.258	0	0	0.176	0.824	0.526	0.474	0
											0	1	0	0.72	0.28	0	0	1	0	0	0	1
											0.5	0.5	0	0	1	0	0	1	0	0.03	0.041	0.93
											0	1	0	0.389	0.167	0.444	0.619	0.381	0	0	0	1
											0	1	0	0	0	1	0.6	0	0.4	0	0.579	0.421
											0	1	0	1	0	0	1	0	0	0	0	1
											0.086	0.193	0.722	0.516	0.22	0.264	0	1	0	0	1	0
											1	0	0	0.263	0.211	0.526	0	0.061	0.939
											0	1	0	1	0	0	0.072	0.058	0.87	0.083	0.917	0
											1	0	0	1	0	0	1	0	0	0.129	0.206	0.665
											0	1	0	0	1	0	0	1	0	0.171	0.257	0.571
											0.359	0.562	0.078				0.704	0.296	0	0	0	1
											0	1	0				0	1	0	0.233	0.085	0.682
											0	1	0				0	1	0	0.227	0	0.773
											0	1	0				1	0	0	1	0	0
											0.278	0.722	0				0.35	0.65	0	0.166	0.117	0.717
																	0	1	0	0.208	0	0.792
											0	1	0				1	0	0	0.116	0	0.884
											0	1	0				1	0	0	0.07	0.055	0.875
											0	0.382	0.618				1	0	0	0.37	0	0.63
											0	0.762	0.238				1	0	0	0.8	0.2	0
											0	1	0				1	0	0	0	1	0
											0	0.743	0.257				0	0	1	0.133	0	0.867
											0	0.873	0.127				0.353	0.265	0.382	1	0	0
											0	0.041	0.959				0	1	0	1	0	0
											0	1	0							1	0	0
											0	1	0				1	0	0	0	0	1
											0.625	0.375	0				0	1	0	0	0	1
											1	0	0				0.154	0.785	0.06	0	0	1
											0.139	0.035	0.826				0	0.898	0.102	0	0.464	0.536
											0	0.083	0.917				0.125	0.169	0.706	0	0	1
											0	0	1				0.396	0.271	0.333	0	0.021	0.979
											1	0	0				0	0.903	0.097	0	0	1
											1	0	0				0	0.882	0.118	0	0.308	0.692
											0.022	0.013	0.965				0	1	0
											0	0	1				0	0.966	0.034	0.083	0.321	0.596
											0.029	0.116	0.855				0.375	0.625	0	0.105	0.154	0.741
											0	0	1				0	1	0	0	0	1
											0	1	0				0	1	0	0.744	0.103	0.154
											0.358	0	0.642				0.615	0.385	0	0.778	0.222	0
																	1	0	0	0	0.768	0.232
											0.34	0.173	0.487				0.544	0.053	0.404	0	0	1
											0	1	0				0.659	0	0.341	0	0	1
											0.911	0	0.089				0.396	0	0.604	0	0	1
											0	1	0				0.316	0.526	0.158	0	0	1
											0.069	0.105	0.826				0.409	0.5	0.091	0	0	1
											0	1	0				0.462	0.538	0	0	0	1
											0.423	0.577	0				0.542	0.458	0	0	0	1
											1	0	0				1	0	0	0	0	1
											0	0.377	0.623				0	1	0	1	0	0
											0.5	0.138	0.362				1	0	0	1	0	0
											0.19	0	0.81				0.289	0	0.711	1	0	0
											0	0.306	0.694				1	0	0	0.577	0.423	0
																	0	1	0	0	0	1
											1	0	0				0	1	0	1	0	0
											0	1	0				0	1	0
											1	0	0				1	0	0
											0.151	0.215	0.634				0.556	0.444	0
											0.361	0	0.639				0	0.722	0.278
											0.313	0.119	0.567				1	0	0
											0.556	0.444	0				0.184	0.112	0.703
											0.5	0.5	0				0	1	0
											0	1	0				1	0	0
											0.079	0.921	0				1	0	0
											0.783	0.109	0.109				0.468	0.097	0.435
											0	1	0				0.878	0	0.122
											0	0.548	0.452				0.769	0.231	0
											1	0	0				0	1	0
											0.722	0.167	0.111				0.175	0.533	0.292
											1	0	0				1	0	0
											1	0	0				0.231	0.051	0.718
											0	0.704	0.296				0.13	0.739	0.13
											0.074	0.206	0.721				0.123	0.591	0.286
											1	0	0				0.254	0.168	0.578
											1	0	0				0	1	0
											0.2	0.267	0.533				0	1	0
											0.854	0	0.146				1	0	0
											1	0	0				0	1	0
											0	1	0				0	1	0
											1	0	0				0	1	0
											1	0	0				0	1	0
											0.222	0	0.778				1	0	0
											0	1	0				0	1	0
											0.887	0	0.113				0	1	0
											1	0	0				0	1	0
											0.115	0.344	0.542				0	1	0
											0.182	0.273	0.545				1	0	0
											0	0.457	0.543				0.912	0	0.088
											0.474	0.526	0				0	1	0
											0.312	0	0.688				0.24	0.05	0.71
											0	1	0				0.154	0	0.846
											0.842	0	0.158				1	0	0
											0.171	0	0.829				1	0	0
											0.765	0	0.235				0	1	0
											0.824	0	0.176				1	0	0
											0.577	0.192	0.231				1	0	0
											0	1	0				0.741	0	0.259
											1	0	0				0	1	0
											0	1	0				1	0	0
											1	0	0				0	1	0
											0	1	0				0.596	0	0.404
											0.312	0.375	0.312				0	1	0
											1	0	0				0	1	0
											1	0	0				0	0	1
											0	1	0				0	1	0
											1	0	0				0.83	0	0.17
											1	0	0				0	0	1
											0.684	0	0.316				1	0	0
											1	0	0				0	1	0
											0.667	0	0.333				0	0	1
											1	0	0				0	1	0
											0	1	0				0	1	0
											0	1	0				0	1	0
											0	1	0				0	1	0
											0.145	0.043	0.812				0.5	0.5	0
											1	0	0				0	1	0
											1	0	0				0.526	0.474	0
											1	0	0				1	0	0
											0	1	0				0.55	0.411	0.039
											1	0	0				0	1	0
											1	0	0				0	1	0
											0.214	0.786	0				1	0	0
											1	0	0				0	1	0
											0	1	0				0	0.118	0.882
											0	1	0				1	0	0
											1	0	0				0	1	0
											0	1	0				0	1	0
											0	0.583	0.417				1	0	0
											1	0	0				0.105	0.386	0.509
											1	0	0				0	1	0
											0	1	0				0.176	0.824	0
											0	0.711	0.289				0.081	0.027	0.892
											0	1	0				0	1	0
											0	1	0				1	0	0
											1	0	0				0.175	0.533	0.292
											1	0	0				0	1	0
											0	1	0				0	1	0
											1	0	0				1	0	0
											0	1	0				0.692	0.308	0
											1	0	0				0.043	0.304	0.652
											0.556	0.167	0.278				0	1	0
											1	0	0				0.209	0.22	0.571
											0.146	0.854	0				0	0	1
											0.165	0.071	0.765				0	0	1
											0	1	0				0.429	0.071	0.5
											1	0	0				1	0	0
											0	1	0				0	1	0
											0.238	0.762	0				0.694	0.235	0.071
											0	0.386	0.614				1	0	0
											1	0	0				0.571	0.429	0
											0	1	0				1	0	0
											1	0	0				0	1	0
											0	1	0				0.444	0	0.556
											0	1	0				0	0	1
											0	1	0				0	0.868	0.132
											1	0	0				0	1	0
											1	0	0				0	1	0
											0	1	0				0	1	0
											0	0.148	0.852				0	1	0
											1	0	0				0.312	0.531	0.156
											1	0	0				0	1	0
											0	1	0				0.111	0.889	0
											0	1	0				0	1	0
											1	0	0				0	1	0
											0.619	0	0.381				0	1	0
											1	0	0				0.152	0.848	0
											0	0	1				0	1	0
											0.047	0.184	0.769				0.697	0.303	0
											1	0	0				0	0.636	0.364
											0.153	0.288	0.559				0	1	0
											0	1	0				0.643	0	0.357
											0	1	0				1	0	0
											0.319	0	0.681				0	0	1
											0.073	0.39	0.537				0	1	0
											0	1	0				0	1	0
											1	0	0				0	1	0
											1	0	0				0	1	0
											0.233	0.4	0.367				0.484	0.516	0
											1	0	0				1	0	0
											0	1	0				0.081	0.372	0.547
											0	0.036	0.964				0	0.528	0.472
											0	0	1				0	1	0
											0.433	0	0.567				1	0	0
											1	0	0				1	0	0
											0.621	0	0.379				0	1	0
											0	1	0				0	0.667	0.333
											0	1	0				0	1	0
											1	0	0				0.222	0.278	0.5
											0	1	0				0.203	0.101	0.696
											0.8	0.2	0				0.6	0	0.4
											0	1	0				0	0.16	0.84
											0	0.256	0.744				1	0	0
											0.136	0.098	0.765				0.837	0	0.163
											0.192	0.077	0.731				0	1	0
											0.5	0	0.5				1	0	0
											0.75	0.25	0				0	1	0
											1	0	0				0	1	0
											0	0	1				0	0	1
											0	0	1				0	0	1
											0.676	0.324	0				0	0	1
											0	1	0				0.533	0.467	0
											0	1	0				0	0.064	0.936
											0.4	0.6	0				0	1	0
											0	1	0				1	0	0
											0.111	0	0.889				0	0.147	0.853
											1	0	0				0	1	0
											1	0	0				0	0	1
											1	0	0				1	0	0
											0.455	0	0.545				1	0	0
											0.227	0	0.773				0	1	0
											0	1	0				0	1	0
											0.178	0.153	0.669				1	0	0
											0.136	0.439	0.424				0	0	1
											0	1	0				0	0	1
											0.417	0.583	0				0	1	0
											1	0	0				1	0	0
											0.381	0	0.619				0	0	1
											1	0	0				0	0.471	0.529
											0	1	0				1	0	0
											0	0.143	0.857				0.152	0.364	0.485
											1	0	0				0.214	0	0.786
											0	1	0				0.556	0.444	0
											1	0	0				0	1	0
											1	0	0				1	0	0
											0.731	0	0.269				0.583	0.417	0
											0.5	0.5	0				1	0	0
											0	1	0				1	0	0
																	0.62	0.28	0.1
											0	1	0				0.425	0.05	0.525
											0	0.608	0.392				0	1	0
											0.167	0.691	0.142				0	1	0
											0	0.785	0.215				0.5	0.5	0
											0.024	0.024	0.951				0	1	0
											0.233	0.315	0.452				1	0	0
											0	0	1				1	0	0
											1	0	0				0	1	0
											0	1	0				0.185	0	0.815
											0	0.45	0.55				0	0	1
											0	0	1				0	0.667	0.333
											1	0	0				0	0.667	0.333
											0	0	1				0.9	0.1	0
											0	0.424	0.576				0.278	0.722	0
											0.343	0	0.657				0	1	0
											0.36	0	0.64				0.545	0	0.455
											0.63	0	0.37				0	0	1
											0	0	1				1	0	0
											0	0	1				0	1	0
											0	1	0				0	0	1
											0	0	1				1	0	0
											0	0	1				0	1	0
											1	0	0				0	0.148	0.852
											0.061	0.015	0.924				0	1	0
											0	1	0				0	1	0
											1	0	0				0	0	1
											0	0	1				0	1	0
											0.407	0	0.593				0.478	0.261	0.261
											0.25	0	0.75				1	0	0
											0.047	0.116	0.837				0	0.214	0.786
											0.229	0	0.771				0.364	0	0.636
											1	0	0
											0.222	0.111	0.667				0	1	0
																	0.265	0.408	0.327
											0.761	0.017	0.222				0.691	0.309	0
											1	0	0				0.585	0.415	0
											1	0	0				0.529	0	0.471
											0.512	0.317	0.171				0	0.831	0.169
											0.148	0.148	0.704				0.568	0	0.432
											0.08	0.148	0.773				1	0	0
											0.15	0.85	0				1	0	0
											0	1	0				0.241	0.703	0.055
											0	1	0				0	1	0
											0.453	0.132	0.415				0	0.688	0.312
											0.434	0	0.566				0	0.225	0.775
											0.37	0.13	0.5				0	1	0
											0.405	0.27	0.324				0	1	0
											0	1	0				0.438	0.516	0.047
											1	0	0				0.032	0.269	0.699
											0	1	0				0	1	0
											0	0.389	0.611				0	1	0
											0	0	1				0	1	0
											0.333	0.667	0				0.704	0	0.296
											0	1	0				1	0	0
											0.053	0.083	0.864				0	0.204	0.796
											1	0	0				0	1	0
											0	0	1				0	1	0
											0.157	0	0.843				0.051	0.949	0
											0.118	0.033	0.849				0.152	0.385	0.463
											0.286	0.089	0.625				0	1	0
											0.068	0	0.932				0.307	0.173	0.52
											1	0	0				0	1	0
											0.103	0.052	0.845				0	1	0
											0	0	1				0.031	0.062	0.908
											0	0	1				0	1	0
											0.2	0.043	0.757				1	0	0
											0	0	1				0	0	1
											0	0	1				0	1	0
											0	0	1				0	1	0
											1	0	0				0.762	0.238	0
																	0	1	0
											0	0.938	0.062				0	1	0
											0	0.935	0.065				0	1	0
											0	1	0				0	0	1
											0.13	0.261	0.609				0	0.208	0.792
											0	0.902	0.098				1	0	0
											0.667	0.196	0.137				0	1	0
											1	0	0				0	0	1
											0	1	0				0	0.909	0.091
											0	0.821	0.179				0.058	0.348	0.594
											1	0	0				0	1	0
											1	0	0				1	0	0
											0	1	0				0.25	0.264	0.486
											0	1	0				1	0	0
											0.2	0.36	0.44				0	1	0
											0	1	0				0	0.66	0.34
											1	0	0				0	1	0
											1	0	0				0	0	1
											0	1	0				0	0.393	0.607
											0	1	0				0	0	1
											0	1	0				1	0	0
											1	0	0				0	0.261	0.739
											0.444	0.556	0				0.516	0.484	0
											1	0	0				0	0.437	0.563
											0	1	0				0.153	0.722	0.125
											0	0.875	0.125				0.054	0.946	0
											0	1	0				0.266	0.582	0.152
											1	0	0				0	1	0
											0.263	0.737	0				0.303	0	0.697
											0.385	0.385	0.231				0	0	1
											0	1	0				0.06	0.143	0.798
											0	0.414	0.586				0	0	1
											0	1	0				1	0	0
											0.232	0.536	0.232				0.37	0.63	0
											0	1	0				0	1	0
											0.417	0.583	0				0.714	0.286	0
											0.4	0.6	0				0	1	0
											0.636	0.364	0				0	1	0
											0.842	0.158	0				0	1	0
											0	1	0				0	1	0
											0	1	0				0.243	0.081	0.676
											0	1	0				0	1	0
											0.107	0.893	0				0	0.816	0.184
											1	0	0				0	1	0
											0	1	0				0	0	1
											0.025	0.125	0.85				0.405	0	0.595
											0.029	0.158	0.813				0.562	0.438	0
											1	0	0				0.04	0.96	0
											0	1	0				0	0	1
											0	1	0				0.409	0.409	0.182
											1	0	0				0	1	0
											0	0.295	0.705				1	0	0
											0	0.643	0.357				1	0	0
											0	1	0				0.226	0	0.774
											0	1	0				0	0.65	0.35
											0.125	0	0.875				0	1	0
											0	0.737	0.263				1	0	0
											0	1	0				0.417	0.583	0
											0	1	0				1	0	0
											1	0	0				0	0.131	0.869
											0	1	0				0	1	0
											0.028	0.318	0.654				0.5	0.5	0
											1	0	0				0	1	0
											0	1	0				0.25	0.75	0
											0.727	0.273	0				1	0	0
											0	1	0
											0	1	0				0	0.149	0.851
											0.373	0	0.627				0.323	0.677	0
											0	1	0				0	1	0
											0	1	0				0	1	0
											0	1	0				1	0	0
											0	0.833	0.167				0.865	0	0.135
											1	0	0				0.556	0	0.444
											0.417	0	0.583				0.03	0	0.97
											0	1	0				0.132	0.023	0.845
											1	0	0				0	1	0
											1	0	0				0.155	0.3	0.545
											1	0	0				0.179	0.126	0.695
											0	1	0				1	0	0
											1	0	0				0	1	0
											0	1	0				0	1	0
											0	1	0				1	0	0
											1	0	0				1	0	0
											1	0	0				0	0.667	0.333
											0	1	0				0	1	0
											0.25	0.75	0				0.057	0.471	0.471
											0.843	0	0.157				0	1	0
											0.268	0	0.732				0	1	0
											0.429	0.321	0.25				0	1	0
											1	0	0				0.531	0.075	0.394
											1	0	0				0.091	0.792	0.117
											0.714	0.286	0				1	0	0
											0	1	0				0	0.938	0.062
											1	0	0				0	1	0
											0	0.625	0.375				0.262	0.738	0
											1	0	0				0.4	0	0.6
											1	0	0				0.289	0	0.711
											0	1	0				0	0.124	0.876
											0	1	0				0	1	0
											0	1	0				0	1	0
											0.472	0.075	0.453				0	1	0
											1	0	0				0	0.778	0.222
											0.65	0	0.35				0	1	0
											0	1	0				1	0	0
											1	0	0				0.581	0.419	0
											0	1	0				0	0.314	0.686
											1	0	0				0	0.721	0.279
											0.545	0.455	0				0.222	0.63	0.148
											0.625	0	0.375				0	0	1
											1	0	0				0.155	0.767	0.078
											0	1	0				0	1	0
											1	0	0				0.443	0	0.557
											1	0	0				1	0	0
											0	1	0				0	0.956	0.044
											1	0	0				0	1	0
											0.75	0.25	0				0.024	0.819	0.157
											0.088	0.186	0.726				0.095	0.905	0
											1	0	0				0	0.946	0.054
											1	0	0				1	0	0
											0	1	0				0	1	0
											0	1	0				0.089	0.085	0.826
											0.312	0.312	0.377				0	0.043	0.957
											1	0	0				0	1	0
											0	1	0				0.209	0.756	0.035
											0	1	0				0	1	0
											0	1	0				0	1	0
											0	1	0				0	0.933	0.067
											0	1	0				0.407	0.593	0
											0	1	0				0	1	0
											0.75	0	0.25				0.637	0	0.363
											1	0	0				0	0.217	0.783
											1	0	0				0.444	0.407	0.148
											0.235	0	0.765				1	0	0
											1	0	0				0	1	0
											0	0.116	0.884				0	0.165	0.835
											0	0.235	0.765				1	0	0
											0	1	0				0	0.758	0.242
											0	1	0				0	1	0
											0	1	0				0	0.069	0.931
											0	1	0				0	1	0
											0	1	0				0.672	0.094	0.234
											0.625	0.208	0.167				0.037	0	0.963
											0.304	0.413	0.283				0.486	0.432	0.081
											1	0	0				1	0	0
											0	1	0				1	0	0
											0.13	0.652	0.217				1	0	0
											0.139	0.611	0.25				1	0	0
											0	0	1				0	1	0
											0	0	1				0.46	0	0.54
											1	0	0				0.32	0.68	0
											0	1	0				0	1	0
											0.556	0.444	0				0	0.76	0.24
											1	0	0				0.144	0.15	0.705
											1	0	0				0.233	0.567	0.2
											0	0	1				0	0	1
											0	1	0				0	1	0
											0.065	0.047	0.888				1	0	0
											1	0	0				0	1	0
											0.196	0.804	0				0.231	0.769	0
											0.714	0	0.286				0	1	0
											0	1	0				0.421	0	0.579
											0.142	0.025	0.833				0	1	0
											0.226	0.043	0.731				0	0	1
											1	0	0				1	0	0
											0	1	0				0	1	0
											1	0	0				0	1	0
											0	1	0				1	0	0
											0	0.7	0.3				0.228	0	0.772
											1	0	0				0.841	0	0.159
											1	0	0				0	1	0
											1	0	0				0.036	0.607	0.357
											0	0.211	0.789				1	0	0
											0	1	0				1	0	0
											0	1	0				0.091	0.036	0.873
											1	0	0				0	1	0
											1	0	0				0	1	0
											1	0	0				0	1	0
											0	0	1				0.206	0	0.794
											0	1	0				0.5	0.5	0
											0.162	0.145	0.692				0.667	0.333	0
											0	1	0				0	1	0
											1	0	0				0	1	0
											0.571	0.429	0				1	0	0
											1	0	0				0.254	0.507	0.239
											0	1	0				0	1	0
											1	0	0				1	0	0
											1	0	0				0	0	1
											0	0	1				0	1	0
											0.32	0	0.68				1	0	0
											0	0	1				1	0	0
											0.579	0.421	0				0	0.793	0.207
											0	1	0				1	0	0
											1	0	0				1	0	0
											1	0	0				0	1	0
											0.25	0	0.75				0	0	1
											1	0	0				0.571	0.429	0
											0	1	0				0.5	0.5	0
											1	0	0				0	1	0
											0.147	0	0.853				1	0	0
											0	1	0				0	1	0
											0	1	0				0	0	1
											0	1	0				0	1	0
																	0.452	0.306	0.242
											0.885	0	0.115				0.095	0.667	0.238
											0	1	0	0.028	0.081	0.892	0	1	0
											0	0.811	0.189	1	0	0	0.468	0.532	0
											0	0.827	0.173	0.118	0.882	0	0	1	0
											0.611	0.389	0	0.012	0.076	0.912	0	0.753	0.247
											1	0	0	0.197	0.416	0.387	0.092	0.122	0.786
											0.29	0.129	0.581	0.119	0.113	0.768	1	0	0
											0.087	0.391	0.522	0.375	0.625	0	0	1	0
											0	0	1	0	0.381	0.619	0	1	0
											0	0	1	1	0	0	0	1	0
														1	0	0	0	1	0
														0	0.556	0.444	1	0	0
														1	0	0	0	1	0
														0	0.854	0.146	0	1	0
											0.227	0.364	0.409	0.25	0.583	0.167	0	1	0
											0.125	0.792	0.083	0.17	0.511	0.319	0.079	0.831	0.09
											0.173	0.567	0.26	0	0.811	0.189	0	0	1
											0.421	0.488	0.091	0.621	0.241	0.138	0	1	0
											0.6	0.4	0	0.633	0.367	0	0	1	0
											0.235	0.199	0.566	0.049	0.341	0.61	1	0	0
											0	0.815	0.185	0.15	0.5	0.35	1	0	0
											0.722	0.134	0.144	0.667	0.333	0	1	0	0
											0	0	1	0	0.759	0.241	0	1	0
											0	0	1	0	1	0	1	0	0
											0.218	0	0.782	0.447	0.263	0.289	0	0	1
											0	1	0	0.529	0.324	0.147	1	0	0
											0	1	0	0.087	0.797	0.116	0.953	0.047	0
											1	0	0	0.577	0.231	0.192	0	1	0
											0.295	0.357	0.349	0	1	0	0	0.091	0.909
											0.032	0.021	0.947	0	1	0	0	0	1
											0	1	0	0	0	1	0	1	0
											0	0	1	1	0	0	0.2	0.145	0.655
											0.6	0.4	0	1	0	0	0	0.859	0.141
											0.453	0	0.547	1	0	0	0	1	0
											0.429	0.571	0	0.333	0.667	0	1	0	0
											0.037	0.617	0.346	0.286	0.571	0.143	0	1	0
											1	0	0	0	0.188	0.813	0	1	0
											0	1	0	0	1	0	0	1	0
											0	0	1	0.725	0	0.275	0.444	0.556	0
											1	0	0	0	0	1	0.081	0	0.919
											0	0	1	0.889	0	0.111	0	1	0
											0.533	0	0.467	0.765	0	0.235	0.324	0.324	0.352
											0.057	0	0.943	0.267	0.733	0	0	0.361	0.639
											0	1	0	0.175	0.175	0.65	0.109	0.244	0.647
											0	1	0	0.136	0.528	0.336	0.667	0	0.333
											1	0	0	0.633	0.367	0	0	0	1
											0.017	0.031	0.951	0	0.39	0.61	0.538	0.462	0
											0	0.632	0.368	0	1	0	0.284	0.716	0
											1	0	0	0.129	0	0.871	0	0.067	0.933
											1	0	0	0.537	0.122	0.341	0	0	1
											0.037	0.025	0.938	0	1	0	0	1	0
											0	0	1	0.667	0	0.333	0	1	0
											0.02	0	0.98	1	0	0	0	1	0
											1	0	0	0	0	1	0	1	0
											0.5	0.5	0	0.353	0	0.647	0.5	0	0.5
											0	0	1	0.034	0.252	0.714	0	1	0
											0.067	0.833	0.1	0	1	0	0.278	0.333	0.389
											0	0	1	0	1	0	0.25	0.75	0
											1	0	0	0	1	0	0	0	1
											0.349	0	0.651	0.667	0.333	0	0.429	0.571	0
											0.333	0.5	0.167	0	1	0	0	1	0
											0	1	0	0.128	0	0.872	0	1	0
											0	0.543	0.457				0	1	0
											1	0	0	0	1	0	0	1	0
											0.174	0	0.826	1	0	0	1	0	0
											0	1	0	0.206	0.147	0.647	0	0	1
											0	0	1	0.15	0.113	0.738	0	1	0
											1	0	0	0	0.894	0.106	0	1	0
											0	1	0	0	1	0	0	1	0
											0	1	0	0.787	0.17	0.043	0.062	0.938	0
											1	0	0	0	0.881	0.119	0	0	1
											1	0	0	0.925	0	0.075	0	1	0
											0.625	0.375	0	0.143	0.857	0	0.409	0.591	0
											0	1	0	0	1	0	0.267	0.733	0
														0	0.882	0.118	1	0	0
											1	0	0	0.75	0	0.25	0	1	0
											0.92	0	0.08	1	0	0	0	1	0
											0.053	0.88	0.067	1	0	0	0	1	0
											0	1	0	0	1	0	0	1	0
											0	1	0	0.105	0.289	0.605	1	0	0
											0	1	0	0.267	0.733	0	0.286	0.321	0.393
											1	0	0	0.643	0	0.357	0	1	0
											0.448	0.552	0	0	0	1	0	0.5	0.5
											1	0	0	0.333	0.667	0	0	1	0
											0.462	0.538	0	0	1	0	0	1	0
											0	1	0	0.4	0.4	0.2	1	0	0
											0.623	0	0.377	0	1	0	1	0	0
											0.944	0.056	0	0.842	0	0.158
											0	1	0	1	0	0	1	0	0
											0	1	0	1	0	0	0.086	0.914	0
											0	1	0	0.444	0.556	0	0.113	0.887	0
											0	0.237	0.763	0.333	0.476	0.19	0	0.815	0.185
											0	0.673	0.327	0	0.312	0.687	0.051	0.75	0.199
											1	0	0	0	1	0	1	0	0
											0	0.784	0.216	0	1	0	1	0	0
											0.714	0	0.286	0.381	0.048	0.571	0.31	0	0.69
											1	0	0	0.075	0.075	0.849	0	1	0
											1	0	0	0.121	0	0.879	0	0.145	0.855
											0	0.417	0.583	0.258	0.194	0.548	0.539	0.461	0
											1	0	0	0	1	0	0.45	0.062	0.488
											0	1	0	1	0	0	0.241	0.759	0
											1	0	0	0	0.6	0.4	0.936	0	0.064
											1	0	0	0.273	0.182	0.545	0.476	0.143	0.381
											1	0	0	0	1	0	0	1	0
											1	0	0	0	0.867	0.133	0.794	0.206	0
											0.11	0.047	0.843	0	0.682	0.318	0.287	0.545	0.169
											0.08	0.085	0.836	1	0	0	1	0	0
											0.142	0	0.858	0	1	0	1	0	0
											0	1	0	0	1	0	0	0	1
											1	0	0	0	1	0	0.06	0.48	0.46
											1	0	0	0.191	0.809	0	0	0.938	0.062
											1	0	0	1	0	0	0.327	0.673	0
											0	1	0	0	0	1	0	1	0
											0.084	0.15	0.766	0.174	0	0.826	0	1	0
											0	1	0	0	1	0	0	1	0
											1	0	0	0.195	0	0.805	0	0.941	0.059
											1	0	0	0	0	1	1	0	0
											1	0	0	0	0	1	0	1	0
											0	1	0	0	0	1	0	1	0
											1	0	0	0.083	0.917	0	0.111	0	0.889
											0.523	0.295	0.182	1	0	0	0.126	0	0.874
											1	0	0	0.486	0	0.514	0.415	0.585	0
											0	1	0	0	0	1	0	1	0
											0	1	0	0	1	0	0.112	0.083	0.805
											0	1	0	0	0.897	0.103	0.413	0.053	0.534
											0	1	0	0	0	1	0	1	0
											1	0	0	0	1	0	0.29	0.258	0.452
											0.1	0.056	0.844	1	0	0	1	0	0
											1	0	0	0.2	0.8	0	0	0	1
											0.13	0.207	0.663	0	0.018	0.982	0	0.391	0.609
											1	0	0	0.375	0.352	0.273	0	1	0
											1	0	0	0.818	0	0.182	1	0	0
											0	1	0	0	0.774	0.226	0.731	0	0.269
											0	0.062	0.937	0.148	0.407	0.444	0	0	1
											0	0	1	0.5	0.174	0.326	1	0	0
											0	1	0	0.5	0	0.5	0	0.444	0.556
											0	1	0	0.143	0	0.857	0.049	0.102	0.849
											0.339	0.194	0.468	0	0.112	0.888	0	0.293	0.707
											0	1	0	1	0	0	0	0.719	0.281
											1	0	0	0.583	0.417	0	0	1	0
											1	0	0	1	0	0	1	0	0
											0.778	0.222	0	0.467	0	0.533	1	0	0
											0	0.692	0.308	1	0	0	1	0	0
											0.812	0.188	0	0.214	0.286	0.5	0	1	0
											1	0	0	0	1	0	0.212	0.207	0.581
											0	0.429	0.571	0	1	0	0	1	0
											0.438	0.312	0.25	1	0	0	0	1	0
											0.125	0.531	0.344	0.538	0	0.462	1	0	0
											0	1	0	0.706	0	0.294	1	0	0
											1	0	0	0	1	0	0	1	0
											0	1	0	0.647	0.353	0	0.048	0.952	0
											0.091	0.909	0	0	0	1	0.287	0	0.713
											0	1	0	0.267	0	0.733	1	0	0
											0.25	0.75	0	0.562	0.25	0.188	0.139	0.519	0.342
											0.09	0	0.91	0.302	0.535	0.163	0	1	0
											0	1	0	1	0	0	0.468	0.532	0
											1	0	0	0.444	0.556	0	0	0.727	0.273
											0	1	0	1	0	0	0	1	0
											1	0	0	0	0.588	0.412	0.189	0	0.811
											1	0	0	0.333	0	0.667	0	1	0
											0	1	0	0	1	0	0	0	1
											0	1	0	1	0	0	0	0	1
											1	0	0	0	0	1	0	1	0
											0	1	0	0	1	0	1	0	0
											0	1	0	0.194	0.806	0	1	0	0
											0.064	0.181	0.755	0	1	0	0.385	0	0.615
											1	0	0				0	1	0
											1	0	0	0.121	0.133	0.745	0	0	1
											1	0	0	0.182	0.13	0.688	0	0.812	0.188
											0.136	0.455	0.409	0	1	0	1	0	0
											0	1	0	0.706	0.294	0	1	0	0
											1	0	0	0.818	0	0.182	0	1	0
											0	0.423	0.577	1	0	0	0.435	0.478	0.087
											0	1	0	1	0	0	0	1	0
											0	1	0	0.136	0.271	0.593	1	0	0
											1	0	0	0	1	0	0.5	0	0.5
											0	0	1	1	0	0	1	0	0
											0	0.132	0.868	0	1	0	0	1	0
											1	0	0	0.622	0.378	0	0	0	1
											1	0	0	0.469	0.438	0.094	0	0	1
											1	0	0	0	1	0	0	0.241	0.759
											1	0	0	0	0.25	0.75	1	0	0
											1	0	0	1	0	0	0	0.324	0.676
											0	0.115	0.885	1	0	0	0	0.882	0.118
											1	0	0	1	0	0	0	1	0
											1	0	0	0	1	0	0	1	0
											0.273	0.136	0.591	1	0	0	0	0	1
											0.357	0.5	0.143	0.333	0.25	0.417	1	0	0
											0	0	1	0.514	0.071	0.414	0	0	1
											0	0	1	0	0.094	0.906	0.343	0.543	0.114
											0	0	1	1	0	0	1	0	0
											0.5	0	0.5	0	0	1	1	0	0
											0	0	1	0.039	0	0.961	0.412	0.588	0
											0.111	0.889	0	1	0	0	0	1	0
											0	1	0	0	1	0	0	1	0
											0.476	0.476	0.048	0.562	0.438	0	0	1	0
														0.093	0.791	0.116	0	0	1
											0	1	0	0	1	0	0	1	0
											0.247	0.438	0.315	0	1	0	1	0	0
											0.442	0.4	0.158	1	0	0	0.615	0	0.385
											0.943	0	0.057	0	1	0	0	0	1
											0.273	0.727	0	0	1	0	0	0	1
											0.205	0.591	0.205	0.088	0.119	0.794	0.17	0	0.83
											0.167	0.778	0.056	0	0	1	1	0	0
											0.455	0	0.545	0	0.068	0.932	0	1	0
											0.383	0.617	0	0	1	0	1	0	0
											0.02	0.034	0.946	0	1	0	0	0	1
											0	1	0	0.471	0.106	0.423	0.35	0.65	0
											0	1	0	1	0	0	1	0	0
											0	1	0	0	1	0	0.474	0	0.526
											0.3	0	0.7	1	0	0	0	0	1
											0	1	0	0	1	0	0.474	0.526	0
											0.519	0.37	0.111	0.036	0.143	0.821	0.258	0.742	0
											0	1	0	0.5	0.5	0	1	0	0
											0	1	0	1	0	0	0	0	1
											0.067	0.654	0.279	0.617	0	0.383	0.368	0	0.632
											0	1	0	1	0	0	0	1	0
											1	0	0	0.154	0.846	0	0	0	1
											0.714	0.095	0.19	0	1	0	0	1	0
											0.286	0.229	0.486	0	1	0	0	0	1
											0	0.833	0.167	0.206	0.706	0.088	1	0	0
											0	0.938	0.062	0	0.944	0.056	0.426	0.311	0.262
											0.667	0.333	0	0.714	0.071	0.214
											0	1	0	0	1	0	0	1	0
											1	0	0	0.276	0.103	0.621	0	1	0
											0	1	0	1	0	0	0.786	0	0.214
											0.455	0.545	0	0	1	0	0.133	0	0.867
											0.209	0.651	0.14	0	1	0	1	0	0
											0.659	0	0.341	0.412	0	0.588	0.066	0	0.934
											0	0.375	0.625	1	0	0	0.671	0	0.329
											0.333	0.667	0	0	1	0	0.489	0.511	0
											1	0	0	0.103	0	0.897	0.969	0	0.031
											1	0	0	1	0	0	0.952	0	0.048
											0.259	0.593	0.148	0	0	1	1	0	0
											0	1	0	0	0.077	0.923	0.727	0.273	0
											0.12	0.64	0.24	0	0.6	0.4	0	1	0
											0	1	0	0	1	0	0.174	0.826	0
											0	1	0	1	0	0	0	0.279	0.721
											1	0	0	0	1	0	0.081	0.838	0.081
											0.417	0.583	0	0.233	0	0.767	0.18	0.787	0.033
											0.043	0.391	0.565	0	0.098	0.902	0.096	0.08	0.824
											0.235	0.235	0.529	0.185	0.354	0.462	1	0	0
											0	1	0	0.419	0.226	0.355	0.019	0.26	0.721
											0.105	0.165	0.73	0.013	0.125	0.862	0	1	0
											0	1	0	0	0.226	0.774	0.643	0.261	0.096
											0.122	0.256	0.622	0.467	0.289	0.244	1	0	0
											0	1	0	0	1	0	0.833	0	0.167
											1	0	0	0.058	0.154	0.788	1	0	0
											0.204	0.593	0.204	0	0.071	0.929	0.182	0.184	0.634
											0.549	0.271	0.18	0	0.019	0.981	0	1	0
											0.422	0.133	0.444	0	0	1	0.16	0.056	0.784
											0.082	0.918	0	0	1	0	0.089	0.46	0.452
											0.75	0.25	0	0.429	0.476	0.095	1	0	0
											0.189	0.135	0.676	0.524	0.048	0.429	0.312	0.062	0.625
											0.235	0.765	0	0	1	0	0.439	0.451	0.11
											0	1	0	0.08	0.44	0.48	0.164	0	0.836
											0	0	1	0.636	0	0.364	0	0	1
											1	0	0	0.714	0	0.286	0	0.202	0.798
											0.265	0.588	0.147	0	1	0	0	0	1
											1	0	0	0.056	0.852	0.093	0	0	1
											0	0.893	0.107	1	0	0	1	0	0
											0	1	0	0	1	0	1	0	0
											1	0	0	0	1	0	0.168	0.649	0.183
											0.438	0.312	0.25	0	0	1	0	1	0
											1	0	0	0	1	0	0	1	0
											0	1	0	0	0.167	0.833	0	1	0
											1	0	0	0	1	0	0.967	0	0.033
											0	0	1	0.279	0	0.721	1	0	0
											0.417	0.056	0.528	0	1	0	0	1	0
											0.077	0.038	0.885	0	1	0	0.333	0.167	0.5
											0	0	1	1	0	0	0	0.903	0.097
											1	0	0	0.403	0.209	0.388	0.01	0.206	0.784
											1	0	0	0	1	0	0.638	0.216	0.147
											0	0.667	0.333	0	1	0	0.671	0	0.329
											1	0	0	0	0.186	0.814	0.083	0.057	0.86
											0	1	0	1	0	0	0.943	0	0.057
											0	0.5	0.5	0	0.773	0.227	0.284	0	0.716
											0.25	0.7	0.05	0	0	1	0.88	0.06	0.06
											0	1	0	0.304	0.13	0.565	0.841	0	0.159
											1	0	0	0.325	0.075	0.6	0	1	0
											0.059	0.292	0.648	0	1	0	0.167	0	0.833
											0	1	0	0.143	0.286	0.571	0.158	0.842	0
											0.147	0.328	0.526	0.438	0.562	0	1	0	0
											0	1	0				0	0.22	0.78
											0.647	0	0.353	0.234	0.22	0.546	0	1	0
											1	0	0	0	0.913	0.087	0	0.386	0.614
											1	0	0	0	0.408	0.592	0.086	0	0.914
											0.333	0.256	0.41	0	0.733	0.267	0.267	0.32	0.413
											0.567	0.183	0.25	0.054	0.071	0.875	0	1	0
											0.282	0.231	0.487	0	0.438	0.562	0	1	0
											0.149	0	0.851	0.277	0.255	0.468	0	1	0
											0	1	0	0	0.15	0.85	0.571	0	0.429
											0.909	0.091	0	0.25	0.75	0	0	1	0
											0.073	0.226	0.702	0	0	1	0	0.116	0.884
											0	0.353	0.647	0	0.081	0.919	0.132	0.079	0.789
											0	1	0	1	0	0	0	1	0
											0	1	0	0.116	0.136	0.747	0	0.127	0.873
											0	0.083	0.917	0.35	0.4	0.25	0	0.022	0.978
											0	1	0	0.113	0.186	0.701	0	0.054	0.946
											0	0.308	0.692	0.754	0.123	0.123	0	0	1
											0.5	0	0.5	0	0.917	0.083	0	0	1
											0	1	0	0.345	0	0.655	0	0.651	0.349
											0	1	0	0.2	0	0.8	0	1	0
											0.099	0.085	0.817	0	1	0	0.234	0.455	0.312
											0.273	0.182	0.545	1	0	0	0.524	0	0.476
											0	0	1	0	0.189	0.811	0	0.387	0.613
											0	0	1	0	0	1	0	0.359	0.641
											1	0	0	0	1	0	1	0	0
											0.6	0.4	0	0	0.078	0.922	0	0	1
											0	0.204	0.796	0.351	0.324	0.324	0.46	0.54	0
											0.571	0.429	0	0.054	0.292	0.655	0.581	0.419	0
											0	0.435	0.565	0.127	0.529	0.343	0.062	0.484	0.453
											0	0	1	0.385	0	0.615	0.248	0.101	0.651
											0.167	0	0.833	0	0	1	0.933	0.067	0
											0.16	0.28	0.56	0.471	0.235	0.294	0	1	0
											0.667	0.333	0	0	0	1	0.208	0.458	0.333
														0.176	0.176	0.647	0.447	0	0.553
											0	0.944	0.056	0	0	1	0	1	0
											0.455	0.545	0	0.105	0.079	0.816	0	1	0
											0.437	0.188	0.375	0	0	1	0	1	0
											0.062	0.124	0.814	0	0	1	0	1	0
											1	0	0	0.209	0.374	0.417	0	1	0
											0	1	0	0.174	0.435	0.391	0	1	0
											0	0.9	0.1	0	0	1	0.379	0.437	0.184
											1	0	0	0	0.429	0.571	0	0	1
											1	0	0	0.058	0	0.942	0	1	0
											0.333	0.25	0.417	0	1	0	0	1	0
											0.085	0.745	0.17	0	0	1	0.152	0.364	0.485
											0.035	0.215	0.75	1	0	0	0	0	1
											1	0	0	0	1	0	0	0.619	0.381
											0.581	0.209	0.209	0	0	1	0	1	0
											0	0.03	0.97	0.56	0.12	0.32	0	1	0
											0	1	0	0.536	0.464	0	0	0	1
											0	1	0	0	0	1	0.696	0.217	0.087
											1	0	0	0.286	0.357	0.357	1	0	0
											0	1	0	0	1	0	1	0	0
											0.04	0.424	0.536	0.15	0.25	0.6	0	0.078	0.922
											0	1	0				1	0	0
											1	0	0	0.055	0.058	0.887	0.72	0.28	0
											0	1	0	0	1	0	0	1	0
											1	0	0	0.241	0.759	0	0.069	0	0.931
											0.096	0.309	0.596	0.471	0.529	0	0	1	0
											0	0.359	0.641	0	1	0	1	0	0
											0	1	0	1	0	0	0	1	0
											0	1	0	0	1	0	0	1	0
											0	1	0	0	0.349	0.651	0	0	1
											0.105	0.029	0.866	0	1	0	0.197	0.167	0.636
											1	0	0	0.18	0	0.82	1	0	0
											1	0	0	0	1	0	0	1	0
											0.786	0.214	0	0	0.688	0.312	0	1	0
											0	1	0	0.923	0	0.077	0.571	0.429	0
											0	1	0	0	1	0	1	0	0
											0	1	0	0	1	0	0.667	0.333	0
											0	1	0	0.148	0	0.852	0.875	0.125	0
											0	1	0	0.259	0.519	0.222	0.4	0	0.6
											1	0	0	0	0	1	1	0	0
											0.465	0.535	0	0	0	1	0	0	1
											0	1	0	0.143	0.214	0.643	0	1	0
											1	0	0	0.095	0.172	0.734	1	0	0
											0	0.295	0.705	0	0	1	0	1	0
											1	0	0	0.611	0	0.389	0	1	0
											1	0	0	0.8	0	0.2	0.125	0	0.875
											0.222	0.378	0.4	1	0	0	1	0	0
											0.058	0.141	0.801	1	0	0	1	0	0
											0	1	0	0	1	0	1	0	0
											0	1	0	0	0	1	1	0	0
											0.491	0.4	0.109	0.083	0.278	0.639	1	0	0
											1	0	0	0.269	0	0.731	1	0	0
											0	1	0	0.133	0	0.867	0	1	0
											0	1	0	1	0	0	0	0.2	0.8
											0.433	0.1	0.467	0.245	0	0.755	1	0	0
											1	0	0	1	0	0	0	0.353	0.647
											1	0	0	0	0	1	0	1	0
											0	1	0	0.556	0.259	0.185	1	0	0
											0.545	0.455	0	0	1	0	0	1	0
											0.333	0.286	0.381	0	1	0	0	1	0
											0	1	0	0	0.611	0.389	0	1	0
											0.121	0.165	0.714	0	0	1	0	1	0
											1	0	0	1	0	0	0	1	0
											0.706	0.118	0.176	1	0	0	1	0	0
											0.052	0.026	0.922	0.347	0.093	0.56	0	1	0
											0.207	0.057	0.736	0	1	0	0	0	1
											0	0.824	0.176	0	1	0	0	0	1
											0	1	0	0	1	0	1	0	0
											0.048	0.214	0.738	1	0	0	1	0	0
											0.209	0.198	0.593	0	0.467	0.533	0.065	0	0.935
											0.338	0.308	0.354	0	0.333	0.667	0.176	0	0.824
											0	1	0	0	0.867	0.133	0	0	1
											0	0.556	0.444	0	1	0	0.714	0	0.286
											1	0	0	0.359	0.154	0.487	0	0	1
											0	1	0	0	1	0	1	0	0
											0	1	0	0.143	0.393	0.464	0	0.128	0.872
											0.221	0.142	0.637	0	0	1	0.149	0	0.851
											0.25	0.187	0.562	0	0	1	0	0	1
											0.152	0.065	0.783	0	0	1	0	0	1
											0	0	1	0	0.208	0.792	0	0.258	0.742
											0	1	0	1	0	0	1	0	0
											0	1	0	0.284	0	0.716	0	1	0
											0	0	1	0	0	1	1	0	0
											0	0.304	0.696	0.171	0.427	0.402	0	1	0
											0.186	0.167	0.647	0.182	0	0.818	1	0	0
											0	1	0	0.222	0	0.778	0	1	0
											0	1	0	0	0	1	0	1	0
											0	1	0	0.067	0.133	0.8	0	0.273	0.727
											0.571	0.429	0	0.4	0.067	0.533	0.2	0.333	0.467
											0	0.923	0.077	0.353	0.294	0.353	0	1	0
											0.194	0.194	0.613	0	1	0	0	1	0
											0	1	0	0.217	0.217	0.565	0	1	0
											0	1	0	0	1	0	0	0	1
											0	1	0	0.378	0.108	0.514	0.375	0	0.625
											1	0	0	0	0	1	0.182	0	0.818
											0.079	0	0.921	0	0	1	1	0	0
											0	0	1	0	0	1	0	0	1
											1	0	0	0.526	0.474	0	0	0	1
											0	0	1	0	1	0	0.183	0.038	0.779
											0.333	0.667	0	0	1	0	1	0	0
											0	1	0	0	0	1	0.333	0.564	0.103
											0	1	0				0.2	0.8	0
											0	1	0	0.292	0.112	0.597	0	1	0
											1	0	0	0.588	0.325	0.088	0	1	0
											0	0.227	0.773	0.254	0.61	0.136	0	0	1
											0	1	0	0.527	0.473	0	1	0	0
											0	1	0	0.667	0.333	0	1	0	0
											1	0	0	1	0	0
											0	1	0	0.185	0.27	0.545	0.042	0.11	0.848
											0.385	0	0.615	0.258	0.596	0.146	0.417	0.417	0.167
											0	0.049	0.951	0	1	0	0	0.923	0.077
											0	1	0	0.438	0.562	0	0	1	0
											0	1	0	0.132	0.359	0.509	0.735	0.265	0
											1	0	0	0.645	0.355	0	1	0	0
											0	1	0	0	1	0	1	0	0
											1	0	0	0.477	0.028	0.495	0.241	0.196	0.562
											0	0	1	0	0	1	0	1	0
											0	0.145	0.855	0.043	0	0.957	0	0	1
											0	1	0				0.2	0.545	0.255
											0	0	1				0.286	0.714	0
											0	0	1				0.179	0.572	0.249
											0.533	0	0.467				0	0.258	0.742
											0.75	0.25	0				0.091	0.208	0.701
											0	0	1				0.173	0.673	0.154
											0	1	0				1	0	0
											0	1	0				0.934	0	0.066
											0.203	0	0.797				0.829	0	0.171
											0.357	0.643	0				0.77	0.23	0
																	0.17	0.241	0.588
											0.16	0.773	0.067				0.067	0.509	0.424
											0.201	0.046	0.753				0.077	0.164	0.758
											0.906	0	0.094				0	0.684	0.316
											0	1	0				0.505	0.16	0.335
											0.121	0.293	0.586				0.086	0	0.914
											0.033	0	0.967				0	0.163	0.837
											0	1	0				0	1	0
											1	0	0				0.143	0.857	0
											0	1	0				0	0	1
											0	1	0				0.048	0	0.952
											0	1	0				0	0	1
											0.389	0.238	0.373				0	1	0
											0.218	0.202	0.58				0.15	0	0.85
											0	1	0				1	0	0
											0	1	0				0.286	0.714	0
											1	0	0				0.737	0.263	0
											0	1	0				0	0.156	0.844
											0.676	0.135	0.189				0.143	0.071	0.786
											0.11	0.143	0.747				1	0	0
											0	0	1				0	0.094	0.906
											0.25	0.4	0.35				0	0	1
											0.032	0.349	0.619				0	0	1
											0.145	0.319	0.536				0.368	0.632	0
											0.141	0.244	0.615				0	0	1
											0.925	0	0.075				1	0	0
											0.244	0.088	0.668				0.104	0	0.896
											0.105	0.034	0.861				0.153	0	0.847
											0	0	1				0	0.154	0.846
											1	0	0				0	1	0
											0.279	0.721	0				0.311	0.267	0.422
											0	1	0				0.214	0.786	0
											0	0	1
											0	0	1				0	0.464	0.536
											1	0	0				0.44	0.56	0
											0.514	0	0.486				0.111	0.59	0.299
											0.125	0.25	0.625				0	1	0
											0	1	0				1	0	0
											0.283	0	0.717				0	1	0
											0.234	0	0.766				1	0	0
											1	0	0				0.244	0.106	0.65
											0.586	0.414	0				1	0	0
											0.262	0.738	0				0.056	0.1	0.844
											0.433	0.5	0.067				0.526	0.474	0
											0	1	0				1	0	0
											1	0	0				0	0.178	0.822
											1	0	0				1	0	0
											1	0	0				0.118	0	0.882
											1	0	0				0	1	0
											0	1	0				0	1	0
											0	1	0				0	1	0
											0.198	0.055	0.747				0.05	0.189	0.761
											0	0	1				0.25	0	0.75
																	0.087	0.174	0.739
											0	1	0				1	0	0
											0	0.958	0.042				0.187	0.813	0
											0.435	0.497	0.068				0.114	0.886	0
											0.021	0.081	0.898				0	0.98	0.02
											0.084	0.763	0.153				0.404	0.553	0.043
											1	0	0				0	0.951	0.049
											0	0.969	0.031				0	1	0
											0	1	0				0.015	0.378	0.606
											0.333	0.366	0.301				0	1	0
											0	0.813	0.188				0	0.676	0.324
											0	0.871	0.129				0	1	0
											0.189	0.025	0.787				0	1	0
											0.05	0.024	0.926				0	0.5	0.5
											0.016	0.348	0.636				0	1	0
											0	0.147	0.853				0	1	0
											0.016	0.422	0.562				0.733	0.156	0.111
											0	1	0				0	0	1
											0.157	0.231	0.612				0	0	1
											0.068	0.932	0				0.529	0.471	0
											0	0.187	0.813				0.296	0	0.704
											0.146	0.415	0.439				0	0.625	0.375
											0.574	0.426	0				1	0	0
											0	1	0				0.495	0.455	0.05
											0.559	0.176	0.265				1	0	0
											0	1	0				0	0.692	0.308
											0	0.455	0.545				0.078	0.135	0.787
											0.037	0.047	0.916				1	0	0
											0	1	0				0	0.945	0.055
											1	0	0				0	1	0
											0.406	0.094	0.5				0.513	0.126	0.361
											0.767	0.1	0.133				0.971	0	0.029
											0	0.171	0.829				0.479	0.521	0
											0.571	0.238	0.19				0.4	0.558	0.042
											0.068	0.322	0.61				0.365	0.46	0.175
											0	0	1				0	1	0
											0.077	0.134	0.789				0.571	0.429	0
											0	1	0				0.183	0.817	0
											0	1	0				0	1	0
											0.333	0	0.667				0	0.889	0.111
											0	0	1				0.907	0	0.093
											0	0	1				0.305	0.042	0.653
											0	0	1				0	0.957	0.043
																	0.175	0.825	0
											0.258	0.677	0.065				0.242	0.758	0
											1	0	0				0.793	0	0.207
											0	1	0				0	1	0
											1	0	0				0.302	0.698	0
											0	0.932	0.068				0.331	0.024	0.645
											0	1	0				0.524	0.333	0.143
											0	1	0				0.633	0.167	0.2
											1	0	0				0	0.282	0.718
											1	0	0				0.057	0	0.943
											0	1	0				0	0	1
											0.295	0.474	0.231				0.371	0.2	0.429
											0	1	0				0.318	0.187	0.495
											0.576	0.424	0				1	0	0
											0	1	0				1	0	0
											0	1	0				0	1	0
											0.188	0.565	0.246				0	1	0
											1	0	0				0.828	0	0.172
											0	0.274	0.726				1	0	0
											0	0.941	0.059				1	0	0
											0	1	0				1	0	0
											0	1	0				0	1	0
											0.364	0.273	0.364				1	0	0
											0.684	0	0.316				0	1	0
											0.268	0	0.732				0.871	0	0.129
											0.36	0	0.64				0	1	0
											1	0	0				0.353	0.059	0.588
											0.168	0.153	0.678				0.444	0.556	0
											0.106	0.169	0.725				0	0.966	0.034
											0	1	0				1	0	0
											0	1	0				0	1	0
											0	1	0				0	1	0
											0	0.944	0.056				1	0	0
											0.588	0.188	0.224				0	1	0
											1	0	0				0.319	0.083	0.597
											0	1	0				1	0	0
											0	1	0				0	1	0
											0.462	0.538	0				0.267	0.733	0
											0.301	0.171	0.528				0.154	0.335	0.511
											0	1	0				0.297	0.432	0.27
											1	0	0				1	0	0
											0	1	0				0.388	0.579	0.033
											0.462	0.385	0.154				0.533	0.467	0
											0.029	0.018	0.953				1	0	0
											0	0.808	0.192				0.891	0	0.109
											0	1	0				0.455	0.545	0
											0	1	0				0	1	0
											1	0	0				0.315	0.142	0.543
											0.919	0.081	0				0	0	1
											1	0	0				0	0	1
											1	0	0				0	1	0
											0	0.615	0.385				0.306	0.653	0.041
											0.625	0.375	0				0	0.063	0.937
											0	1	0				0	1	0
											0.462	0.308	0.231				0	0.363	0.637
											0.375	0.375	0.25				0	0.579	0.421
											0.057	0.714	0.229				1	0	0
											0	1	0				0.111	0.889	0
											0	1	0				0.409	0.273	0.318
											0	0	1				0.317	0.396	0.288
											0	1	0				0	1	0
											1	0	0				1	0	0
											0	1	0				0	1	0
											0	1	0				0.286	0	0.714
											0.5	0.5	0				0	0.3	0.7
											0.043	0.404	0.553				0	0.52	0.48
											1	0	0				0	1	0
											0.906	0.094	0				0	1	0
											1	0	0				0.475	0	0.525
											1	0	0				0	0.688	0.312
											0	1	0				0	1	0
											0.704	0	0.296				0	1	0
											0.182	0.455	0.364				0	1	0
											0.667	0.333	0				0	1	0
											1	0	0				1	0	0
											1	0	0				1	0	0
											0	0.667	0.333				0	1	0
											0.074	0.63	0.296				0	1	0
											0	0	1				0	1	0
											1	0	0				0.623	0.333	0.043
											0.667	0	0.333				0.719	0	0.281
											0.467	0.133	0.4				1	0	0
											1	0	0				1	0	0
											1	0	0				0	1	0
											0.556	0.444	0				0.277	0.149	0.574
											0	1	0				0	0.195	0.805
											0	0	1				0	0	1
											1	0	0				0	1	0
											0	0.016	0.984				1	0	0
											0.074	0.059	0.868				0.759	0	0.241
											1	0	0				0.706	0	0.294
											1	0	0				0.417	0	0.583
											0	1	0				0	1	0
											0	1	0				1	0	0
											0	0.286	0.714				0.493	0.07	0.437
											0.37	0.111	0.519				0	1	0
											0	0	1				0	1	0
											0.5	0	0.5				1	0	0
											0	1	0				0	0	1
											1	0	0				0	1	0
											1	0	0				0	1	0
											1	0	0				1	0	0
											0	1	0				0	1	0
											0	0	1				1	0	0
											0.205	0	0.795				0	0	1
											0.5	0.5	0				0	1	0
											0.455	0.545	0				0.5	0.5	0
											0.615	0.385	0				0	0.094	0.906
											0	1	0				1	0	0
											0	0.885	0.115				0	0.455	0.545
											0.4	0	0.6				0.118	0.395	0.487
											1	0	0				1	0	0
											1	0	0				0	1	0
											0.137	0.843	0.02				0	0.177	0.823
											0	0.5	0.5				0.104	0.179	0.716
											0	0.545	0.455				0	1	0
											0.182	0.818	0				1	0	0
											0	1	0				0.75	0	0.25
											0.308	0.692	0				0	1	0
											0.375	0	0.625				0	0	1
											0.333	0.667	0	0.318	0.314	0.368	1	0	0
											1	0	0	0.075	0	0.925	0	0.217	0.783
											0	1	0	1	0	0	1	0	0
											0	0.872	0.128	1	0	0	1	0	0
											0	0	1	0.458	0.019	0.523	0.375	0.625	0
											0.5	0.5	0	0	0	1	0	0	1
											1	0	0	0	0	1	0	1	0
											0.143	0.086	0.771	0	0	1	0.095	0.619	0.286
											0.778	0.222	0	0	0	1	0	1	0
														0.491	0.168	0.341	0	1	0
														0	1	0	0.867	0.133	0
																	1	0	0
														0	0.741	0.259	1	0	0
											0.089	0.167	0.744				0.121	0.697	0.182
											0.261	0.106	0.634	0.03	0.507	0.463	0	0.2	0.8
											0	0	1	0.15	0.735	0.115	0.074	0.611	0.315
											0	0.784	0.216	1	0	0	1	0	0
											0	0	1	0	0	1	0.241	0.483	0.276
											0	0	1	0	0	1	0	0	1
											0.271	0.729	0	1	0	0	0.368	0.632	0
											0.315	0	0.685	0	1	0	0	1	0
														0	0	1	0	1	0
											0	1	0	0.8	0.2	0	0	1	0
											1	0	0	0	0	1	0	0	1
											0.206	0.593	0.202	0	1	0	1	0	0
											0.169	0.112	0.719	0.208	0.264	0.528	0.357	0	0.643
											0	1	0	0.792	0.208	0	0	0	1
											0.289	0.129	0.582	0	0	1	1	0	0
											0	1	0	0	0.373	0.627	0.167	0	0.833
											0.155	0.279	0.566	0	1	0	0	0.6	0.4
											0	0.545	0.455				0.353	0.353	0.294
											0	1	0	0.564	0.436	0	0.583	0	0.417
											0	0	1	0.067	0.163	0.77	1	0	0
											0	0	1	0.31	0.283	0.407	0	0	1
											0	0	1	0	0	1	1	0	0
											0	1	0	0.35	0.5	0.15	0.556	0.444	0
											0	0.403	0.597	0.254	0.343	0.403	0	0.318	0.682
											0	0	1	0.25	0.292	0.458	0	1	0
											0	0	1	0	1	0	0	0	1
											0	0	1	0.951	0	0.049	0	1	0
											1	0	0	0.151	0.04	0.809	0	0	1
														0.295	0.092	0.612	1	0	0
											0.425	0.374	0.201	0.188	0.188	0.625
											0.142	0.858	0	0.398	0.051	0.551	0.034	0.926	0.04
											0.365	0.531	0.104	0.029	0.092	0.879	0.417	0.583	0
											0	1	0	0	0	1	0.671	0	0.329
											0.4	0.267	0.333	0	1	0	0.528	0	0.472
											0	0.9	0.1	0.61	0.049	0.341	0.962	0	0.038
											0	1	0	0.567	0.312	0.122	0	1	0
											0	1	0	0.088	0	0.912	1	0	0
											0.198	0.51	0.292	0.074	0.257	0.669	0.25	0.062	0.688
											0.6	0.163	0.238	1	0	0	0.085	0.407	0.508
											0.145	0.31	0.546	0	1	0	0	0.974	0.026
											0.386	0.614	0	1	0	0	0.09	0.34	0.57
											0.512	0.488	0	0	0	1	0	1	0
											0	1	0	0	1	0	1	0	0
											0.52	0.48	0	0	1	0	0	1	0
											0.706	0	0.294	0	1	0	0	1	0
											0.88	0.12	0				0.372	0.488	0.14
											1	0	0	1	0	0	0.158	0.634	0.208
											0	0	1	0	1	0	0.158	0.132	0.711
											0	0	1	0.193	0.24	0.566	1	0	0
											0.4	0	0.6	0	1	0	0.279	0	0.721
											0.314	0.09	0.596	1	0	0	0.433	0.3	0.267
											0	1	0	0.063	0.937	0	1	0	0
											0.241	0.135	0.625	0.473	0.236	0.291	0	1	0
											0	1	0	0	1	0	0.42	0	0.58
											0	0.915	0.085	1	0	0	0	1	0
											0	1	0	1	0	0	0.265	0	0.735
											0.376	0.248	0.376	0	1	0	0.4	0.6	0
											0.222	0.102	0.677	0	0	1	0	1	0
											0	1	0	0.153	0.233	0.614	1	0	0
											0.168	0	0.832	0.104	0.591	0.304	1	0	0
											0	0.753	0.247	0.173	0.264	0.563	0	1	0
											1	0	0	0.212	0.788	0	0	1	0
											0.593	0.08	0.327	0.259	0.741	0	1	0	0
											0	0	1	0	1	0	0.456	0.344	0.2
											1	0	0	0.491	0.509	0	0.283	0.063	0.654
											0.151	0.849	0	0.152	0.543	0.304	0.153	0.14	0.707
											1	0	0	1	0	0	1	0	0
											0.762	0.238	0	0	0	1	0.485	0.273	0.242
											1	0	0	0.131	0.869	0	0	0	1
											0	1	0	0.255	0.245	0.5	0.661	0.339	0
											0.418	0.392	0.19	0.074	0.926	0	0	1	0
											0.537	0.463	0	0	1	0	0.86	0	0.14
											0	0.772	0.228	0	1	0	1	0	0
											0	1	0	0.138	0.369	0.493	0	1	0
											0	1	0	1	0	0	0	1	0
											0.679	0	0.321	0.52	0.16	0.32	0.097	0	0.903
											0	0.166	0.834	1	0	0	0	0.907	0.093
											0.102	0	0.898	0	1	0	0.118	0	0.882
											1	0	0	1	0	0	0	0	1
											0	0	1	1	0	0	0	0	1
											0	0	1	0	0.391	0.609	0	1	0
											0.349	0.142	0.509	0.477	0	0.523	0	0.575	0.425
											0.472	0.528	0	0	1	0	0	1	0
											0	0	1	0	1	0	0.177	0.281	0.542
											0.295	0.477	0.227				0.059	0	0.941
											1	0	0	0	0.167	0.833	0	1	0
											0.529	0.471	0	0.487	0.513	0	0	1	0
											1	0	0	0.145	0.855	0	0	1	0
											0	1	0	0.227	0.562	0.211	1	0	0
											0	0	1	0.541	0.431	0.028	0.814	0.186	0
											1	0	0	0.19	0.81	0	0	1	0
											0	0	1	0.472	0.134	0.394	0	1	0
														0.234	0.505	0.261	0	0	1
											1	0	0	0	1	0	1	0	0
											0	1	0	0.068	0.932	0	0	1	0
											0.278	0.097	0.625	0.115	0.885	0	1	0	0
											1	0	0	0.25	0.577	0.173	1	0	0
											0.503	0.497	0	0.407	0.593	0	1	0	0
											0.313	0.085	0.603	0	0	1	1	0	0
											0.302	0.103	0.595	0	0	1	0	0.303	0.697
											0	1	0	0	0	1	1	0	0
											0.566	0.355	0.079	0	0	1	0	0.18	0.82
											0.08	0.179	0.741	0	0	1	0.629	0.157	0.214
											1	0	0				0	0	1
											1	0	0	0.433	0.567	0	0.818	0.182	0
											0	0	1	0	1	0	0	0	1
											1	0	0	0.891	0	0.109	0	0	1
											0.135	0.865	0	0	0.053	0.947	0	0.696	0.304
											0	0.075	0.925	0.667	0.333	0	0	0	1
											1	0	0	0	1	0	1	0	0
											0	1	0	0.139	0.093	0.768	0	1	0
											0	1	0	0.156	0.057	0.787	0	0	1
											0.789	0.211	0	0.73	0	0.27	0	0	1
											1	0	0	1	0	0	0	1	0
											0.721	0.279	0	0.82	0.18	0	0	0	1
											0	1	0	0	1	0	0	0.361	0.639
											0.207	0.5	0.293	0	1	0	1	0	0
											1	0	0	0.741	0	0.259	1	0	0
											0	1	0	0.618	0.382	0	0	0.305	0.695
											0.387	0.153	0.46	0	0	1	0	1	0
											0	0	1	0	1	0	1	0	0
											0	1	0	0.157	0.279	0.564	0.147	0	0.853
											0	0.039	0.961	0.127	0.06	0.813	0	0.106	0.894
											0.016	0	0.984	0.284	0.388	0.328	0	1	0
											0	0	1	0	0.574	0.426	1	0	0
											0	0	1	0	1	0	0.172	0.172	0.655
														0	1	0	0	0.579	0.421
											0	1	0	0	0	1	0.468	0	0.532
											0.083	0	0.917	1	0	0	1	0	0
											0	0	1	0	0	1	0	1	0
											0	0	1	0	0	1	0.607	0	0.393
											0	0.288	0.712	0	1	0	1	0	0
											0	0	1	0.792	0	0.208	1	0	0
											0	0	1	0	0	1	0	0	1
											0	0	1	0	0	1	0	0	1
											0	1	0	0	1	0	0.243	0.243	0.514
											0.179	0.418	0.403
											0.545	0	0.455	0	0	1	1	0	0
														0.295	0.114	0.591	1	0	0
											0	1	0	1	0	0	1	0	0
											0.572	0.353	0.074	0	0.528	0.472	1	0	0
											0.159	0.432	0.409	0.37	0.463	0.167	0.041	0.822	0.137
											0.151	0.373	0.476	0.065	0.661	0.274	0.068	0.466	0.466
											1	0	0	0.145	0.311	0.544	0.341	0.185	0.473
											0	1	0	0.199	0.337	0.464	0	1	0
											0.131	0	0.869	0.121	0.476	0.403	1	0	0
											0	0	1	0.236	0.703	0.061	1	0	0
											0.311	0.689	0	0	0.582	0.418	0	1	0
											0	0	1	0	1	0	0	1	0
											0	0	1	0.235	0.765	0	0	1	0
											1	0	0	0.141	0.293	0.565	1	0	0
											0	1	0	0.575	0	0.425	1	0	0
											0.592	0.408	0	0.096	0.63	0.274	1	0	0
											0	0	1	0.125	0	0.875	0.064	0.056	0.88
														0	0	1	0.493	0.384	0.123
											0.167	0.778	0.056	1	0	0	0.328	0.552	0.119
											1	0	0	1	0	0	0.938	0	0.062
											1	0	0	0.605	0.395	0	0.818	0.073	0.109
											0.298	0.702	0	0	0	1	0	0.925	0.075
											0.245	0.755	0	0.167	0	0.833	0	1	0
											0.309	0.299	0.392	0.109	0.014	0.877	0.625	0.375	0
											0.178	0.086	0.736	1	0	0	0.069	0.05	0.881
											0.154	0.212	0.635	1	0	0	0	1	0
											0	1	0	0	1	0	1	0	0
											0.287	0.631	0.082	0.319	0.681	0	0	1	0
											0.047	0.953	0	0.95	0	0.05	0.404	0	0.596
											0.815	0.185	0				0	1	0
											0.304	0	0.696	0	1	0	1	0	0
											0.59	0.41	0	0.562	0.438	0	0.231	0.337	0.432
											0	1	0	0.288	0.424	0.288	1	0	0
											0.076	0	0.924	0	0.9	0.1	0.083	0.917	0
											0.267	0.733	0	0.448	0.328	0.224	0	1	0
											0.074	0	0.926	0.318	0.682	0	0.176	0	0.824
											0.491	0.181	0.328	0.089	0.114	0.797	0.227	0.091	0.682
											0	1	0	0.372	0.104	0.523	1	0	0
											1	0	0	0.68	0.32	0	0	1	0
											0.217	0.708	0.075	1	0	0	1	0	0
											0	0	1	0	1	0	0.035	0.188	0.776
											0	1	0	0.667	0.176	0.157	1	0	0
											0.118	0.882	0	0	1	0	0	0.136	0.864
											0	1	0	0.414	0.465	0.121	0	1	0
											1	0	0	0.127	0.873	0	1	0	0
											1	0	0	0	1	0	0.4	0.6	0
											0	1	0	0	1	0	0.353	0.647	0
											0	0.831	0.169	0.041	0	0.959	0	0.857	0.143
											1	0	0	0.444	0.556	0	0	1	0
											1	0	0	0	1	0	1	0	0
											0	0	1	1	0	0	0	0.5	0.5
											0.235	0.765	0	0	0.17	0.83	1	0	0
											0	0.787	0.213	0.268	0.244	0.488	0.16	0	0.84
											0	0.293	0.707	0.366	0.06	0.574	0.066	0.079	0.855
											0.172	0.138	0.69	0.311	0.178	0.511	0	1	0
											0	1	0	0.643	0.357	0	0	1	0
											1	0	0	0	0	1	1	0	0
											0	0	1	0.153	0.624	0.224	0.429	0.571	0
														0	0	1	0	0	1
											0.141	0.117	0.743	0.081	0.423	0.495	0	1	0
											0.625	0.375	0	0	0.144	0.856	0	1	0
											0.305	0.333	0.362	0	0	1	0	1	0
											0	1	0	1	0	0	0	0	1
											0	1	0	0	1	0	0.102	0.051	0.847
											0.582	0.418	0	0	1	0	1	0	0
											1	0	0	0.5	0.5	0	0	1	0
											0	1	0	0	1	0	0	1	0
											0	1	0	0	0	1	0	0.26	0.74
											0	0.063	0.937	0	0	1	0	1	0
											0	1	0	0	0.364	0.636	0	0.202	0.798
											0	1	0	0	0	1	0.281	0.052	0.667
											0.241	0.759	0				0	1	0
											0.195	0.503	0.302	0	1	0	0	1	0
											0	0.065	0.935	0.722	0	0.278	1	0	0
											0	0	1	0.288	0.407	0.305	1	0	0
											0.644	0.356	0	1	0	0	0	1	0
											0.056	0.806	0.137	0	1	0	0	1	0
											0.11	0.85	0.04	0	0.367	0.633	1	0	0
											0.046	0	0.954	0	0.806	0.194	1	0	0
											0	1	0	0.432	0.341	0.227	0	1	0
											0.603	0.397	0	0	0	1	1	0	0
											0	0	1	0.203	0.286	0.511	1	0	0
											0	1	0	0	0	1	0	1	0
											0	1	0	0	0.244	0.756	0	0.471	0.529
											0.281	0.209	0.511	0	1	0	0	0.719	0.281
											0.236	0.764	0	0	1	0	0	0.415	0.585
											0.239	0.761	0	1	0	0	0	1	0
											0.182	0.818	0	0	0	1	0	1	0
											0.096	0.904	0	0	0	1	0	1	0
											0.172	0.828	0	0	0	1	0.742	0.258	0
											1	0	0	0	1	0	1	0	0
											0	1	0	0	1	0	0.395	0.182	0.423
											0	0	1	0	1	0	0	0.244	0.756
											0	0	1	0	0	1	0	1	0
											0.612	0	0.388	0	0	1	0	1	0
											0	0.184	0.816	0	0	1	0.278	0.444	0.278
											0	1	0				0	0	1
											0	0	1				1	0	0
											0.073	0	0.927				0	1	0
											0.494	0.506	0				0.522	0.478	0
											0.315	0.685	0				0	1	0
											0	1	0				1	0	0
											1	0	0				0	1	0
											0.871	0	0.129				1	0	0
											0.102	0.159	0.739				1	0	0
											0	0	1				0	1	0
											0.108	0	0.892				1	0	0
											0.242	0.758	0				0.241	0.759	0
											0	1	0				1	0	0
											0	1	0				0	1	0
											0	0	1				0	1	0
											0	0	1				0	1	0
											0.536	0.464	0				0	0.169	0.831
											0	0	1				0	0	1
											1	0	0				0	0.039	0.961
											0.264	0.327	0.409				0.133	0.147	0.72
											0.288	0.379	0.333				0	0	1
											0	1	0				0	1	0
											1	0	0				0.452	0.214	0.333
																	0	0	1
											0	1	0				1	0	0
											0.478	0.336	0.186				1	0	0
											1	0	0				0.4	0.4	0.2
											0.136	0.354	0.51				0	0.75	0.25
											0.076	0.44	0.484				1	0	0
											0	0.531	0.469				1	0	0
											0.449	0.551	0				0	1	0
											1	0	0				0	0	1
											1	0	0				0	1	0
											0.397	0.603	0				1	0	0
											0	0.579	0.421				0	1	0
											0.554	0.446	0				0	1	0
											0	0.107	0.893				0	1	0
											0.867	0.133	0				0.75	0.083	0.167
											0	0	1				1	0	0
											0.067	0.075	0.858				1	0	0
											0.028	0.225	0.747				0.783	0.217	0
											0	0	1				0.333	0.667	0
											0	0	1				0	0.233	0.767
											0.029	0.392	0.579				0.4	0	0.6
											0	0.651	0.349				0	1	0
											1	0	0				1	0	0
											0.16	0.057	0.783				0.781	0.219	0
											0.219	0.247	0.534				1	0	0
											0.267	0.163	0.57				0	0.256	0.744
											0	1	0				1	0	0
											0	0	1				0	0	1
											0	0	1				0	1	0
											1	0	0				0	1	0
											0	1	0				0	1	0
											0	1	0				0	0	1
											0.127	0.349	0.524				0	0.158	0.842
											0.338	0	0.662				0	1	0
											1	0	0
											0	1	0				0	0.879	0.121
											1	0	0				1	0	0
											0	0	1				1	0	0
											0.308	0.154	0.538				0.688	0.022	0.29
											0.154	0.691	0.154				1	0	0
											0	0.481	0.519				0	1	0
											0	0	1				0	1	0
											0	0	1				0.278	0.722	0
											0	0	1				0.5	0.5	0
											0	0	1				0.532	0	0.468
											0.643	0.357	0				1	0	0
																	0	0.868	0.132
											0	0.19	0.81				0	1	0
											0	0.147	0.853				0.583	0.298	0.119
											0.411	0.355	0.234				0.211	0.333	0.456
											1	0	0				1	0	0
											0.497	0.299	0.204				0.214	0	0.786
											0.483	0.517	0				0	0	1
											0.367	0	0.633				0.733	0.267	0
											0.495	0.33	0.174				0.356	0	0.644
											0	0.961	0.039				1	0	0
											0.311	0.689	0				0.301	0.088	0.611
											1	0	0				0.098	0.804	0.098
											0	0.078	0.922				0.953	0.047	0
											0	0.327	0.673				0.212	0.557	0.231
											0	1	0				0.806	0.194	0
											0	0.799	0.201				0	0.889	0.111
											0	0.062	0.938				0.081	0.398	0.521
											0	0.741	0.259				0	1	0
											0	1	0				0.057	0.539	0.404
											1	0	0				0.153	0.685	0.161
											0.147	0	0.853				0.963	0	0.037
											0.272	0.526	0.202				0.373	0.291	0.336
											0.868	0	0.132				0.346	0.654	0
											1	0	0				0.269	0.269	0.462
											0.513	0.393	0.094				0.333	0.579	0.088
											1	0	0				0	1	0
											0	0.429	0.571				0.134	0.241	0.625
											0	1	0				0	1	0
											0.257	0.743	0				0.569	0.228	0.203
											1	0	0				0	1	0
											0	0	1				0.495	0	0.505
											0	0	1				0.291	0.027	0.682
											0	0	1				0.771	0	0.229
											0	0	1				1	0	0
											0	0	1				0	0.5	0.5
											0	0	1				0	1	0
											0	0.5	0.5				0.315	0.345	0.339
											0	1	0				0	1	0
											0.147	0	0.853				0	1	0
											0	1	0				0	1	0
											0	1	0				0	1	0
																	0.152	0.848	0
											0.062	0.828	0.109				0	0.9	0.1
											1	0	0				0	1	0
											0.733	0.267	0				0	1	0
											1	0	0				0.135	0.532	0.333
											0.33	0.29	0.381				0.366	0.195	0.439
											0.196	0.079	0.725				0	0	1
											0.114	0.222	0.665				0.333	0	0.667
											0.016	0.178	0.806				1	0	0
											0.435	0.531	0.034				0.15	0.85	0
											0	1	0				0	0	1
											0	1	0				0.324	0.676	0
											0.08	0.4	0.52				0.389	0.053	0.558
											0.087	0.913	0				0	0.111	0.889
											0.795	0	0.205				0	1	0
											0.23	0	0.77				0	0	1
											0	1	0				0.239	0.141	0.62
											0	1	0				0	0	1
											1	0	0				0	1	0
											0.897	0	0.103				0	0.886	0.114
											1	0	0				0	1	0
											0	1	0				0	0.788	0.212
											0.411	0	0.589				0	1	0
											1	0	0				1	0	0
											0.229	0.371	0.4				0.404	0	0.596
											0.11	0.89	0				0	1	0
											0	1	0				0	0	1
											1	0	0				0	0	1
											0.24	0.76	0				0.065	0.442	0.494
											0	0.72	0.28				0	1	0
											0	1	0				0.762	0.238	0
											0	0.261	0.739				0.212	0.788	0
											0	1	0				0.25	0.071	0.679
											0.141	0.529	0.329				0.095	0.286	0.619
											0	1	0				0.321	0.25	0.429
											0.364	0.636	0				0.472	0.528	0
											0	1	0				0.057	0.106	0.837
											0	0	1				0.031	0.058	0.911
											1	0	0				0.104	0.443	0.453
											1	0	0				0	0	1
											0	1	0				0	1	0
											0	0	1				0.167	0	0.833
											0.131	0.869	0				0	1	0
											0.419	0.581	0				0	1	0
											0	1	0				1	0	0
											0	1	0				1	0	0
											0	0	1				0	1	0
											1	0	0				0	1	0
											0.46	0	0.54				0.424	0.485	0.091
											0	1	0				0	0.961	0.039
											0.784	0.216	0				0	1	0
											0	0	1				0.55	0.225	0.225
											0	1	0				0	1	0
											1	0	0				0	1	0
											0	1	0				0	0	1
											0	1	0				0.147	0.074	0.779
											0	1	0				0	0.055	0.945
											1	0	0				0	1	0
											1	0	0				0.75	0.25	0
											0	1	0				0.052	0.325	0.623
											0.69	0	0.31				0.156	0	0.844
											0	1	0				0.257	0.486	0.257
											0	1	0				0	1	0
											0	1	0				1	0	0
											0	1	0				1	0	0
											0	1	0				0	1	0
											0	0.176	0.824				0.039	0.098	0.863
											0.333	0.667	0				0	0.882	0.118
											1	0	0				0	1	0
											0	1	0
											0.333	0.667	0				0.139	0.147	0.714
											0.333	0.667	0				0	1	0
											0	0	1				0	1	0
											1	0	0				0.95	0	0.05
											0	1	0				0.909	0	0.091
											0	1	0				0.278	0.387	0.334
											0	1	0				0	1	0
											1	0	0				0	1	0
											0	1	0				0	1	0
											0.388	0.613	0				0.5	0.5	0
											0	0	1				0.385	0.615	0
											0	1	0				1	0	0
											1	0	0				1	0	0
											0.878	0.061	0.061				0.587	0.107	0.306
											0.532	0.113	0.355				0	1	0
											0	0	1				0	1	0
											0	1	0				0	1	0
											0.195	0.805	0				1	0	0
											0	0	1				0	1	0
											0.647	0.353	0				0.926	0	0.074
											0	0.356	0.644				0.116	0.5	0.384
											0	1	0				0.248	0.323	0.429
											0.655	0.345	0				0.058	0	0.942
											0	1	0				0	1	0
											0.301	0.699	0				0.211	0.199	0.59
											0	0	1				0	1	0
											0	0	1				0	1	0
											1	0	0				0	0	1
											0	1	0				0	0.108	0.892
											0.467	0.147	0.387				0	0.923	0.077
											0.159	0.304	0.536				0	1	0
											0	0	1				1	0	0
											1	0	0				0	0.065	0.935
											0	1	0				0	1	0
											0	0	1				0.13	0.08	0.791
											0	0	1				0.313	0.04	0.646
											1	0	0				0.429	0.571	0
											0	1	0				1	0	0
											0.393	0.607	0				1	0	0
											1	0	0				0.627	0.337	0.036
											0	1	0				0.402	0	0.598
											0	1	0				0	0.432	0.568
											1	0	0				0	0.441	0.559
											0	0	1				0	0.442	0.558
											0	0	1				0.531	0.469	0
											0	1	0				0	0	1
											0	0	1				0.514	0.486	0
											0.625	0	0.375				1	0	0
											0	1	0				1	0	0
											0	1	0				0	1	0
											1	0	0				0	0.302	0.698
											0	0	1				0.758	0	0.242
											1	0	0				0	0.536	0.464
											0	1	0				0.376	0.359	0.265
											0	1	0				0	0	1
											0	0	1				0.529	0.368	0.103
											0	0.214	0.786				0.172	0.828	0
											0.867	0.133	0				0	0	1
											0.688	0.312	0				0	1	0
											0.514	0.486	0				1	0	0
											0	1	0				0	0	1
											0	1	0				0	0	1
											1	0	0				0	0	1
											0	1	0				0	1	0
											0.438	0.497	0.066				0.133	0.571	0.295
											0	1	0				0.574	0.426	0
											0.338	0.031	0.631				0.244	0.707	0.049
											0	0.79	0.21				0	1	0
											0.22	0.196	0.584				1	0	0
											0	1	0				0	1	0
											0	0.744	0.256				0	1	0
											1	0	0				1	0	0
											1	0	0				0	0.676	0.324
											0	1	0				0	0.187	0.813
											0	0.449	0.551				0	1	0
											0	1	0				0.4	0.28	0.32
											0	0	1				0.286	0.444	0.27
											0	0.017	0.983				0.315	0.502	0.183
											0	0	1				0.451	0.465	0.085
											0	0.634	0.366				0.036	0.964	0
											1	0	0				0.024	0.11	0.865
											0	0.478	0.522				0	1	0
											0	0	1				0.101	0.519	0.38
											0	0	1				0	1	0
											1	0	0				0.516	0.484	0
											0	0.36	0.64				0.412	0.588	0
											0	0	1				0	1	0
											0.076	0	0.924				0.085	0.487	0.427
											1	0	0				0.187	0.049	0.763
											0	0.376	0.624				0.394	0.606	0
											0	1	0				0	1	0
											0.967	0.033	0				0.162	0.471	0.368
											0.967	0.033	0				0	1	0
											1	0	0				0.452	0.29	0.258
											0	1	0				0	1	0
											0	1	0				0	1	0
											0	0	1				0	1	0
											0	0	1				0	1	0
											0	0	1				0	1	0
											0	0	1				1	0	0
											0.623	0.116	0.261				1	0	0
											0.171	0.829	0				0.893	0	0.107
											0	0	1				0.917	0.041	0.041
											0	0.136	0.864				0	1	0
											0.359	0.641	0				0.109	0.873	0.018
											0.756	0.244	0				0	0.942	0.058
											1	0	0				0	1	0
											0	0	1				0	1	0
											0.101	0.416	0.483				0	1	0
											0	0	1				1	0	0
											0	1	0				0	1	0
											0	0.828	0.172				0	1	0
											0	0	1				0	1	0
											0	1	0				1	0	0
											1	0	0				0.915	0	0.085
											0	1	0				1	0	0
											1	0	0				0.895	0	0.105
											0	0	1				1	0	0
											0	0	1				1	0	0
											0	0	1				0.898	0.074	0.028
											0.723	0.106	0.17				1	0	0
											1	0	0				0	1	0
											1	0	0				1	0	0
											0	1	0				0.077	0.552	0.371
											0	0	1				0.442	0.488	0.07
											0	0	1				0.2	0.667	0.133
											0	1	0				0.474	0	0.526
											0	1	0				0.52	0.48	0
											0	1	0				0.206	0.676	0.118
											0	0	1				0	0.735	0.265
											0	0	1				0	1	0
											1	0	0				0	1	0
											0.663	0.337	0				0	1	0
											0	0.486	0.514				0.571	0	0.429
											0	0	1				1	0	0
											0.609	0	0.391				1	0	0
											0	1	0				1	0	0
											0	0.36	0.64				0.389	0.611	0
											0	1	0				0	0.898	0.102
											0	0.605	0.395				0.227	0.545	0.227
											1	0	0				0	1	0
											0	0.325	0.675				0.333	0.667	0
											0	0	1				0	0.867	0.133
											0	0	1				0	1	0
											0	0	1				0	1	0
											0	1	0				0	0.812	0.188
											0.441	0.559	0				0	1	0
											0.531	0.469	0				0	1	0
											0.621	0.379	0				0.475	0.525	0
											0	1	0				0.276	0.517	0.207
																	0	0	1
											0.078	0.922	0				0.544	0.088	0.368
											0.221	0.118	0.661				1	0	0
											0.195	0.417	0.388				1	0	0
											0	0.835	0.165				0.172	0	0.828
											0	0.692	0.308				0	1	0
											0	0	1				0	1	0
											0.369	0.251	0.379				0.273	0.727	0
											0.95	0	0.05				0	1	0
											0.103	0.052	0.845				1	0	0
											0.172	0.314	0.515				0	1	0
											0	0	1				0	1	0
											0	0	1				0	1	0
											1	0	0				0.13	0.87	0
											0	0	1				0.144	0.856	0
											0	1	0				1	0	0
											0	0.661	0.339				1	0	0
											0	0	1				0.881	0	0.119
											0	0	1				0.025	0	0.975
											0	0	1				0.174	0.754	0.072
											0	0	1				0.477	0.385	0.138
											0	0	1	1	0	0	0.377	0.623	0
											0.219	0.363	0.419	0.071	0.929	0	0.794	0.118	0.088
											0.228	0.277	0.495	0.189	0.351	0.459	0	0.117	0.883
											0	0	1	0.333	0.667	0	0	1	0
											0	1	0	0	1	0	0.056	0.944	0
											0	0	1	0	0.259	0.741	0.438	0.537	0.025
											0	0	1	0	1	0	0	1	0
[truncated: 1,748 more rows]
