# Supplementary material for: Regulation of different phases of AMPA receptor intracellular transport by 4.1N and SAP97
Source: eLife journal article supplement (doi:10.7554/elife.85609), 2023-04-06
Supplement: fig2-data1 [file Figure 2.xlsx]

## Sheet: Immuno
Fig 2D	WT	30	8.19127	0.102019	3.54533	14.223	17.0162	12.0896	19.172	2.94811	3.53342	8.48318	10.2138	5.45464	10.7298				42.2632	30.4834	33.3787	45.6127	49.2124	36.058	24.5224	54.1607	40.7553	57.6442				24.8963	16.5434	19.4327	12.1827	23.0793	35.0765	9.50783	22.8239	27.9159	15.4837					9.0238	15.0563	14.4442	25.8971
		60		59.1142	33.6698	44.6871	20.3144	26.5464	73.7244									92.4891	35.396	32.6668	50.6384	29.5199	77.7054	83.2888	65.28	98.0689	53.7601	56.4006		36.3536	80.5924	46.4646	24.5895	42.2267	63.361	40.6533	28.7179	35.4697					39.9652	35.9202	53.6357	49.52	52.7354	60.7867	33.1516
		90	62.6156	34.1472	110.717	88.7316	41.0882	84.5108	84.8228	86.2764							115.27	55.3469	112.096	113.139	140.553	78.8194	142.278	144.959	110.794	111.984	164.758	80.0533		48.9406	75.6017	138.041	130.48	76.8163	100.171	108.211	123.216	99.8293	151.846	174.961			103.558	84.7387	161.677	190.032	81.0094	51.3801	43.906
		120	92.5621	79.0085	115.76	70.1225	92.0118	59.1901	88.7636								128.314	179.144	119.309	78.205	55.3529	160.028	103.099	41.8231						99.859	127.933	116.316	149.751	70.7428	57.19	104.625	107.752	112.146	137.911	150.943	99.6356		94.1423	79.188	132.083	117.056	158.274	59.9177	124.167
	D78	30		73.91	40.22	57.49	44.22	97.71	41.69	36.85	65.91									11.84	5.44	7.3	50.99	59.76	40.25	81.41	12	9.55	136.85	21.32	5.76
		60		6.85	12.78	5.96	9.14	9.67	9.64											0.74	5.33	1.4	2.85	4.73	3.11	4.06	3.43	1.13	6.05	1.71	3.73	5.11	3.8	4.74	6.08	3.75	2.53	4.55	1.93	15.92	14.63	15.81	20.84	16.44	30.67	59.34	26.13
		90		9.27	12.27	16.54	6.72	11.26	9.04	8.86	7.68	5.18	5.13	12.37	6.77	4.62	10.68	6.82		19.43	10.9	11.68	12.29	4.34	9.12	28.35	10.51	7.1	29.44	20.32	29.99	44	14.63	23.94
		120		8.97	4.51	5.41	7.83	8.34	8.93	8.64	7.06	6.54	12.74	4.64	4	8.88				16.74	10.78	12.6	7.9	25.96	12.1	15.25	6.84	17.96	8.67	3.57	5.55	10.97	12.85	21.4	18.14	6.18	25.49	13.85	74.89	112.15	113.35	95.31	16.37	54.89	42.57
Fig 2E	WT	30	91.72	1.14	39.7	159.26	190.54	135.38	214.68	33.01	39.57	94.99		102.06	73.62	80.61	110.15	118.84	87.08	59.22	130.79	98.42	139.21			120.31	79.94	93.9	58.87	111.53	169.5	45.94	110.29	134.9	74.82				59.21	98.8	94.78	169.94	110.4	55.42	58.4	204.42	42.98	85.81
		60	94.48	159.11	64.52	27.99	149.79	85.32	113.23	51.48	67.27	186.81		149.46	57.2	52.79	81.83	47.7	125.57	134.59	105.49	158.48	86.88			124	79.93	177.19	102.16	54.06	92.84	139.31	89.38	63.14	77.98				96.65	86.87	129.71	119.76	127.54	147.01	80.17	51.05	121.21	40.03
		90	74.1	80.8	21.66	101.77	55.5	179.95	144.22	66.78	137.36	137.86		98.29	47.2	95.59	96.48	119.85	67.21	121.32	123.61	94.48	95.49	140.49		73.43	44.89	69.35	126.63	119.69	70.46	91.89	99.26	113.03	91.57	139.29	160.49		101.57	83.11	158.58	186.39	79.46	50.39	43.06	114.02	127.38	91.61
		120	87.34	32.9	123.95	100.2	159.82	125.31	75.91	99.6	64.07	130.9		103.48	144.47	96.22	63.07	44.64	231.24	83.15	33.73					76.52	97.97	106.74	108.5	69.3	55.43	101.39	77.24	76.43	118.42	163.2	148.85		96.16	80.88	134.91	119.56	161.67	61.2	126.83	66.66	68.1	90.89
	D4.1	30	161.62	106.2	110.91	54.59	191.28	209.27	172.17	331.13	164.58	87.26		40.98	46.75	45.16	48.96	32.01	28.04	46.64	43.93	33.48	23.77		151.66	82.05	118.96	132.01	102.87	67.41	96.26	92.8	77.2	82.92			63.85	45.48	57.15	78.49	89.93	81.95	80.04	62.75
		60	65.88	57.91	42.61	49.37	67.5	132.3	81.74	70.25	57.05	78.15		40.03	50.72	68.06	65.15	67.33	60.99	70.86					125.34	83.87	74.05	124.68	115.57	65.7	86.53	52.6	62.41				53.8	45.59	87.87	63.07	75.69	31.96	30.5	39.48	22.76	107.48
		90	71.36	53.65	90.94	128.85	46.44	32.19	47.64	85.33	59.35	107.64		22.57	40.2	56.67	49.43	78.7	43.79	36.5	21.17	27.08	14.57		64.67	49.6	50.21	57.36	37.83	66.02	35.15	20.57	28.29	69.46	22.95		33.03	17.83	46.1	20.98	50.12	24.42	44.74	48.56	15.59
		120	37.11	19.34	51.81	43.89	29.31	65.31	22.43	37.69	24.86	78.51		59.09	31.75	59.02	36.8	42.48	69.86	28.13	28.46	22.96	56.01		20.81	39.16	14.92	17.57	47.05	23.67	40.04	31.27	26.68	30.21	30.61		55.29	35.62	42.2	37.19	53.58	31.52	83.79	38.68	47.07	58.44	79.86
	D7	30	37.93	38.24	44.57	106.99												68.33	35.79										144.25	107.17	237.09	68.94	120.82	103.75	87.83	50.06	96.25	76.22	85.1					90.07	82.47	114.26	49.99	113.8	117.95
		60	139.23	31.31	108.71	186.63	159.85	103.4	140.1	119.67	110.71	120.97	113.84	184.72				28.68	70.91	140.05	163.77	96.25	102.64						71.92	56.98	44.48	96.64	40.14	40.95	67.92	28.46	42.92	30.36	38.51	64.59				38.03	49.28	60.37	53.79	32.4	23.93
		90	38.69	74.42	28.2	58.07	54.55	42.47	99.75	57.58	35.32	70.18	83.77	98.84	99.22	76.2		134.9	35.64										26.98	29.32	30	26.65	29.36	98.5	169.93	169.42	114.28	42.76	31.01	49.5	30.69			55.98	104.26	34.86	63.79	89.14	74.29
		120	15.9	52.4	28.5	49.91	14.46	17.98	10.33									100.16	94.09	87.52	109.34	43.07	84.84	80.34	121.47	112.82	228.45		51.15	38.65	89.19	104.08	128.71	79.18	48.66	39.8	104.96	70.54	121.87	149.44	104.68	57.95		100.31	37.61	31.29	33.9	92.54	93.36
[truncated: 44 more columns]

## Sheet: IT
Fig 2G		GluA1	Δ78
		6.96068	0.208299
		12.4527	0
		13.0187	0
		2.56806	0
		21.4494	0.171857
		6.38783	1.30146
		6.79271	0
			1.26357
		4.10291	0.730706
			0.424815
			2.74512
		2.18553	0
		2.95796	0
		8.58718	2.61258
		11.1697	0.210235
		1.71267	0.354879
		20.2912	0.189897
		6.99369	0.278621
		12.3467	1.44676
		11.8915	0.852032
		9.83374	0.480921
			2.38031
		8.53813	1.16282
		0.279517	0.282238
		0.815468	1.92432
			0
		11.0247	0.404091
		52.5797	3.88295
		13.1069	1.97804
		25.3948	0
		41.3544	1.19099
		2.39459	1.08507
		25.5495
Fig 2H	Ves number	WT	Δ4.1N		Mean speed	IN/OUT WT	IN/OUT Δ4.1N		Move/Pause	WT, IN/OUT	WT, PAUSE	D4.1, IN/OUT	D4.1, PAUSE
		8.98301	6.47213			0.94315	1.40726			0.721	0.279	1	0
		17.7768	36.4556			1.11858	2.09017			1	0	1	0
		11.3392	13.2097			1.27615	1.40677			0.833	0.167	0.894	0.107
		5.75121	2.43674			1.45492	1.7605			0	1	1	0
		27.6363	3.63095			1.58845	2.32856			0.878	0.122	0.427	0.572
		50.3575	9.30208			2.05292	1.43724			0.853	0.146	0.146	0.854
		19.8172	6.1116			1.76651	1.9457			0.755	0.245	1	0
		3.46389	9.10379			1.03554	2.01539			0.445	0.555	0.597	0.402
		5.0782	9.64755			1.22275	1.25769			0.725	0.275	1	0
		10.9806				1.50923				1	0	1	0
		8.63783				1.47647				1	0	0.2	0.8
										1	0	0.124	0.876
										0.192	0.808	0.528	0.472
		1.78392	5.45453			1.6144	1.98806			0.542	0.459	0	1
		26.7577	0.292989			1.05669				0.622	0.378	1	0
		15.8394	0.238835			1.57086	1.712			0.661	0.34	1	0
		10.7681	5.44268			1.59193	1.30345			1	0	0.191	0.809
		9.32876	1.07948			1.23195	1.20125			0	1	1	0
		3.34511	5.68005			0.930667	1.27178			1	0	1	0
		11.9951				1.52415				0.667	0.333	1	0
		4.16348				0.976222				0.32	0.68	1	0
		9.97922				1.179				1	0	1	0
		6.75214				1.5232				0.656	0.344	1	0
										0.963	0.037	1	0
		23.5679	3.69371			1.44871	0.8735			1	0	0.368	0.632
		15.9246	1.621			1.20622	2.227			1	0	1	0
		57.6044	7.34369			2.41088	1.6485			0.676	0.324	1	0
		47.5492	3.86347			1.93479	1.94415			1	0	0.75	0.25
		25.9701	30.3631			1.70456	1.4078			1	0	0.9	0.1
		36.6319	25.6346			1.98362	1.54225			1	0	0.333	0.667
		24.3277	25.379			1.68481	1.13303			1	0	0	1
		7.48064	5.71662			1.0905	1.52485			1	0	1	0
		10.348				1.45104				0.571	0.429	1	0
										0.7	0.3	0.183	0.817
		24.5936	15.4498			1.78882	1.32109			1	0	0	1
		6.71006	3.11044			1.20767	1.76675			1	0	1	0
		42.5828	16.2044			2.22513	1.41275			0.556	0.444
		5.4329	22.8554			1.75057	1.88132					0.613	0.387
		61.5988	15.92			1.8455	2.31219			1	0	1	0
		6.76342	2.40427			1.59122	1.7168			1	0	1	0
		32.7699				1.87206				1	0	1	0
		26.6082				1.74804				0.162	0.838	0	1
		44.861				1.54617				1	0	1	0
		36.299				1.58351				1	0	1	0
		40.8068				1.6384				1	0	0.975	0.025
										1	0	1	0
		8.70732	21.4311			1.60992	2.0649			1	0	0.485	0.515
		25.016	2.31351			1.602	1.09167			1	0	1	0
		8.03777	14.1014			1.98975	1.73948			1	0	0	1
		7.25105	15.6856			1.48129	1.52542			0.683	0.317	1	0
		25.2631	16.1389			1.84079	1.52826			1	0	1	0
		6.43784	6.62196			2.17931	1.34578			1	0	0	1
		19.605	12.0459			1.51626	1.31817			1	0	1	0
		6.733	10.1943			1.62043	1.69723			0.408	0.591	1	0
		6.61196	7.88676			1.83576	1.89469			0.097	0.903	1	0
		7.53405	9.93297			0.652364	2.06307			0.163	0.837	1	0
		10.0524				1.10143				1	0	1	0
		8.67434				1.26246				0.845	0.155	1	0
		20.0665				1.67937				1	0	1	0
										1	0	1	0
										1	0	1	0
										1	0	1	0
						0.939778	1.478			0.666	0.333	0	1
						1.57565	2.17042			0.828	0.172	1	0
						1.26971	1.61766			0.464	0.535	0.233	0.767
						1.42244	1.23667			1	0	1	0
						1.65696	1.47692			0.886	0.114	0.531	0.469
						2.08645	1.69761			0.747	0.253	1	0
						1.71037	1.744			1	0	1	0
						0.975	1.80412			1	0	0.967	0.033
						1.40196	0.910111			0.796	0.205	1	0
						1.75209				1	0	1	0
						1.65858				0	1	1	0
										0.745	0.255	1	0
										1	0	1	0
						0.822667	1.0697			0.644	0.356	0.144	0.856
						1.71658				0.688	0.312	1	0
						1.40194				1	0	1	0
						1.56639	1.44369			0.471	0.528	1	0
						1.24196	0.67325			1	0	1	0
						1.0587	2.00508			1	0	0.762	0.238
						1.56182				1	0	1	0
						0.8856				1	0	0.843	0.158
						1.4383				1	0	1	0
						1.10514				1	0	1	0
										1	0	0.562	0.438
										0.869	0.131	0.352	0.648
						1.74877	2.31612			1	0	1	0
						1.8491	1.456			0.914	0.086	0.885	0.115
						2.25214	1.80713			1	0	0.936	0.064
						2.02941	2.0653			1	0	1	0
						1.81529	1.322			0.647	0.353	0.676	0.324
						1.9587	1.67991			1	0	1	0
						1.65532	1.45368			1	0	0.891	0.109
						1.28481	1.05806			0	1	1	0
						1.6865				0	1	1	0
										1	0	0.913	0.088
						2.21031	1.60628			1	0	1	0
						1.55394	1.65236			1	0	0.569	0.431
						2.23668	1.67877			0	1	1	0
						1.82969	2.15844			0.659	0.341	0.775	0.225
						2.02313	2.41543			0.421	0.579	0.928	0.072
						1.39503	0.832375			1	0	1	0
						1.87802				1	0	0.45	0.549
						1.79825				1	0	1	0
						1.84557				0	1	1	0
						2.08487				1	0	0.937	0.063
						1.95149				1	0	0.555	0.444
										0.833	0.167	1	0
										0	1	1	0
						1.63377	2.30996			1	0	1	0
						1.63002	0.66875			1	0	1	0
						1.78907	1.92616			1	0	1	0
						1.32743	1.87908			0.386	0.614	1	0
						1.76336	1.53682			0	1	1	0
						1.3508	2.04208			1	0	0.548	0.452
						1.39005	1.7365			0	1	1	0
						1.72984	1.89706			0.459	0.541	1	0
						1.35055	1.80378			1	0	1	0
						0.766091	2.12683			1	0	1	0
						1.1845				1	0	1	0
						1.25408				0.145	0.855	1	0
						1.56507				1	0	0.933	0.067
										0.387	0.613	1	0
										1	0	0.741	0.259
										1	0	1	0
												0.874	0.125
										0.115	0.885	1	0
										0.285	0.715	1	0
										0.889	0.111	1	0
										0.094	0.906	0	1
										1	0	1	0
										1	0	0	1
										1	0	0.641	0.359
										1	0	0	1
										1	0	1	0
										0.397	0.602	1	0
										0.916	0.084	0	1
										0.83	0.17	0.539	0.461
										0.793	0.207	0.952	0.048
										0.56	0.44	1	0
										0.471	0.53	1	0
										1	0	1	0
										1	0	1	0
										0.08	0.92	1	0
										0.5	0.5	1	0
										0.964	0.036	0.347	0.653
										0.967	0.033	1	0
										1	0	1	0
										1	0	1	0
										0.201	0.799	1	0
										1	0	1	0
										1	0	1	0
										0.825	0.175	1	0
										1	0	0.684	0.316
										0.5	0.5	1	0
										1	0	1	0
										0.113	0.887	1	0
										0.57	0.43	1	0
										0.18	0.82	0	1
										0.706	0.294	1	0
										1	0	0.433	0.567
										1	0	0.516	0.485
										0.395	0.605	1	0
										0	1	1	0
										0.375	0.625	1	0
										0	1	1	0
										0	1	1	0
										1	0	0	1
										1	0	1	0
										0.778	0.222	0	1
										0.558	0.442	1	0
												1	0
										1	0	1	0
										0.396	0.604	1	0
										0.491	0.509	1	0
										1	0	1	0
										0.089	0.911	0	1
										0.253	0.747	1	0
										1	0	1	0
										1	0	1	0
										1	0	0	1
										0.018	0.982	1	0
										0	1	1	0
										0.571	0.429	0	1
										1	0	0.7	0.3
										1	0	1	0
										1	0	1	0
										1	0	1	0
										0	1	0.262	0.738
										0.072	0.928	1	0
										1	0	1	0
										1	0	0	1
										1	0	1	0
										1	0	1	0
										1	0	1	0
										0	1	0.964	0.037
										1	0	1	0
										0.684	0.316	1	0
										1	0	1	0
												1	0
										0.24	0.76	1	0
										0.956	0.045	0.773	0.227
										0.938	0.062	1	0
										1	0	1	0
										1	0	1	0
										1	0	1	0
										1	0	1	0
										1	0	0.105	0.895
										0.312	0.688	0	1
										1	0	0.375	0.625
										1	0	0	1
										1	0	1	0
										1	0	1	0
										1	0	0.9	0.1
										1	0	1	0
										1	0	1	0
										1	0	1	0
										0.879	0.121	1	0
										1	0	1	0
										1	0	1	0
										1	0	1	0
										0.94	0.06	0.844	0.156
										1	0	0	1
										0.159	0.842	1	0
										1	0	1	0
										1	0	0.7	0.3
										1	0	1	0
										0.145	0.855	1	0
										0	1	0	1
										1	0	1	0
										1	0	1	0
										0.135	0.865	0.334	0.667
										1	0	1	0
										0.789	0.211	1	0
										0.892	0.108	1	0
										0.94	0.06	1	0
										0.803	0.197	0.351	0.649
										1	0	1	0
										1	0	1	0
										0.957	0.043	1	0
										0	1	1	0
										1	0	1	0
										1	0	1	0
										0.812	0.188	1	0
										1	0	1	0
										0.121	0.879
										0.129	0.871	0.706	0.294
										0.6	0.4	1	0
										1	0	0.944	0.056
										1	0	1	0
										0.803	0.197	0.505	0.495
										0.554	0.446	1	0
										1	0	1	0
										0.558	0.442	0.883	0.118
										1	0	1	0
										0.289	0.711	1	0
										1	0	1	0
										0.793	0.207	1	0
										1	0	0.221	0.779
										0	1	0.648	0.352
										0.409	0.591	0.823	0.177
										0.597	0.404	0.118	0.882
										1	0	1	0
										0	1	1	0
										1	0	1	0
										1	0	0.968	0.032
										0.066	0.934	1	0
										1	0	1	0
										1	0	1	0
										1	0	0.412	0.589
										0.14	0.86	0	1
										1	0	1	0
										1	0	0.692	0.309
										1	0	1	0
										1	0	1	0
										0	1	1	0
										1	0	0.941	0.059
										0.522	0.478	1	0
										0	1	1	0
										1	0	1	0
										1	0	1	0
										1	0	1	0
										0.242	0.759	1	0
										0	1	0	1
										0.773	0.227	0	1
										1	0	1	0
										1	0	1	0
										0.717	0.283	1	0
										0.699	0.301	1	0
										1	0	1	0
										0.333	0.667	0	1
										1	0	0.771	0.23
										0.136	0.864	1	0
										0.831	0.169	1	0
										1	0	1	0
										0	1	0.734	0.267
										0.789	0.211	1	0
										1	0	0	1
										0	1	0.725	0.276
										1	0	0.694	0.306
										1	0	1	0
										1	0	1	0
										1	0	1	0
										1	0	1	0
										0.357	0.643	1	0
										1	0	1	0
										1	0	1	0
										1	0	0.842	0.158
										0.504	0.496	0	1
										0	1	0	1
										1	0	1	0
										0.368	0.632	1	0
										0.21	0.79	0.312	0.688
										1	0	1	0
										0.228	0.773	1	0
										1	0	1	0
										1	0	1	0
										1	0	1	0
										1	0	0.308	0.692
										0.314	0.687	1	0
										1	0	0.474	0.526
										1	0	1	0
										1	0
										0	1	0.536	0.464
										1	0	0.263	0.737
										1	0	1	0
										0.389	0.611	0.897	0.103
										1	0	1	0
										1	0	1	0
										1	0	0.079	0.921
										0	1	1	0
										1	0	0.657	0.343
										0.492	0.508	0	1
										1	0	1	0
										0.643	0.357	1	0
										1	0	0	1
										1	0	0	1
										1	0	1	0
										1	0	1	0
										0.585	0.415
										0.524	0.476	0.339	0.661
										1	0	0.257	0.742
										1	0	0.222	0.778
										0	1	1	0
										0.355	0.645	1	0
										0.364	0.636	1	0
										1	0	1	0
										0		1	0
										0.752	0.248	0	1
										1	0	0.541	0.459
										1	0	1	0
										1	0	0.138	0.862
										1	0	0	1
										1	0	1	0
										1	0	1	0
										0.873	0.127	0	1
										1	0	0.75	0.25
										1	0	0	1
										0.71	0.29	1	0
										0.576	0.424	0	1
										0.514	0.486	0	1
										1	0	1	0
										0.926	0.074	0	1
										1	0
										0.343	0.658	0.839	0.161
										1	0	1	0
										1	0	0.794	0.205
										1	0	1	0
										0.82	0.179	0.883	0.117
										1	0	0.615	0.385
										1	0	1	0
										1	0	0.453	0.547
										1	0	1	0
										0.576	0.424	1	0
										0.107	0.893	1	0
										0.333	0.667	1	0
										1	0	1	0
										1	0	0	1
										1	0	0.45	0.55
										1	0	1	0
										1	0	1	0
										1	0	1	0
										1	0	1	0
										1	0	1	0
										1	0	0	1
										1	0	0	1
										1	0	0	1
										1	0	0	1
										0.388	0.612	1	0
										0.904	0.096	0.339	0.661
										1	0	1	0
										1	0	0.647	0.353
										0.644	0.356	1	0
										1	0	1	0
										1	0	1	0
										1	0	1	0
										1	0	1	0
										1	0	0	1
										1	0	1	0
										0.204	0.795	1	0
										0	1	1	0
										0.01	0.99	1	0
										1	0	1	0
										1	0	1	0
										1	0	1	0
										1	0	1	0
										1	0
										0.739	0.261	1	0
										1	0	1	0
										1	0	1	0
										0.938	0.062	0.26	0.74
										1	0	0.545	0.455
										1	0	0.884	0.116
										0.87	0.13	1	0
										1	0	0.157	0.842
										1	0	1	0
										1	0	1	0
										1	0	1	0
										1	0	1	0
										1	0	1	0
										1	0	1	0
										1	0	1	0
										1	0	0.761	0.238
										0.94	0.06	0.113	0.887
										1	0	1	0
										0.88	0.12	0.722	0.278
										1	0	1	0
										0.941	0.059	0.172	0.828
										1	0	1	0
										1	0	1	0
										1	0	1	0
										1	0	0	1
										0.621	0.379	0	1
										1	0	0.467	0.533
										1	0	1	0
										1	0	1	0
										1	0	0	1
										1	0	1	0
										1	0	1	0
										1	0	1	0
										0.8	0.2	0	1
										1	0	1	0
										1	0	0.11	0.89
										1	0	1	0
										1	0
										0.279	0.721	0.113	0.887
										1	0	1	0
										1	0	1	0
										1	0	1	0
										1	0	1	0
										0.445	0.556	0.116	0.884
										1	0	1	0
										1	0	1	0
										1	0	1	0
										1	0	1	0
										1	0	1	0
										0.372	0.628	1	0
										1	0	0.5	0.5
										0.407	0.593	1	0
										1	0	1	0
										0.737	0.263	0.667	0.333
										1	0	1	0
										1	0	0.755	0.245
										0.926	0.074	1	0
										0.477	0.523	1	0
										0.815	0.185	1	0
										1	0	1	0
										1	0	1	0
										1	0	1	0
										1	0	0.422	0.578
										1	0	1	0
										1	0	0.419	0.581
										0	1	0	1
										1	0	1	0
										1	0	1	0
										0	1	1	0
										1	0	1	0
										1	0	1	0
										0.222	0.778	1	0
										1	0	1	0
										1	0	0.156	0.844
										0.32	0.68	0	1
										0.562	0.438	0	1
										1	0	1	0
										1	0	0	1
										1	0	1	0
										1	0
										1	0	1	0
										0.478	0.522	1	0
										1	0	0.559	0.442
										1	0	0.607	0.393
										1	0	0	1
										0.615	0.385	1	0
										1	0	0	1
										0	1	1	0
										0	1	0.083	0.917
										1	0	0.467	0.533
										1	0	1	0
										0.076	0.924	0.224	0.776
										0.035	0.965	1	0
										0.364	0.636	1	0
										0.238	0.762	1	0
										1	0	1	0
										1	0	0.576	0.424
										0.85	0.15	1	0
										1	0	0	1
										1	0	0	1
										0	1	0	1
										1	0	0	1
										1	0	0.224	0.776
										0.533	0.467	0	1
										1	0	1	0
										1	0	0.872	0.128
										0.865	0.135	1	0
										1	0	1	0
										1	0	1	0
										1	0	0	1
										1	0	1	0
										1	0	1	0
										1	0	1	0
										0.37	0.63	1	0
										1	0	0.148	0.852
										1	0	1	0
										1	0	1	0
										0.383	0.617	1	0
										0.119	0.881	1	0
										1	0	1	0
										0.148	0.852	1	0
										0	1
										0.636	0.364
										1	0
										1	0
										1	0
										1	0
										1	0
										1	0
										1	0
										1	0
										1	0
										1	0
										1	0
										1	0
										1	0
										0.216	0.784
										0	1
										1	0
										1	0
										0.733	0.267
										0.422	0.578
										0.6	0.4
										1	0
										1	0
										0.303	0.697
										0.571	0.429
										0.857	0.143
										0.364	0.636
										0.491	0.509
										1	0
										1	0
										1	0
										1	0
										1	0
										1	0
										1	0
										1	0
										0	1
										0.048	0.952
										1	0
										1	0
										1	0
										1	0
										1	0
										0.714	0.286
										0.429	0.571
										1	0
										1	0
										1	0
										1	0
										0	1
										1	0
										1	0
										0.5	0.5
										1	0
										1	0
										1	0
										1	0
										1	0
										1	0
										1	0
										1	0
										1	0
										1	0
										1	0
										1	0
										1	0
										1	0
										1	0
										1	0
										1	0
										1	0
										0.742	0.258
										0.868	0.132
										0.94	0.06
										0.124	0.876
										0.48	0.521
										0.694	0.306
										0.965	0.035
										1	0
										1	0
										0.4	0.6
										1	0
										0.829	0.172
										0.717	0.283
										1	0
										0.738	0.262
										1	0
										1	0
										0.408	0.592
										0.931	0.069
										1	0
										1	0
										0.375	0.625
										0.148	0.852
										1	0
										0.833	0.167
										1	0
										0.549	0.452
										1	0
										0.414	0.585
										1	0
										1	0
										1	0
										0.815	0.185
										1	0
										1	0
										1	0
										0.633	0.367
										0.955	0.045
										0.308	0.692
										0.2	0.8
										1	0
										0.708	0.292
										1	0
										1	0
										1	0
										0.637	0.364
										1	0
										0.071	0.929
										0.633	0.367
										0.563	0.437
										1	0
										1	0
										1	0
										0	1
										1	0
										0.614	0.386
										0	1
										1	0
										0.688	0.312
										0.195	0.806
										1	0
										0	1
										0.048	0.952
										1	0
										1	0
										1	0
										0.378	0.622
										0.859	0.14
										1	0
										1	0
										1	0
										0.56	0.44
										0	1
										1	0
										1	0
										0	1
										0.385	0.615
										1	0
										1	0
										1	0
										0.545	0.456
										1	0
										0.105	0.895
										0	1
										0	1
										0	1
										1	0
										1	0
										1	0
										0.452	0.548
										0.625	0.375
										1	0
										1	0
										1	0
										0.915	0.085
										0.522	0.477
										0.13	0.87
										0.217	0.783
										0.702	0.298
										0.744	0.256
										0.53	0.47
										0.092	0.908
										0.03	0.97
										0.5	0.5
										1	0
										1	0
										1	0
										0.692	0.308
										0.842	0.158
										0	1
										0	1
										0	1
										0	1
										0	1
										0	1
										0.398	0.602
										0.597	0.403
										1	0
										0.447	0.552
										1	0
										1	0
										0.545	0.455
										1	0
										1	0
										0.75	0.25
										1	0
										1	0
										0.271	0.729
										0.793	0.207
										1	0
										1	0
										1	0
										0.667	0.333
										0.925	0.075
										1	0
										1	0
										1	0
										1	0
										0.58	0.419
										1	0
										1	0
										1	0
										0	1
										0.397	0.603
										0	1
										0	1
										0.537	0.463
										1	0
										1	0
										0.654	0.346
										0.434	0.567
										1	0
										0.814	0.187
										1	0
										0.274	0.726
										0.86	0.14
										1	0
										0.948	0.051
										0.871	0.129
										0.359	0.641
										1	0
										0	1
										1	0
										0.715	0.286
										1	0
										1	0
										1	0
										1	0
										0	1
										0.524	0.476
										1	0
										0.257	0.743
										0.13	0.87
										1	0
										0.348	0.652
										0	1
										0.878	0.122
										1	0
										1	0
										1	0
										1	0
										1	0
										0.597	0.403
										1	0
										0.929	0.07
										1	0
										0.237	0.763
										1	0
										1	0
										0	1
										1	0
										0.953	0.047
										1	0
										0.5	0.5
										0.083	0.917
										1	0
										0.463	0.538
										1	0
										1	0
										1	0
										1	0
										1	0
										1	0
										1	0
										1	0
										0.451	0.549
										0.214	0.786
										0.214	0.786
										0	1
										1	0
										1	0
										1	0
										1	0
										0.613	0.387
										1	0
										0.274	0.726
										1	0
										1	0
										0.106	0.894
										1	0
										1	0
										1	0
										1	0
										1	0
										1	0
										1	0
										0.566	0.434
										1	0
										0.131	0.869
										1	0
										1	0
										1	0
										0.27	0.729
										0	1
										1	0
										0	1
										1	0
										0	1
										1	0
										1	0
										1	0
										0.379	0.621
										0.159	0.841
										0.636	0.364
										1	0
										1	0
										0	1
										0	1
										0.81	0.19	0.697	0.303
										1	0	1	0
										0.278	0.721	0.592	0.408
										0.366	0.633	0	1
										0.433	0.567	0.441	0.559
												0.961	0.039
										0.117	0.883	0.674	0.327
										0.364	0.636	0	1
										0.638	0.361	0.617	0.383
										1	0	0.543	0.457
										0.92	0.08	0.238	0.762
										0.42	0.58	0.16	0.84
										1	0	1	0
										0.447	0.553	0.245	0.754
										1	0	1	0
										1	0	1	0
										1	0	0.652	0.348
										1	0	0.414	0.586
										1	0	1	0
										1	0	1	0
										0.943	0.057	0.167	0.834
										1	0
										1	0	0	1
										0.652	0.348
										1	0	1	0
										1	0
										0.547	0.453	0.968	0.032
										1	0	1	0
										1	0	1	0
										0.951	0.049	1	0
										1	0	1	0
										0.586	0.414	0	1
										0.579	0.421	0.945	0.055
										1	0	0.354	0.646
										1	0	0.546	0.454
										0.725	0.275	1	0
										1	0	1	0
										1	0	1	0
										0.381	0.619	1	0
										1	0	1	0
										0.883	0.117	1	0
										1	0	0.757	0.244
										1	0	0.188	0.812
										1	0	1	0
										0	1	1	0
										0.786	0.214
										1	0	1	0
										1	0	1	0
										1	0	0.124	0.876
										1	0	0.73	0.27
										1	0	1	0
										0.592	0.408
										0.346	0.654	0.683	0.317
										0.193	0.807	0.491	0.509
										0.75	0.25	1	0
										0.119	0.881	0.407	0.593
										1	0	0.214	0.786
										1	0	1	0
										0.052	0.948	1	0
										1	0	1	0
										0.082	0.918	0.225	0.775
										1	0	1	0
										1	0	1	0
										1	0	0.533	0.467
										1	0	1	0
										0.307	0.692	0.667	0.333
										1	0	1	0
										1	0	1	0
										0.5	0.5	0.667	0.333
										0.375	0.625	0	1
										0	1
										0.62	0.379
										1	0
										0.385	0.615
										1	0
										0.2	0.8
										0	1
										1	0
										1	0
										0.814	0.186
										0	1
										0.36	0.64
										1	0
										0.812	0.188
										1	0
										1	0
										1	0
										1	0
										1	0
										1	0
										0.164	0.836
										1	0
										1	0
										1	0
										0.882	0.118
										0.5	0.5
										1	0
										0.159	0.841
										1	0
										0	1
										0.217	0.783
										0.423	0.577
										1	0
										0.825	0.175
										0.044	0.956
										0	1
										1	0
										1	0
										1	0
										1	0
										1	0
										0.875	0.125
										0.925	0.075
										1	0
										0.988	0.013
										0.938	0.062
										0.197	0.803
										0.899	0.101
										0.875	0.125
										1	0
										1	0
										1	0
										0.12	0.88
										0.08	0.92
										0.507	0.493
										1	0
										1	0
										1	0
										0.752	0.247
										1	0
										0.781	0.219
										0.182	0.818
										0.959	0.042
										0.81	0.19
										0.475	0.525
										0.571	0.43
										0.773	0.227
										0	1
										0.863	0.137
										1	0
										0.667	0.333
										0	1
										1	0
										1	0
										1	0
										1	0
										0.352	0.648
										1	0
										1	0
										1	0
										1	0
										1	0
										1	0
										0	1
										0.531	0.469
										0.615	0.385
										0	1
										0.7	0.3
										1	0
										1	0
										0.301	0.699
										0.302	0.698
										1	0
										0.963	0.037
										0.32	0.68
										0.382	0.618
										1	0
										1	0
										1	0
										0.118	0.882
										0.076	0.924
										0.365	0.636
										1	0
										1	0
										0.392	0.608
										0.658	0.342
										0.889	0.111
										1	0
										0.533	0.467
										0.957	0.043
										1	0
										1	0
										1	0
										0.094	0.906
										0.334	0.665
										0.258	0.742
										1	0
										0.094	0.906
										0.682	0.319
										1	0
										0.346	0.654
										1	0
										0.468	0.533
										1	0
										0.529	0.471
										1	0
										0.176	0.824
										0.903	0.098
										0.914	0.086
										1	0
										1	0
										1	0
										1	0
										1	0
										0	1
										0.797	0.204
										1	0
										1	0
										1	0
										1	0
										0	1
										1	0
										0.859	0.141
										0.024	0.976
										0.185	0.815
										0.93	0.07
										0.889	0.111
										1	0
										0.222	0.778
										1	0
										1	0
										0.937	0.063
										0.314	0.686
										0.959	0.041
										0.105	0.895
										1	0
										1	0
										0.694	0.306
										0.25	0.751
										1	0
										1	0
										0.154	0.846
										0.115	0.885
										0.202	0.798
										0.183	0.817
										0.169	0.831
										0.136	0.864
										1	0
										0.321	0.679
										0.356	0.644
										0.136	0.864
										1	0
										0	1
										0	1
										0	1
										0	1
										0	1
										0.709	0.292
										1	0
										0	1
										0	1
										0	1
										1	0
										1	0
										1	0
										0.421	0.579
										1	0
										1	0
										0.663	0.337
										0.347	0.653
										0.973	0.027
										0.074	0.926
										0.103	0.897
										0.234	0.766
										1	0
										1	0
										1	0
										1	0
										1	0
										0.959	0.041
										1	0
										0.942	0.058
										0.875	0.125
										0.303	0.697
										1	0
										0.649	0.351
										0.452	0.548
										0.537	0.464
										0	1
										1	0
										0.944	0.056
										1	0
										1	0
										0.891	0.109
										1	0
										0.245	0.755
										0.015	0.985
										0.232	0.768
										0.765	0.234
										0.728	0.271
										1	0
										1	0
										0.119	0.881
										1	0
										1	0
										0.079	0.92
										1	0
										0.85	0.15
										0	1
										1	0
										0.862	0.138
										0.911	0.089
										0.366	0.634
										1	0
										1	0
										1	0
										0.14	0.86
										1	0
										1	0
										0.453	0.547
										1	0
										1	0
										0.71	0.29
										1	0
										1	0
										0.733	0.267
										0.245	0.755
										1	0
										0.383	0.617
										0.25	0.75
										1	0
										0
										0.189	0.812
										0.83	0.17
										0.458	0.542
										1	0
										1	0
										0.457	0.543
										0	1
										1	0
										0.345	0.655
										0.898	0.102
										1	0
										0	1
										0.445	0.555
										0.074	0.926
										0.046	0.954
										0	1
										0.218	0.782
										1	0
										0.968	0.032
										0.151	0.849
										0.118	0.882
										1	0
										0.85	0.15
										1	0
										0	1
										0.189	0.811
										0.382	0.618
										1	0
										0.833	0.167
										1	0
										0.194	0.806
										0.369	0.631
										1	0
										1	0
										1	0
										1	0
										1	0
										1	0
										0.051	0.949
										1	0
										0.396	0.604
										1	0
										1	0
										0.519	0.481
										1	0
										0.43	0.57
										0
										0.717	0.283
										1	0
										0.942	0.058
										1	0
										1	0
										0.103	0.897
										0.974	0.026
										0	1
										0.34	0.66
										0.152	0.848
										1	0
										1	0
										1	0
										1	0
										0.071	0.929
										1	0
										1	0
										1	0
										1	0
										1	0
										1	0	1	0
										1	0	0.745	0.255
										0.722	0.278	1	0
										0.52	0.48	1	0
										1	0	0	1
										0.241	0.759	1	0
										0.533	0.467	1.001	0
										0.827	0.173	1	0
										1	0	1	0
										0.862	0.138	0.854	0.146
										0.688	0.312	0
										1	0	1	0
										1	0	1	0
										0.369	0.63	1	0
										1	0	1	0
										0.957	0.043	1	0
										1	0	1	0
										1	0
										1	0	1	0
										0.837	0.163	0.333	0.667
										0.812	0.188	1	0
										1	0	0.375	0.624
										1	0	1.001	0
										1	0	0.954	0.046
										1	0	0.511	0.489
										1	0	0.763	0.237
										0.704	0.296	1	0
										1	0	1	0
										0.108	0.892	1	0
										1	0	1	0
										1	0	0	1
										1	0	0.45	0.55
										0.364	0.636	0.5	0.5
										0	1	0.122	0.878
										0.643	0.357	0.356	0.644
										0.918	0.082	0.647	0.353
										0.733	0.267	1	0
										0	1	0.895	0.105
										0.711	0.289	0.297	0.703
										1	0	1	0
										0.9	0.1	1	0
										0	1	1	0
										1	0	0.182	0.818
										0.724	0.276	1	0
										0.456	0.544
										0.635	0.365	1	0
										1	0	1	0
										1	0	1	0
										0.263	0.737	0.77	0.231
										1	0	1	0
										0.343	0.657	1	0
										0.6	0.4	1	0
										0.541	0.458	1	0
										0.625	0.375	0.446	0.554
										1	0	1	0
										1	0	1	0
										1	0	1	0
										0.464	0.536	0.33	0.67
										1	0	0.393	0.607
										1	0	0.977	0.023
										0.416	0.583	1	0
										1	0	0.846	0.154
										1	0	0.786	0.214
										0.737	0.263	0.856	0.144
										0.717	0.282	1	0
										0.667	0.333	1	0
										0	1	1	0
										0	1	1	0
										1	0	0.629	0.371
										1	0	1	0
										1	0	0.728	0.273
										1	0	0.826	0.174
										1	0	0.712	0.288
										1	0	0.686	0.314
										1	0	0.92	0.081
										1	0	0.911	0.089
										1	0	0.757	0.242
												1	0
										1	0	0.684	0.316
										1	0	1	0
										0.33	0.669	0.733	0.267
										1	0	1	0
										0.826	0.174	0.444	0.556
										0.282	0.718	1	0
										0.425	0.575	0.364	0.636
										0.743	0.256	0.94	0.06
										0.492	0.508	1	0
										1	0	0.377	0.623
										1	0	0.5	0.5
										1	0	0.957	0.043
										0.657	0.343	0.31	0.69
										1	0	0.32	0.68
										0.878	0.122	0.4	0.6
										0.588	0.412	0	1
										0.818	0.182	0.66	0.341
										1	0	1	0
										0.329	0.671	1	0
										1	0	0.625	0.375
										1	0	0.227	0.773
										1	0	1	0
										1	0	1	0
										0.857	0.143	0.625	0.375
										1	0	1	0
										0.558	0.441	0.909	0.091
										1	0	1	0
										1	0	1	0
										1	0	1	0
										0.778	0.222	1	0
										1	0	1	0
										0	1	0.667	0.333
										0.185	0.815	1	0
										1	0	0.917	0.083
										1	0	1	0
										1	0	1	0
										0.333	0.667	1	0
										0.388	0.612	1	0
										1	0	1	0
										1	0	1	0
										1	0	1	0
										0.491	0.509	1	0
										1	0	0.096	0.904
										1	0	1	0
										1	0	1	0
										0.15	0.85	1	0
										1	0	1	0
										1	0	1	0
										1	0	1	0
										1	0	1	0
										0.618	0.382	1	0
										1	0	1	0
										0.812	0.188	1	0
										0	1	0.652	0.348
										0.042	0.958	1	0
										0.15	0.85	1	0
										0.302	0.698	1	0
										0.476	0.524	0	1
										0.8	0.2	0.214	0.786
										1	0	1	0
										1	0	1	0
										0.25	0.75	1	0
										1	0	1	0
										0.386	0.615	1	0
										1	0	1	0
										0.481	0.519	0.913	0.088
										0.096	0.903	0.333	0.667
										0	1	1	0
										0.616	0.385	1	0
										1	0	1	0
										0.182	0.818	0.281	0.72
										1	0	1	0
										1	0	1	0
										1	0	1	0
										1	0	0.605	0.395
										0.786	0.214	1	0
										0.667	0.333	0.259	0.741
												1	0
										0.146	0.854	1	0
										0.989	0.011	1	0
										0.743	0.257	0	1
										0.2	0.8	1	0
										0.851	0.149	1	0
										1	0	1	0
										0.875	0.125	1	0
										1	0	1	0
										1	0	0.333	0.667
										1	0	1	0
										1	0	1	0
										1	0	1	0
										1	0	1	0
										1	0	1	0
										0.847	0.154	1	0
										0.88	0.12	1	0
										0.429	0.571	0.485	0.515
										1	0	0.769	0.231
										1	0	0.788	0.212
										0.481	0.519	1	0
										0.193	0.807	1	0
										1	0	0.846	0.154
										1	0	1	0
										1	0	0.803	0.197
										0.879	0.121	1	0
										0.929	0.071	0.467	0.533
										1	0	1	0
										0.917	0.083	0.579	0.421
										0.854	0.146	1	0
										1	0	1	0
										1	0	1	0
										1	0	1	0
										0.518	0.482	0.462	0.538
										0.8	0.2	0.285	0.714
										1	0	1	0
										1	0	1	0
										1	0	1	0
										1	0	1	0
										1	0	0.676	0.324
										1	0	1	0
										0.857	0.143	1	0
										1	0	0	1
										1	0	1	0
										0.857	0.143	1	0
										1	0	0.75	0.25
										1	0	1	0
										1	0	1	0
										0.889	0.111	1	0
										0.605	0.395	1	0
										0.352	0.649
										1	0	1	0
										0.818	0.182	1	0
										0.728	0.273	0.778	0.222
										1	0	1	0
										0.818	0.182	0	1
										0.725	0.275	1	0
										0.935	0.065	0.773	0.227
										0.334	0.667	0.384	0.616
										1	0	0	1
										0.103	0.897	0.109	0.891
										1	0	1	0
										0.591	0.409	0.301	0.698
										1	0	0.175	0.825
										1	0	0.444	0.556
										1	0	0.5	0.5
										1	0	1	0
										1	0	1	0
										1	0	1	0
										0.833	0.167	0.216	0.784
										0.909	0.091	1	0
										0	1
										1	0	0.97	0.03
										1	0	0.375	0.625
										1	0	0.815	0.184
										1	0	1	0
										1	0	1	0
										1	0	1	0
										0.231	0.769	0.895	0.105
										0.217	0.783	1	0
										0	1	1	0
										1	0	1	0
										1	0	0.769	0.231
										0.808	0.192	0.5	0.5
										1	0	0.863	0.137
										1	0	0.144	0.856
										1	0	1	0
										1	0	1	0
										1	0	1	0
										1	0	1	0
										0.8	0.2	0.632	0.368
										1	0	1	0
										1	0	1	0
										1	0	1	0
										0.724	0.276	1	0
										0.455	0.545	1	0
										1	0	1	0
										1	0	0.486	0.514
										0.418	0.582	0.147	0.853
										0.667	0.333	0.584	0.416
										1	0	1	0
										0.407	0.593	1	0
										1	0	0.333	0.667
										1	0	1	0
										1	0	1	0
										1	0	0.375	0.625
										0.644	0.356	1	0
										0	1	1	0
										1	0	1	0
										1	0	1	0
										0.909	0.091	0.381	0.619
										0.222	0.778	1	0
										1	0	1	0
										1	0	0.231	0.769
										0	1	0.667	0.333
										1	0	0.933	0.067
										1	0	0.667	0.333
										1	0	1	0
										1	0	1	0
										1	0	0.88	0.121
										1	0	1	0
										0.666	0.333	1	0
										0.912	0.088	1	0
										1	0	0.733	0.267
										1	0	1	0
										0.81	0.19	0.745	0.255
										1	0	0.93	0.07
										1	0	0.447	0.553
										1	0	1	0
										1	0	1	0
										0.703	0.296	1	0
										1	0	1	0
										0.368	0.632	1	0
										1	0	1	0
										1	0	1	0
										1	0	1	0
										1	0	1	0
										1	0	1	0
										0.24	0.76	1	0
										1	0	1	0
										0.812	0.188	0.643	0.357
										1	0	0.5	0.5
										1	0	1	0
										1	0	1	0
										0.847	0.154	1	0
										1	0	0.667	0.333
										0	1	0.094	0.906
										0	1	0.647	0.354
										1	0	1	0
										0	1	1	0
										1	0	0	1
										1	0	1	0
										1	0	0.342	0.657
										1	0	0.944	0.057
										1	0	1	0
										1	0	1	0
										1	0	0.224	0.776
										1	0	1	0
										1	0	1	0
										1	0	1	0
										0.109	0.891	1	0
										1	0	1	0
										0.357	0.643	1	0
										0.444	0.556	1	0
										1	0	0.5	0.5
										0	1	0.59	0.411
										1	0	1	0
										0.423	0.577	1	0
										1	0	1	0
										1	0	0.849	0.152
										1	0	1	0
										0.194	0.806	0.278	0.722
										1	0	1	0
										1	0	0.5	0.5
										0.742	0.258	1	0
										1	0	1	0
										1	0	1	0
										1	0	0	1
										1	0	1	0
										0	1	1	0
										0.429	0.571	0.592	0.407
												1	0
										1	0	1	0
										0.958	0.042	0.714	0.286
										1	0	0	1
										1	0
										0.511	0.488	1	0
										1	0	0.511	0.489
										1	0	0.519	0.481
										1	0	0.8	0.2
										1	0	1	0
										1	0	1	0
										0.81	0.19	1	0
										1	0	1	0
										1	0	0.611	0.389
										0.381	0.619	0.75	0.25
										1	0	1	0
										0.87	0.13	0.756	0.244
										1	0	0.605	0.395
										1	0	0	1
										1	0	1	0
										0.923	0.077	1	0
										0.846	0.154	1	0
										1	0	0.52	0.48
										0.688	0.312	1	0
										1	0	1	0
										0.44	0.56	0.405	0.596
										1	0	0.044	0.956
										1	0	1	0
										1	0	1	0
										0.375	0.625	1	0
										1	0	0.746	0.255
										1	0	1	0
										1	0	0.367	0.633
										1	0	1	0
										0.55	0.45	1	0
										1	0	0.44	0.56
										1	0	0.958	0.042
										1	0	1	0
										1	0	1	0
										0.171	0.829	0.655	0.345
										1	0	1	0
										1	0	0.885	0.115
										1	0	0.543	0.457
										1	0	1	0
										0.506	0.494	0.333	0.667
										0.814	0.187	1	0
										1	0	0.926	0.074
										1	0	1	0
										0.232	0.768	1	0
										0.857	0.143	1	0
										1	0	0	1
										1	0	0.289	0.711
										1	0	0.684	0.316
										1	0	1	0
										1	0	1	0
										0.949	0.051	0.321	0.679
										1	0	0.66	0.34
										1	0	1	0
										1	0	1	0
										1	0	0	1
										0.833	0.167	0.193	0.807
										1	0	1	0
										1	0	0.615	0.385
										0.914	0.086	0.696	0.304
										1	0	0.961	0.039
										1	0	1	0
										0.391	0.609	0.562	0.438
										1	0	0.676	0.324
										1	0	1	0
										1	0	0.423	0.577
										1	0	1	0
										0.767	0.233	1	0
										1	0	0.119	0.881
										1	0	1	0
										1	0	0	1
										0.459	0.541	0	1
										0.769	0.231	1	0
										1	0	1	0
										0.429	0.571	0.214	0.786
										1	0	1	0
										1	0	1	0
										1	0	1	0
										1	0	1	0
										0.727	0.273	1	0
										1	0	0.222	0.778
										0.917	0.083	0.28	0.72
										1	0	0.786	0.214
										0.823	0.176	0.478	0.522
										0.75	0.25	0.467	0.533
										1	0	1	0
										1	0	0.921	0.079
										1	0	0	1
										1	0	0	1
										1	0	0	1
										1	0	1	0
										1	0	0.785	0.214
										0.013	0.987	0.537	0.463
										1	0	0	1
										0.583	0.417	0.737	0.263
										1	0	0.195	0.805
										1	0	1	0
										1	0	1	0
										1	0	1	0
										1	0	0	1
										1	0	0.375	0.625
										1	0	0.813	0.188
										1	0	1	0
										0	1	1	0
										0.017	0.983	1	0
										0.431	0.569	0.607	0.393
										1	0	1	0
										1	0	1	0
										1	0	1	0
										0.333	0.667	1	0
										0.04	0.96
										0.22	0.78	0.71	0.29
										1	0	0.168	0.832
										1	0	0.909	0.091
										1	0	0.573	0.427
										1	0	0.267	0.733
										1	0	1	0
										0.333	0.667	1	0
										0.562	0.438	1	0
										1	0	0.915	0.085
										1	0	0.852	0.148
										0.2	0.8	1	0
										1	0	1	0
										0.584	0.417	0.58	0.42
										1	0	0.644	0.356
										0.029	0.971	1	0
										1	0	0.553	0.447
										0	1	1	0
										0.143	0.857	0.5	0.5
										1	0	0.25	0.75
										1	0	1	0
										1	0	0.142	0.857
										1	0	0.134	0.866
										1	0	0.446	0.554
										1	0	1	0
										1	0	0.142	0.858
										1	0	1	0
										1	0	0.571	0.429
										1	0	0	1
										0.438	0.562
										1	0
										1	0
										1	0
										1	0
										1	0
										1	0
										1	0
										1	0
										1	0
										0	1
										1	0
										0.46	0.54
										1	0
										1	0
										0.692	0.308
										0	1
										0.118	0.882
										1	0
										0.75	0.25
										0	1
										0.641	0.359
										1	0
										0.632	0.368
										1	0
										0
										0.345	0.655
										1	0
										1	0
										1	0
										1	0
										0.891	0.109
										0.189	0.811
										1	0
										0.902	0.098
										1	0
										1	0
										0.808	0.191
										0.701	0.299
										1	0
										0.483	0.517
										0.932	0.068
										0.84	0.16
										1	0
										1	0
										0.405	0.595
										1	0
										1	0
										0.94	0.06
										0.688	0.312
										1	0
										1	0
										1	0
										0.889	0.111
										1	0
										0.524	0.476
										0.935	0.065
										0.941	0.059
										1	0
										1	0
										0.23	0.769
										1	0
										1	0
										0.606	0.394
										1	0
										1	0
										1	0
										0.194	0.806
										0.375	0.625
										1	0
										1	0
										1	0
										1	0
										0.085	0.915
										0.747	0.252
										1	0
										0.458	0.542
										1	0
										1	0
										0.097	0.903
										1	0
										1	0
										0.513	0.486
										1	0
										0.683	0.317
										0.676	0.324
										1	0
										1	0
										0.815	0.185
										0.463	0.537
										1	0
										1	0
										1	0
										0.5	0.5
										1	0
										0.467	0.533
										1	0
										1	0
										0.329	0.67
										1	0
										0.484	0.516
										0	1
										0.267	0.733
										1	0
										0.303	0.697
										1	0
										1	0
										1	0
										1	0
										1	0
										1	0
										1	0
										1	0
										0	1
										0.937	0.063
										0.333	0.667
										1	0
										0.688	0.312
										1	0
										1	0
										1	0
										0.773	0.227
										1	0
										0.116	0.884
										1	0
										0.432	0.568
										1	0
										0.37	0.63
										1	0
										0	1
										0.136	0.864
										1	0
										0	1
										0	1
										1	0
										1	0
										1	0
										0.944	0.056
										0.197	0.803
										0.772	0.228
										1	0
										1	0
										1	0
										0.125	0.875
										1	0
										1	0
										1	0
										0.446	0.554
										1	0
										0.8	0.2
										0.808	0.192
										1	0
										1	0
										0.512	0.488
										1	0
										1	0
										0	1
										1	0
										0.22	0.78
										0.75	0.25
										0.488	0.511
										1	0
										0.097	0.903
										1	0
										0.871	0.129
										1	0
										1	0
										0	1
										1	0
										1	0
										0.618	0.382
										1	0
										1	0
										0.839	0.161
										0.68	0.32
										1	0
										0.4	0.6
										1	0
										1	0
										1	0
										1	0
										1	0
										0	1
										1	0
										0.76	0.24
										0.424	0.576
										1	0
										0.667	0.333
										0.821	0.179
										1	0
										0.536	0.463
										1	0
										1	0
										0.6	0.4
										1	0
										0.821	0.179
										0.327	0.673
										0.137	0.863
										0	1
										0	1
										0.516	0.484
										1	0
										0.711	0.289
										0.263	0.737
										0	1
										1	0
										1	0
										1	0
										1	0
										0.49	0.51
										1	0
										1	0
										1	0
										1	0
										0.579	0.421
										0.49	0.51
										0.296	0.704
										1	0
										1	0
										1	0
										0.25	0.75
										0.583	0.417
										1	0
										1	0
										1	0
										0	1
										1	0
										1	0
										0.75	0.25
										1	0
										1	0
										0.483	0.517
										1	0
										1	0
										1	0
										0	1
										1	0
										0	1
										1	0
										1	0
										1	0
										0.5	0.5
										1	0
										0.692	0.308
										1	0
										1	0
										0.889	0.111
										1	0
[truncated: 4,904 more rows]
