# Supplementary material for: Regulation of different phases of AMPA receptor intracellular transport by 4.1N and SAP97
Source: eLife journal article supplement (doi:10.7554/elife.85609), 2023-04-06
Supplement: fig2-figsupp1-data1 [file sup Fig2- source data.xlsx]

## Sheet: Feuil1
Sup Fig 2A	% EC	D7, 90'	D4.1N, 90'	D7, 120'	D4.1N, 120'
		38.69	71.36	15.9	37.11
		74.42	53.65	52.4	19.34
		28.2	90.94	28.5	51.81
		58.07	128.85	49.91	43.89
		54.55	46.44	14.46	29.31
		42.47	32.19	17.98	65.31
		99.75	47.64	10.33	22.43
		57.58	85.33		37.69
		35.32	59.35		24.86
		70.18	107.64		78.51
		83.77
		98.84	22.57		59.09
		99.22	40.2		31.75
		76.2	56.67		59.02
			49.43		36.8
		134.9	78.7	100.16	42.48
		35.64	43.79	94.09	69.86
			36.5	87.52	28.13
			21.17	109.34	28.46
			27.08	43.07	22.96
			14.57	84.84	56.01
				80.34
			64.67	121.47	20.81
			49.6	112.82	39.16
			50.21	228.45	14.92
			57.36		17.57
		26.98	37.83	51.15	47.05
		29.32	66.02	38.65	23.67
		30	35.15	89.19	40.04
		26.65	20.57	104.08	31.27
		29.36	28.29	128.71	26.68
		98.5	69.46	79.18	30.21
		169.93	22.95	48.66	30.61
		169.42		39.8
		114.28	33.03	104.96	55.29
		42.76	17.83	70.54	35.62
		31.01	46.1	121.87	42.2
		49.5	20.98	149.44	37.19
		30.69	50.12	104.68	53.58
			24.42	57.95	31.52
			44.74		83.79
		55.98	48.56	100.31	38.68
		104.26	15.59	37.61	47.07
		34.86		31.29	58.44
		63.79		33.9	79.86
		89.14		92.54
		74.29		93.36
		46.13		32.77
		107.83		27.74
		84.24		119.03
		73.68		104.95
		69.94		32.93
		58.07		33.55
		30.35		25.87
				35.5
Sup Fig 2C	Mean speed	IN WT	IN Δ4.1N	OUT WT	OUT Δ4.1N		IN WT	IN Δ7	OUT WT	OUT D7
		0.94315	1.40726	0.939778	1.478		1.1887	1.73252	1.06886	1.79059
		1.11858	2.09017	1.57565	2.17042		1.65972	0.810769	1.97458	1.05147
		1.27615	1.40677	1.26971	1.61766		1.50712	1.323	1.41849	1.217
		1.45492	1.7605	1.42244	1.23667		1.67693	1.42228	1.63106	1.83199
		1.58845	2.32856	1.65696	1.47692		1.52297	1.54618	1.65474	1.67491
		2.05292	1.43724	2.08645	1.69761		1.50108	1.68917	1.41886	1.403
		1.76651	1.9457	1.71037	1.744		1.51686	1.7634	1.73467	1.78295
		1.03554	2.01539	0.975	1.80412		1.42948	1.41042	1.48127	1.35677
		1.22275	1.25769	1.40196	0.910111		1.56575	1.103	1.1737	0.599
		1.50923		1.75209			1.64369	0.658111	1.73351	1.13827
		1.47647		1.65858			1.40047		1.33208
							1.3382		1.19867
							1.60226		1.55038
		1.6144	1.98806	0.822667	1.0697		1.1355		1.1849
		1.05669		1.71658
		1.57086	1.30345	1.40194
		1.59193	1.27178	1.56639	1.44369				1.71227	1.38345
		1.23195		1.24196			1.48261	1.17241	1.62806	1.36751
		0.930667		1.0587	2.00508		1.23814	1.4662	1.57843	1.66845
		1.52415		1.56182			1.33475	0.802833	2.05478
		0.976222		0.8856			2.32717	1.9642	1.90633	1.53862
		1.179		1.4383			1.73217	1.48604	1.73207	1.1117
		1.5232		1.10514			1.58778	1.15469	1.72591	1.32609
							1.73679	1.45839	1.52805	1.90028
		1.44871	0.8735				1.71119	1.47184	1.22147	1.00431
		1.20622	2.227	1.74877	2.31612		1.10636	0.842455		1.10191
		2.41088	1.6485	1.8491	1.456			1.04009
		1.93479	1.94415	2.25214	1.80713				1.52708	1.007
		1.70456	1.4078	2.02941	2.0653		1.12575		1.77794	1.73054
		1.98362	1.54225	1.81529	1.322		1.62783	1.6397	0.8684	1.28511
		1.68481	1.13303	1.9587	1.67991		1.21133	1.13933	1.62109	1.04267
		1.0905	1.52485	1.65532	1.45368		1.43543	0.275	1.3099	1.69025
		1.45104		1.28481	1.05806		1.33112	1.1158	1.2034	0.912167
				1.6865			1.39941	0.6608	1.814	1.39979
		1.78882	1.32109				1.6435	1.14718	1.32185
		1.20767	1.76675	2.21031	1.60628		1.2239		1.41925
		2.22513	1.41275	1.55394	1.65236		1.87321
		1.75057	1.88132	2.23668	1.67877				1.045	1.42784
		1.8455	2.31219	1.82969	2.15844				1.69673	1.77186
		1.59122	1.7168	2.02313	2.41543		1.931	1.13345	1.85986	1.47591
		1.87206		1.39503	0.832375		1.616	1.86736	0.984364	1.47123
		1.74804		1.87802			2.2749	1.37638	1.20967	1.27059
		1.54617		1.79825				0.734		0.796036
		1.58351		1.84557			0.704	1.18488
		1.6384		2.08487				0.905833
				1.95149					1.45713
		1.60992	2.0649						1.90498
		1.602	1.09167				1.81857	0.735667	1.37127
		1.98975	1.73948	1.63377	2.30996		1.62719	0.49725	1.66789
		1.48129	1.52542	1.63002	0.66875		1.2471	1.32911	1.04085
		1.84079	1.52826	1.78907	1.92616		1.41946	1.14718	1.60147
		2.17931	1.34578	1.32743	1.87908		1.45787		0.793769
		1.51626	1.31817	1.76336	1.53682		1.33661	1.68967	1.70814
		1.62043	1.69723	1.3508	2.04208		1.43873	1.1175	1.3125	1.44467
		1.83576	1.89469	1.39005	1.7365		1.59811		0.883632	0.6902
		0.652364	2.06307	1.72984	1.89706		1.51484			1.61641
		1.10143		1.35055	1.80378		0.735625			1.17707
		1.26246		0.766091	2.12683
		1.67937		1.1845						1.199
				1.25408						0.7305
				1.56507
