# Supplementary material for: Regulation of different phases of AMPA receptor intracellular transport by 4.1N and SAP97
Source: eLife journal article supplement (doi:10.7554/elife.85609), 2023-04-06
Supplement: fig3-data1 [file Figure 3.xlsx]

## Sheet: Immuno
Fig 3E	A1-WT, 45'	A1-WT, 60'	A1-AA, 45'	A1-AA,60'	A1-DD, 45'	A1-DD, 60'
	147.47	104.74	65.21	46.78	100.59	87.04
	108.35	114.55	58.79	21.4	123.5	80.75
	147.26	154.58	74.3	53.01	56.68	21.34
	122.66	130.76	108.63	62.64	57.59	173.32
	81.77	79.94	79.66	93.73	19.03	88.25
	39.26	65	83.67	51.1	33.77	84.56
	122.8	102.03	19.1	59.29	31.58	92.75
	74.51	120.43	37.43	27.28	49.06	70.77
	88.33	160.81	31.44	30.51	40.6	42.74
	67.6	78.27	73.59	43.95	47.16	54.27
		35.18	76.41	33.28	156.49	75.79
		41.3			37.71	124.12
		112.41			46.1	109.76
	131.31	102.39
	163.75	140.91
	56.1	133.03
	139.2	108.36
	83.45	87.3
	97.13	88.09
	93.8	108.7
	50.84	115.8
	90.47	67.7
	112.38	68.49
	48.91	75.47
	102.39	116.02
	130.26	87.75
	64.56	176.04	64.19	23.91	52.88	60.36
	139.68	52.74	49.11	114.15	161.53	66.63
	36.05	69.03	60.42	94.17	97.97	145.39
	81.77	70.03	80.51	34.46	99.36	121.01
	55.52	96.98	44.21	33.29	22.73	86.73
	104.25	102.49	36.3	49.34	60.17	108.7
	115.94	86.2	33.54	57.25	143.07	80.22
	78.63	92.41	80.26	34.75	83.65	76.3
	156.26	120.37	41.58	27.6	90.56	146.74
	69.71	103.25	52.75	25.26	244.31	151.54
	123.09	175.04	23.24	32.41	66.95	111.99
	117.82	63.11	70.09	8.2	108.78	62.18
	92.2	92.3		10.2	30.9	70.73
	155.63					154.06
	108.9					70.85
	59.72	123.61	88.68	35.12	77.98	51.32
	125.31	86.79	90.95	24.37	182.66	77.63
	73.73	120.97	93.22	38.82	106.19	61.48
	82.62	67.12	66.25	18.44	101.36	78.22
	51.39	76.81	21.67	19.55	168.84	53.32
	56.22	49.39	69.18	38.35	53.66	77.1
	263.29	93.43	53.95	20.2	70.79	49.62
	121.9	65.83	28.01	21.9	54.61	64.12
	50.82	88.26	35.87	23.14	109.69	65.65
	69.56	98.65	28.2	14.97		91.02
	56.5	134	44.77	51.62		67.53
	177.07	73.99	80.54			160.02
	111.87	114.74				56.55
		206.41				131.36
						61.83

## Sheet: IT
Fig 3C	Ves number	WT	AA	DD	Fig 3C	Mean speed	IN/OUT, WT	IN/OUT, AA	IN/OUT, DD		Move / Paus	IN/OUT, WT	PAUSE WT	IN/OUT AA	PAUSE AA	IN/OUT DD	PAUSE DD
		10.4411		12.3164			1.81857		1.68502			1	0			1	0
		14.6806		36.8399			1.62719		1.94617			1	0			1	0
		16.2039		9.91262			1.2471		1.45887			1	0			0.944	0.056
		28.8556		26.7949			1.41946		1.38798			0.8	0.2			0.284	0.716
		10.6407		4.56037			1.45787		1.22167			0.538	0.462			0.884	0.116
		15.2062		43.3806			1.33661		1.40704			0.049	0.951			0.737	0.263
		5.94764		8.0269			1.43873		0.979091			0.201	0.799			0.667	0.333
		17.4927					1.59811					1	0			1	0
		11.6216					1.51484		2.14413			1	0			0.295	0.705
		7.97973					0.735625		2.05965			0.628	0.373			1	0
									1.38383			1	0			0.524	0.476
							1.45713		1.64921			1	0			0.306	0.694
		3.75185	13.4977	10.4099			1.90498		2.51289			0.753	0.247			0.372	0.628
		25.077	22.8094	61.6005			1.37127		1.73122			0.386	0.614			0.251	0.749
		1.26849	28.1621	5.11825			1.66789		1.29612			1	0			1	0
		0.987751	15.2043				1.04085					0.836	0.164			1	0
		2.82661	40.0965				1.60147					1	0			1	0
			11.0102				0.793769					1	0			0.195	0.805
			11.2502				1.70814					1	0			1	0
							1.3125					1	0			0.115	0.885
							0.883632					1	0			0.818	0.182
		23.5679	10.8492									1	0			0	1
		15.9246	31.8307				0.916778	1.39257	1.42378			0.913	0.087			1	0
		57.6044	25.0273				1.91012	2.23594	2.20004			1	0			1	0
		47.5492	5.99957				0.7194	2.0704	1.39173			1	0			1	0
		25.9701	2.07046				1.347	1.76564				1	0			1	0
		36.6319	24.9342				1.25162	1.74918	1.25628			1	0			1	0
		24.3277	63.288					1.37389	2.4189			0	1			0.727	0.273
		7.48064	10.7366				1.20391	1.492	1.1795			1	0			1	0
		10.348	24.6576				1.94076					1	0			0.903	0.097
			28.5369				1.021	1.53689				0.846	0.154			0.381	0.619
			11.1997				1.004	2.16185				0	1			1	0
							0.741273	2.27656				1	0			1	0
								1.67941				0.732	0.268			1	0
		1.78392	3.8729	11.037				1.73234				1	0			1	0
		26.7577	22.5287	7.02768				2.083				0.682	0.317			1	0
		15.8394	9.82962	30.3444				1.67833				1	0			1	0
		10.7681	12.4316	21.0898								1	0			1	0
		9.32876	16.0272	13.6663								1	0			1	0
		3.34511	12.9544				1.44871	1.41484				0.65	0.35			1	0
		11.9951					1.20622	1.34103				1	0			0.734	0.265
		4.16348					2.41088	1.84357				0.562	0.438			1	0
		9.97922					1.93479	1.45946				1	0			0.304	0.696
		6.75214					1.70456	0.950333				0.689	0.31			1	0
							1.98362	2.08702				0.667	0.333			1	0
							1.68481	1.6598				1	0			1	0
		51.4778	3.36002	30.7153			1.0905	1.36657				0.613	0.387			0.625	0.375
		27.012	6.02588	16.2494			1.45104	1.64368				1	0			1	0
		13.7586	7.9893	10.2973				1.67424				0.287	0.713			1	0
		19.8623	4.78219	10.9916			1.74877	1.40678				1	0			1	0
		29.1552	10.069	27.3852			1.8491					0.263	0.737			1	0
			3.42062	5.79598			2.25214	1.63778				1	0			0.794	0.206
			4.65286	35.7734			2.02941	1.66137				0.088	0.912			0.724	0.276
				32.3279			1.81529	2.20493				0	1			1	0
							1.9587	1.83683				1	0			0.95	0.05
							1.65532	0.955667				1	0			1	0
		5.08645		13.9696			1.28481	2.01209				1	0			0.504	0.496
		5.90518		18.3465			1.6865	2.20257				0.484	0.516			1	0
		10.0235		8.23104				1.53572				1	0			1	0
		3.23967		9.35166				1.59155								1	0
				11.3263				1.89586				1	0			1	0
				6.84124				1.484				1	0			0.333	0.667
												1	0			1	0
							1.6144	0.887111	1.32988			0.656	0.344			1	0
							1.05669	1.60514	1.20947			0.635	0.365			1	0
							1.57086	1.89365	1.17994			0.461	0.538			0.381	0.619
							1.59193	1.86444	1.62466			0.191	0.809			0.878	0.122
							1.23195	1.17144	1.53503			0.489	0.511			1	0
							0.930667	1.29575				0.625	0.375			1	0
							1.52415					0.831	0.169			0.099	0.901
							0.976222	0.822417	1.73397			1	0			1	0
							1.179	1.53608	1.75671			0.468	0.532			1	0
							1.5232	1.72566	1.56863			1	0			1	0
								2.01854	1.60131			1	0			0	1
							0.822667	1.22974	1.74536			1	0			1	0
							1.71658	1.565				0.654	0.346			1	0
							1.40194					0.895	0.105			0.532	0.468
							1.56639					0.523	0.477			0.892	0.109
							1.24196					1	0			0	1
							1.0587					1	0			0.714	0.286
							1.56182					1	0			0.548	0.452
							0.8856					1	0			1	0
							1.4383					1	0			1	0
							1.10514					0	1			0	1
												0	1			1	0
							1.86824	1.54925	2.01569			0.76	0.24			0.144	0.856
							1.41261	1.40109	1.55431			0.814	0.186			0.125	0.875
							2.00841	1.3125	2.54229			0.621	0.379			1	0
							1.87981	1.31275	2.5723			1	0			1	0
							2.2559	1.2614	1.66418			0.328	0.673			1	0
								1.44278	1.666			1	0			1	0
							2.12442	0.9725	1.68759			1	0			0.467	0.533
							1.54848		1.91491			1	0			0.6	0.4
							2.30234	1.3918				1	0			1	0
							1.82112	1.52375	2.61878			0.49	0.51			1	0
							2.43067	1.18663	1.94348			1	0
								1.3885	2.2762			1	0			0.217	0.783
								1.15097	2.42968			1	0			1	0
								1.1333	2.22903			0.904	0.096			0.308	0.692
								1.41612	1.31794			1	0			0.935	0.065
									1.60201			0.237	0.763			1	0
									2.16707			1	0			1	0
												1	0			1	0
							1.15187		1.54163			0	1			1	0
							1.89411		1.20072			0	1			1	0
							1.58808		1.59458			1	0			1	0
							0.57125		1.30985			1	0			1	0
									1.23863			0	1			1	0
							1.08742		1.98785			1	0			1	0
							1.3466					1	0			0.217	0.783
							1.54724		1.76712			1	0			1	0
							1.09186		1.12104			0.222	0.778			1	0
									1.65657			1	0			1	0
									1.53841			1	0			1	0
									1.71879			0.657	0.342			0.57	0.43
									2.10035			1	0			0.889	0.111
												0	1			0.765	0.235
												0	1			1	0
												1	0			0.971	0.029
												0.446	0.554			0.796	0.204
												1	0			1	0
																1	0
												1	0			1	0
												0.693	0.307			1	0
												1	0			1	0
												1	0			0.889	0.11
												1	0			0.958	0.042
												1	0			0.934	0.065
												1	0			0.887	0.114
												0.853	0.147			1	0
												0.762	0.238			0.875	0.125
												0.783	0.217			1	0
												0.533	0.467			0.828	0.172
												1	0			0.9	0.1
												0.471	0.529			1	0
												0.204	0.796			1	0
												1	0			1	0
												1	0			1	0
												1	0			0.88	0.12
												0.136	0.864			0	1
												1	0			1	0
												1	0			1	0
												1	0			1	0
												1	0			0.947	0.053
												1	0			1	0
												0.434	0.566			1	0
												1	0			0.722	0.278
												1	0			0	1
												1	0			0.928	0.071
												1	0			1	0
												0.831	0.169			1	0
												1	0			1	0
												0.808	0.192			1	0
												1	0			0.464	0.537
												0.505	0.495			0.21	0.79
												0.443	0.557			1	0
												1	0			1	0
												1	0			1	0
												0	1			0.585	0.415
												1	0			0.514	0.486
												0.926	0.074			1	0
												1	0			1	0
												0	1			1	0
												0.146	0.854			1	0
												0.905	0.094			1	0
												1	0			1	0
												0.245	0.755			1	0
												0	1			1	0
												0	1			1	0
												1	0			1	0
												0.395	0.605			1	0
												1	0			1	0
												1	0			0.312	0.688
												0	1			0.828	0.172
												1	0			0.383	0.617
												0	1			1	0
												1	0			1	0
												0	1			0.385	0.615
												1	0			1	0
												1	0			1	0
												1	0			1	0
												1	0			0.85	0.15
												1	0			0.676	0.324
												0.24	0.76			1	0
												1	0			0	1
												1	0			1	0
												1	0			0.188	0.812
												0.667	0.333			0	1
												1	0			0	1
																0	1
												0.923	0.077			1	0
												0.94	0.059			1	0
												1	0			1	0
												0.589	0.411			1	0
												1	0			0.608	0.391
												1	0			0.177	0.824
												1	0			1	0
												0.159	0.841			1	0
												1	0			1	0
												0.73	0.27			1	0
												1	0			1	0
												0.368	0.632			1	0
												1	0			1	0
												1	0			0	1
												0.932	0.067			1	0
												0.545	0.455			0.612	0.389
												0.504	0.496			1	0
												0.153	0.847			1	0
												0.489	0.511			1	0
												0	1			1	0
												1	0			1	0
												1	0			1	0
												0.943	0.057			0.7	0.3
												1	0			0	1
												0.924	0.076			1	0
												1	0			1	0
												1	0			0.5	0.5
												1	0			0	1
												0.182	0.818			1	0
												1	0			0.127	0.873
												1	0			1	0
												1	0			1	0
												1	0			1	0
												1	0			1	0
												1	0			0.916	0.083
												1	0			1	0
												1	0			0.714	0.286
												0.277	0.723			1	0
												1	0			1	0
												0.773	0.227			1	0
												1	0			0.556	0.444
												1	0			1	0
												1	0			1	0
												1	0			1	0
												1	0			1	0
												1	0			1	0
												0.621	0.379			1	0
												0.97	0.03			0	1
												0	1			1	0
												0	1			1	0
												0	1			0.556	0.444
												0	1			0	1
												0.301	0.699			1	0
												1	0			1	0
												1	0			1	0
												0.437	0.563			1	0
												0.797	0.203			0	1
												0.802	0.198			1	0
												1	0
												1	0			0.724	0.276
												0.577	0.424			0.815	0.185
												0.255	0.745			0.738	0.262
												1	0			0.638	0.362
												1	0			0.598	0.403
												0.315	0.685			1	0
												1	0			0.949	0.051
												1	0			0.773	0.227
												0	1			1	0
												1	0			0.283	0.717
												0	1			0.895	0.105
												0	1			0.867	0.133
												1	0			1	0
												1	0			1	0
												1	0			0.905	0.095
												1	0			0.319	0.681
												0.5	0.5			1	0
												1	0			0.483	0.518
												1	0			0.285	0.715
												1	0			1	0
												0	1			0	1
												0.5	0.5			0.305	0.695
												1	0			1	0
																1	0
												0.448	0.552			1	0
												1	0			1	0
												0.07	0.93			1	0
												0.555	0.445			0	1
												0.258	0.742			1	0
												0.502	0.497			1	0
												1	0			1	0
												1	0			1	0
												0.292	0.708			0.64	0.36
												0.592	0.408			0.383	0.617
												1	0			1	0
												1	0			0.374	0.626
												1	0			0	1
												0.449	0.551			0.624	0.376
												1	0			0.75	0.25
												1	0			0.294	0.706
												1	0			1	0
												1	0			1	0
												1	0			0.466	0.535
												1	0			1	0
												0.147	0.853			0	1
												0.723	0.277			0.634	0.366
												1	0			0.279	0.721
												1	0			1	0
												1	0			1	0
												1	0
												0.859	0.141			0.419	0.582
												0.659	0.341			0.539	0.461
												0.605	0.395			1	0
												0.179	0.821			0.074	0.926
												1	0			1	0
												0.936	0.064			1	0
												1	0			1	0
												1	0			0.955	0.045
												0.495	0.505			1	0
												1	0			1	0
												0	1			0.89	0.11
												0.999	0			0.903	0.097
												0.206	0.795			1	0
												1	0			1	0
												1	0			0	1
												0	1			0.767	0.233
												1	0			0.811	0.188
												0.698	0.302			1	0
												1	0			1	0
												0.741	0.259			0	1
												1	0			1	0
												1	0			0.676	0.324
												0	1			0	1
												0	1			0	1
												1	0			0.965	0.035
												0	1			0.806	0.195
												1	0			1	0
												1	0			1	0
												1	0			1	0
												1	0			0.809	0.191
												1	0			0.351	0.649
												0	1			1	0
												0.407	0.594			0.324	0.676
												1	0			0.211	0.789
												1	0			1	0
												1	0			1	0
												0	1			0.137	0.863
												1	0			0	1
												1	0			1	0
												0.827	0.173			1	0
												0	1			0.25	0.75
												0.08	0.92			1	0
												1	0			1	0
												1	0			1	0
												0.778	0.222			1	0
												1	0			0.667	0.333
												1	0			0.937	0.064
												1	0			0	1
												1	0			0	1
												0	1			0.563	0.436
												1	0			1	0
												1	0			1	0
																1	0
												0.535	0.465			0.06	0.94
												1	0			0.39	0.61
												0.888	0.112			1	0
												0.714	0.286			0.293	0.707
												0.163	0.837			0	1
												0	1			0.653	0.347
												0.537	0.462			0.207	0.793
												0.508	0.491			0	1
												1	0			1	0
												1	0			1	0
												0.456	0.544			1	0
												0.434	0.566			0.98	0.02
												0.825	0.175			1	0
												1	0			1	0
												1	0			1	0
												1	0			0.256	0.745
												0.723	0.278			1	0
												0.5	0.5			0.289	0.711
												1	0			0.833	0.167
												0.941	0.059			0.833	0.167
												1	0			0.833	0.167
												1	0			1	0
												0	1			0	1
												0.265	0.735			1	0
												0.8	0.2			0	1
												1	0			0	1
												0	1			0.788	0.212
												1	0			0	1
												0	1			0.5	0.5
												0.246	0.753			1	0
												1	0			1	0
												0	1			1	0
												0.368	0.632			1	0
												0.518	0.482			1	0
												0.387	0.613			0	1
												0.593	0.407			1	0
												0	1			1	0
												0.175	0.825			1	0
												1	0			1	0
												1	0			1	0
												1	0			1	0
												0	1			1	0
												1	0			1	0
												1	0			0	1
												1	0			1	0
												1	0			1	0
												1	0			1	0
												1	0			1	0
																1	0
												1	0			1	0
												1	0			0.731	0.269
												1	0			0	1
												0.549	0.451			1	0
												1	0			1	0
												1	0
												0.875	0.125			1	0
												0.86	0.14			0.133	0.867
												1	0			1	0
												1	0			1	0
												1	0			1	0
												1	0			1	0
												0.419	0.581			1	0
												1	0			1	0
												1	0			1	0
												1	0			0	1
												0.883	0.118			1	0
												0	1			1	0
												1	0			0	1
												0.342	0.659			0	1
												0.76	0.241			1	0
												0.93	0.07			1	0
												1	0			0.451	0.549
												0.971	0.029			1	0
												0.316	0.684			0.476	0.524
												1	0			1	0
												0.641	0.36			1	0
												1	0			1	0
												0.814	0.186			1	0
												1	0			1	0
												1	0			0.861	0.14
												1	0			0	1
												0.574	0.425			1	0
												1	0			1	0
												1	0			0.176	0.824
												1	0			1	0
												1	0			0	1
												0.919	0.081			0.328	0.672
												1	0			1	0
												0.634	0.366			1	0
												1	0			1	0
												0.528	0.472			0.644	0.356
												1	0			0.089	0.911
												0.859	0.14			0.88	0.12
												1	0			1	0
												0.882	0.118			0.544	0.456
												1	0			1	0
												0.769	0.231			1	0
												1	0			1	0
												1	0			1	0
												1	0			1	0
												1	0			1	0
												1	0			1	0
												1	0			1	0
												1	0			0.685	0.315
												0.828	0.172			1	0
												1	0			1	0
												1	0			1	0
												1	0			1	0
												0.62	0.38			1	0
												0.917	0.083			1	0
												0.866	0.133			1	0
												0	1			0.75	0.25
												1	0			0.482	0.518
												0.425	0.575			1	0
												1	0			0.566	0.434
												0.875	0.125			0	1
												0.838	0.163			0.881	0.119
												1	0			1	0
												0	1			1	0
												1	0			0.682	0.319
												0	1			1	0
												1	0			0.336	0.665
												1	0			1	0
												1	0			1	0
												1	0			1	0
												1	0			1	0
												1	0			1	0
												0.714	0.286			1	0
												1	0			0.192	0.808
												1	0			0.862	0.138
												1	0			0	1
												0.25	0.75			1	0
												1	0			0.788	0.212
												0.208	0.792			1	0
												0	1			1	0
												0.158	0.842			1	0
												1	0			1	0
												1	0			1	0
												1	0			0.806	0.195
												0	1			0	1
												0	1			1	0
												1	0			0.744	0.256
												0.7	0.3			0.849	0.151
																1	0
												1	0			0.65	0.35
												0.377	0.623			0.876	0.124
												0	1			0.554	0.446
												1	0			1	0
												0.983	0.016			0.464	0.536
												1	0			1	0
												0.979	0.021			1	0
												1	0			1	0
												0.5	0.5			0.939	0.061
												0.145	0.855			1	0
												0.689	0.311			1	0
												1	0			1	0
												1	0			1	0
												1	0			0.543	0.457
												0.959	0.042			0.246	0.754
												0.334	0.667			0	1
												1	0			0	1
												1	0			0.724	0.276
												0.611	0.389			0.37	0.63
												0.933	0.067			1	0
												1	0			0.894	0.106
												1	0			0.203	0.797
												0.925	0.075			1	0
												0.096	0.904			1	0
												1	0			0.667	0.333
												0.275	0.725			1	0
												0.07	0.93			0.187	0.813
												1	0			0.612	0.388
												0	1			1	0
												0	1			0.509	0.491
												0.757	0.243			0.286	0.714
												0.344	0.657			1	0
												0.845	0.155			1	0
												0.78	0.221			1	0
												1	0			1	0
												1	0			1	0
												1	0			1	0
												1	0			0	1
												0.295	0.705			1	0
												1	0			1	0
												0.901	0.1			1	0
												0.591	0.409			1	0
												0	1			0	1
												0.436	0.565			1	0
												1	0			1	0
												1	0			0.826	0.174
												0.64	0.36			1	0
												0.301	0.699			1	0
												0.781	0.219			1	0
												0	1			1	0
												1	0			1	0
												1	0			0	1
												1	0			0	1
												1	0			1	0
												1	0			0.585	0.415
												1	0			1	0
												1	0			1	0
												1	0			1	0
												1	0			1	0
																1	0
												0.676	0.324			1	0
												1	0			1	0
												1	0			0	1
												1	0			1	0
												1	0			0	1
												0.727	0.273			1	0
												0.284	0.716			1	0
												0.448	0.552
												0.186	0.814			0.854	0.146
												0.568	0.432			1	0
												0.582	0.419			0.118	0.881
												1	0			0.781	0.219
												0	1			1	0
												1	0			1	0
												0.581	0.418			0.674	0.326
												0.11	0.891			0.481	0.519
												0	1			0.308	0.692
												0	1			1	0
												0.727	0.273			1	0
												0.608	0.392			1	0
												0	1			0.806	0.194
												1	0			0.438	0.562
												1	0			0	1
												0	1			0	1
												0.321	0.679			0.367	0.633
												0.877	0.123			0.377	0.623
												0	1			0	1
												0.391	0.61			0.6	0.4
												0	1			1	0
																1	0
																1	0
																1	0
																0.211	0.789
																0.286	0.714
																0.416	0.584
																0	1
																0.862	0.138
																0.665	0.336
																0.6	0.4
																0.033	0.967
																1	0
																1	0
																0.818	0.182
																0.666	0.334
																0	1
																0.667	0.333
																1	0
																0.618	0.382
																0	1
																0.71	0.29
												0.279	0.721	0.46	0.541	1	0
												0.891	0.109	0.382	0.618	0.934	0.067
												0.314	0.686	1	0	1	0
												1	0	0.822	0.178	0.068	0.932
												1	0	0.946	0.054	0.864	0.136
												0.178	0.822	1	0	0.93	0.07
												0.582	0.419	0.8	0.2	1	0
												1	0	0.174	0.826	0.513	0.488
												0	1	1	0	0.928	0.072
												0.103	0.897	0.282	0.719	0	1
												0.141	0.859	0.092	0.908	1	0
												1	0	0.871	0.129	0.921	0.079
												0	1	1	0	0.479	0.52
												1	0	1	0	0	1
														0.235	0.765	0.231	0.769
												0.978	0.022	1	0	0.4	0.6
												0.939	0.061	0.872	0.128	0.429	0.571
												1	0	1	0	0.254	0.746
												1	0	1	0	1	0
												1	0	0.565	0.435	0.091	0.909
												0.914	0.086	0.973	0.027	1	0
												0.208	0.792	1	0	1	0
												0.855	0.145	0.569	0.431	1	0
												0.857	0.143	1	0	0.163	0.837
												0.551	0.449	0.688	0.312	1	0
												0.122	0.878	1	0	1	0
												1	0	1	0	0	1
												0.935	0.066	0.815	0.185	0.149	0.851
												1	0	0.666	0.333	1	0
												0.897	0.103	1	0	0	1
												1	0	0.147	0.853	0.52	0.48
												1	0	1	0
												0.7	0.3	1	0	0.947	0.053
												1	0	1	0	1	0
												0.5	0.5	0.789	0.211	0.15	0.85
												1	0	1	0	1	0
												1	0	0.318	0.682	1	0
												0.533	0.467	1	0	1	0
												0	1	0.573	0.427	1	0
												1	0	1	0	1	0
												0.663	0.336	0.595	0.405	1	0
												0.884	0.116	0.132	0.868	0.632	0.368
												1	0	0.389	0.611	0.786	0.214
												1	0	1	0	0.643	0.357
												1	0	0	1	1	0
												0.065	0.935	0	1	1	0
												1	0	0	1	1	0
												1	0			1	0
												0.178	0.822	1	0	0.814	0.186
												1	0	0.792	0.208	0.609	0.391
												0	1	0.358	0.642	0.5	0.5
												1	0	0.738	0.263	1	0
												1	0	1	0	1	0
												1	0	1	0	0.126	0.873
												1	0	0.819	0.182	1	0
												0.667	0.333	0.969	0.03	1	0
												0.666	0.333	1	0	0	1
												1	0	0	1	0.857	0.143
												0	1	0.792	0.208	1	0
												0.306	0.694	1	0	1	0
												1	0	0	1	1	0
														1	0	1	0
												0.656	0.344	1	0	1	0
												0.627	0.372	1	0	1	0
												1	0	0.345	0.655	1	0
												1	0	0.844	0.156	0.242	0.758
												0.592	0.408	0.605	0.395	1	0
												0.109	0.891	0.157	0.843	1	0
														1	0	1	0
												0.624	0.376	1	0	1	0
												0	1	1	0	0.728	0.273
												0	1	1	0	1	0
														1	0	1	0
												0.165	0.835	0.7	0.3	1	0
												0.954	0.046	0	1	1	0
												0.372	0.627	0.194	0.806	1	0
												0.715	0.286	0.795	0.205	1	0
												0.077	0.923	1	0	1	0
												0.088	0.912	0.667	0.333	0.16	0.84
												0.963	0.037	1	0	1	0
												0	1	0.441	0.559	1	0
												1	0	0.784	0.216	0.324	0.676
												0.778	0.222	1	0	0.165	0.835
												0.666	0.333	1	0	1	0
												1	0	1	0	1	0
												0.258	0.742	1	0	1	0
												0.223	0.777	0.895	0.105	0.25	0.75
														0	1	1	0
														1	0	0.457	0.543
														1	0	0.115	0.885
														0	1	1	0
														1	0	0.895	0.105
														1	0	1	0
														1	0	1	0
														1	0	0.782	0.218
														1	0	1	0
														1	0	1	0
														0.227	0.773	1	0
														0	1	0	1
														0.519	0.481	0.825	0.175
														0.312	0.688	0.903	0.097
														1	0	1	0
														0.333	0.667	0.765	0.235
														1	0	0.066	0.934
														1	0	1	0
														1	0	1	0
														1	0	0.197	0.803
														1	0	1	0
														0	1	1	0
														1	0	1	0
														1	0	0.889	0.111
														0	1	1	0
														1	0	1	0
																1	0
														1	0	1	0
														0.957	0.043	0.187	0.812
														1	0	0.864	0.136
														1	0	1	0
														1	0	1	0
														1	0	0.222	0.778
														0.833	0.167	1	0
														0.03	0.97	1	0
														0.14	0.86	1	0
														1	0	1	0
														1	0	0.541	0.459
														0.951	0.049	0.8	0.2
														0.765	0.235	0.32	0.68
														1	0	0	1
														1	0	0.134	0.866
														0.58	0.42	1	0
														0	1	0.171	0.829
														0.846	0.154	0.059	0.94
														1	0	1	0
														1	0	1	0
														1	0	1	0
														0.875	0.125	1	0
														1	0	1	0
														1	0	0.153	0.847
														1	0	0.133	0.867
														1	0	0.024	0.976
														0.879	0.121	0.345	0.655
														1	0	0.115	0.885
														0.639	0.361	1	0
														0.741	0.259	0.134	0.866
														1	0	1	0
														0.857	0.143	0.576	0.424
														0.5	0.5	1	0
														1	0	0.201	0.798
														0.449	0.551	1	0
														1	0	1	0
														0	1	0.667	0.333
														0	1	1	0
														0	1	1	0
														0.545	0.455	1	0
														0.848	0.152	1	0
														1	0	1	0
														1	0	1	0
														0.339	0.661	1	0
														0	1	0.722	0.278
														1	0	0.307	0.692
														1	0	0	1
														1	0	1	0
														1	0	0	1
														1	0	1	0
														1	0	0.762	0.238
														1	0	1	0
														0.533	0.467	1	0
														0	1	1	0
														1	0	0	1
														1	0	0	1
														1	0	1	0
														0.927	0.073	1	0
														1	0	1	0
														1	0	1	0
														0	1	0.706	0.294
														0.36	0.64	1	0
														0	1	0	1
														1	0	1	0
														1	0	1	0
														1	0	1	0
														1	0	1	0
														0.833	0.167	0	1
														1	0	1	0
														1	0	1	0
														1	0	1	0
														0.6	0.4	1	0
														1	0	1	0
														1	0	1	0
														1	0	1	0
														1	0	0.75	0.25
														0	1	0	1
														1	0	0	1
														1	0	1	0
														0	1	1	0
														0	1	1	0
														1	0	1	0
														1	0	1	0
														1	0	1	0
														1	0	0.466	0.533
														1	0	0.84	0.16
														1	0	0.221	0.78
														0.667	0.333	1	0
																0.19	0.81
														1	0	1	0
														0.577	0.423	1	0
														0	1	1	0
														0.418	0.583	0	1
														1	0	1	0
														0.959	0.041	1	0
														0.613	0.386	1	0
														0.569	0.431	0	1
														0.739	0.261	1	0
														1	0	1	0
														0.833	0.167	0	1
														1	0	1	0
														1	0	0.715	0.286
														0.83	0.17	0.741	0.259
														0.958	0.042	1	0
														0.674	0.326	1	0
														1	0	1	0
														1	0	1	0
														1	0
														1	0	1	0
														0.039	0.961	0	1
														0.28	0.719	0.217	0.783
														1	0	0.05	0.95
														1	0	0.684	0.316
														1	0	1	0
														1	0	0.937	0.063
														0.833	0.167	1	0
														0.037	0.963	1	0
														0.077	0.923	0	1
														0.4	0.6	0.09	0.91
														0.879	0.122	1	0
														0.919	0.081	1	0
														1	0	1	0
														0.747	0.253	1	0
														0.565	0.435	0.551	0.449
														1	0	0	1
														1	0	0	1
														0.256	0.744	0	1
														1	0	1	0
														1	0	1	0
														1	0
														0.546	0.455
														0.71	0.29
														1	0
														1	0
														0	1
														1	0
														0	1
														0	1
														1	0
														0.633	0.367
														1	0
														1	0
														0.636	0.364
														1	0
														0.526	0.474
														1	0
														0.836	0.164
														1	0
														1	0
														1	0
														0.925	0.075
														0.12	0.88
														1	0
														0.294	0.705
														1	0
														0.905	0.095
														0.167	0.833
														1	0
														0.584	0.417
														1	0
														1	0
														0.22	0.78
														0.49	0.511
														0.975	0.025
														0.494	0.506
														0.759	0.241
														0.96	0.04
														1	0
														1	0
														0.405	0.595
														0.054	0.946
														1	0
														1	0
														1	0
														0.75	0.25
														1	0
														0.38	0.62
														0.468	0.532
														1	0
														0.921	0.079
														0.65	0.35
														1	0
														0	1
														0.5	0.5
														1	0
														0	1
														1	0
														1	0
														1	0
														1	0
														0	1
														1	0
														1	0
														0	1
														0.65	0.35
														0	1
														0	1
														0	1
														0.519	0.481
														1	0
														0.017	0.983
														1	0
														1	0
														0.722	0.278
														1	0
														1	0
														0.727	0.273
														1	0
														0.179	0.821
														0.7	0.3
														1	0
														0.323	0.677
														0.739	0.261
														1	0
														1	0
														1	0
														1	0
														0	1
														1	0
														1	0
														0	1
														0	1
														1	0
														1	0
														0	1
														1	0
														1	0
														1	0
														0	1
														1	0
														0.153	0.847
														1	0
														1	0
														1	0
														1	0
														0	1
														1	0
														0.143	0.857
														0.421	0.579
														0.179	0.821
														1	0
														1	0
														1	0
														0	1
														1	0
														1	0
														1	0
														1	0
														1	0
														1	0
														1	0
														0.978	0.022
														0.3	0.7
														0	1
														0.316	0.683
														0.803	0.197
														1	0
														1	0
														0.322	0.678
														1	0
														1	0
														1	0
														0.954	0.046
														1	0
														1	0
														1	0
														0	1
														1	0
														0.494	0.506
														0	1
														1	0
														0.732	0.268
														0	1
														1	0
														0.45	0.55
														0.715	0.286
														1	0
														1	0
														1	0
														0.596	0.404
														1	0
														1	0
														1	0
														0.735	0.265
														0.785	0.214
														1	0
														0.889	0.111
														1	0
														1	0
														0.667	0.333
														1	0
														0	1
														1	0
														0.579	0.422
														1	0
														1	0
														0.84	0.16
														0.25	0.75
														0.718	0.282
														0.824	0.176
														0.346	0.654
														0.136	0.864
														1	0
														0.814	0.186
														1	0
														0	1
														0.975	0.025
														1	0
														0.895	0.106
														0.643	0.357
														0.877	0.122
														0	1
														0.398	0.602
														0.922	0.078
														1	0
														0	1
														0.336	0.664
														0.214	0.786
														1	0
														0.196	0.805
														0	1
														1	0
														1	0
														0.017	0.983
														0	1
														0	1
														0.552	0.448
														0	1
														0	1
														1	0
														1	0
														1	0
														0.758	0.242
														0	1
														1	0
														1	0
												1	0	0.796	0.204
												1	0	1	0
												0.722	0.278	1	0
												0.52	0.48	1	0
												1	0	0.606	0.394
												0.241	0.759	0.96	0.04
												0.533	0.467	0.939	0.061
												0.827	0.173	0.842	0.158
												1	0	0.471	0.528
												0.862	0.138	0.245	0.756
												0.688	0.312	0.076	0.924
												1	0	0.224	0.776
												1	0	0.464	0.537
												0.369	0.63	0.216	0.784
												1	0	0.267	0.732
												0.957	0.043	0.627	0.373
												1	0	0.796	0.204
												1	0	1	0
												1	0	0.79	0.211
												0.837	0.163	1	0
												0.812	0.188	1	0
												1	0	1	0
												1	0	0.08	0.919
												1	0	0.883	0.118
												1	0	0.48	0.519
												1	0	0.643	0.357
												0.704	0.296	1	0
												1	0	0.909	0.091
												0.108	0.892	1	0
												1	0	1	0
												1	0	0.741	0.259
												1	0	0.481	0.519
												0.364	0.636	1	0
												0	1	0.48	0.52
												0.643	0.357	0.777	0.222
												0.918	0.082	0.527	0.473
												0.733	0.267	0.783	0.217
												0	1	0.244	0.756
												0.711	0.289	1	0
												1	0	1	0
												0.9	0.1	1	0
												0	1	1	0
												1	0
												0.724	0.276	0.98	0.02
												0.456	0.544	1	0
												0.635	0.365	1	0
												1	0	0.86	0.14
												1	0	1	0
												0.263	0.737	0.783	0.217
												1	0	1	0
												0.343	0.657	0.465	0.535
												0.6	0.4	0.081	0.919
												0.541	0.458	1	0
												0.625	0.375	0.378	0.622
												1	0	1	0
												1	0	0.877	0.123
												1	0	0.794	0.206
												0.464	0.536	0.937	0.063
												1	0	0.287	0.714
												1	0	0.625	0.375
												0.416	0.583	0.899	0.101
												1	0	1	0
												1	0	1	0
												0.737	0.263	1	0
												0.717	0.282	1	0
												0.667	0.333	1	0
												0	1	0.635	0.366
												0	1	1	0
												1	0	1	0
												1	0	1	0
												1	0	0.788	0.212
												1	0	0.759	0.241
												1	0	0.921	0.078
												1	0	1	0
												1	0	0.917	0.083
												1	0	0.537	0.463
												1	0	0.417	0.583
														0.368	0.632
												1	0	0.947	0.053
												1	0	1	0
												0.33	0.669	1	0
												1	0	1	0
												0.826	0.174	1	0
												0.282	0.718	1	0
												0.425	0.575	1	0
												0.743	0.256	1	0
												0.492	0.508	0.473	0.527
												1	0	1	0
												1	0	0.842	0.158
												1	0	1	0
												0.657	0.343	1	0
												1	0	1	0
												0.878	0.122	0.445	0.556
												0.588	0.412	0.578	0.422
												0.818	0.182	1	0
												1	0	0.17	0.83
												0.329	0.671	0.046	0.954
												1	0	0.813	0.187
												1	0	1	0
												1	0	1	0
												1	0	1	0
												0.857	0.143	1	0
												1	0	0.773	0.227
												0.558	0.441	1	0
												1	0	0.229	0.771
												1	0	0.815	0.185
												1	0	1	0
												0.778	0.222	1	0
												1	0	0.904	0.096
												0	1	1	0
												0.185	0.815	1	0
												1	0	0.846	0.154
												1	0	1	0
												1	0	1	0
												0.333	0.667	0.728	0.273
												0.388	0.612	1	0
												1	0	0	1
												1	0	0.103	0.897
												1	0	0.833	0.167
												0.491	0.509	1	0
												1	0	0.079	0.921
												1	0	1	0
												1	0	0	1
												0.15	0.85	1	0
												1	0	1	0
												1	0	1	0
												1	0	1	0
												1	0	1	0
												0.618	0.382	0.429	0.571
												1	0	0.049	0.952
												0.812	0.188	1	0
												0	1	0.4	0.6
												0.042	0.958	0.424	0.576
												0.15	0.85	0.517	0.483
												0.302	0.698	0	1
												0.476	0.524	0.348	0.652
												0.8	0.2	0.344	0.656
												1	0	0.28	0.72
												1	0	1	0
												0.25	0.75	1	0
												1	0	1	0
												0.386	0.615	0	1
												1	0	0.412	0.588
												0.481	0.519	0	1
												0.096	0.903	1	0
												0	1	0	1
												0.616	0.385	1	0
												1	0	0	1
												0.182	0.818	1	0
												1	0	0.626	0.375
												1	0	1	0
												1	0	0	1
												1	0	0.65	0.35
												0.786	0.214	1	0
												0.667	0.333	0.188	0.812
														0.217	0.783
												0.146	0.854	0.571	0.429
												0.989	0.011	0	1
												0.743	0.257	0.413	0.587
												0.2	0.8	1	0
												0.851	0.149	1	0
												1	0	0.7	0.3
												0.875	0.125	1	0
												1	0	0	1
												1	0
												1	0	1	0
												1	0	1	0
												1	0	1	0
												1	0	1	0
												1	0	0.859	0.141
												0.847	0.154	0.872	0.128
												0.88	0.12	1	0
												0.429	0.571	0.727	0.273
												1	0	1	0
												1	0	1	0
												0.481	0.519	1	0
												0.193	0.807	1	0
												1	0	1	0
												1	0	1	0
												1	0	1	0
												0.879	0.121	1	0
												0.929	0.071	1	0
												1	0	1	0
												0.917	0.083	0.715	0.286
												0.854	0.146	0.879	0.121
												1	0	1	0
												1	0	1	0
												1	0	1	0
												0.518	0.482	0.897	0.103
												0.8	0.2	0.935	0.065
												1	0	0.934	0.066
												1	0	0.785	0.215
												1	0	1	0
												1	0	1	0
												1	0	1	0
												1	0	1	0
												0.857	0.143	0.785	0.214
												1	0	0.276	0.724
												1	0	1	0
												0.857	0.143	0.795	0.205
												1	0	1	0
												1	0	1	0
												1	0	1	0
												0.889	0.111	1	0
												0.605	0.395	1	0
												0.352	0.649	1	0
												1	0	0.256	0.744
												0.818	0.182	0.132	0.868
												0.728	0.273	1	0
												1	0	1	0
												0.818	0.182	1	0
												0.725	0.275	1	0
												0.935	0.065	1	0
												0.334	0.667	0.667	0.333
												1	0	1	0
												0.103	0.897	1	0
												1	0	1	0
												0.591	0.409	1	0
												1	0	0.183	0.817
												1	0	0.967	0.033
												1	0	1	0
												1	0	0	1
												1	0	1	0
												1	0	0.529	0.471
												0.833	0.167	1	0
												0.909	0.091	0.796	0.204
												0	1	1	0
												1	0	1	0
												1	0	0.75	0.25
												1	0	0	1
												1	0	1	0
												1	0	1	0
												1	0	1	0
												0.231	0.769	0.222	0.778
												0.217	0.783	0.65	0.35
												0	1	1	0
												1	0	0.923	0.077
												1	0	1	0
												0.808	0.192	0.556	0.444
												1	0	1	0
												1	0	1	0
												1	0	1	0
												1	0	0.105	0.895
												1	0	0	1
												1	0	1	0
												0.8	0.2	0.903	0.097
												1	0	1	0
												1	0	1	0
												1	0	0	1
												0.724	0.276	1	0
												0.455	0.545
												1	0	1	0
												1	0	0.219	0.781
												0.418	0.582	1	0
												0.667	0.333	0.259	0.741
												1	0	0.918	0.082
												0.407	0.593	0.357	0.644
												1	0	0.512	0.488
												1	0	1	0
												1	0	0.145	0.855
												1	0	0.912	0.088
												0.644	0.356	1	0
												0	1	0.635	0.364
												1	0	0.8	0.2
												1	0	0.876	0.124
												0.909	0.091	0.299	0.701
												0.222	0.778	1	0
												1	0	1	0
												1	0	0.167	0.833
												0	1	1	0
												1	0	1	0
												1	0	1	0
												1	0	0.423	0.577
												1	0	0.5	0.5
												1	0	1	0
												1	0	0.333	0.667
												0.666	0.333	0.726	0.275
												0.912	0.088	0.527	0.473
												1	0	0.091	0.909
												1	0	0.53	0.47
												0.81	0.19	1	0
												1	0	1	0
												1	0	1	0
												1	0	0	1
												1	0
												0.703	0.296	1	0
												1	0	0.109	0.891
												0.368	0.632	1	0
												1	0	0.384	0.616
												1	0	1	0
												1	0	1	0
												1	0	0.242	0.758
												1	0	0	1
												0.24	0.76	0.595	0.405
												1	0	0	1
												0.812	0.188	1	0
												1	0	1	0
												1	0
												1	0	1	0
												0.847	0.154	0.97	0.03
												1	0	0.717	0.284
												0	1	1	0
												0	1	0.983	0.017
												1	0	0.277	0.722
												0	1	0.574	0.426
												1	0	1	0
												1	0	1	0
												1	0	0.895	0.105
												1	0	1	0
												1	0	1	0
												1	0	0.062	0.938
												1	0	1	0
												1	0	0.575	0.425
												1	0	1	0
												1	0	1	0
												0.109	0.891	0	1
												1	0	1	0
												0.357	0.643	1	0
												0.444	0.556	0.923	0.077
												1	0	0.929	0.071
												0	1	1	0
												1	0	0.949	0.051
												0.423	0.577	1	0
												1	0	1	0
												1	0	1	0
												1	0	0.365	0.635
												0.194	0.806	1	0
												1	0	0.442	0.558
												1	0	1	0
												0.742	0.258	0.189	0.811
												1	0	1	0
												1	0	1	0
												1	0	1	0
												1	0	0.135	0.865
												0	1	1	0
												0.429	0.571	1	0
														0.37	0.63
												1	0	1	0
												0.958	0.042	1	0
												1	0	1	0
												1	0	1	0
												0.511	0.488	1	0
												1	0	0.036	0.964
												1	0	0.19	0.81
												1	0	0.412	0.588
												1	0	1	0
												1	0	0.243	0.757
												0.81	0.19	1	0
												1	0	0	1
												1	0	0.737	0.263
												0.381	0.619	0.128	0.872
												1	0	1	0
												0.87	0.13	0	1
												1	0	0	1
												1	0	1	0
												1	0	1	0
												0.923	0.077	0.778	0.222
												0.846	0.154	0.127	0.873
												1	0	0.333	0.667
												0.688	0.312	1	0
												1	0	1	0
												0.44	0.56	1	0
												1	0	0	1
												1	0	0.222	0.778
												1	0	0.703	0.297
												0.375	0.625	0.357	0.643
												1	0	0	1
												1	0	1	0
												1	0	1	0
												1	0	1	0
												0.55	0.45	0.188	0.811
												1	0	1	0
												1	0	1	0
												1	0	1	0
												1	0	1	0
												0.171	0.829	1	0
												1	0	0.153	0.847
												1	0	0.84	0.16
												1	0	0	1
												1	0	0.2	0.8
												0.506	0.494	1	0
												0.814	0.187	0.567	0.432
												1	0
												1	0	0.289	0.71
												0.232	0.768	0.893	0.107
												0.857	0.143	0.891	0.109
												1	0	1	0
												1	0	0.349	0.65
												1	0	1	0
												1	0	1	0
												1	0	1	0
												0.949	0.051	1	0
												1	0	1	0
												1	0	0.972	0.028
												1	0	1	0
												1	0	1	0
												0.833	0.167	0.739	0.261
												1	0	0.909	0.091
												1	0	1	0
												0.914	0.086	0.741	0.259
												1	0	0.614	0.386
												1	0	0.923	0.077
												0.391	0.609	1	0
												1	0	1	0
												1	0	0.696	0.304
												1	0	1	0
												1	0	0.547	0.453
												0.767	0.233	0.924	0.076
												1	0	0.921	0.079
												1	0	1	0
												1	0	1	0
												0.459	0.541	1	0
												0.769	0.231	0	1
												1	0	1	0
												0.429	0.571	0.533	0.467
												1	0	0.933	0.067
												1	0	1	0
												1	0	0.8	0.2
												1	0	1	0
												0.727	0.273	1	0
												1	0	1	0
												0.917	0.083	1	0
												1	0	0.841	0.16
												0.823	0.176	1	0
												0.75	0.25	1	0
												1	0	1	0
												1	0	0.8	0.2
												1	0	0.567	0.433
												1	0	1	0
												1	0	1	0
												1	0	0.467	0.533
												1	0	0.4	0.6
												0.013	0.987	1	0
												1	0	1	0
												0.583	0.417	1	0
												1	0	1	0
												1	0	0.358	0.642
												1	0	0.398	0.602
												1	0	1	0
												1	0	0.875	0.125
												1	0	1	0
												1	0	1	0
												1	0	1	0
												0	1	1	0
												0.017	0.983	1	0
												0.431	0.569	0.191	0.81
												1	0	0.811	0.189
												1	0	0.257	0.743
												1	0	0.769	0.231
												0.333	0.667	0.8	0.2
												0.04	0.96	1	0
												0.22	0.78	0	1
												1	0	1	0
												1	0	1	0
												1	0	1	0
												1	0	1	0
												1	0	0.907	0.093
												0.333	0.667	1	0
												0.562	0.438	1	0
												1	0	1	0
												1	0	1	0
												0.2	0.8	1	0
												1	0	1	0
												0.584	0.417	1	0
												1	0	1	0
												0.029	0.971	1	0
												1	0	1	0
												0	1	1	0
												0.143	0.857	0.775	0.225
												1	0	0	1
												1	0	1	0
												1	0	1	0
												1	0	0.533	0.467
												1	0	1	0
												1	0	0	1
												1	0	1	0
												1	0	1	0
												1	0	1	0
												1	0	1	0
												0.438	0.562	1	0
												1	0	0.171	0.829
												1	0	0	1
												1	0	1	0
												1	0	0	1
												1	0	1	0
												1	0	1	0
												1	0	1	0
												1	0	1	0
												1	0	1	0
												0	1	0.044	0.956
												1	0	1	0
												0.46	0.54	0.547	0.453
												1	0	1	0
												1	0	1	0
												0.692	0.308	0.32	0.68
												0	1	0.514	0.486
												0.118	0.882	1	0
												1	0	1	0
												0.75	0.25	1	0
												0	1	1	0
												0.641	0.359	1	0
												1	0	0	1
												0.632	0.368	0	1
												1	0	0.053	0.947
														1	0
												0.345	0.655	0	1
												1	0	0.318	0.682
												1	0	1	0
												1	0	1	0
												1	0
												0.891	0.109	1	0
												0.189	0.811	0.844	0.156
												1	0	0.385	0.615
												0.902	0.098	1	0
												1	0	0.807	0.193
												1	0	0.607	0.393
												0.808	0.191	0.914	0.086
												0.701	0.299	0.143	0.857
												1	0	0.961	0.039
												0.483	0.517	1	0
												0.932	0.068	0.333	0.667
												0.84	0.16	0.348	0.652
												1	0	0.782	0.218
												1	0	0.782	0.219
												0.405	0.595	0.623	0.377
												1	0	0.548	0.452
												1	0	0.588	0.412
												0.94	0.06	1	0
												0.688	0.312	1	0
												1	0	1	0
												1	0	1	0
												1	0	0.342	0.658
												0.889	0.111	1	0
												1	0	0	1
												0.524	0.476	0.791	0.208
												0.935	0.065	0.117	0.883
												0.941	0.059	1	0
												1	0	0.767	0.233
												1	0	0.697	0.304
												0.23	0.769	1	0
												1	0	0.885	0.115
												1	0	0.463	0.537
												0.606	0.394	1	0
												1	0	1	0
												1	0	1	0
												1	0	1	0
												0.194	0.806	0	1
												0.375	0.625	0.455	0.545
												1	0	0	1
												1	0
												1	0	0.47	0.53
												1	0	0.848	0.152
												0.085	0.915	0.519	0.481
												0.747	0.252	1	0
												1	0	0.316	0.684
												0.458	0.542	0.838	0.162
												1	0	1	0
												1	0	0.785	0.214
												0.097	0.903	1	0
												1	0	0.896	0.104
												1	0	1	0
												0.513	0.486	0.86	0.14
												1	0	1	0
												0.683	0.317	0.667	0.333
												0.676	0.324	1	0
												1	0	0.507	0.492
												1	0	0.945	0.056
												0.815	0.185	1	0
												0.463	0.537	1	0
												1	0	0	1
												1	0	1	0
												1	0	0.375	0.625
												0.5	0.5	0.265	0.735
												1	0	0.064	0.936
												0.467	0.533	1	0
												1	0	0.354	0.645
												1	0	1	0
												0.329	0.67	1	0
												1	0	0.156	0.844
												0.484	0.516	0.36	0.64
												0	1	0.964	0.035
												0.267	0.733	1	0
												1	0	0.179	0.82
												0.303	0.697	0.647	0.352
												1	0	1	0
												1	0	1	0
												1	0	1	0
												1	0	1	0
												1	0	0.86	0.14
												1	0	0.758	0.242
												1	0	0	1
												1	0	0.187	0.813
												0	1	1	0
												0.937	0.063	0.773	0.227
												0.333	0.667	0.244	0.755
												1	0	0.916	0.083
												0.688	0.312	0	1
												1	0	1	0
												1	0	0.812	0.187
												1	0	0	1
												0.773	0.227	0.75	0.25
												1	0	0.289	0.711
												0.116	0.884	0	1
												1	0	0	1
												0.432	0.568	1	0
												1	0	0.793	0.207
												0.37	0.63	1	0
												1	0	1	0
												0	1	1	0
												0.136	0.864	0	1
												1	0	1	0
												0	1	1	0
												0	1	0.113	0.888
												1	0	0.714	0.286
												1	0	0	1
														0.747	0.253
												1	0	0.561	0.439
												0.944	0.056	1	0
												0.197	0.803	1	0
												0.772	0.228	1	0
												1	0	1	0
												1	0	1	0
												1	0	0	1
												0.125	0.875	0	1
												1	0	0.957	0.043
												1	0	0.885	0.115
												1	0	1	0
												0.446	0.554	0	1
												1	0	1	0
												0.8	0.2	1	0
												0.808	0.192	0.681	0.319
												1	0	1	0
												1	0	1	0
												0.512	0.488	0.804	0.196
												1	0	1	0
												1	0	1	0
												0	1	1	0
												1	0	0.88	0.12
												0.22	0.78	1	0
												0.75	0.25
												0.488	0.511	0.951	0.049
												1	0	1	0
												0.097	0.903	1	0
												1	0	0.055	0.945
												0.871	0.129	0.946	0.054
												1	0	1	0
												1	0	0.756	0.244
												0	1	0.933	0.067
												1	0	1	0
												1	0	0.256	0.744
												0.618	0.382	1	0
												1	0	1	0
												1	0	0.954	0.047
												0.839	0.161	1	0
												0.68	0.32	1	0
												1	0	0.913	0.087
												0.4	0.6	1	0
												1	0	0.26	0.74
												1	0	1	0
												1	0	1	0
												1	0	0.711	0.289
												1	0	1	0
												0	1	0.045	0.955
												1	0	0.537	0.463
												0.76	0.24	0.778	0.222
												0.424	0.576	1	0
												1	0	1	0
												0.667	0.333	1	0
												0.821	0.179	1	0
												1	0	1	0
												0.536	0.463	1	0
												1	0	1	0
												1	0	1	0
												0.6	0.4	1	0
												1	0	1	0
												0.821	0.179	1	0
												0.327	0.673	1	0
												0.137	0.863	1	0
												0	1	1	0
												0	1	0.48	0.52
												0.516	0.484	1	0
												1	0	1	0
												0.711	0.289	0.85	0.15
												0.263	0.737	0.949	0.051
												0	1	0.886	0.114
												1	0	1	0
												1	0	0.77	0.23
												1	0	1	0
												1	0	1	0
												0.49	0.51	1	0
												1	0	1	0
												1	0	1	0
												1	0	1	0
												1	0	1	0
												0.579	0.421	1	0
												0.49	0.51	1	0
												0.296	0.704	1	0
												1	0	1	0
												1	0	1	0
												1	0	1	0
												0.25	0.75	1	0
												0.583	0.417	0.416	0.584
												1	0	0.86	0.14
												1	0	0.84	0.16
												1	0	1	0
												0	1	1	0
												1	0	1	0
												1	0	0.861	0.139
												0.75	0.25	1	0
												1	0	1	0
												1	0	1	0
												0.483	0.517	0.467	0.533
												1	0	0.765	0.235
												1	0	1	0
												1	0	1	0
												0	1	0.84	0.16
												1	0	0.123	0.877
												0	1	1	0
												1	0	0.938	0.062
												1	0	0.727	0.273
												1	0	1	0
												0.5	0.5	0	1
												1	0	1	0
												0.692	0.308	1	0
												1	0	1	0
												1	0	1	0
												0.889	0.111	1	0
												1	0	1	0
												1	0	1	0
												1	0	1	0
												1	0	1	0
												0.429	0.571	1	0
												0	1	1	0
												1	0	1	0
												1	0	1	0
												0.334	0.667	1	0
												0	1	1	0
												1	0	1	0
												1	0	0.05	0.95
												1	0	0	1
												1	0	1	0
												1	0	1	0
														1	0
												1	0	0.513	0.486
												0.763	0.237	1	0
												1	0	0.233	0.768
												0.947	0.053	1	0
												0.895	0.106	0.047	0.953
												0.342	0.658	1	0
												1	0	1	0
												0.547	0.452	1	0
												1	0	1	0
												0.511	0.489	1	0
												0.18	0.82	1	0
												1	0	1	0
												0.055	0.945	1	0
												0.342	0.658	1	0
												0.843	0.157	1	0
												1	0	1	0
												0.162	0.838	0.191	0.809
												1	0	1	0
												0.297	0.703	1	0
												1	0	0	1
												0.653	0.347	1	0
												1	0	1	0
												1	0	1	0
												1	0	1	0
												1	0	1	0
												1	0	1	0
												0.435	0.565	1	0
												0.685	0.316	1	0
												1	0	1	0
												1	0	1	0
												0.476	0.524	1	0
												0	1	1	0
												0.194	0.806	0.06	0.94
												1	0	0.291	0.709
												1	0
												0.414	0.586	0.474	0.526
												1	0	0.682	0.318
												0.844	0.156	1	0
												1	0	0.986	0.014
												1	0	0.501	0.498
												0.559	0.441	0.697	0.303
												0.778	0.222	1	0
												0.406	0.594	0.861	0.138
												0.096	0.904	1	0
												1	0	1	0
												1	0	1	0
												0.076	0.924	1	0
												0.5	0.5	0.483	0.517
												1	0	1	0
												0.645	0.354	0.423	0.577
												0.939	0.061	0.337	0.663
												1	0	1	0
												0.144	0.856	1	0
												0.845	0.155	1	0
												1	0	1	0
												1	0	1	0
												0.926	0.074	0.105	0.895
												1	0	0.745	0.255
												0.194	0.806	1	0
												1	0	1	0
												1	0	0.952	0.048
												1	0	1	0
												0.304	0.696	0.622	0.378
												0.6	0.4	0.861	0.139
												0.5	0.5	0.815	0.185
												1	0	1	0
												0.292	0.708	1	0
												0.214	0.786	1	0
												0.889	0.111	0.9	0.1
												0.16	0.84	1	0
												1	0	1	0
												1	0	1	0
												1	0	0	1
												1	0	1	0
												1	0	1	0
												1	0	0.858	0.143
												1	0	1	0
												0.321	0.679	1	0
												0.321	0.679
												1	0
												1	0
												1	0
												0.046	0.954
												0.634	0.367
												0	1
												1	0
												1	0
												1	0
												0.842	0.158
												0.6	0.4
												1	0
												1	0
												0.877	0.122
												1	0
												0.036	0.964
												0	1
												0.706	0.294
												1	0
												0	1
												1	0
												1	0
												1	0
												1	0
												0.83	0.17
												1	0
												1	0
												0.537	0.463
												1	0
												1	0
												0.113	0.887
												0.748	0.252
												0.71	0.29
												0	1
												0.12	0.88
												0.873	0.127
												1	0
												1	0
												0.999	0
												0.47	0.529
												0.625	0.375
												0.076	0.924
												1	0
												1	0
												1	0
												1	0
												0.98	0.02
												1	0
												0.94	0.06
												1	0
												1	0
												1	0
												0.529	0.471
												1	0
												0.5	0.5
												1	0
												0.963	0.037
												0.919	0.081
												0.866	0.134
												1	0
												0.321	0.679
												1	0
												0.4	0.6
												0.113	0.887
												0.211	0.789
												0	1
												0	1
												0.923	0.078
												0.446	0.554
												0.361	0.638
												0.378	0.622
												1	0
												1	0
												0.08	0.92
												0.276	0.724
												1	0
												1	0
												1	0
												0.425	0.575
												1	0
												0	1
												0	1
												0	1
												1	0
												1	0
												1	0
												1	0
												0.81	0.19	0.417	0.583	1	0
												1	0	1	0	0.795	0.204
												0.278	0.721	0.475	0.526	1	0
												0.366	0.633	0.87	0.13	1	0
												0.433	0.567	0.975	0.026	1	0
														0.03	0.969	1	0
												0.117	0.883	1	0	0.8	0.2
												0.364	0.636	1	0	1	0
												0.638	0.361	0	1	1	0
												1	0	0.544	0.456	1	0
												0.92	0.08	0.941	0.059	1	0
												0.42	0.58	0.143	0.857	1	0
												1	0	0.169	0.831	0.879	0.121
												0.447	0.553	0	1	0.698	0.302
												1	0	1	0	0.114	0.886
												1	0	0.08	0.92	0.62	0.379
												1	0			0.583	0.417
												1	0	0.889	0.111	0.246	0.754
												1	0	1	0	1	0
												1	0	1	0	0.589	0.411
												0.943	0.057	0.616	0.384	0.879	0.121
												1	0	0.581	0.419	0.614	0.386
												1	0	0.459	0.54	0	1
												0.652	0.348	1	0	1	0
												1	0	1	0	1	0
												1	0	0.747	0.253	0.156	0.844
												0.547	0.453	0.233	0.767	0.658	0.342
												1	0	0.847	0.153	0.946	0.054
												1	0	1	0	0.85	0.15
												0.951	0.049	0.913	0.087	1	0
												1	0	1	0	1	0
												0.586	0.414	0.906	0.094	1	0
												0.579	0.421	1	0	1	0
												1	0	1	0	0	1
[truncated: 1,266 more rows]
