# Supplementary material for: Regulation of different phases of AMPA receptor intracellular transport by 4.1N and SAP97
Source: eLife journal article supplement (doi:10.7554/elife.85609), 2023-04-06
Supplement: fig3-figsupp1-data1 [file sup Fig3- source data.xlsx]

## Sheet: Feuil1
Sup Fig 3B	Mean speed	IN, WT	IN, AA	IN, DD	OUT, WT	OUT, AA	OUT, DD		OUT/IN/PAUSE	WT IN	OUT	PAUSE	AA IN	OUT	PAUSE	DD IN	OUT	PAUSE
										0	1	0				0.429	0.571	0
		1.81857		1.68502						1	0	0				0.346	0.654	0
		1.62719		1.94617						0	1	0				0	0.944	0.056
		1.2471		1.45887						0	0.8	0.2				0.284	0	0.716
		1.41946		1.38798						0	0.538	0.462				0.57	0.314	0.116
		1.45787		1.22167						0.049	0	0.951				0.632	0.105	0.263
		1.33661		1.40704						0.06	0.141	0.799				0.359	0.308	0.333
		1.43873		0.979091						1	0	0				1	0	0
		1.59811								1	0	0				0.2	0.095	0.705
		1.51484					2.14413			0.51	0.118	0.373				1	0	0
		0.735625					2.05965			0	1	0				0.262	0.262	0.476
							1.38383			1	0	0				0.282	0.024	0.694
					1.45713		1.64921			0.753	0	0.247				0	0.372	0.628
					1.90498		2.51289			0	0.386	0.614				0.147	0.104	0.749
					1.37127		1.73122			1	0	0				1	0	0
					1.66789		1.29612			0.836	0	0.164				0	1	0
					1.04085					1	0	0				0.311	0.689	0
					1.60147					0.846	0.154	0				0.062	0.133	0.805
					0.793769					0	1	0				0	1	0
					1.70814					1	0	0				0	0.115	0.885
					1.3125					1	0	0				0	0.818	0.182
					0.883632					1	0	0				0	0	1
										0.478	0.435	0.087				0	1	0
		0.916778	1.39257	1.42378						0.444	0.556	0				1	0	0
		1.91012	2.23594	2.20004						0	1	0				0.276	0.724	0
		0.7194	2.0704	1.39173						1	0	0				0	1	0
		1.347	1.76564							0	1	0				0.289	0.711	0
		1.25162	1.74918				1.25628			0	0	1				0.727	0	0.273
			1.37389				2.4189			0	1	0				0	1	0
			1.492		1.20391		1.1795			1	0	0				0	0.903	0.097
					1.94076					0.846	0	0.154				0.071	0.31	0.619
					1.021	1.53689				0	0	1				0	1	0
					1.004	2.16185				1	0	0				0	1	0
					0.741273	2.27656				0.732	0	0.268				0	1	0
						1.67941				1	0	0				0	1	0
						1.73234				0.28	0.402	0.317				1	0	0
						2.083				0.444	0.556	0				0	1	0
						1.67833				1	0	0				0	1	0
										0	1	0				1	0	0
										0.5	0.15	0.35				0	1	0
		1.44871	1.41484							0.852	0.148	0				0.122	0.612	0.265
		1.20622	1.34103							0	0.562	0.438				0	1	0
		2.41088	1.84357							0	1	0				0.304	0	0.696
		1.93479	1.45946							0.379	0.31	0.31				0	1	0
		1.70456	0.950333							0	0.667	0.333				0	1	0
		1.98362	2.08702							0	1	0				1	0	0
		1.68481	1.6598							0.129	0.484	0.387				0.362	0.263	0.375
		1.0905	1.36657							0	1	0				0	1	0
		1.45104	1.64368							0.287	0	0.713				0	1	0
			1.67424							1	0	0				0	1	0
			1.40678		1.74877					0.263	0	0.737				0	1	0
					1.8491					0	1	0				0.265	0.529	0.206
					2.25214	1.63778				0	0.088	0.912				0.517	0.207	0.276
					2.02941	1.66137				0	0	1				1	0	0
					1.81529	2.20493				1	0	0				0	0.95	0.05
					1.9587	1.83683				0	1	0				0	1	0
					1.65532	0.955667				0.375	0.625	0				0.264	0.24	0.496
					1.28481	2.01209				0.156	0.328	0.516				0	1	0
					1.6865	2.20257				1	0	0				0	1	0
						1.53572										0	1	0
						1.59155				0.964	0.036	0				0	1	0
						1.89586				0.563	0.437	0				0.259	0.074	0.667
						1.484				0	1	0				0	1	0
										0.5	0.156	0.344				0	1	0
		1.6144	0.887111	1.32988						0.635	0	0.365				0	1	0
		1.05669	1.60514	1.20947						0.205	0.256	0.538				0.381	0	0.619
		1.57086	1.89365	1.17994						0.191	0	0.809				0.098	0.78	0.122
		1.59193	1.86444	1.62466						0	0.489	0.511				0	1	0
		1.23195	1.17144	1.53503						0	0.625	0.375				0	1	0
		0.930667	1.29575							0.449	0.382	0.169				0.099	0	0.901
		1.52415								0	1	0				0	1	0
		0.976222				0.822417	1.73397			0	0.468	0.532				0.368	0.632	0
		1.179				1.53608	1.75671			0	1	0				0	1	0
		1.5232				1.72566	1.56863			0.526	0.474	0				0	0	1
						2.01854	1.60131			1	0	0				0	1	0
					0.822667	1.22974	1.74536			0.332	0.322	0.346				0	1	0
					1.71658	1.565				0.895	0	0.105				0.106	0.426	0.468
					1.40194					0.452	0.071	0.477				0.283	0.609	0.109
					1.56639					1	0	0				0	0	1
					1.24196					0	1	0				0	0.714	0.286
					1.0587					0.34	0.66	0				0.258	0.29	0.452
					1.56182					0	1	0				0	1	0
					0.8856					0	1	0				0	1	0
					1.4383					0	0	1				0	0	1
					1.10514					0	0	1				0	1	0
										0	0.76	0.24				0.062	0.082	0.856
		1.86824	1.54925	2.01569						0.105	0.709	0.186				0	0.125	0.875
		1.41261	1.40109	1.55431						0.621	0	0.379				1	0	0
		2.00841	1.3125	2.54229						0	1	0				0	1	0
		1.87981	1.31275	2.5723						0.257	0.071	0.673				0	1	0
		2.2559	1.2614	1.66418						0.082	0.918	0				0	1	0
			1.44278	1.666						0.565	0.435	0				0.467	0	0.533
			0.9725	1.68759	2.12442					0	1	0				0.2	0.4	0.4
				1.91491	1.54848					0.647	0.353	0				0	1	0
					2.30234	1.3918				0.186	0.304	0.51				0	1	0
					1.82112	1.52375	2.61878			0	1	0
					2.43067	1.18663	1.94348			0.895	0.105	0				0	0.217	0.783
						1.3885	2.2762			0	1	0				0	1	0
						1.15097	2.42968			0.407	0.497	0.096				0.308	0	0.692
						1.1333	2.22903			0	1	0				0.935	0	0.065
						1.41612	1.31794			0	0.237	0.763				0	1	0
							1.60201			0	1	0				0	1	0
							2.16707			0	1	0				0	1	0
										0	0	1				0	1	0
		1.15187		1.54163						0	0	1				0	1	0
		1.89411		1.20072						0	1	0				0	1	0
		1.58808		1.59458						1	0	0				0.375	0.625	0
		0.57125		1.30985						0	0	1				0	1	0
				1.23863						0	1	0				0	1	0
				1.98785	1.08742					1	0	0				0.128	0.089	0.783
					1.3466					1	0	0				1	0	0
					1.54724		1.76712			0.222	0	0.778				0	1	0
					1.09186		1.12104			1	0	0				1	0	0
							1.65657			0	1	0				1	0	0
							1.53841			0.63	0.027	0.342				0.57	0	0.43
							1.71879			0.818	0.182	0				0	0.889	0.111
							2.10035			0	0	1				0.412	0.353	0.235
										0	0	1				0	1	0
										0	1	0				0	0.971	0.029
										0.446	0	0.554				0.796	0	0.204
										0	1	0				1	0	0
																0	1	0
										0	1	0				0.222	0.778	0
										0.244	0.449	0.307				0	1	0
										1	0	0				1	0	0
										1	0	0				0.85	0.039	0.11
										1	0	0				0	0.958	0.042
										0.544	0.456	0				0.391	0.543	0.065
										0.353	0.647	0				0.646	0.241	0.114
										0.382	0.471	0.147				1	0	0
										0	0.762	0.238				0.375	0.5	0.125
										0.439	0.344	0.217				0	1	0
										0.194	0.339	0.467				0	0.828	0.172
										0	1	0				0.45	0.45	0.1
										0.208	0.263	0.529				1	0	0
										0	0.204	0.796				1	0	0
										0	1	0				0	1	0
										0	1	0				0	1	0
										1	0	0				0.08	0.8	0.12
										0	0.136	0.864				0	0	1
										0	1	0				0	1	0
										0.839	0.161	0				1	0	0
										0.68	0.32	0				1	0	0
										0.69	0.31	0				0	0.947	0.053
										0.86	0.14	0				0	1	0
										0.377	0.057	0.566				1	0	0
										1	0	0				0.278	0.444	0.278
										0	1	0				0	0	1
										0	1	0				0.238	0.69	0.071
										0	1	0				0	1	0
										0	0.831	0.169				0	1	0
										0	1	0				0	1	0
										0	0.808	0.192				1	0	0
										0.455	0.545	0				0.111	0.353	0.537
										0	0.505	0.495				0.091	0.119	0.79
										0.23	0.213	0.557				1	0	0
										0.545	0.455	0				0.333	0.667	0
										0	1	0				0.375	0.625	0
										0	0	1				0.435	0.15	0.415
										0	1	0				0.275	0.239	0.486
										0	0.926	0.074				0	1	0
										0	1	0				1	0	0
										0	0	1				0	1	0
										0.038	0.108	0.854				0	1	0
										0.113	0.792	0.094				0	1	0
										0	1	0				0	1	0
										0	0.245	0.755				1	0	0
										0	0	1				1	0	0
										0	0	1				1	0	0
										0.9	0.1	0				0	1	0
										0	0.395	0.605				0	1	0
										0.231	0.769	0				0	1	0
										0	1	0				0.312	0	0.688
										0	0	1				0.276	0.552	0.172
										0	1	0				0	0.383	0.617
										0	0	1				0.824	0.176	0
										0	1	0				0	1	0
										0	0	1				0.25	0.135	0.615
										0	1	0				1	0	0
										1	0	0				1	0	0
										0	1	0				0	1	0
										1	0	0				0.85	0	0.15
										0	1	0				0	0.676	0.324
										0.24	0	0.76				1	0	0
										0	1	0				0	0	1
										1	0	0				0	1	0
										0	1	0				0	0.188	0.812
										0.667	0	0.333				0	0	1
										1	0	0				0	0	1
																0	0	1
										0.4	0.523	0.077				1	0	0
										0.599	0.341	0.059				1	0	0
										1	0	0				0	1	0
										0.43	0.159	0.411				0	1	0
										0	1	0				0.13	0.478	0.391
										0.35	0.65	0				0.118	0.059	0.824
										0	1	0				0	1	0
										0.159	0	0.841				0	1	0
										0	1	0				0	1	0
										0.73	0	0.27				0.118	0.882	0
										0.909	0.091	0				1	0	0
										0.313	0.055	0.632				1	0	0
										0.279	0.721	0				0	1	0
										1	0	0				0	0	1
										0.539	0.393	0.067				0.455	0.545	0
										0	0.545	0.455				0.556	0.056	0.389
										0	0.504	0.496				0	1	0
										0	0.153	0.847				0	1	0
										0	0.489	0.511				0	1	0
										0	0	1				1	0	0
										0	1	0				0	1	0
										0.24	0.76	0				1	0	0
										0.1	0.843	0.057				0.7	0	0.3
										0	1	0				0	0	1
										0	0.924	0.076				1	0	0
										0	1	0				0	1	0
										0	1	0				0	0.5	0.5
										0.719	0.281	0				0	0	1
										0.182	0	0.818				1	0	0
										0	1	0				0.127	0	0.873
										0	1	0				0.467	0.533	0
										0.538	0.462	0				1	0	0
										0	1	0				1	0	0
										0.4	0.6	0				0.583	0.417	0
										0.806	0.194	0				0.708	0.208	0.083
										0	1	0				0	1	0
										0	1	0				0.714	0	0.286
										0.041	0.236	0.723				0	1	0
										0	1	0				1	0	0
										0.44	0.333	0.227				0	1	0
										0.24	0.76	0				0.556	0	0.444
										1	0	0				0	1	0
										0	1	0				1	0	0
										0.208	0.792	0				1	0	0
										1	0	0				0.444	0.556	0
										1	0	0				0.5	0.5	0
										0.201	0.42	0.379				0.333	0.667	0
										0.596	0.374	0.03				0	0	1
										0	0	1				0	1	0
										0	0	1				0	1	0
										0	0	1				0.556	0	0.444
										0	0	1				0	0	1
										0.266	0.035	0.699				0	1	0
										1	0	0				0	1	0
										0	1	0				0	1	0
										0.311	0.126	0.563				1	0	0
										0	0.797	0.203				0	0	1
										0.55	0.252	0.198				0	1	0
										0	1	0
										1	0	0				0.142	0.582	0.276
										0.297	0.28	0.424				0.646	0.169	0.185
										0.118	0.137	0.745				0.738	0	0.262
										0	1	0				0.425	0.213	0.362
										0	1	0				0.429	0.169	0.403
										0.164	0.151	0.685				1	0	0
										1	0	0				0.261	0.688	0.051
										0	1	0				0.5	0.273	0.227
										0	0	1				0.673	0.327	0
										0.346	0.654	0				0.132	0.151	0.717
										0	0	1				0.171	0.724	0.105
										0	0	1				0	0.867	0.133
										0	1	0				0	1	0
										0	1	0				0	1	0
										0	1	0				0	0.905	0.095
										0.5	0.5	0				0.319	0	0.681
										0	0.5	0.5				0	1	0
										0	1	0				0.275	0.208	0.518
										0	1	0				0.074	0.211	0.715
										0	1	0				0	1	0
										0	0	1				0	0	1
										0	0.5	0.5				0.086	0.219	0.695
										0	1	0				1	0	0
																0	1	0
										0.265	0.183	0.552				0.647	0.353	0
										1	0	0				1	0	0
										0.07	0	0.93				1	0	0
										0.555	0	0.445				0	0	1
										0.155	0.103	0.742				0	1	0
										0.251	0.251	0.497				1	0	0
										0.557	0.443	0				1	0	0
										1	0	0				0	1	0
										0.214	0.078	0.708				0.267	0.373	0.36
										0.592	0	0.408				0.383	0	0.617
										0.373	0.627	0				0	1	0
										0	1	0				0.374	0	0.626
										0	1	0				0	0	1
										0.213	0.236	0.551				0.624	0	0.376
										1	0	0				0.75	0	0.25
										0	1	0				0.078	0.216	0.706
										0.4	0.6	0				1	0	0
										0	1	0				0	1	0
										0.182	0.818	0				0.436	0.03	0.535
										0.776	0.224	0				0	1	0
										0.147	0	0.853				0	0	1
										0.606	0.117	0.277				0.463	0.171	0.366
										0	1	0				0	0.279	0.721
										0	1	0				1	0	0
										0.906	0.094	0				1	0	0
										0.206	0.794	0
										0.237	0.622	0.141				0.319	0.1	0.582
										0.412	0.247	0.341				0.303	0.236	0.461
										0.543	0.062	0.395				0	1	0
										0.157	0.022	0.821				0.074	0	0.926
										1	0	0				0.933	0.067	0
										0	0.936	0.064				1	0	0
										1	0	0				0	1	0
										0.134	0.866	0				0.955	0	0.045
										0	0.495	0.505				0	1	0
										1	0	0				1	0	0
										0	0	1				0.087	0.803	0.11
										0.937	0.062	0				0.614	0.289	0.097
										0.093	0.113	0.795				0	1	0
										0	1	0				0	1	0
										0.625	0.375	0				0	0	1
										0	0	1				0	0.767	0.233
										0.231	0.769	0				0.136	0.675	0.188
										0.326	0.372	0.302				1	0	0
										1	0	0				0	1	0
										0.741	0	0.259				0	0	1
										1	0	0				1	0	0
										1	0	0				0	0.676	0.324
										0	0	1				0	0	1
										0	0	1				0	0	1
										0.833	0.167	0				0	0.965	0.035
										0	0	1				0.394	0.412	0.195
										1	0	0				0.514	0.486	0
										0.606	0.394	0				0	1	0
										0	1	0				0	1	0
										1	0	0				0.809	0	0.191
										1	0	0				0.111	0.24	0.649
										0	0	1				0	1	0
										0.188	0.219	0.594				0.152	0.172	0.676
										1	0	0				0.158	0.053	0.789
										1	0	0				0.6	0.4	0
										0	1	0				1	0	0
										0	0	1				0.137	0	0.863
										1	0	0				0	0	1
										1	0	0				0.765	0.235	0
										0.745	0.082	0.173				1	0	0
										0	0	1				0.201	0.049	0.75
										0	0.08	0.92				1	0	0
										0	1	0				0	1	0
										1	0	0				1	0	0
										0.42	0.358	0.222				0	1	0
										0.347	0.653	0				0.273	0.394	0.333
										0	1	0				0.277	0.66	0.064
										0	1	0				0	0	1
										0	1	0				0	0	1
										0	0	1				0.345	0.218	0.436
										0	1	0				1	0	0
										0.621	0.379	0				1	0	0
																1	0	0
										0.333	0.202	0.465				0	0.06	0.94
										0	1	0				0.219	0.171	0.61
										0.416	0.472	0.112				0.436	0.564	0
										0.714	0	0.286				0.1	0.193	0.707
										0.163	0	0.837				0	0	1
										0	0	1				0.306	0.347	0.347
										0.26	0.277	0.462				0.146	0.061	0.793
										0.086	0.422	0.491				0	0	1
										0.279	0.721	0				1	0	0
										0	1	0				1	0	0
										0.245	0.211	0.544				0	1	0
										0.209	0.225	0.566				0.98	0	0.02
										0.372	0.453	0.175				1	0	0
										0	1	0				0.792	0.208	0
										0	1	0				1	0	0
										1	0	0				0.128	0.128	0.745
										0.356	0.367	0.278				0	1	0
										0.342	0.158	0.5				0.067	0.222	0.711
										0	1	0				0.19	0.643	0.167
										0.941	0	0.059				0.19	0.643	0.167
										0.214	0.786	0				0.19	0.643	0.167
										1	0	0				1	0	0
										0	0	1				0	0	1
										0.212	0.053	0.735				0	1	0
										0.8	0	0.2				0	0	1
										0	1	0				0	0	1
										0	0	1				0.364	0.424	0.212
										0	1	0				0	0	1
										0	0	1				0.5	0	0.5
										0.034	0.212	0.753				1	0	0
										0	1	0				0	1	0
										0	0	1				1	0	0
										0.189	0.179	0.632				0	1	0
										0.518	0	0.482				0.409	0.591	0
										0.387	0	0.613				0	0	1
										0	0.593	0.407				0	1	0
										0	0	1				0	1	0
										0	0.175	0.825				0	1	0
										0.38	0.62	0				0	1	0
										0.5	0.5	0				0	1	0
										1	0	0				0	1	0
										0	0	1				0	1	0
										0	1	0				0	1	0
										0	1	0				0	0	1
										0.5	0.5	0				0.455	0.545	0
										0.314	0.686	0				1	0	0
										0	1	0				1	0	0
										0.45	0.55	0				1	0	0
																0	1	0
										0.462	0.538	0				1	0	0
										1	0	0				0.308	0.423	0.269
										1	0	0				0	0	1
										0.394	0.155	0.451				0	1	0
										0.098	0.902	0				1	0	0
										1	0	0
										0.346	0.529	0.125				1	0	0
										0.184	0.676	0.14				0.133	0	0.867
										1	0	0				0.456	0.544	0
										1	0	0				0	1	0
										0.237	0.763	0				0	1	0
										0	1	0				0	1	0
										0.419	0	0.581				0	1	0
										0	1	0				0	1	0
										0.618	0.382	0				0	1	0
										0	1	0				0	0	1
										0.412	0.471	0.118				0	1	0
										0	0	1				0	1	0
										0	1	0				0	0	1
										0.122	0.22	0.659				0	0	1
										0.304	0.456	0.241				0.078	0.922	0
										0.4	0.53	0.07				1	0	0
										1	0	0				0.296	0.155	0.549
										0	0.971	0.029				0	1	0
										0.088	0.228	0.684				0.355	0.121	0.524
										0	1	0				0	1	0
										0.098	0.543	0.36				1	0	0
										1	0	0				0.105	0.895	0
										0	0.814	0.186				0.317	0.683	0
										1	0	0				1	0	0
										0	1	0				0.535	0.326	0.14
										0	1	0				0	0	1
										0.253	0.321	0.425				1	0	0
										0	1	0				1	0	0
										0	1	0				0.116	0.06	0.824
										0	1	0				0	1	0
										0	1	0				0	0	1
										0.919	0	0.081				0.262	0.066	0.672
										0	1	0				0	1	0
										0.634	0	0.366				1	0	0
										0	1	0				0.5	0.5	0
										0.509	0.019	0.472				0.258	0.386	0.356
										0.462	0.538	0				0.069	0.02	0.911
										0.157	0.702	0.14				0.231	0.649	0.12
										1	0	0				0	1	0
										0.353	0.529	0.118				0.118	0.426	0.456
										0	1	0				0	1	0
										0.769	0	0.231				0	1	0
										1	0	0				0	1	0
										1	0	0				0	1	0
										0	1	0				0	1	0
										0	1	0				0.286	0.714	0
										0	1	0				1	0	0
										0.229	0.771	0				1	0	0
										0	1	0				0.532	0.153	0.315
										0.138	0.69	0.172				1	0	0
										0	1	0				1	0	0
										0.118	0.882	0				0	1	0
										0	1	0				1	0	0
										0	0.62	0.38				0	1	0
										0	0.917	0.083				1	0	0
										0.622	0.244	0.133				1	0	0
										0	0	1				0.165	0.585	0.25
										0	1	0				0.079	0.403	0.518
										0.189	0.236	0.575				0	1	0
										0	1	0				0.171	0.395	0.434
										0.667	0.208	0.125				0	0	1
										0.75	0.088	0.163				0	0.881	0.119
										1	0	0				1	0	0
										0	0	1				0	1	0
										0	1	0				0.487	0.195	0.319
										0	0	1				0	1	0
										0	1	0				0.287	0.049	0.665
										1	0	0				0	1	0
										0.583	0.417	0				0	1	0
										1	0	0				0	1	0
										0	1	0				0	1	0
										1	0	0				1	0	0
										0	0.714	0.286				0.306	0.694	0
										0	1	0				0.056	0.136	0.808
										0	1	0				0	0.862	0.138
										0	1	0				0	0	1
										0.25	0	0.75				0.233	0.767	0
										1	0	0				0.094	0.694	0.212
										0	0.208	0.792				0.658	0.342	0
										0	0	1				0	1	0
										0	0.158	0.842				1	0	0
										0.271	0.729	0				1	0	0
										1	0	0				0	1	0
										1	0	0				0.416	0.39	0.195
										0	0	1				0	0	1
										0	0	1				0	1	0
										0	1	0				0	0.744	0.256
										0.7	0	0.3				0.14	0.709	0.151
																0	1	0
										1	0	0				0.425	0.225	0.35
										0	0.377	0.623				0.508	0.368	0.124
										0	0	1				0.188	0.366	0.446
										0.634	0.366	0				0	1	0
										0.478	0.505	0.016				0.08	0.384	0.536
										0.4	0.6	0				1	0	0
										0.448	0.531	0.021				0	1	0
										0.674	0.326	0				0	1	0
										0.404	0.096	0.5				0.321	0.618	0.061
										0	0.145	0.855				0.19	0.81	0
										0.135	0.554	0.311				0.419	0.581	0
										0.559	0.441	0				0.625	0.375	0
										0	1	0				1	0	0
										0	1	0				0	0.543	0.457
										0.667	0.292	0.042				0.222	0.024	0.754
										0.325	0.009	0.667				0	0	1
										0	1	0				0	0	1
										0	1	0				0.476	0.248	0.276
										0	0.611	0.389				0.16	0.21	0.63
										0.315	0.618	0.067				0	1	0
										0.488	0.512	0				0.176	0.718	0.106
										1	0	0				0	0.203	0.797
										0	0.925	0.075				1	0	0
										0.081	0.015	0.904				0.263	0.737	0
										1	0	0				0.367	0.3	0.333
										0.148	0.127	0.725				0	1	0
										0.07	0	0.93				0.107	0.08	0.813
										0.641	0.359	0				0	0.612	0.388
										0	0	1				1	0	0
										0	0	1				0.193	0.316	0.491
										0.757	0	0.243				0	0.286	0.714
										0.254	0.09	0.657				1	0	0
										0.309	0.536	0.155				0	1	0
										0.662	0.118	0.221				0	1	0
										0.407	0.593	0				1	0	0
										0	1	0				1	0	0
										1	0	0				0.218	0.782	0
										1	0	0				0	0	1
										0	0.295	0.705				0.636	0.364	0
										0.674	0.326	0				1	0	0
										0.299	0.602	0.1				1	0	0
										0	0.591	0.409				1	0	0
										0	0	1				0	0	1
										0.202	0.234	0.565				0.667	0.333	0
										0.278	0.722	0				1	0	0
										1	0	0				0.826	0	0.174
										0.26	0.38	0.36				0	1	0
										0.082	0.219	0.699				1	0	0
										0.531	0.25	0.219				0	1	0
										0	0	1				0	1	0
										0	1	0				0	1	0
										1	0	0				0	0	1
										1	0	0				0	0	1
										0	1	0				0	1	0
										0	1	0				0.585	0	0.415
										0.727	0.273	0				0	1	0
										0	1	0				0	1	0
										0.267	0.733	0				1	0	0
										0	1	0				0	1	0
																1	0	0
										0.162	0.514	0.324				1	0	0
										0	1	0				1	0	0
										0	1	0				0	0	1
										0	1	0				1	0	0
										0	1	0				0	0	1
										0.727	0	0.273				0	1	0
										0	0.284	0.716				0	1	0
										0.276	0.172	0.552
										0.013	0.173	0.814				0.169	0.685	0.146
										0.568	0	0.432				0.926	0.074	0
										0.467	0.115	0.419				0.04	0.078	0.881
										0.353	0.647	0				0	0.781	0.219
										0	0	1				0	1	0
										1	0	0				0	1	0
										0.362	0.219	0.418				0.213	0.461	0.326
										0.055	0.055	0.891				0	0.481	0.519
										0	0	1				0.124	0.184	0.692
										0	0	1				0	1	0
										0.527	0.2	0.273				0	1	0
										0.378	0.23	0.392				1	0	0
										0	0	1				0.187	0.619	0.194
										0.222	0.778	0				0.266	0.172	0.562
										0.522	0.478	0				0	0	1
										0	0	1				0	0	1
										0	0.321	0.679				0	0.367	0.633
										0.308	0.569	0.123				0	0.377	0.623
										0	0	1				0	0	1
										0.22	0.171	0.61				0	0.6	0.4
										0	0	1				0.641	0.359	0
																0.463	0.537	0
																0	1	0
																0	1	0
																0.102	0.109	0.789
																0.217	0.069	0.714
																0	0.416	0.584
																0	0	1
																0.604	0.258	0.138
																0.187	0.478	0.336
																0	0.6	0.4
																0.017	0.016	0.967
																0	1	0
																0.763	0.237	0
																0.466	0.352	0.182
																0.376	0.29	0.334
																0	0	1
																0.474	0.193	0.333
																0.312	0.688	0
																0.618	0	0.382
																0	0	1
																0.065	0.645	0.29
										0.154	0.125	0.721	0.034	0.426	0.541	1	0	0
										0.508	0.383	0.109	0.042	0.34	0.618	0.187	0.747	0.067
										0.162	0.152	0.686	0	1	0	1	0	0
										0.417	0.583	0	0.822	0	0.178	0.068	0	0.932
										0.068	0.932	0	0.176	0.77	0.054	0.864	0	0.136
										0.123	0.055	0.822	1	0	0	0	0.93	0.07
										0.233	0.349	0.419	0.484	0.316	0.2	1	0	0
										0	1	0	0	0.174	0.826	0.113	0.4	0.488
										0	0	1	0	1	0	0.253	0.675	0.072
										0.103	0	0.897	0.042	0.24	0.719	0	0	1
										0.112	0.029	0.859	0	0.092	0.908	0	1	0
										0	1	0	0	0.871	0.129	0	0.921	0.079
										0	0	1	1	0	0	0.418	0.061	0.52
										0	1	0	0	1	0	0	0	1
													0.235	0	0.765	0.096	0.135	0.769
										0.413	0.565	0.022	0.114	0.886	0	0	0.4	0.6
										0	0.939	0.061	0.872	0	0.128	0.013	0.416	0.571
										0.5	0.5	0	1	0	0	0.107	0.147	0.746
										0	1	0	1	0	0	1	0	0
										0	1	0	0.179	0.386	0.435	0.091	0	0.909
										0	0.914	0.086	0.158	0.815	0.027	0	1	0
										0.192	0.016	0.792	1	0	0	1	0	0
										0	0.855	0.145	0	0.569	0.431	0	1	0
										0.381	0.476	0.143	0	1	0	0	0.163	0.837
										0.205	0.346	0.449	0.308	0.38	0.312	0	1	0
										0	0.122	0.878	1	0	0	0.444	0.556	0
										0	1	0	1	0	0	0	0	1
										0.869	0.066	0.066	0.63	0.185	0.185	0.087	0.062	0.851
										0	1	0	0.333	0.333	0.333	1	0	0
										0.897	0	0.103	1	0	0	0	0	1
										1	0	0	0.147	0	0.853	0	0.52	0.48
										0	1	0	0	1	0
										0.433	0.267	0.3	1	0	0	0.368	0.579	0.053
										1	0	0	0	1	0	0	1	0
										0.35	0.15	0.5	0	0.789	0.211	0	0.15	0.85
										1	0	0	0	1	0	0	1	0
										0	1	0	0.318	0	0.682	0	1	0
										0	0.533	0.467	0	1	0	1	0	0
										0	0	1	0.549	0.024	0.427	1	0	0
										0	1	0	1	0	0	0	1	0
										0.336	0.327	0.336	0.381	0.214	0.405	1	0	0
										0.884	0	0.116	0.053	0.079	0.868	0.474	0.158	0.368
										0.429	0.571	0	0.389	0	0.611	0.786	0	0.214
										0.5	0.5	0	0	1	0	0	0.643	0.357
										0	1	0	0	0	1	0	1	0
										0.037	0.028	0.935	0	0	1	1	0	0
										1	0	0	0	0	1	0	1	0
										0.522	0.478	0				1	0	0
										0	0.178	0.822	0.232	0.768	0	0.651	0.163	0.186
										1	0	0	0.625	0.167	0.208	0	0.609	0.391
										0	0	1	0.212	0.146	0.642	0	0.5	0.5
										0	1	0	0.588	0.15	0.263	1	0	0
										0.118	0.882	0	1	0	0	0	1	0
										0	1	0	1	0	0	0.063	0.063	0.873
										0.296	0.704	0	0.455	0.364	0.182	0	1	0
										0	0.667	0.333	0.833	0.136	0.03	0	1	0
										0.452	0.214	0.333	0	1	0	0	0	1
										1	0	0	0	0	1	0	0.857	0.143
										0	0	1	0.417	0.375	0.208	1	0	0
										0.102	0.204	0.694	0.5	0.5	0	0.853	0.147	0
										1	0	0	0	0	1	0	1	0
													0	1	0	0	1	0
										0.455	0.201	0.344	0.625	0.375	0	0	1	0
										0.614	0.013	0.372	0	1	0	0	1	0
										1	0	0	0.122	0.223	0.655	1	0	0
										0	1	0	0.311	0.533	0.156	0	0.242	0.758
										0.465	0.127	0.408	0.186	0.419	0.395	0	1	0
										0.027	0.082	0.891	0.157	0	0.843	0	1	0
													0	1	0	1	0	0
										0.363	0.261	0.376	0	1	0	0	1	0
										0	0	1	0.45	0.55	0	0.455	0.273	0.273
										0	0	1	0	1	0	1	0	0
													0	1	0	0	1	0
										0.012	0.153	0.835	0.7	0	0.3	1	0	0
										0.092	0.862	0.046	0	0	1	0	1	0
										0.176	0.196	0.627	0	0.194	0.806	0.5	0.5	0
										0.247	0.468	0.286	0.526	0.269	0.205	0	1	0
										0	0.077	0.923	1	0	0	0	1	0
										0	0.088	0.912	0.385	0.282	0.333	0	0.16	0.84
										0.648	0.315	0.037	1	0	0	1	0	0
										0	0	1	0.441	0	0.559	1	0	0
										1	0	0	0	0.784	0.216	0.206	0.118	0.676
										0.778	0	0.222	0	1	0	0.165	0	0.835
										0.133	0.533	0.333	0	1	0	0.412	0.588	0
										0	1	0	1	0	0	0	1	0
										0	0.258	0.742	0	1	0	0	1	0
										0	0.223	0.777	0	0.895	0.105	0	0.25	0.75
													0	0	1	1	0	0
													1	0	0	0	0.457	0.543
													0	1	0	0	0.115	0.885
													0	0	1	0	1	0
													0	1	0	0.895	0	0.105
													1	0	0	1	0	0
													1	0	0	1	0	0
													0	1	0	0.051	0.731	0.218
													1	0	0	1	0	0
													0	1	0	0	1	0
													0.227	0	0.773	0	1	0
													0	0	1	0	0	1
													0	0.519	0.481	0.518	0.307	0.175
													0	0.312	0.688	0.462	0.441	0.097
													0	1	0	0	1	0
													0.333	0	0.667	0.059	0.706	0.235
													1	0	0	0	0.066	0.934
													0	1	0	0	1	0
													0	1	0	1	0	0
													0	1	0	0	0.197	0.803
													0.333	0.667	0	1	0	0
													0	0	1	0	1	0
													1	0	0	1	0	0
													0	1	0	0	0.889	0.111
													0	0	1	1	0	0
													0.222	0.778	0	0	1	0
																0	1	0
													1	0	0	1	0	0
													0.489	0.468	0.043	0.156	0.031	0.812
													0.58	0.42	0	0	0.864	0.136
													0	1	0	0	1	0
													0.778	0.222	0	1	0	0
													0.5	0.5	0	0	0.222	0.778
													0	0.833	0.167	1	0	0
													0.03	0	0.97	0	1	0
													0.047	0.093	0.86	0	1	0
													0	1	0	1	0	0
													1	0	0	0.377	0.164	0.459
													0.426	0.525	0.049	0.333	0.467	0.2
													0.765	0	0.235	0.32	0	0.68
													1	0	0	0	0	1
													0	1	0	0.134	0	0.866
													0.328	0.252	0.42	0	1	0
													0	0	1	0	0.171	0.829
													0.846	0	0.154	0.018	0.041	0.94
													0	1	0	0	1	0
													0	1	0	0	1	0
													1	0	0	0	1	0
													0.818	0.057	0.125	1	0	0
													1	0	0	0	1	0
													0.308	0.692	0	0	0.153	0.847
													0	1	0	0.133	0	0.867
													0	1	0	0.024	0	0.976
													0.569	0.31	0.121	0.345	0	0.655
													0	1	0	0.115	0	0.885
													0.361	0.278	0.361	1	0	0
													0.074	0.667	0.259	0.103	0.031	0.866
													1	0	0	0.348	0.652	0
													0.857	0	0.143	0.303	0.273	0.424
													0.5	0	0.5	0.263	0.737	0
													0	1	0	0.151	0.05	0.798
													0.154	0.295	0.551	0	1	0
													1	0	0	0.538	0.462	0
													0	0	1	0	0.667	0.333
													0	0	1	0.6	0.4	0
													0	0	1	0.667	0.333	0
													0.545	0	0.455	0	1	0
													0	0.848	0.152	0	1	0
													0.1	0.9	0	1	0	0
													0	1	0	0	1	0
													0.339	0	0.661	0	1	0
													0	0	1	0.611	0.111	0.278
													0	1	0	0.115	0.192	0.692
													0	1	0	0	0	1
													1	0	0	1	0	0
													0	1	0	0	0	1
													0	1	0	0	1	0
													0.85	0.15	0	0	0.762	0.238
													1	0	0	0	1	0
													0.333	0.2	0.467	1	0	0
													0	0	1	0	1	0
													0	1	0	0	0	1
													1	0	0	0	0	1
													1	0	0	0	1	0
													0.707	0.22	0.073	0	1	0
													0.375	0.625	0	1	0	0
													0.448	0.552	0	0	1	0
													0	0	1	0.471	0.235	0.294
													0.36	0	0.64	0	1	0
													0	0	1	0	0	1
													1	0	0	1	0	0
													1	0	0	0	1	0
													1	0	0	0	1	0
													0	1	0	0	1	0
													0.352	0.481	0.167	0	0	1
													0.84	0.16	0	0	1	0
													0	1	0	0	1	0
													1	0	0	1	0	0
													0.371	0.229	0.4	1	0	0
													0	1	0	0	1	0
													0	1	0	0.538	0.462	0
													0	1	0	0.2	0.8	0
													0	1	0	0.75	0	0.25
													0	0	1	0	0	1
													1	0	0	0	0	1
													1	0	0	1	0	0
													0	0	1	0	1	0
													0	0	1	1	0	0
													0	1	0	0	1	0
													0	1	0	0	1	0
													0	1	0	0	1	0
													1	0	0	0.333	0.133	0.533
													1	0	0	0.84	0	0.16
													0.636	0.364	0	0.068	0.153	0.78
													0	0.667	0.333	0	1	0
																0	0.19	0.81
													0	1	0	1	0	0
													0.144	0.433	0.423	0	1	0
													0	0	1	1	0	0
													0.171	0.247	0.583	0	0	1
													0	1	0	0	1	0
													0	0.959	0.041	0	1	0
													0.423	0.19	0.386	0	1	0
													0.345	0.224	0.431	0	0	1
													0	0.739	0.261	0	1	0
													0.733	0.267	0	0	1	0
													0.25	0.583	0.167	0	0	1
													0.783	0.217	0	0	1	0
													0.923	0.077	0	0.429	0.286	0.286
													0.128	0.702	0.17	0	0.741	0.259
													0.324	0.634	0.042	1	0	0
													0	0.674	0.326	0	1	0
													0	1	0	0.667	0.333	0
													0	1	0	0	1	0
													0	1	0
													0	1	0	1	0	0
													0.039	0	0.961	0	0	1
													0.066	0.214	0.719	0.162	0.055	0.783
													1	0	0	0	0.05	0.95
													1	0	0	0.154	0.53	0.316
													1	0	0	1	0	0
													0	1	0	0.143	0.794	0.063
													0	0.833	0.167	0	1	0
													0.022	0.015	0.963	0	1	0
													0	0.077	0.923	0	0	1
													0.12	0.28	0.6	0.09	0	0.91
													0.557	0.322	0.122	0.574	0.426	0
													0.27	0.649	0.081	0	1	0
													0	1	0	1	0	0
													0	0.747	0.253	1	0	0
													0.565	0	0.435	0.474	0.077	0.449
													0	1	0	0	0	1
													1	0	0	0	0	1
													0	0.256	0.744	0	0	1
													0	1	0	1	0	0
													0.195	0.805	0	0	1	0
													1	0	0
													0.273	0.273	0.455
													0.129	0.581	0.29
													1	0	0
													0	1	0
													0	0	1
													0	1	0
													0	0	1
													0	0	1
													0	1	0
													0	0.633	0.367
													0	1	0
													1	0	0
													0	0.636	0.364
													1	0	0
													0	0.526	0.474
													0	1	0
													0.284	0.552	0.164
													0	1	0
													0	1	0
													0	1	0
													0.925	0	0.075
													0.018	0.102	0.88
													0	1	0
													0.071	0.223	0.705
													0.088	0.912	0
													0	0.905	0.095
													0.11	0.057	0.833
													1	0	0
													0.106	0.478	0.417
													0	1	0
													0	1	0
													0	0.22	0.78
													0.064	0.426	0.511
													0	0.975	0.025
													0.42	0.074	0.506
													0.222	0.537	0.241
													0.96	0	0.04
													0	1	0
													0	1	0
													0.367	0.038	0.595
													0	0.054	0.946
													1	0	0
													1	0	0
													1	0	0
													0	0.75	0.25
													0.894	0.106	0
													0.028	0.352	0.62
													0.355	0.113	0.532
													0	1	0
													0	0.921	0.079
													0	0.65	0.35
													1	0	0
													0	0	1
													0	0.5	0.5
													0	1	0
													0	0	1
													1	0	0
													0.263	0.737	0
													0	1	0
													1	0	0
													0	0	1
													1	0	0
													1	0	0
													0	0	1
													0.186	0.464	0.35
													0	0	1
													0	0	1
													0	0	1
													0.08	0.439	0.481
													1	0	0
													0.017	0	0.983
													0	1	0
													0	1	0
													0.278	0.444	0.278
													0	1	0
													0	1	0
													0	0.727	0.273
													0.429	0.571	0
													0	0.179	0.821
													0	0.7	0.3
													0	1	0
													0	0.323	0.677
													0.304	0.435	0.261
													0	1	0
													0.158	0.842	0
													0	1	0
													1	0	0
													0	0	1
													0	1	0
													1	0	0
													0	0	1
													0	0	1
													1	0	0
													0	1	0
													0	0	1
													1	0	0
													0	1	0
													1	0	0
													0	0	1
													0	1	0
													0	0.153	0.847
													0	1	0
													0	1	0
													1	0	0
													1	0	0
													0	0	1
													1	0	0
													0	0.143	0.857
													0	0.421	0.579
													0.179	0	0.821
													1	0	0
													0	1	0
													0	1	0
													0	0	1
													0	1	0
													1	0	0
													0	1	0
													1	0	0
													0	1	0
													0	1	0
													0	1	0
													0.328	0.65	0.022
													0	0.3	0.7
													0	0	1
													0.065	0.251	0.683
													0	0.803	0.197
													0	1	0
													0	1	0
													0.133	0.189	0.678
													0	1	0
													0	1	0
													1	0	0
													0	0.954	0.046
													0	1	0
													1	0	0
													0	1	0
													0	0	1
													0.091	0.909	0
													0.301	0.193	0.506
													0	0	1
													1	0	0
													0.732	0	0.268
													0	0	1
													0.867	0.133	0
													0	0.45	0.55
													0.286	0.429	0.286
													0	1	0
													0	1	0
													0	1	0
													0.596	0	0.404
													0	1	0
													1	0	0
													0	1	0
													0.529	0.206	0.265
													0.214	0.571	0.214
													0	1	0
													0.2	0.689	0.111
													0	1	0
													1	0	0
													0.2	0.467	0.333
													0	1	0
													0	0	1
													0	1	0
													0.265	0.314	0.422
													1	0	0
													1	0	0
													0.84	0	0.16
													0.146	0.104	0.75
													0.308	0.41	0.282
													0.054	0.77	0.176
													0.096	0.25	0.654
													0.136	0	0.864
													1	0	0
													0.124	0.69	0.186
													0	1	0
													0	0	1
													0	0.975	0.025
													0	1	0
													0.306	0.589	0.106
													0.286	0.357	0.357
													0.469	0.408	0.122
													0	0	1
													0.22	0.178	0.602
													0.57	0.352	0.078
													1	0	0
													0	0	1
													0.209	0.127	0.664
													0	0.214	0.786
													0	1	0
													0.098	0.098	0.805
													0	0	1
													0	1	0
													0.533	0.467	0
													0.017	0	0.983
													0	0	1
													0	0	1
													0.276	0.276	0.448
													0	0	1
													0	0	1
													0	1	0
													0	1	0
													0.513	0.487	0
													0.182	0.576	0.242
													0	0	1
													1	0	0
													0	1	0
										1	0	0	0.796	0	0.204
										0	1	0	0.5	0.5	0
										0	0.722	0.278	0	1	0
										0.084	0.436	0.48	1	0	0
										0	1	0	0.606	0	0.394
										0.191	0.05	0.759	0.96	0	0.04
										0	0.533	0.467	0	0.939	0.061
										0.827	0	0.173	0.658	0.184	0.158
										0.629	0.371	0	0.168	0.303	0.528
										0	0.862	0.138	0.017	0.228	0.756
										0.243	0.445	0.312	0	0.076	0.924
										0	1	0	0.11	0.114	0.776
										0.444	0.556	0	0.081	0.383	0.537
										0.152	0.217	0.63	0.169	0.047	0.784
										1	0	0	0.119	0.148	0.732
										0.957	0	0.043	0.016	0.611	0.373
										0	1	0	0.796	0	0.204
										1	0	0	0.421	0.579	0
										1	0	0	0.579	0.211	0.211
										0	0.837	0.163	0	1	0
										0	0.812	0.188	0.5	0.5	0
										0	1	0	0	1	0
										1	0	0	0.04	0.04	0.919
										1	0	0	0.412	0.471	0.118
										0	1	0	0.365	0.115	0.519
										0	1	0	0.524	0.119	0.357
										0	0.704	0.296	0.692	0.308	0
										1	0	0	0.182	0.727	0.091
										0.108	0	0.892	0	1	0
										1	0	0	0	1	0
										0	1	0	0.293	0.448	0.259
										1	0	0	0	0.481	0.519
										0.364	0	0.636	0	1	0
										0	0	1	0.48	0	0.52
										0.286	0.357	0.357	0.444	0.333	0.222
										0.137	0.781	0.082	0.527	0	0.473
										0	0.733	0.267	0.783	0	0.217
										0	0	1	0.158	0.086	0.756
										0.395	0.316	0.289	1	0	0
										0	1	0	0	1	0
										0	0.9	0.1	0	1	0
										0	0	1	1	0	0
										0.304	0.696	0
										0.724	0	0.276	0.98	0	0.02
										0.324	0.132	0.544	0	1	0
										0.154	0.481	0.365	0	1	0
										0	1	0	0.86	0	0.14
										0	1	0	0.522	0.478	0
										0.084	0.179	0.737	0.783	0	0.217
										0	1	0	0.389	0.611	0
										0	0.343	0.657	0	0.465	0.535
										0.6	0	0.4	0	0.081	0.919
										0.083	0.458	0.458	0.176	0.824	0
										0	0.625	0.375	0.11	0.268	0.622
										0	1	0	0	1	0
										0	1	0	0.49	0.387	0.123
										0.75	0.25	0	0	0.794	0.206
										0	0.464	0.536	0	0.937	0.063
										1	0	0	0.146	0.141	0.714
										0	1	0	0.139	0.486	0.375
										0.208	0.208	0.583	0	0.899	0.101
										0	1	0	0	1	0
										1	0	0	0	1	0
										0	0.737	0.263	0	1	0
										0.538	0.179	0.282	1	0	0
										0.524	0.143	0.333	1	0	0
										0	0	1	0.396	0.239	0.366
										0	0	1	0	1	0
										1	0	0	0	1	0
										1	0	0	1	0	0
										0	1	0	0.788	0	0.212
										0	1	0	0.676	0.083	0.241
										0.733	0.267	0	0.431	0.49	0.078
										0	1	0	0	1	0
										0	1	0	0	0.917	0.083
										0	1	0	0.313	0.224	0.463
										0	1	0	0.143	0.274	0.583
													0.22	0.148	0.632
										0	1	0	0	0.947	0.053
										0.167	0.833	0	0.216	0.784	0
										0.099	0.231	0.669	1	0	0
										0	1	0	0	1	0
										0	0.826	0.174	0	1	0
										0.042	0.24	0.718	1	0	0
										0.181	0.244	0.575	0.5	0.5	0
										0.189	0.554	0.256	0	1	0
										0.367	0.125	0.508	0.318	0.155	0.527
										1	0	0	1	0	0
										0.211	0.789	0	0.789	0.053	0.158
										0	1	0	0	1	0
										0.199	0.458	0.343	0.171	0.829	0
										0	1	0	0	1	0
										0	0.878	0.122	0.204	0.241	0.556
										0.078	0.51	0.412	0.125	0.453	0.422
										0	0.818	0.182	0	1	0
										0	1	0	0.17	0	0.83
										0.096	0.233	0.671	0.046	0	0.954
										1	0	0	0.16	0.653	0.187
										0	1	0	1	0	0
										0	1	0	0.261	0.739	0
										0	1	0	1	0	0
										0.464	0.393	0.143	1	0	0
										0.163	0.837	0	0.2	0.573	0.227
										0.387	0.171	0.441	0	1	0
										0	1	0	0.229	0	0.771
										0	1	0	0.296	0.519	0.185
										0	1	0	0	1	0
										0	0.778	0.222	0	1	0
										0.947	0.053	0	0.808	0.096	0.096
										0	0	1	1	0	0
										0.185	0	0.815	0	1	0
										1	0	0	0.615	0.231	0.154
										0.079	0.921	0	0.762	0.238	0
										1	0	0	0.583	0.417	0
										0.259	0.074	0.667	0.455	0.273	0.273
										0.388	0	0.612	1	0	0
										0	1	0	0	0	1
										0	1	0	0	0.103	0.897
										0	1	0	0.771	0.062	0.167
										0.491	0	0.509	1	0	0
										1	0	0	0.079	0	0.921
										0	1	0	0.625	0.375	0
										0	1	0	0	0	1
										0.15	0	0.85	0	1	0
										0	1	0	1	0	0
										0	1	0	0	1	0
										0	1	0	0	1	0
										0	1	0	1	0	0
										0	0.618	0.382	0.286	0.143	0.571
										0	1	0	0.021	0.028	0.952
										0	0.812	0.188	1	0	0
										0	0	1	0.24	0.16	0.6
										0.042	0	0.958	0.136	0.288	0.576
										0.083	0.067	0.85	0.517	0	0.483
										0.302	0	0.698	0	0	1
										0	0.476	0.524	0	0.348	0.652
										0	0.8	0.2	0.156	0.188	0.656
										0	1	0	0.28	0	0.72
										0	1	0	0	1	0
										0.197	0.053	0.75	0	1	0
										1	0	0	1	0	0
										0.292	0.094	0.615	0	0	1
										0	1	0	0	0.412	0.588
										0	0.481	0.519	0	0	1
										0.055	0.041	0.903	0.5	0.5	0
										0	0	1	0	0	1
										0.154	0.462	0.385	0	1	0
										0	1	0	0	0	1
										0.182	0	0.818	0	1	0
										0	1	0	0.188	0.438	0.375
										0	1	0	0	1	0
										1	0	0	0	0	1
										0	1	0	0	0.65	0.35
										0.143	0.643	0.214	1	0	0
										0	0.667	0.333	0.188	0	0.812
													0.101	0.116	0.783
										0	0.146	0.854	0.571	0	0.429
										0.466	0.523	0.011	0	0	1
										0.441	0.302	0.257	0	0.413	0.587
										0	0.2	0.8	0.455	0.545	0
										0.564	0.287	0.149	0	1	0
										1	0	0	0.267	0.433	0.3
										0.2	0.675	0.125	0	1	0
										1	0	0	0	0	1
										1	0	0
										0	1	0	0	1	0
										0	1	0	0.5	0.5	0
										0	1	0	0	1	0
										0	1	0	1	0	0
										0	1	0	0.436	0.423	0.141
										0.462	0.385	0.154	0	0.872	0.128
										0.2	0.68	0.12	1	0	0
										0	0.429	0.571	0.045	0.682	0.273
										0.714	0.286	0	0	1	0
										0	1	0	0	1	0
										0.25	0.231	0.519	0	1	0
										0.131	0.062	0.807	1	0	0
										0	1	0	1	0	0
										1	0	0	0	1	0
										0.647	0.353	0	0.092	0.908	0
										0.879	0	0.121	1	0	0
										0.929	0	0.071	0	1	0
										0.625	0.375	0	1	0	0
										0.917	0	0.083	0.429	0.286	0.286
										0.805	0.049	0.146	0.879	0	0.121
										0	1	0	1	0	0
										0	1	0	0.526	0.474	0
										0	1	0	0	1	0
										0	0.518	0.482	0	0.897	0.103
										0.8	0	0.2	0	0.935	0.065
										1	0	0	0	0.934	0.066
										0.577	0.423	0	0.051	0.734	0.215
										1	0	0	0	1	0
										1	0	0	0.778	0.222	0
										0.143	0.857	0	1	0	0
										1	0	0	0	1	0
										0	0.857	0.143	0.414	0.371	0.214
										0	1	0	0.079	0.197	0.724
										0.667	0.333	0	0	1	0
										0	0.857	0.143	0.571	0.224	0.205
										0	1	0	0	1	0
										1	0	0	0	1	0
										1	0	0	0	1	0
										0.889	0	0.111	0.636	0.364	0
										0.342	0.263	0.395	0	1	0
										0.23	0.122	0.649	1	0	0
										0.4	0.6	0	0.256	0	0.744
										0.818	0	0.182	0.132	0	0.868
										0.273	0.455	0.273	1	0	0
										0	1	0	1	0	0
										0	0.818	0.182	0	1	0
										0.575	0.15	0.275	0	1	0
										0.558	0.377	0.065	1	0	0
										0.286	0.048	0.667	0.556	0.111	0.333
										0	1	0	1	0	0
										0.103	0	0.897	0	1	0
										1	0	0	1	0	0
										0.591	0	0.409	0	1	0
										0	1	0	0.183	0	0.817
										0.35	0.65	0	0.377	0.59	0.033
										0	1	0	1	0	0
										1	0	0	0	0	1
										0	1	0	0	1	0
										0.231	0.769	0	0	0.529	0.471
										0.833	0	0.167	0	1	0
										0.909	0	0.091	0.111	0.685	0.204
										0	0	1	0.7	0.3	0
										1	0	0	0	1	0
										0	1	0	0	0.75	0.25
										1	0	0	0	0	1
										1	0	0	0.571	0.429	0
										0	1	0	0	1	0
										0	1	0	0	1	0
										0.154	0.077	0.769	0.222	0	0.778
										0.217	0	0.783	0.25	0.4	0.35
										0	0	1	0.792	0.208	0
										1	0	0	0.423	0.5	0.077
										0	1	0	0	1	0
										0.808	0	0.192	0.556	0	0.444
										1	0	0	0	1	0
										1	0	0	0	1	0
										0	1	0	0	1	0
										0	1	0	0	0.105	0.895
										0	1	0	0	0	1
										0	1	0	0	1	0
										0.8	0	0.2	0.387	0.516	0.097
										1	0	0	1	0	0
										0.727	0.273	0	0	1	0
										1	0	0	0	0	1
										0	0.724	0.276	1	0	0
										0.364	0.091	0.545
										0.778	0.222	0	0.409	0.591	0
										1	0	0	0.198	0.021	0.781
										0.165	0.253	0.582	1	0	0
										0.4	0.267	0.333	0.088	0.171	0.741
										1	0	0	0.918	0	0.082
										0.407	0	0.593	0.11	0.247	0.644
										0	1	0	0.246	0.266	0.488
										0	1	0	0	1	0
										0.435	0.565	0	0.051	0.094	0.855
										1	0	0	0	0.912	0.088
										0.644	0	0.356	0	1	0
										0	0	1	0.528	0.107	0.364
										0	1	0	0	0.8	0.2
										0	1	0	0.435	0.441	0.124
										0.909	0	0.091	0.029	0.27	0.701
										0.083	0.139	0.778	0	1	0
										0.188	0.812	0	1	0	0
										0	1	0	0.065	0.102	0.833
										0	0	1	0	1	0
										1	0	0	1	0	0
										1	0	0	0.667	0.333	0
										0	1	0	0.282	0.141	0.577
										1	0	0	0.075	0.425	0.5
										0	1	0	1	0	0
										0	1	0	0.333	0	0.667
										0.533	0.133	0.333	0.353	0.373	0.275
										0.588	0.324	0.088	0.218	0.309	0.473
										1	0	0	0.091	0	0.909
										0	1	0	0.158	0.372	0.47
										0	0.81	0.19	0	1	0
										0.846	0.154	0	1	0	0
										1	0	0	0	1	0
										1	0	0	0	0	1
										0	1	0
										0.481	0.222	0.296	1	0	0
										1	0	0	0.083	0.026	0.891
										0	0.368	0.632	1	0	0
										0.842	0.158	0	0.384	0	0.616
										0	1	0	1	0	0
										1	0	0	0	1	0
										1	0	0	0.242	0	0.758
										0	1	0	0	0	1
										0.24	0	0.76	0.381	0.214	0.405
										1	0	0	0	0	1
										0.812	0	0.188	1	0	0
										0	1	0	1	0	0
										1	0	0
										0	1	0	1	0	0
										0.462	0.385	0.154	0.455	0.515	0.03
										1	0	0	0.075	0.642	0.284
										0	0	1	1	0	0
										0	0	1	0.542	0.441	0.017
										0	1	0	0.237	0.04	0.722
										0	0	1	0.351	0.223	0.426
										0	1	0	1	0	0
										1	0	0	1	0	0
										0	1	0	0.895	0	0.105
										1	0	0	0.667	0.333	0
										0.3	0.7	0	1	0	0
										0	1	0	0	0.062	0.938
										0	1	0	0.267	0.733	0
										0	1	0	0.525	0.05	0.425
										0	1	0	0	1	0
										0	1	0	1	0	0
										0.089	0.02	0.891	0	0	1
										0	1	0	0.385	0.615	0
										0.357	0	0.643	1	0	0
										0	0.444	0.556	0.308	0.615	0.077
										1	0	0	0.929	0	0.071
										0	0	1	1	0	0
										0	1	0	0.949	0	0.051
										0	0.423	0.577	1	0	0
										1	0	0	1	0	0
										0	1	0	0	1	0
										0	1	0	0.23	0.135	0.635
										0	0.194	0.806	0	1	0
										1	0	0	0.24	0.202	0.558
										0	1	0	0	1	0
										0	0.742	0.258	0.027	0.162	0.811
										0	1	0	0	1	0
										1	0	0	0	1	0
										0	1	0	0	1	0
										1	0	0	0.135	0	0.865
										0	0	1	0	1	0
										0.429	0	0.571	0.407	0.593	0
													0.185	0.185	0.63
										1	0	0	0.6	0.4	0
										0.958	0	0.042	0	1	0
										1	0	0	0	1	0
										1	0	0	0	1	0
										0.101	0.41	0.488	1	0	0
										1	0	0	0	0.036	0.964
										0	1	0	0.02	0.17	0.81
										1	0	0	0.306	0.106	0.588
										1	0	0	0	1	0
										0	1	0	0.168	0.075	0.757
										0	0.81	0.19	0	1	0
										0	1	0	0	0	1
										1	0	0	0	0.737	0.263
										0.381	0	0.619	0	0.128	0.872
										0	1	0	1	0	0
										0	0.87	0.13	0	0	1
										1	0	0	0	0	1
										0.542	0.458	0	1	0	0
										0	1	0	0	1	0
										0.923	0	0.077	0	0.778	0.222
										0.308	0.538	0.154	0.127	0	0.873
										0	1	0	0.333	0	0.667
										0	0.688	0.312	0	1	0
										0	1	0	0	1	0
										0.293	0.147	0.56	0	1	0
										0	1	0	0	0	1
										1	0	0	0.222	0	0.778
										0	1	0	0.162	0.541	0.297
										0.15	0.225	0.625	0	0.357	0.643
										0	1	0	0	0	1
										0	1	0	0	1	0
										1	0	0	0	1	0
										1	0	0	0	1	0
										0.2	0.35	0.45	0.113	0.075	0.811
										1	0	0	1	0	0
										0	1	0	0	1	0
										0	1	0	0	1	0
										1	0	0	0	1	0
										0.098	0.073	0.829	0	1	0
										0.318	0.682	0	0.051	0.102	0.847
										0	1	0	0.12	0.72	0.16
										1	0	0	0	0	1
										0	1	0	0.2	0	0.8
										0.382	0.124	0.494	0	1	0
										0.347	0.467	0.187	0.243	0.324	0.432
										0	1	0
										0	1	0	0.109	0.18	0.71
										0.232	0	0.768	0	0.893	0.107
										0.214	0.643	0.143	0.174	0.717	0.109
										1	0	0	1	0	0
										0	1	0	0.195	0.154	0.65
										0	1	0	1	0	0
										0	1	0	1	0	0
										1	0	0	1	0	0
										0	0.949	0.051	1	0	0
										0.926	0.074	0	1	0	0
										0	1	0	0.113	0.859	0.028
										0	1	0	0	1	0
										0	1	0	0	1	0
										0	0.833	0.167	0.739	0	0.261
										1	0	0	0	0.909	0.091
										1	0	0	0.45	0.55	0
										0.457	0.457	0.086	0	0.741	0.259
										0	1	0	0.026	0.588	0.386
										1	0	0	0.5	0.423	0.077
										0	0.391	0.609	0	1	0
										0	1	0	0	1	0
										1	0	0	0.696	0	0.304
										0	1	0	0	1	0
										0	1	0	0.075	0.472	0.453
										0.651	0.116	0.233	0	0.924	0.076
										0	1	0	0	0.921	0.079
										0	1	0	0	1	0
										0	1	0	0	1	0
										0.459	0	0.541	0	1	0
										0	0.769	0.231	0	0	1
										0	1	0	1	0	0
										0	0.429	0.571	0.133	0.4	0.467
										1	0	0	0	0.933	0.067
										0	1	0	0	1	0
										1	0	0	0.8	0	0.2
										0.444	0.556	0	1	0	0
										0.727	0	0.273	1	0	0
										1	0	0	0	1	0
										0.611	0.306	0.083	0.042	0.958	0
										0	1	0	0.387	0.454	0.16
										0.441	0.382	0.176	1	0	0
										0	0.75	0.25	1	0	0
										0	1	0	0	1	0
										0	1	0	0.8	0	0.2
										1	0	0	0.119	0.448	0.433
										0.088	0.912	0	0	1	0
										0	1	0	0	1	0
										0	1	0	0	0.467	0.533
										1	0	0	0	0.4	0.6
										0	0.013	0.987	0	1	0
										0	1	0	0	1	0
										0.583	0	0.417	1	0	0
										0	1	0	0	1	0
										0	1	0	0.358	0	0.642
										0	1	0	0.398	0	0.602
										0	1	0	0.579	0.421	0
										0	1	0	0.696	0.179	0.125
										1	0	0	0	1	0
										0	1	0	0.688	0.312	0
										0	1	0	0.394	0.606	0
										0	0	1	0	1	0
										0	0.017	0.983	1	0	0
										0.284	0.147	0.569	0.143	0.048	0.81
										0.5	0.5	0	0	0.811	0.189
										0	1	0	0.257	0	0.743
										1	0	0	0	0.769	0.231
										0	0.333	0.667	0.8	0	0.2
										0.04	0	0.96	1	0	0
										0.057	0.163	0.78	0	0	1
										1	0	0	0	1	0
										1	0	0	0.133	0.867	0
										0	1	0	0	1	0
										0	1	0	0	1	0
										0	1	0	0.907	0	0.093
										0	0.333	0.667	1	0	0
										0.562	0	0.438	0	1	0
										0	1	0	1	0	0
										0.786	0.214	0	0	1	0
										0.2	0	0.8	0	1	0
										1	0	0	1	0	0
										0.292	0.292	0.417	0	1	0
										1	0	0	1	0	0
										0.029	0	0.971	0	1	0
										0	1	0	1	0	0
										0	0	1	0	1	0
										0	0.143	0.857	0.4	0.375	0.225
										0	1	0	0	0	1
										0	1	0	0.605	0.395	0
										0	1	0	1	0	0
										0	1	0	0.133	0.4	0.467
										1	0	0	1	0	0
										1	0	0	0	0	1
										0	1	0	1	0	0
										1	0	0	1	0	0
										1	0	0	0.118	0.882	0
										0	1	0	1	0	0
										0.25	0.188	0.562	1	0	0
										0	1	0	0	0.171	0.829
										1	0	0	0	0	1
										1	0	0	1	0	0
										0	1	0	0	0	1
										0	1	0	0	1	0
										0	1	0	0	1	0
										1	0	0	1	0	0
										0	1	0	0.643	0.357	0
										0	1	0	1	0	0
										0	0	1	0	0.044	0.956
										0.312	0.688	0	1	0	0
										0.46	0	0.54	0.125	0.422	0.453
										0	1	0	0	1	0
										0.917	0.083	0	0	1	0
										0.692	0	0.308	0	0.32	0.68
										0	0	1	0	0.514	0.486
										0.118	0	0.882	0	1	0
										0	1	0	0	1	0
										0	0.75	0.25	0	1	0
										0	0	1	0	1	0
										0.538	0.103	0.359	1	0	0
										0	1	0	0	0	1
										0	0.632	0.368	0	0	1
										0.444	0.556	0	0	0.053	0.947
													0	1	0
										0.031	0.314	0.655	0	0	1
										1	0	0	0.318	0	0.682
										0	1	0	0	1	0
										0.368	0.632	0	0.304	0.696	0
										0	1	0
										0	0.891	0.109	0.202	0.798	0
										0.169	0.02	0.811	0.156	0.688	0.156
										1	0	0	0.077	0.308	0.615
										0	0.902	0.098	0	1	0
										0	1	0	0.149	0.658	0.193
										0	1	0	0.5	0.107	0.393
										0.489	0.319	0.191	0.075	0.839	0.086
										0.079	0.622	0.299	0.116	0.027	0.857
										1	0	0	0	0.961	0.039
										0.483	0	0.517	0	1	0
										0	0.932	0.068	0	0.333	0.667
										0.44	0.4	0.16	0.209	0.139	0.652
										1	0	0	0.582	0.2	0.218
										0	1	0	0.188	0.594	0.219
										0.243	0.162	0.595	0.34	0.283	0.377
										0	1	0	0.258	0.29	0.452
										0	1	0	0	0.588	0.412
										0	0.94	0.06	1	0	0
										0	0.688	0.312	0	1	0
										0.919	0.081	0	0	1	0
										1	0	0	1	0	0
										0.304	0.696	0	0.301	0.041	0.658
										0	0.889	0.111	0	1	0
										0	1	0	0	0	1
										0	0.524	0.476	0.229	0.562	0.208
										0	0.935	0.065	0	0.117	0.883
										0.347	0.594	0.059	0.72	0.28	0
										0	1	0	0	0.767	0.233
										0	1	0	0.286	0.411	0.304
										0.192	0.038	0.769	1	0	0
										1	0	0	0.282	0.603	0.115
										1	0	0	0.463	0	0.537
										0.606	0	0.394	0	1	0
										0	1	0	0	1	0
										1	0	0	0	1	0
										0	1	0	0	1	0
										0.194	0	0.806	0	0	1
										0	0.375	0.625	0	0.455	0.545
										1	0	0	0	0	1
										0	1	0
										0	1	0	0.45	0.02	0.53
										0	1	0	0	0.848	0.152
										0.085	0	0.915	0	0.519	0.481
										0.553	0.194	0.252	0	1	0
										0	1	0	0	0.316	0.684
										0.271	0.187	0.542	0.392	0.446	0.162
										0	1	0	0	1	0
										1	0	0	0.321	0.464	0.214
										0	0.097	0.903	0	1	0
										0	1	0	0.506	0.39	0.104
										0	1	0	1	0	0
										0.378	0.135	0.486	0.837	0.023	0.14
										0	1	0	1	0	0
										0.39	0.293	0.317	0.439	0.228	0.333
										0.676	0	0.324	1	0	0
										0	1	0	0.415	0.092	0.492
										1	0	0	0.556	0.389	0.056
										0.148	0.667	0.185	0.692	0.308	0
										0	0.463	0.537	1	0	0
										0	1	0	0	0	1
										0	1	0	0.429	0.571	0
										1	0	0	0.375	0	0.625
										0.5	0	0.5	0	0.265	0.735
										1	0	0	0.045	0.019	0.936
										0.167	0.3	0.533	1	0	0
										0	1	0	0.22	0.134	0.645
										0	1	0	0	1	0
										0.045	0.284	0.67	0	1	0
										1	0	0	0.037	0.119	0.844
										0.108	0.376	0.516	0.36	0	0.64
										0	0	1	0.082	0.882	0.035
										0.267	0	0.733	1	0	0
										1	0	0	0.112	0.067	0.82
										0.212	0.091	0.697	0.511	0.136	0.352
										1	0	0	0.5	0.5	0
										1	0	0	0	1	0
										1	0	0	0	1	0
										1	0	0	0.547	0.453	0
										0	1	0	0.4	0.46	0.14
										0	1	0	0	0.758	0.242
										1	0	0	0	0	1
										0	1	0	0.144	0.043	0.813
										0	0	1	0	1	0
										0.516	0.421	0.063	0.216	0.557	0.227
										0	0.333	0.667	0.17	0.074	0.755
										0	1	0	0.722	0.194	0.083
										0.438	0.25	0.312	0	0	1
										1	0	0	0	1	0
										1	0	0	0.687	0.125	0.187
										0	1	0	0	0	1
										0	0.773	0.227	0	0.75	0.25
										0	1	0	0	0.289	0.711
										0.116	0	0.884	0	0	1
										0	1	0	0	0	1
										0.116	0.316	0.568	0	1	0
										1	0	0	0	0.793	0.207
										0.321	0.049	0.63	0.583	0.417	0
										0.667	0.333	0	1	0	0
										0	0	1	0.52	0.48	0
										0	0.136	0.864	0	0	1
										0	1	0	1	0	0
										0	0	1	1	0	0
										0	0	1	0	0.113	0.888
										0	1	0	0.6	0.114	0.286
										1	0	0	0	0	1
													0.582	0.165	0.253
										0	1	0	0.561	0	0.439
										0.944	0	0.056	1	0	0
										0	0.197	0.803	1	0	0
										0.411	0.361	0.228	1	0	0
										0	1	0	1	0	0
										0	1	0	1	0	0
										0	1	0	0	0	1
										0	0.125	0.875	0	0	1
										1	0	0	0	0.957	0.043
										0.525	0.475	0	0.173	0.712	0.115
										0	1	0	0	1	0
										0.321	0.125	0.554	0	0	1
										0.444	0.556	0	1	0	0
										0.475	0.325	0.2	1	0	0
										0	0.808	0.192	0.17	0.511	0.319
										1	0	0	0	1	0
										1	0	0	0.286	0.714	0
										0.232	0.28	0.488	0.087	0.717	0.196
										0	1	0	1	0	0
										0	1	0	0	1	0
										0	0	1	0	1	0
										1	0	0	0.8	0.08	0.12
										0	0.22	0.78	0	1	0
										0.417	0.333	0.25
										0.261	0.227	0.511	0.951	0	0.049
										0	1	0	1	0	0
										0.019	0.078	0.903	0	1	0
										0	1	0	0.052	0.003	0.945
										0.516	0.355	0.129	0	0.946	0.054
										1	0	0	0	1	0
										1	0	0	0	0.756	0.244
										0	0	1	0.7	0.233	0.067
										1	0	0	0	1	0
										0	1	0	0.256	0	0.744
										0.273	0.345	0.382	1	0	0
										1	0	0	0	1	0
										0	1	0	0.266	0.688	0.047
										0	0.839	0.161	0	1	0
										0.12	0.56	0.32	1	0	0
										1	0	0	0.739	0.174	0.087
										0.4	0	0.6	0	1	0
										0	1	0	0.12	0.14	0.74
										0	1	0	1	0	0
										0	1	0	0.5	0.5	0
										0	1	0	0.474	0.237	0.289
										0	1	0	0	1	0
										0	0	1	0	0.045	0.955
										0.72	0.28	0	0.122	0.415	0.463
										0.76	0	0.24	0	0.778	0.222
										0.424	0	0.576	0	1	0
										1	0	0	0	1	0
										0.485	0.182	0.333	0.667	0.333	0
										0	0.821	0.179	0	1	0
										0	1	0	0.588	0.412	0
										0.073	0.463	0.463	0	1	0
										0	1	0	0.292	0.708	0
										0	1	0	0	1	0
										0.6	0	0.4	0.5	0.5	0
										0	1	0	0	1	0
										0.513	0.308	0.179	0.333	0.667	0
										0.25	0.077	0.673	1	0	0
										0	0.137	0.863	0	1	0
										0	0	1	1	0	0
										0	0	1	0	0.48	0.52
										0.387	0.129	0.484	0	1	0
										0	1	0	0.643	0.357	0
										0.711	0	0.289	0.25	0.6	0.15
										0	0.263	0.737	0.837	0.112	0.051
										0	0	1	0.483	0.403	0.114
										1	0	0	1	0	0
										1	0	0	0.77	0	0.23
										1	0	0	0.556	0.444	0
										1	0	0	1	0	0
										0.286	0.204	0.51	1	0	0
										0	1	0	0.792	0.208	0
										1	0	0	0	1	0
										1	0	0	0	1	0
										1	0	0	1	0	0
										0.211	0.368	0.421	1	0	0
										0.49	0	0.51	0	1	0
										0	0.296	0.704	1	0	0
										0	1	0	0	1	0
										1	0	0	1	0	0
										1	0	0	0.5	0.5	0
										0.25	0	0.75	0	1	0
										0.583	0	0.417	0	0.416	0.584
										0.889	0.111	0	0.86	0	0.14
										0	1	0	0.227	0.613	0.16
										0.643	0.357	0	0.582	0.418	0
										0	0	1	0	1	0
										1	0	0	0.636	0.364	0
										1	0	0	0.389	0.472	0.139
										0	0.75	0.25	0	1	0
										0	1	0	0	1	0
										1	0	0	0.143	0.857	0
										0.345	0.138	0.517	0.467	0	0.533
										1	0	0	0	0.765	0.235
										1	0	0	1	0	0
										0	1	0	0	1	0
										0	0	1	0.84	0	0.16
										0	1	0	0.123	0	0.877
										0	0	1	0.206	0.794	0
										0	1	0	0.863	0.075	0.062
										0	1	0	0.466	0.261	0.273
										0	1	0	0	1	0
										0.286	0.214	0.5	0	0	1
										1	0	0	1	0	0
										0	0.692	0.308	0	1	0
										0	1	0	1	0	0
										0	1	0	0	1	0
										0	0.889	0.111	0	1	0
										1	0	0	0	1	0
										0	1	0	0	1	0
										0	1	0	0	1	0
										1	0	0	0	1	0
										0	0.429	0.571	1	0	0
										0	0	1	0	1	0
										1	0	0	0	1	0
										0	1	0	1	0	0
										0.167	0.167	0.667	0	1	0
										0	0	1	0	1	0
										1	0	0	0	1	0
										0	1	0	0	0.05	0.95
										1	0	0	0	0	1
										0	1	0	0	1	0
										0	1	0	0	1	0
													1	0	0
										0.5	0.5	0	0.378	0.135	0.486
										0.085	0.678	0.237	1	0	0
										1	0	0	0.054	0.179	0.768
										0.947	0	0.053	0.583	0.417	0
										0.171	0.724	0.106	0	0.047	0.953
										0	0.342	0.658	0	1	0
										1	0	0	0.6	0.4	0
										0.19	0.357	0.452	1	0	0
										0	1	0	0	1	0
										0.144	0.367	0.489	1	0	0
										0.125	0.055	0.82	1	0	0
										0	1	0	1	0	0
										0.02	0.035	0.945	0	1	0
										0.197	0.145	0.658	0	1	0
										0.078	0.765	0.157	0	1	0
										1	0	0	0.35	0.65	0
										0.101	0.061	0.838	0	0.191	0.809
										1	0	0	1	0	0
										0.238	0.059	0.703	0.189	0.811	0
										0	1	0	0	0	1
										0.653	0	0.347	0	1	0
										0	1	0	1	0	0
										0	1	0	1	0	0
										0.286	0.714	0	1	0	0
										0.5	0.5	0	0	1	0
										1	0	0	0.636	0.364	0
										0.313	0.122	0.565	0	1	0
										0.474	0.211	0.316	1	0	0
										1	0	0	1	0	0
										1	0	0	1	0	0
										0.286	0.19	0.524	0.25	0.75	0
										0	0	1	0	1	0
										0.065	0.129	0.806	0.06	0	0.94
										0	1	0	0.119	0.172	0.709
										0	1	0
										0.414	0	0.586	0.343	0.131	0.526
										1	0	0	0.182	0.5	0.318
										0.622	0.222	0.156	0.571	0.429	0
										1	0	0	0	0.986	0.014
										0	1	0	0.328	0.173	0.498
										0	0.559	0.441	0.184	0.513	0.303
										0.037	0.741	0.222	0	1	0
										0.312	0.094	0.594	0.123	0.738	0.138
										0.096	0	0.904	1	0	0
										0	1	0	0.441	0.559	0
										0.833	0.167	0	0	1	0
										0.076	0	0.924	0	1	0
										0.227	0.273	0.5	0.404	0.079	0.517
										1	0	0	1	0	0
										0.437	0.208	0.354	0.423	0	0.577
										0.939	0	0.061	0.291	0.046	0.663
										0	1	0	0	1	0
										0.094	0.05	0.856	0	1	0
										0.583	0.262	0.155	0.452	0.548	0
										1	0	0	1	0	0
										1	0	0	1	0	0
										0.753	0.173	0.074	0	0.105	0.895
										1	0	0	0.135	0.61	0.255
										0.065	0.129	0.806	0	1	0
										0	1	0	0	1	0
										0.885	0.115	0	0.635	0.317	0.048
										1	0	0	0	1	0
										0	0.304	0.696	0.178	0.444	0.378
										0.145	0.455	0.4	0.611	0.25	0.139
										0.267	0.233	0.5	0	0.815	0.185
										0	1	0	0.463	0.537	0
										0.204	0.088	0.708	0	1	0
										0.098	0.116	0.786	0	1	0
										0	0.889	0.111	0.9	0	0.1
										0.16	0	0.84	1	0	0
										0	1	0	0	1	0
										0	1	0	0.25	0.75	0
										0	1	0	0	0	1
										1	0	0	0.389	0.611	0
										0.5	0.5	0	1	0	0
										1	0	0	0.429	0.429	0.143
										0.3	0.7	0	0	1	0
										0	0.321	0.679	1	0	0
										0	0.321	0.679
										1	0	0
										1	0	0
										0.5	0.5	0
										0	0.046	0.954
										0.267	0.367	0.367
										0	0	1
										1	0	0
										1	0	0
										1	0	0
										0.842	0	0.158
										0.267	0.333	0.4
										0.231	0.769	0
										0.667	0.333	0
										0.122	0.755	0.122
										0	1	0
										0.036	0	0.964
										0	0	1
										0.706	0	0.294
										0	1	0
										0	0	1
										0	1	0
										1	0	0
										1	0	0
										0.7	0.3	0
										0.461	0.369	0.17
										0	1	0
										0	1	0
										0.333	0.204	0.463
										1	0	0
										1	0	0
										0.073	0.04	0.887
										0	0.748	0.252
										0	0.71	0.29
										0	0	1
										0.065	0.055	0.88
										0	0.873	0.127
										0	1	0
										0	1	0
										0.187	0.812	0
										0.294	0.176	0.529
										0	0.625	0.375
										0.076	0	0.924
										1	0	0
										0	1	0
										0	1	0
										0.917	0.083	0
										0	0.98	0.02
										0	1	0
										0.333	0.607	0.06
										0.41	0.59	0
										0.061	0.939	0
										1	0	0
										0.529	0	0.471
										1	0	0
										0.143	0.357	0.5
										0	1	0
										0	0.963	0.037
										0.797	0.122	0.081
										0	0.866	0.134
										1	0	0
										0.121	0.2	0.679
										1	0	0
										0.333	0.067	0.6
										0.113	0	0.887
										0.211	0	0.789
										0	0	1
										0	0	1
										0.716	0.207	0.078
										0.342	0.104	0.554
										0.191	0.17	0.638
										0.2	0.178	0.622
										1	0	0
										0	1	0
										0	0.08	0.92
										0.207	0.069	0.724
										1	0	0
										0.667	0.333	0
										0	1	0
										0	0.425	0.575
										0	1	0
										0	0	1
										0	0	1
										0	0	1
										0	1	0
										0	1	0
										1	0	0
										1	0	0
										0.81	0	0.19	0.024	0.393	0.583	0.549	0.451	0
										1	0	0	0	1	0	0.118	0.677	0.204
										0.12	0.158	0.721	0.071	0.404	0.526	0	1	0
										0.235	0.131	0.633	0	0.87	0.13	1	0	0
										0.233	0.2	0.567	0.154	0.821	0.026	0	1	0
													0.012	0.018	0.969	0.5	0.5	0
										0.117	0	0.883	0	1	0	0.3	0.5	0.2
										0.303	0.061	0.636	0.312	0.688	0	0	1	0
										0.024	0.614	0.361	0	0	1	0.527	0.473	0
										0.394	0.606	0	0.544	0	0.456	1	0	0
										0	0.92	0.08	0	0.941	0.059	0	1	0
										0.232	0.188	0.58	0.099	0.044	0.857	0	1	0
										0	1	0	0.121	0.048	0.831	0	0.879	0.121
										0.056	0.391	0.553	0	0	1	0.396	0.302	0.302
										0	1	0	0	1	0	0.114	0	0.886
										0	1	0	0.08	0	0.92	0.379	0.241	0.379
										0	1	0				0.458	0.125	0.417
										0	1	0	0	0.889	0.111	0.213	0.033	0.754
										0	1	0	1	0	0	0.792	0.208	0
										0	1	0	0	1	0	0.464	0.125	0.411
										0	0.943	0.057	0.244	0.372	0.384	0	0.879	0.121
										0	1	0	0.312	0.269	0.419	0.364	0.25	0.386
										0	1	0	0.419	0.04	0.54	0	0	1
										0.565	0.087	0.348	0.348	0.652	0	0	1	0
										1	0	0	0.075	0.925	0	0	1	0
										1	0	0	0.242	0.505	0.253	0	0.156	0.844
										0.453	0.094	0.453	0	0.233	0.767	0.588	0.07	0.342
										0	1	0	0	0.847	0.153	0	0.946	0.054
										1	0	0	0	1	0	0.45	0.4	0.15
										0.585	0.366	0.049	0	0.913	0.087	0	1	0
										0	1	0	1	0	0	0.467	0.533	0
										0	0.586	0.414	0.906	0	0.094	0	1	0
										0	0.579	0.421	0	1	0	0.562	0.438	0
										1	0	0	0.429	0.571	0	0	0	1
[truncated: 1,266 more rows]
