# Supplementary material for: Regulation of different phases of AMPA receptor intracellular transport by 4.1N and SAP97
Source: eLife journal article supplement (doi:10.7554/elife.85609), 2023-04-06
Supplement: fig4-data1 [file Figure 4.xlsx]

## Sheet: IT
Fig 4B	Ves number	SCR	shSAP97	WT	d7	Mean speed	IN/OUT, Scr	IN/OUT, ShSAP97	IN/OUT, WT	IN/OUT, D7	Move/pause	Scr, IN/OUT	Scr, PAUSE	Sh, IN/OUT	Sh, PAUSE	WT, IN/OUT	WT, PAUSE	D7, IN/OUT	D7, PAUSE
		8.1565	12.818				1.68212	1.41005				1	0	0.931	0.069
		7.84108	2.85117				1.43379	1.454				0.152	0.847	1	0
		6.3675	20.0415				1.08562	1.13478				0.975	0.025	0.397	0.603
		25.7824	0.950922				1.66769	0.816667				1	0	1	0
		16.0445	0.703284				1.27672	1.652				1	0	1	0
		59.0321					1.98953					1	0	0	1
		6.31057					1.32285					1	0	1	0
		30.689					2.03056					1	0	1	0
												0.96	0.04	1	0
		16.4147	2.46866				1.79996	1.51915				1	0	0.157	0.843
		6.60116	9.43572				1.87767	1.28911				1	0	0.282	0.717
			4.83115				1.16083	1.34951				0.742	0.258	0.731	0.269
			1.02445				1.71333	0.395				1	0	1	0
		17.5502	4.17694				1.27306	3.24833				1	0	0.362	0.637
		27.3134	6.21636				2.07872					1	0	1	0
		10.5529	4.56906				1.31621					1	0	0.273	0.727
		12.4691	3.33552				2.07119					0.676	0.324	0.423	0.577
		28.5037										1	0	1	0
							1.5496	1.389				0.854	0.146	1	0
		8.88174					1.5435	1.29632				1	0	1	0
								1.54684				1	0	1	0
		5.67085						1.1435				0	1	1	0
		43.8157					1.49773	1.54027				1	0	1	0
		11.7901					2.07077	1.8819				0.867	0.133	1	0
							1.34655	1.47617				1	0	0.082	0.918
		20.013	1.76086				1.04016	1.31635				1	0	0.598	0.402
		21.2794	9.89769				2.0609					1	0	0.048	0.952
		7.00607	4.71758									0	1	0.147	0.852
		29.895	0.628486				0.995133					1	0	0.306	0.694
		22.6471	19.9951									0.356	0.644	0.622	0.378
		18.1483	8.02995				1.05376					1	0	1	0
		27.6097	2.64982				2.00801					1	0	1	0
		5.38126	8.60742				1.08738					1	0	1	0
												1	0	0.027	0.973
							1.82527	1.31737				0.291	0.708	0	1
		17.4049					1.62089	1.39077				1	0	1	0
		33.5576						1.58943				1	0	0.882	0.118
		10.2653						0.4355				0.394	0.606	0	1
							1.74845	1.42215				1	0	1	0
							2.37387	1.48986				1	0	1	0
							1.79353	0.993125				0.364	0.636	1	0
					5.89587		1.20244	1.35773				1	0	1	0
				13.5942	15.2651		1.76437							1	0
				11.6408	19.3196							1	0	1	0
				22.1514	0.43064		0.941206					1	0	1	0
				14.4175	11.2541							0.347	0.653	1	0
					26.289		1.07778					0.783	0.217	1	0
					7.99184		1.93485					1	0	0.252	0.748
					0.364754		1.24932					1	0	1	0
					19.5237							1	0	0.077	0.923
							2.61033	1.1876				1	0	0.097	0.903
							2.48076	1.96241				0.343	0.657	1	0
							1.39945	2.2475				1	0	0.408	0.592
							2.18037	0.509				0.667	0.333	1	0
							2.27908	2.10151				0.326	0.674	1	0
							1.76718	2.13242				0.818	0.182	1	0
				6.71795	1.43319		1.78946	0.716364				1	0	1	0
				9.35402	0.992956		1.25244	1.65084				1	0	1	0
					1.02674							1	0	0	1
				6.18169	14.1884							1	0	0.091	0.909
				26.4112	2.43019		1.66172					1	0	1	0
				15.2231	7.71114		2.09982					1	0	1	0
					4.29715		1.55426					1	0	0	1
					2.53888							1	0	0	1
					0.168001		2.46979	0.97925				1	0	0	1
					13.3338		2.13073	1.92674				1	0	0.113	0.887
					0.896911		1.30229	1.83152				1	0	1	0
					0.88596		2.30755	0.696				1	0	1	0
							2.32435	2.3513				1	0	1	0
				32.7393	13.0425		1.74774	2.41749				1	0	1	0
				7.61905	22.4296		1.83765	0.718818				0.583	0.417	1	0
				16.3409	10.1125		1.05887	1.42133				0	1	0.75	0.25
					9.77457							1	0	0.269	0.731
				14.3925	14.1576							0.563	0.438	1	0
				24.1161	20.7397		1.5152					0	1	0	1
				14.0489	10.433		2.14835					0	1	0	1
					5.2261		1.48686					0	1	0.16	0.84
					8.2253							1	0	1	0
				9.88003	23.6344							0	1	0.27	0.73
					12.7204							1	0	1	0
				21.7979	11.1868							1	0	1	0
					13.1227							1	0	0.134	0.866
				31.3584	33.7236							1	0	1	0
					36.5411					0.714526		0.471	0.529	0.528	0.472
					5.61368				1.16781	1.21124				1	0
					9.09804				1.32265	1.29085		1	0	1	0
									1.54282	1.18622		0.719	0.281	1	0
									1.27958	1.80794		1	0	0.286	0.714
										1.3471		0.747	0.253	0.818	0.182
										1.09675		1	0	1	0
										1.24742		0.4	0.6	1	0
												1	0	1	0
												0.942	0.057	0.031	0.969
												1	0	0	1
												1	0	0	1
												1	0	1	0
												0	1	1	0
										1.14859		0	1	1	0
									1.09961	1.36783		0	1	1	0
									1.51055	1.2869		1	0	1	0
									1.4598	1.4648		1	0	1	0
									2.51083	1.8923		0	1	1	0
										1.24487		0.487	0.513	0	1
										1.27267		1	0	1	0
										1.34416		1	0	0	1
												1	0	1	0
												1	0
												1	0	1	0
												0.592	0.407	1	0
												1	0	0.89	0.11
												1	0	0.802	0.198
									1.26515	1.10471		0.18	0.82	1	0
									1.83911	0.424		0.453	0.547	0.259	0.742
										0.4415		0.623	0.377	1	0
									1.61441	1.86932		1	0	1	0
									2.0518	0.51425		0.869	0.131	0.588	0.412
									1.68409	1.8156		0.621	0.379
										1.55661		1	0	0.619	0.381
										0.738333		1	0	0.72	0.279
												1	0	0.953	0.047
										1.77072		0	1	1	0
										0.803		1	0	0.495	0.504
										1.38183		1	0	0.142	0.858
												1	0	0.663	0.337
									0.896385	1.0112		1	0	0.507	0.493
									1.60389	0.7045		0.336	0.664	0.154	0.846
										0.5288		0	1	0.358	0.643
									1.32225	1.8455		0.871	0.129	1	0
									2.14746	0.5014		0.889	0.111	0.91	0.09
									1.63606	1.54393		1	0	1	0
										1.00924		1	0	0.608	0.392
										0.7238				0.294	0.706
												1	0	0.018	0.982
										1.66308		1	0	1	0
										2.872		0.076	0.924	0.041	0.959
										1.0914		0.365	0.635	0.595	0.405
														1	0
										1.9066		1	0	1	0
									1.89203	2.29792		0.25	0.75	0.09	0.91
									1.64059	1.27506		1	0	0.286	0.714
									1.48559	1.39277		1	0	0.377	0.622
										1.37818		0.254	0.746	1	0
									2.24042	1.3568		1	0	0	1
									2.5318	0.9801		1	0	1	0
									1.80272	0.858643		1	0	1	0
										1.78123		1	0	0.227	0.773
										1.89983		1	0	0.444	0.556
									1.4814	1.59649		1	0	0	1
										1.27094		0.082	0.918	0.419	0.581
									1.88777	1.21654		1	0	1	0
										1.68517		0	1	1	0
									2.58265	2.18981		0.928	0.072	0.824	0.176
										1.60576		0.87	0.13	1	0
										1.62691		1	0	1	0
												1	0	1	0
										1.85702		1	0	1	0
									1.57102	2.31105		1	0	0.929	0.07
									1.21407	1.50421		1	0	1	0
									1.62582	2.0748		1	0	1	0
										1.45756		1	0	1	0
									2.35768	1.55182		1	0	0.377	0.623
									2.47183	1.41703		1	0	1	0
									1.85907	1.28321		0.817	0.183	1	0
										1.37357		0	1	1	0
										1.85903		1	0	1	0
									1.46491	1.66543		1	0	1	0
										1.37485		0	1	0.643	0.357
									1.98421	1.54573		1	0	0.125	0.875
										1.6403		1	0	0	1
									2.59733	2.35878		0.24	0.76	1	0
										1.48035		1	0	0	1
										1.56705		1	0	0.727	0.273
												0.697	0.303	0	1
												1	0	0.774	0.227
												1	0	1	0
												1	0	0.696	0.304
												0.587	0.414	1	0
												0.127	0.873	1	0
												1	0	0.429	0.571
												1	0	0.15	0.85
												1	0	0	1
												0.088	0.912	0.42	0.58
												1	0	0	1
												0.967	0.033	0.767	0.233
												0.132	0.868	1	0
												1	0	1	0
												0.939	0.061	1	0
												0.028	0.972	0.257	0.743
												1	0	1	0
												1	0	0	1
												1	0	1	0
												1	0	1	0
												1	0	0	1
												1	0	0	1
												1	0	1	0
												1	0	1	0
												1	0	1	0
												0.677	0.324	0	1
												1	0	0.062	0.938
												1	0	0.289	0.711
												1	0	1	0
												1	0	0.655	0.345
												0.228	0.773	0.333	0.667
												0.174	0.826	1	0
												0.5	0.5	1	0
												0.659	0.341	0	1
												0.306	0.693	0	1
												1	0	1	0
												1	0	1	0
												0	1	1	0
												1	0	1	0
												1	0	1	0
												1	0	1	0
												1	0	1	0
												1	0	0.309	0.691
												1	0	0	1
												1	0	1	0
												1	0	0.85	0.15
												0.645	0.355	1	0
												1	0	1	0
												1	0	1	0
												1	0	0.347	0.652
												1	0	0	1
												1	0
												0.2	0.8	0.895	0.105
												0.686	0.314	0.853	0.148
												1	0	0.394	0.606
												1	0	0	1
												1	0	0	1
												1	0
												0.174	0.826	0.098	0.903
												0.361	0.639	1	0
												1	0	1	0
												1	0
												1	0
												0.545	0.455
												1	0
												1	0
												1	0
												1	0
												0.814	0.185
												1	0
												1	0
												0	1
												0.42	0.581
												1	0
												0	1
												1	0
												1	0
												1	0
												1	0
												0	1
												0	1
												1	0
												0.588	0.412
												0.063	0.936
												0.549	0.45
												1	0
												0.641	0.359
												1	0
												1	0
												0.321	0.679
												0.889	0.111
												0.714	0.287
												1	0
												0.674	0.326
												1	0
												0.78	0.221
												0.81	0.19
												0.634	0.365
												0.892	0.108
												1	0
												0.279	0.721
												0.924	0.076
												1	0
												0.494	0.507
												0.101	0.899
												1	0
												0.825	0.175
												0	1
												1	0
												1	0
												0.819	0.18
												0.863	0.137
												0.25	0.75
												0	1
												1	0
												1	0
												0.883	0.116
												0	1
												1	0
												1	0
												0.143	0.857
												0.864	0.136
												1	0
												1	0
												1	0
												1	0
												1	0
												0.765	0.235
												1	0
												1	0
												1	0
												0.667	0.333
												0.75	0.25
												1	0
												1	0
												0	1
												1	0
												0.666	0.333
												0.625	0.375
												0	1
												0	1
												0.813	0.188
												1	0
												0.387	0.613
												1	0
												0	1
												1	0
												0.612	0.389
												1	0
												0.921	0.079
												0.588	0.412
												1	0
												1	0
												0.382	0.618
												1	0
												1	0
												0.75	0.25
												1	0
												1	0
												1	0
												1	0
												0.286	0.714
												0.312	0.688
												1	0
												0.733	0.267
												0.571	0.429
												1	0
												1	0
												1	0
												1	0
												1	0
												1	0
												1	0
												1	0
												0.269	0.731
												0.221	0.779
												0.275	0.725
												0.394	0.606
												0.429	0.571
												1	0
												1	0
												1	0
												0	1
												0	1
												0.839	0.161
												0.429	0.571
												1	0
												0	1
												0	1
												1	0
												1	0
												1	0
												0.806	0.194
												1	0
												1	0
												0.264	0.736
												1	0
												0.961	0.039
												0.295	0.705
												0.615	0.385
												0.95	0.05
												0.743	0.257
												1	0
												1	0
												1	0
												1	0
												1	0
												1	0
												1	0
												1	0
												1	0
												0.85	0.15
												1	0
												1	0
												1	0
												1	0
												0.144	0.856
												0.946	0.054
												1	0
												1	0
												1	0
												1	0
												1	0
												1	0
												1	0
												1	0
												0.813	0.188
												1	0
												1	0
												0.331	0.669
												0.697	0.303
												1	0
												0.194	0.806
												1	0
												1	0
												1	0
												1	0
												1	0
												1	0
												1	0
												1	0
												0.927	0.073
												1	0
												0.839	0.162
												1	0
												1	0
												0	1
												0.829	0.171
												1	0
												0.471	0.529
												0.737	0.263
												0.821	0.179
												1	0
												1	0
												0.192	0.808
												1	0
												1	0
												1	0
												1	0
												0.4	0.6
												0.801	0.198
												1	0
												1	0
												0.25	0.75
												1	0
												1	0
												1	0
												1	0
												1	0
												1	0
												1	0
												0.186	0.814
												0.523	0.477
												1	0
												1	0
												1	0
												0.938	0.062
												1	0
												1	0
												1	0
												1	0
												1	0
												1	0
												1	0
												1	0
												0.5	0.5
												1	0
												1	0
												1	0
												1	0
												1	0
												0.274	0.726
												1	0
												1	0
												0.571	0.429
												1	0
												1	0
												1	0
												1	0
												0.667	0.333
												1	0
												0.605	0.395
												0.868	0.132
												1	0
												0.411	0.59
												1	0
												1	0
												0.396	0.604
												1	0
												1	0
												0.722	0.277
												1	0
												1	0
												0.14	0.86
												1	0
												1	0
												1	0
												0.419	0.581
												1	0
												0.667	0.333
												1	0
												1	0
												1	0
												1	0
												1	0
												1	0
												1	0
												0.728	0.273
												1	0
												1	0
												1	0
												1	0
												0	1
												1	0
												1	0
												1	0
												0	1
												0.72	0.28
												0.763	0.237
												0	1
												1	0
												1	0
												1	0
												0.72	0.28
												1	0
												1	0
												0.51	0.489
												1	0
												1	0
												1	0
												1	0
												1	0
												1	0
												1	0
												1	0
												1	0
												1	0
												0	1
												1	0
												1	0
												1	0
												1	0
												1	0
												1	0
												1	0
												1	0
												1	0
												0	1
												0.727	0.273
												1	0
												0.385	0.615
												1	0
												1	0
												1	0
												1	0
												0.135	0.865
												1	0
												1	0
												1	0
												1	0
												1	0
												1	0
												1	0
												0	1
												1	0
												1	0
												1	0
												0.152	0.848
												0	1
												0.704	0.296
												1	0
												1	0
												0.172	0.828
												1	0
												1	0
												0	1
												0.6	0.4
												0.444	0.556
												1	0
												1	0
												1	0
												1	0
												1	0
												0	1
												0.656	0.344
												1	0
												1	0
												1	0
												0.5	0.5
												0.24	0.76
												1	0
												1	0
												1	0
												0.829	0.171
												1	0
												1	0
												0.25	0.75
												1	0
												1	0
												0.133	0.867
												1	0
												1	0
												1	0
												1	0
												1	0
												1	0
												1	0
												0	1
												1	0
												1	0
												1	0
												1	0
												1	0
												0	1
												1	0
												1	0
												0	1
												1	0
												1	0
												1	0
												1	0
												1	0
												0.75	0.25
												1	0
												1	0
												1	0
												1	0
												0.75	0.25
												1	0
												1	0
												1	0
												0	1
												1	0
												1	0
												1	0
												1	0
												0	1
												0	1
												1	0
												1	0
												1	0
												1	0
												1	0
												0.5	0.5
												1	0
												1	0
												1	0
												1	0
												1	0
												1	0
												1	0
												1	0
												0.68	0.32
												0.47	0.529
												0	1
												1	0
												1	0
												1	0
												1	0
												1	0
												1	0
												1	0
												1	0
												1	0
												0	1
												1	0
												1	0
												1	0
												0.55	0.45
												1	0
												1	0
												0.531	0.468
												0	1
												1	0
												1	0
												0.777	0.223
												0.422	0.578
												0.717	0.283
												0.581	0.419
												1	0
												0.821	0.179
												1	0
												0.732	0.269
												0.747	0.253
												0.907	0.093
												1	0
												0.825	0.175
												1	0
												0.665	0.335
												1	0
												0.877	0.123
												0.514	0.486
												1	0
												1	0
												1	0
												0.205	0.795
												1	0
												1	0
												0	1
												1	0
												0.289	0.711
												0.604	0.395
												1	0
												0.204	0.796
												1	0
												1	0
												0	1
												0.507	0.493
												0	1
												1	0
												1	0
												1	0
												1	0
												1	0
												1	0
												0.911	0.089
												0.75	0.25
												1	0
												0.891	0.109
												0.481	0.519
												1	0
												1	0
												1	0
												1	0
												1	0
												1	0
												1	0
												1	0
												1	0
												1	0
												0.398	0.602
												1	0
												1	0
												1	0
												1	0
												1	0
												1	0
												1	0
												1	0
												1	0
												0.194	0.806
												0.496	0.504
												0.857	0.143
												0.724	0.276
												0.696	0.304
												1	0
												1	0
												1	0
												1	0
												1	0
												1	0
												1	0
												0.709	0.291
												0.8	0.2
												0.186	0.813
												0.186	0.814
												0.124	0.876
												1	0
												0.897	0.103
												1	0
												0	1
												1	0
												0.474	0.526
												0.19	0.81
												1	0
												1	0
												0.104	0.896
												0.087	0.913
												1	0
												0	1
												1	0
												0.812	0.189
												1	0
												1	0
												0.108	0.892
												0	1
												1	0
												1	0
												0.951	0.049
												1	0
												1	0
												1	0
												1	0
												1	0
												0.932	0.068
												0.488	0.512
												1	0
												1	0
												1	0
												0.175	0.825
												1	0
												1	0
												1	0
												1	0
												0.212	0.788
												0	1
												0.846	0.154
												1	0
												0.5	0.5
												1	0
												1	0
												1	0
												1	0
												1	0
												0.359	0.641
												1	0
												1	0
												0.637	0.363
												0.822	0.178
												1	0
												1	0
												0.958	0.041
												1	0
												1	0
												1	0
												0	1
												1	0
												0.583	0.417
												1	0
												1	0
												1	0
												1	0
												0	1
												1	0
												0.667	0.333
												1	0
												1	0
												0.411	0.588
												0.762	0.238
												1	0
												1	0
												1	0
												1	0
												0	1
												1	0
												0.123	0.877
												1	0
												1	0
												0	1
												0	1
												1	0
												1	0
												0	1
												0	1
												1	0
												1	0	1	0
												1	0	1	0
												1	0	1	0
												1	0	0.351	0.65
												0.283	0.717	0	1
												0.535	0.464	1	0
												0.167	0.833	0	1
												0.468	0.532	0	1
												0.839	0.161	0.524	0.476
												0.438	0.562	0.579	0.421
												0.094	0.906
												0.642	0.358	1	0
												0.583	0.417	1	0
												0.86	0.14	0.643	0.357
												1	0	1	0
												1	0	1	0
												0.25	0.75	0.732	0.268
												0.738	0.262	1	0
												1	0	1	0
												0.707	0.293	1	0
												1	0	1	0
												0.818	0.182	0.974	0.026
												1	0	1	0
												1	0	1	0
												0	1	0.557	0.443
												1	0	0.263	0.737
												0.829	0.171	0.396	0.604
												0.618	0.382	1	0
												0.591	0.41	0.8	0.2
												0.571	0.429	0.942	0.058
												0.761	0.239	1	0
												1	0	1	0
												1	0	1	0
												0.725	0.275	1	0
												1.001	0	0.831	0.169
												0.537	0.464	1	0
												0.403	0.597	1	0
												0.953	0.048	0.019	0.981
												1	0	1	0
												0.276	0.724	0.736	0.264
												1	0	0.21	0.79
												0.4	0.6	0.231	0.77
												0.218	0.782	0.603	0.397
												1	0	1	0
												1	0	1	0
												1	0	0.135	0.865
												1	0	0.047	0.953
												1	0	0.17	0.83
												0.376	0.624	0.758	0.242
												0.392	0.608	0.609	0.391
												1	0	1	0
												1	0	1	0
												1	0	0.229	0.771
												1	0	0.572	0.427
												1	0	0	1
												1	0	1	0
												1	0	1	0
												1	0	1	0
												1	0	0.091	0.909
												1	0	0	1
												1	0	0.711	0.289
												1	0	0	1
												1	0	1	0
												1	0	1	0
												0.466	0.534	1	0
												0.517	0.483	0.255	0.745
												1	0	0	1
												1	0	0.342	0.658
												1	0	1	0
												0.782	0.217	1	0
												1	0	1	0
												0	1
												1	0	1	0
												0.143	0.857	0.244	0.756
												1	0	1	0
												0.2	0.8	1	0
												1	0	0.788	0.213
												0	1	0.555	0.445
												1	0	1	0
												0	1	0.824	0.176
												1	0	1	0
												1	0	0.333	0.667
												1	0	1	0
												1	0	1	0
												1	0	0.765	0.236
												0.275	0.725	1	0
												1	0	0.824	0.176
												1	0	1	0
												0.139	0.861	0.21	0.79
												0	1	1	0
												1	0	0.743	0.257
												1	0	1	0
												1	0	1	0
												0.179	0.821	1	0
												1	0	1	0
												0	1	1	0
												0	1	1	0
												0.742	0.258	1	0
												1	0	1	0
												0.452	0.548	0.5	0.5
												1	0	0.471	0.529
												1	0	0.688	0.312
												1	0	1	0
												1	0	1	0
												0.326	0.673	1	0
												1	0	0	1
												1	0	1	0
												1	0	1	0
												1	0	0	1
												1	0	1	0
												0	1	1	0
												1	0
												1	0	0.077	0.923
												1	0	0	1
												0	1	0	1
														0	1
												0.144	0.855
												1	0	1	0
												0.684	0.315	0.975	0.025
												1	0	1	0
												0.06	0.94	0.542	0.458
												0.252	0.748	1	0
												0.081	0.918	1	0
												1	0	1	0
												1	0	1	0
												0.483	0.517	1	0
												1	0	0.812	0.188
												1	0	1	0
												1	0	1	0
												1	0	1	0
												1	0	1	0
												0.53	0.469	1	0
												1	0	1	0
												1	0	1	0
												1	0	1	0
												0.051	0.949	1	0
												1	0	0.551	0.449
												1	0	0.897	0.103
												1	0	1	0
												0.06	0.94	1	0
												0.549	0.452	1	0
												1	0	1	0
												1	0	1	0
												1	0	1	0
												1	0	0.94	0.06
												0.379	0.621	1	0
												0.55	0.45	1	0
												0.237	0.763	0.829	0.171
												0.6	0.4	1	0
												1	0	1	0
												1	0	1	0
												0.282	0.718	1	0
												1	0	1	0
												1	0	0.935	0.065
												1	0	0.83	0.17
												0.818	0.182	1	0
												0.205	0.795	0.049	0.951
												0.776	0.224	1	0
												1	0	1	0
												1	0	1	0
												1	0	1	0
												1	0	0.743	0.257
												1	0	1	0
												1	0	1	0
												0	1	1	0
												0	1	1	0
												1	0	1	0
												0.231	0.769	1	0
												0	1	0.544	0.456
												1	0	0.406	0.594
												1	0	1	0
												1	0	1	0
												1	0	0.04	0.96
												1	0	0.41	0.59
												1	0	1	0
												1	0	1	0
														1	0
												0.275	0.726	1	0
												0.892	0.108	1	0
												0.24	0.76	1	0
												0.63	0.37	1	0
												0.905	0.096	0.29	0.71
												1	0	0.913	0.087
												0.165	0.835	1	0
												0.079	0.921	0.076	0.924
												0.591	0.409	1	0
												0	1	0.077	0.923
												0	1	0.615	0.385
												1	0	1	0
												1	0	0	1
												1	0	1	0
												1	0	1	0
												0.194	0.806	1	0
												0.718	0.282	0	1
												1	0	0.353	0.647
												1	0	1	0
												0.149	0.851	0.952	0.049
												0.08	0.92	0.892	0.108
												1	0	1	0
												1	0	1	0
												0	1	1	0
												1	0	1	0
												0.149	0.851	0.44	0.56
												1	0	1	0
												1	0	0	1
												1	0	1	0
												0.586	0.414	0.077	0.923
												1	0	0.478	0.522
												1	0	1	0
												1	0	1	0
												0.065	0.935	1	0
												0.265	0.735	1	0
												0.735	0.265	1	0
												0.115	0.885	1	0
												0	1	1	0
												0	1	0	1
												0.053	0.947	0.053	0.947
												0	1	0.189	0.811
												1	0	0.778	0.222
														0	1
												1	0	1	0
												1	0	1	0
												1	0	1	0
												1	0	1	0
												1	0	1	0
												1	0	0.889	0.111
												1	0	1	0
												0.875	0.125	1	0
												0.861	0.139	1	0
												0.175	0.825	0.3	0.7
												1	0	0	1
												1	0	1	0
												0.886	0.114	1	0
												1	0	1	0
												1	0	0.68	0.32
												1	0	1	0
												0.404	0.596	1	0
												0.33	0.669	1	0
												1	0	1	0
												0.864	0.136	1.001	0
												1	0	1	0
												1	0	1	0
												1	0	1	0
												1	0	1	0
												1	0	1	0
												1	0	1	0
												1	0	1	0
												1	0	0.722	0.278
												0.346	0.654	1	0
												1	0	1	0
												1	0	1	0
												0.725	0.275	1	0
												1	0	1	0
												1	0	1	0
												1	0	1	0
												0.514	0.486	1	0
												0	1	1	0
												1	0	1	0
												1	0	1	0
												0.731	0.269	1	0
												1	0	0.238	0.762
												0.142	0.858	1	0
												1	0	1	0
												1	0	1	0
												0.417	0.583	1	0
												1	0	1	0
												1	0	1	0
												1	0	0.889	0.111
												1	0	0	1
												1	0
												1	0	0.155	0.845
												1	0	1	0
												0.898	0.102	1	0
												0.73	0.27	1	0
												1	0	0.625	0.375
												0.8	0.2	0.705	0.295
												1	0	0.884	0.115
												1	0	0.907	0.093
												1	0	0.8	0.2
												1	0	1	0
												0.943	0.057	1	0
												0.848	0.152	1	0
												0.085	0.915	0.769	0.231
												1	0	1	0
												1	0	1	0
												0.561	0.439	1	0
												1	0	1	0
												1	0	0	1
												0.426	0.574	1	0
												1	0	1	0
												1	0	0.768	0.231
												1	0	1	0
												1	0	1	0
												0.655	0.345	0.402	0.598
												1	0	0.853	0.147
												0.117	0.883	0.625	0.375
												1	0	0.741	0.259
												0	1	1	0
												0	1	0.358	0.642
												0.238	0.762	1	0
												1	0	0.552	0.448
												1	0	1	0
												1	0	1	0
												1	0	1	0
												1	0	1	0
												0.952	0.048	1	0
												0.628	0.373	1	0
												0.078	0.922	0.392	0.608
												1	0	1	0
												0.067	0.933	1	0
												1	0	0.647	0.353
												1	0	0	1
												1	0	0.076	0.924
												0.026	0.974	0.733	0.267
												1	0	1	0
												1	0	1	0
												1	0	0	1
												0.607	0.394	1	0
												0.145	0.855	0	1
												0.645	0.355	1	0
												1	0	0.2	0.8
												1	0	0.233	0.767
												1	0	1	0
												1	0	1	0
												1	0	0.667	0.333
												1	0	0	1
												1	0
												1	0	0.525	0.475
												1	0	0	1
												1	0	0.72	0.28
												0.567	0.433	0.157	0.843
												0.115	0.885	0.931	0.07
												0.783	0.217	0.23	0.771
												1	0	0.162	0.838
												0.484	0.516	1	0
												0.387	0.613	1	0
												0.765	0.235	0.569	0.431
												1	0	1	0
												1	0	1	0
												1	0	0.382	0.618
												0.674	0.327	1	0
												0.893	0.107	0	1
												1	0	0.333	0.667
												0.75	0.25
												1	0	1	0
												1	0	0.305	0.695
												1	0	0.796	0.204
												0.652	0.348	1	0
												1	0	1	0
												1	0	1	0
												1	0	1	0
												0	1	0.68	0.32
												1	0	0.377	0.623
												0.4	0.6	1	0
												0.75	0.25	1	0
												1	0	1	0
												1	0	0.892	0.108
												1	0	0.8	0.2
												0.029	0.971	1	0
												0	1	0.133	0.867
												0.819	0.182	1	0
												0.882	0.118	0.6	0.4
												1	0	1	0
												1	0	0.13	0.871
												1	0	1	0
												1	0	1	0
												1	0	1	0
												1	0	0.418	0.583
												1	0	0.496	0.504
												0.778	0.222	0.231	0.769
												1	0	1	0
												1	0	0.419	0.581
												1	0	0.021	0.979
												1	0	0.905	0.095
												0.757	0.243	1	0
												1	0	1	0
												1	0	0.316	0.684
												1	0	0.095	0.905
												1	0	0.184	0.816
												1	0	1	0
												1	0	1	0
												1	0	0.525	0.475
												0.075	0.925	0.615	0.385
												1	0	0.188	0.812
												1	0	1	0
												0.259	0.741	0.64	0.36
												0	1	1	0
												1	0	0	1
												1	0	0.1	0.9
												1	0	0.393	0.606
												1	0	1	0
												1	0	1	0
												1	0	1	0
												1	0	1	0
												1	0	1	0
												1	0	0.129	0.87
												1	0	1	0
												1	0	0.297	0.703
												0	1	1	0
												1	0	1	0
												1	0	1	0
												0.715	0.286	0.228	0.772
												1	0	1	0
												0	1	1	0
												1	0	1	0
												1	0	0.063	0.938
												1	0	0.694	0.306
												1	0	1	0
												1	0	1	0
												1	0	0	1
												1	0	0.526	0.474
												1	0	0.033	0.967
												1	0	1	0
												0.125	0.875	1	0
												1	0	0.567	0.432
												1	0	1	0
												1	0	0.36	0.64
												1	0	0.135	0.865
												1	0	1	0
												0.226	0.774	1	0
												0.917	0.083	1	0
												0	1	1	0
												1	0	1	0
												1	0	0.286	0.714
												1	0	0	1
												1	0	0.221	0.779
												1	0	0.683	0.317
												1	0	1	0
												1	0
												1	0
												1	0
												1	0
												1	0
												1	0
												1	0
												1	0
												1	0
												0.29	0.711
												1	0
												0.111	0.889
												1	0
												1	0
												1	0
												0.12	0.88
												0.349	0.651
												0.162	0.838
												1	0
												1	0
												1	0
												1	0
												1	0
												0.417	0.583
												0.358	0.642
												1	0
												1	0
												1	0
												1	0
												1	0
												1	0
												1	0
												0.167	0.833
												1	0
												1	0
												1	0
												1	0
												1	0
												1	0
												1	0
												0.13	0.87
												1	0
												1	0
												1	0
												1	0
												0.622	0.378
												0.706	0.294
												1	0
												0.102	0.898
												1	0
												1	0
												1	0
												1	0
												1	0
												0.643	0.357
												1	0
												0.093	0.907
												1	0
												0.806	0.194
												0	1
												0.064	0.936
												1	0
												1	0
												1	0
												1	0
												0.688	0.312
												1	0
												1	0
												1	0
												0	1
												1	0
												1	0
												1	0
												0.62	0.38
												1	0
												1	0
												1	0
												1	0
												0	1
												1	0
												1	0
												1	0
												1	0
												1	0
												0	1
												1	0
												1	0
												1	0
												1	0
												1	0
												0.082	0.918
												0.764	0.235
												0	1
												0.885	0.115
												0.97	0.03
												0.788	0.213
												1	0
												1	0
												1	0
												1	0
												1	0
												0.495	0.505
												0.701	0.299
												1	0
												0.443	0.557
												1	0
												0.827	0.173
												1	0
												0.821	0.179
												1	0
												1	0
												1	0
												1	0
												1	0
												1	0
												0.359	0.641
												0.517	0.483
												1	0
												0.036	0.964
												0.672	0.328
												1	0
												1	0
												0.812	0.188
												1	0
												0.675	0.325
												0.654	0.346
												0.693	0.308
												1	0
												1	0
												1	0
												1	0
												1	0
												0.844	0.156
												1	0
												0.195	0.806
												1	0
												1	0
												0.29	0.71
												1	0
												0.105	0.895
												0.214	0.786
												1	0
												1	0
												0.962	0.038
												1	0
												1	0
												1	0
												1	0
												1	0
												1	0
												1	0
												0.671	0.329
												1	0
												0.397	0.603
												1	0
												0.509	0.491
												1	0
												1	0
												0	1
												0.666	0.333
												0.773	0.227
												1	0
												0.455	0.545
												1	0
												1	0
												1	0
												1	0
												1	0
												0.93	0.07
												0.485	0.515
												1	0
												1	0
												0.404	0.596
												0.929	0.071
												1	0
												0.539	0.461
												1	0
												1	0
												0	1
												0.846	0.154
												1	0
												1	0
												0.343	0.656
												0.078	0.922
												1	0
												0.386	0.615
												0.352	0.648
												0.936	0.065
												1	0
												1	0
												0.882	0.118
												1	0
												1	0
												0.737	0.263
												0.585	0.416
												0.667	0.333
												0	1
												1	0
												1	0
												1	0
												1	0
												1	0
												0.662	0.337
												1	0
												1	0
												1	0
												1	0
												0	1
												0.834	0.167
												0.897	0.103
												0.559	0.441
												0.58	0.419
												0.401	0.6
												0.523	0.477
												1	0
												1	0
												0	1
												1	0
												0.306	0.694
												0	1
												1	0
												1	0
												1	0
												0.222	0.778
												1	0
												1	0
												1	0
												1	0
												1	0
												1	0
												1	0
												0.094	0.906
												0.667	0.333
												1	0
												0	1
												0.2	0.8
												1	0
												1	0
												1	0
												0	1
												0.5	0.5
												0.3	0.7
												0.333	0.667
												0.538	0.462
												0.714	0.286
												1	0
												1	0
												0.01	0.99
												0	1
												1	0
												0	1
												1	0
												1	0
												0.5	0.5
												0.886	0.114
												1	0
												0.868	0.132
												1	0
												0.887	0.112
												1	0
												1	0
												0.972	0.028
												0.605	0.395
												1	0
												1	0
												0.439	0.561
												0.315	0.685
												0.73	0.27
												0.383	0.617
												0.957	0.043
												1	0
												0.955	0.045
												0.84	0.16
												0.949	0.051
												1	0
												0.21	0.79
												1	0
												0.432	0.568
												0.622	0.378
												1	0
												1	0
												1	0
												1	0
												0.981	0.019
												1	0
												0.51	0.49
												1	0
												1	0
												0.253	0.747
												1	0
												1	0
												0.933	0.067
												0.192	0.808
												1	0
												1	0
												1	0
												1	0
												0.681	0.319
												0.864	0.137
												1	0
												0.049	0.951
												1	0
												1	0
												1	0
												1	0
												0.958	0.042
												0.984	0.016
												0.395	0.605
												1	0
												0.81	0.19
												0.936	0.065
												0.62	0.38
												1	0
												1	0
												0.716	0.284
												1	0
												0.675	0.326
												1	0
												1	0
												1	0
												0.961	0.039
												0.986	0.014
												0.966	0.034
												0.27	0.73
												1	0
												1	0
												0.259	0.741
												0.855	0.145
												1	0
												0.66	0.34
												0.163	0.838
												0.179	0.821
												1	0
												1	0
												1	0
												0.257	0.743
												1	0
												1	0
												1	0
												0.346	0.654
												0.306	0.694
												0.301	0.699
												1	0
												1	0
												1	0
												1	0
												1	0
												1	0
												0.984	0.016
												1	0
												0	1
												1	0
												0.711	0.289
												0.4	0.6
												0.05	0.95
												1	0
												0.138	0.862
												1	0
												1	0
												0.573	0.427
												1	0
												1	0
												0.833	0.167
												0.281	0.719
												1	0
												0.762	0.238
												0.266	0.734
												1	0
												1	0
												1	0
												1	0
												1	0
												1	0
												0.147	0.853
												0.702	0.298
												1	0
												1	0
												1	0
												0.84	0.16
												1	0
												0.111	0.889
												1	0
												1	0
												1	0
												1	0
												0	1
												1	0
												1	0
												0.208	0.792
												0.931	0.068
												1	0
												0.488	0.512
												1	0
												1	0
												1	0
												1	0
												0.826	0.174
												1	0
												0.913	0.087
												1	0
												1	0
												1	0
												1	0
												1	0
												1	0
												1	0
												1	0
												0.448	0.552
												0.235	0.765
												1	0
												1	0
												1	0
												1	0
												1	0
												1	0
												1	0
												1	0
												1	0
												1	0
												0.031	0.969
												0.689	0.311
												1	0
												0	1
												1	0
												1	0
												1	0
												1	0
												1	0
												1	0
												0	1
												0.883	0.118
												1	0
												0.574	0.426
												0.545	0.455
												1	0
												1	0
												1	0
												1	0
												1	0
												1	0
												1	0
												1	0
												1	0
												0.75	0.25
												0.592	0.408
												1	0
												1	0
												0.082	0.918
												0.348	0.652
												1	0
												0	1
												0	1
												1	0
												0	1
												0.6	0.4
												0.828	0.171
												0	1
												1	0
												1	0
												0.512	0.488
												1	0
												1	0
												1	0
												1	0
												0.333	0.667
												1	0
												1	0
												0.157	0.843
												1	0
												0.25	0.75
												0	1
												0	1
												0.217	0.783
												0	1
												1	0
												1	0
												1	0
												0	1
												1	0
												1	0
												1	0
												1	0
												1	0
												1	0
												1	0
												0.494	0.507
												1	0
												1	0
												0.173	0.827
												1	0
												0.23	0.77
												0.881	0.119
												1	0
												1	0
												0.85	0.15
												1	0
												0.773	0.227
												1	0
												1	0
												0.263	0.738
												1	0
												0.892	0.108
												0.971	0.029
												1	0
												1	0
												0.786	0.214
												1	0
												0.905	0.095
												0	1
												1	0
												1	0
												0.159	0.841
												1	0
												1	0
												1	0
												1	0
												1	0
												1	0
												1	0
												1	0
												1	0
												1	0
												1	0
												1	0
												0.852	0.148
												0.958	0.042
												1	0
												1	0
												1	0
												0.573	0.427
												1	0
												1	0
												1	0
												1	0
												0.319	0.681
												1	0
												1	0
												1	0
												1	0
												1	0
												1	0
												0.65	0.35
												1	0
												1	0
												0.375	0.625
												1	0
												0.973	0.028
												1	0
												0.682	0.318
												1	0
												0.81	0.19
												1	0
												1	0
												1	0
												1	0
												0.867	0.133
												1	0
												0.314	0.686
												1	0
												1	0
												1	0
												1	0
												0.711	0.289
												0.403	0.597
												1	0
												1	0
												1	0
												1	0
												1	0
												1	0
												0.286	0.714
												1	0
												1	0
												1	0
												1	0
												0.4	0.6
												1	0
												1	0
												1	0
												0.572	0.429
												0.327	0.673
												1	0
												1	0
												1	0
												1	0
												1	0
												1	0
												1	0
												1	0
												1	0
												0	1
												1	0
												1	0
												0	1
												1	0
												1	0
												1	0
												1	0
												1	0
												0.74	0.259
												1	0
												1	0
												0.058	0.942
												0.378	0.622
												1	0
												1	0
												0.6	0.4
												1	0
												1	0
												1	0
												0	1
												1	0
												0.625	0.375
												1	0
												1	0
												1	0
												1	0
												1	0
												1	0
												1	0
												1	0
												1	0
												1	0
												1	0
												1	0
												0	1
												1	0
												1	0
												1	0
												1	0
												1	0
												1	0
												0	1
												1	0
												1	0
												0.226	0.774
												0.615	0.386
												1	0
												1	0
												0.364	0.635
												0	1
												1	0
												1	0
												1	0
												1	0
												1	0
												0	1
												1	0
												1	0
												1	0
												1	0
												1	0
												1	0
												1	0
												1	0
												1	0
												1	0
												0	1
												1	0
												1	0
												1	0
												1	0
												1	0
												0.444	0.556
												0	1
												1	0
												1	0
												1	0
												1	0
												1	0
												1	0
												1	0
												1	0
												1	0
												1	0
												1	0
												1	0
												1	0
												1	0
												0	1
												0.364	0.636
												0.76	0.24
												1	0
												1	0
												1	0
												1	0
												1	0
												0	1
												0.76	0.24
												0.122	0.878
												0.4	0.6
												1	0
												1	0
												0.493	0.508
												0.153	0.847
												0.589	0.411
												0.086	0.914
												0.151	0.849
												1	0
												1	0
												0.772	0.228
												0.861	0.139
												0.233	0.767
												0.708	0.292
												0.342	0.657
												0.173	0.828
												0.311	0.69
												1	0
												1	0
												1	0
												0.06	0.94
												0.33	0.67
												0.55	0.45
												1	0
												1	0
												0.454	0.547
												1	0
												0.16	0.84
												1	0
												0.667	0.333
												0	1
												0.548	0.452
												0.308	0.692
												1	0
												1	0
												1	0
												0.499	0.502
												0.22	0.781
												0.135	0.865
												0.314	0.686
												0.775	0.225
												0.6	0.4
												1	0
												0.855	0.146
[truncated: 4,454 more rows]

## Sheet: Immuno
Fig 4D	WT, 45'	WT, 60'	WT, LTP, 45'	WT, LTP, 60'	D7, 45'	D7, 60'	D7, LTP, 45'	D7, LTP, 60'
	95.85	87.86	204.85	132.47	147.09	79.91	98.85	68.09
	141.51	126.67	214.92	193.09	137.11	70.16	140.24	114.88
	108.87	130.47	211.88	189.21	47.61	108.67	149.08	87.49
	83.97	100.12	113.31	138.35	75.09	56.93	112.63	42.49
	82.34	82.35	159.15	67.98	73.41	83.37	85.02	22.74
	105.1	113.63	169.67	121.05	126.73	67.77	55.09	69.7
	96.22	78.74	160.37	270.42	73.27	112.56	94.18	36
	111.86	42.49	82.57	76.51	158.61	70.53	56.59	74.26
	74.32	81.58	131.54	83.56	100.21	75.98	46.52	104.93
	130.68	31.44	294.99	115.16	86.78	20.37	37.72	47.81
	117.57	121.3	245.57	147.51	103.02	69.74	114.85	74.58
	105.42	174.7	220.86	121.3	94.08	43.77	104.56	101.88
	60.62	71.84	217.55	118.4	59.72	26.6	72.86	96.63
	112.95	162.02	140.15	141.86	75.54	38.51	165.32	48.79
	72.73	137.26	157.88	86.07	120.65			27.37
		52.84	157.34	87.07	127.09
		104.7
	95.85	87.86	204.85	132.47	147.09	79.91	98.85	68.09
	141.51	126.67	214.92	193.09	137.11	70.16	140.24	114.88
	108.87	130.47	211.88	189.21	47.61	108.67	149.08	87.49
	83.97	100.12	113.31	138.35	75.09	56.93	112.63	42.49
	82.34	82.35	159.15	67.98	73.41	83.37	85.02	22.74
	105.1	113.63	169.67	121.05	126.73	67.77	55.09	69.7
	96.22	78.74	160.37	270.42	73.27	112.56	94.18	36
	111.86	42.49	82.57	76.51	158.61	70.53	56.59	74.26
	74.32	81.58	131.54	83.56	100.21	75.98	46.52	104.93
	130.68	31.44	294.99	115.16	86.78	20.37	37.72	47.81
	117.57	121.3	245.57	147.51	103.02	69.74	114.85	74.58
	105.42	174.7	220.86	121.3	94.08	43.77	104.56	101.88
	60.62	71.84	217.55	118.4	59.72	26.6	72.86	96.63
	112.95	162.02	140.15	141.86	75.54	38.51	165.32	48.79
	72.73	137.26	157.88	86.07	120.65			27.37
		52.84	157.34	87.07	127.09
		104.7
	97.95	116.41	93.15	121.49	43.27	49.32	36.62	26.74
	60.28	99.48	145.45	115.89	50.66	21.96	38.87	97.09
	85.4	53.42	96.8	248.11	80.26	55.37	10.88	52.5
	99.85	102.06	86.96	87.11	18.99	44.61	54.88	25.23
	176.56	59.27	144.66	84.18	41.97	77.85	49.66	129.65
	71.29	114.99	93.9	150.3	126.59	37.67	19.43	8.51
	51.83	74.9	73.92	128.87	113.26	70.82	91.89	11.63
	151.86	71.68	122.15	123.8	116.57	74.97	18.47	57.2
	106.84	55.87	146.07	126.24	22.59	65.85	21.6	40.42
	86.39	66.67	116.36	132.55	27.7	46.21	144.32	13.2
	48.73	285.26	175.02	123.59	139.84	38.31	33.65	14.9
	163.03			147.38	55.3	52.04	72.38	11.51
				90.06	14.09		32.11	56.35
				121.1			52.85
	76.49	50.13	192.85	91.25	167.91	13.15	138.9	65.74
	116.47	62.71	213.26	81.15	177.59	77.61	179.93	15.05
	82.57	110.95	138.57	100.51	49.2	21.75	102.54	38.69
	44.6	135.27	167.62	176.21	31.06	26.72	64.36	38.27
	138.14	75.64	75.87	170.72	27.97	13.22	32.18	75.71
	150.56	97.57	214.63	121.72	116.83	17.24	53.2	26.5
	94.73	114.4	106.68	106.19	113.13	140.77	26.02	121.34
	122.92	120.08	72.56	177.53	88.58	28.83	86.35	76.8
	87.75	164.98	110.32	179.1	157.11	38.2	129.32	74.1
	106.07	124.7	246.48	74.3	28.04	77.26	95.35	13.6
	64.5	61.34			70.55	45.72	134.65	21.4
	91.03	103.79			80.34	47.02		21.88
	124.18	116.7			90.05	97.79
		61.74				156
