# Supplementary material for: Regulation of different phases of AMPA receptor intracellular transport by 4.1N and SAP97
Source: eLife journal article supplement (doi:10.7554/elife.85609), 2023-04-06
Supplement: fig4-figsupp1-data1 [file sup Fig4- source data.xlsx]

## Sheet: Feuil1
Sup Fig 3A	Ves number	WT pré		WT post	scr pre	scr post		Mean speed	IN, Scr	IN, ShSAP	OUT, Scr	OUT, ShSAP	IN, WT	IN, D7	OUT, WT	OUT, D7
		9.26759							1.68212	1.41005	1.79996	1.51915
		0.210745		13.5942					1.43379	1.454	1.87767	1.28911
		10.8912		11.6408					1.08562	1.13478	1.16083	1.34951
				22.1514					1.66769	0.816667	1.71333	0.395
				14.4175					1.27672	1.652	1.27306
									1.98953		2.07872
									1.32285		1.31621
									2.03056		2.07119
		12.1747		32.7393
		3.73767		7.61905					1.5496	1.389	1.82527	1.31737
		6.83214		16.3409					1.5435	1.29632	1.62089	1.39077
										1.54684		1.58943
				14.3925						1.1435		0.4355
				24.1161					1.49773	1.54027	1.74845	1.42215
				14.0489					2.07077	1.8819	2.37387	1.48986
				9.88003					1.34655	1.47617	1.79353	0.993125
									1.04016	1.31635	1.20244	1.35773
				21.7979					2.0609		1.76437
				31.3584					0.995133		0.941206
									1.05376		1.07778
					9.85898	8.1565			2.00801		1.93485
					6.58549	7.84108			1.08738		1.24932
						6.3675
						25.7824			2.61033	1.1876	2.46979	0.97925
						16.0445			2.48076	1.96241	2.13073	1.92674
						59.0321			1.39945	2.2475	1.30229	1.83152
						6.31057			2.18037	0.509	2.30755	0.696
						30.689			2.27908	2.10151	2.32435	2.3513
									1.76718	2.13242	1.74774	2.41749
						16.4147			1.78946	0.716364	1.83765	0.718818
						6.60116			1.25244	1.65084	1.05887	1.42133
						17.5502
						27.3134
						10.5529			1.66172		1.5152
						12.4691			2.09982		2.14835
						28.5037			1.55426		1.48686
						8.88174
						5.67085
						43.8157								0.714526		1.14859
						11.7901							1.16781	1.21124	1.09961	1.36783
														1.29085		1.2869
					12.5627	20.013							1.32265	1.18622	1.51055	1.4648
					2.62128	21.2794							1.54282	1.80794	1.4598	1.8923
						7.00607							1.27958	1.3471	2.51083	1.24487
						29.895								1.09675		1.27267
						22.6471								1.24742		1.34416
						18.1483
						27.6097
						5.38126
						17.4049
						33.5576
						10.2653
													1.26515	1.10471	0.896385	1.0112
													1.83911	0.424	1.60389	0.7045
														0.4415		0.5288
													1.61441	1.86932	1.32225	1.8455
													2.0518	0.51425	2.14746	0.5014
													1.68409	1.8156	1.63606	1.54393
														1.55661		1.00924
														0.738333		0.7238
														1.77072		1.66308
														0.803		2.872
														1.38183		1.0914
													1.89203	1.9066	1.57102	1.85702
													1.64059	2.29792	1.21407	2.31105
													1.48559	1.27506	1.62582	1.50421
														1.39277		2.0748
													2.24042	1.37818	2.35768	1.45756
													2.5318	1.3568	2.47183	1.55182
													1.80272	0.9801	1.85907	1.41703
														0.858643		1.28321
														1.78123		1.37357
													1.4814	1.89983	1.46491	1.85903
														1.59649		1.66543
													1.88777	1.27094	1.98421	1.37485
														1.21654		1.54573
													2.58265	1.68517	2.59733	1.6403
														2.18981		2.35878
														1.60576		1.48035
														1.62691		1.56705
