# Supplementary material for: Regulation of different phases of AMPA receptor intracellular transport by 4.1N and SAP97
Source: eLife journal article supplement (doi:10.7554/elife.85609), 2023-04-06
Supplement: fig5-data1 [file Figure 5.xlsx]

## Sheet: IT
Fig 5B	Ves number	scr	sh4.1N	wt	d4.1	Mean speed	scr, IN/OUT	sh4.1N, IN/OUT	WT, IN/OUT	D4.1, IN/OUT	Move/Pause	scr, IN/OUT	scr, PAUSE	sh4.1,IN/OUT	sh4.1, PAUSE	WT, IN/OUT	WT, PAUSE	D4.1, IN/OUT	D4.1, PAUSE
		52.3015	19.7438				1.9891	2.55913				0.316	0.685	0.723	0.276
		35.6863	19.4036				2.49901	0.923633				1	0	0.235	0.765
		28.6613	2.31259				1.64625	1.24971				1	0	0.512	0.488
		54.5206	9.94319				2.2263	1.33305				1	0	1	0
		6.46083	4.13651				1.99475	1.99356				0.955	0.045	1	0
			2.97212					1.73327				0.334	0.666	0.857	0.143
		35.0899	16.7434				1.92118	1.76966				0.217	0.783	0.361	0.64
		40.2227	1.89785				2.20648	1.41964				0.835	0.165	0.106	0.894
		24.1103	19.0069				2.58648	1.426				0.257	0.742	1	0
		41.1818	37.6576				2.09511	1.87722				0.447	0.553	0.698	0.302
			0.405346									1	0	1	0
			54.3793									1	0	1	0
							2.3323	2.30654				1	0	0.455	0.545
							2.04775	1.00328				1	0	1	0
		15.0307	1.66271				1.65839	1.42286				1	0	1	0
		29.7677	2.71295				2.17108	1.39663				0.398	0.602	1	0
			0.402365				1.65909	1.79791				0.694	0.306	0.769	0.231
		27.9683	2.41002					1.67275				1	0	0.386	0.615
		5.26268	2.03151				2.15715	1.78646				0.415	0.585	0.855	0.146
		11.1035	35.2072				2.27837	1.70991				1	0	1	0
		9.21291					2.4072	1.99				1	0	0.148	0.852
		38.2215					1.67373	2.30219				1	0	0.358	0.642
		9.23073										1	0	1	0
												1	0	0.871	0.13
		51.2324					1.28329	0.48125				1	0	1	0
		13.8387					1.68225	1.189				1	0	1	0
		6.96236						0.265				1	0	1	0
		9.85098						1.08778				1	0	1	0
		40.3369					1.12446	0.905				0.623	0.378	1	0
		42.1774					0.9684	1.94514				1	0	0.926	0.074
							1.17007					1	0	0.703	0.297
							1.56266					1	0	0.707	0.293
							1.54439					0	1	0.947	0.053
							1.20192					1	0	1	0
		48.9957	40.4661									0.2	0.8	0.23	0.769
		42.0397	21.7049				2.41398					1	0	0.697	0.303
		25.1879	8.87202				1.42253					0.353	0.647	0.481	0.519
		39.8951	35.2754				1.066					1	0	1	0
		25.303	8.46161				1.61827					0.359	0.641	1	0
		10.0729	13.3986				1.55404					1	0	1	0
		17.6774	44.1217				1.67444					0	1	1	0
		13.6408	4.21376									1	0	0.511	0.489
		17.6973					1.27947	0.459889				1	0	0.263	0.738
		31.3014					1.87535	1.3483				1	0	1	0
		15.672						1.286				1	0	0.057	0.943
								0.882273				0.805	0.194	1	0
							1.2346	1.36417				0.548	0.452	1	0
				6.71795	1.97366		1.29575	2.0999				0.572	0.429	1	0
				9.35402	0.431325		1.49826					0.865	0.135	1	0
					5.28872		1.47583					0.867	0.133	1	0
				6.18169	1.39709		1.60746					0.568	0.432	0.091	0.909
				26.4112	14.6691		1.175					1	0	0.355	0.645
				15.2231	15.9115							1	0	1	0
					10.0332		2.38226					0.673	0.327	1	0
					0.782562		1.03631					1	0	0.238	0.762
							1.06657					0.7	0.3	0.896	0.104
							1.66678					1	0	1	0
				6.46536	9.74695		1.58679					1	0	1	0
				49.2864	7.63013		1.77782					1	0	1	0
				6.89556	13.5463							1	0	0.565	0.435
				6.91006	24.606		1.9329	1.04223				0.6	0.4	0.21	0.789
					11.6505		1.48946	1.60351				1	0	1	0
					8.54429		1.93455	2.022				0.273	0.727	1	0
				34.5404	21.9384		1.77756	1.7283				0.547	0.454	0.195	0.805
					7.41717		1.51965	1.19412				0.871	0.129	0.32	0.68
				18.9869	15.9075		1.39346	1.48065				1	0	1	0
				9.55008	17.4816		1.67814	2.23292				1	0	1	0
				5.38224			1.40929	1.16967				1	0	1	0
				16.6862								1	0	0	1
				38.5325			1.42131					1	0	0.32	0.68
				6.46083			2.54266					1	0	0.387	0.613
				24.296			2.07307					0.099	0.901	1	0
												1	0	0.518	0.482
				16.6168	12.0761		2.03173	1.01476				1	0	0.19	0.81
				21.3858	22.3296		1.82608	1.98746				1	0	0.16	0.84
					1.69876		2.24645	2.44684				1	0	0.226	0.774
				45.5075	18.0432		1.92693	2.01886				0	1	1	0
				31.5997	2.80304		1.58713	1.82111				0.276	0.724	1	0
				25.0387	33.4907		0.838488	1.4413				1	0	1	0
				35.5328	12.4247		1.79234	2.09358				1	0	0.486	0.514
				7.52666	16.2276		1.14848	1.364				0.204	0.795	0.421	0.579
				22.144	0.718587							1	0	0.226	0.774
				12.3676	5.25713		1.68206					1	0	0.033	0.967
				10.8824	8.8721		2.27863					0.733	0.267	0.531	0.469
				33.1269	1.44917		1.84893					1	0	1	0
				43.0635	6.06907							0.4	0.6	1	0
				14.9167	2.59218							1	0	1	0
					13.9261							0.537	0.463	0	1
					6.98904				1.26515	0.986833		0.595	0.404	1	0
					9.36047				1.83911	1.074		1	0	1	0
					19.2623					1.86883		0.209	0.791	1	0
					18.0682				1.61441	0.685		0.581	0.419	0.562	0.438
					20.8127				2.0518	1.72515		1	0	0	1
					9.04304				1.68409	1.39602		1	0	1	0
					3.25621					1.32674		1	0
										1.034		1	0	0.054	0.946
												1	0	0.524	0.476
									0.896385	2.1289		1	0	0.676	0.324
									1.60389	1.44867		1	0	0.288	0.712
										2.04873		0.029	0.971	0.565	0.435
									1.32225	0.721		0.111	0.889	0.383	0.617
									2.14746	1.7204		1	0	0.75	0.25
									1.63606	1.4071		1	0	0.886	0.114
										1.69515		1	0	1	0
										0.7745		1	0	1	0
												1	0	0.521	0.479
									1.36676	1.68506		1	0	0.667	0.333
									1.90517	1.26617		1	0	0.595	0.404
									1.30787	1.5632		0.641	0.359	0.75	0.25
									1.51545	1.68982		0.106	0.894	0.333	0.667
									1.59326	1.80462		0.822	0.178	0.408	0.592
									1.37649	2.17906		1	0	1	0
									1.60777	1.63271		0.21	0.79	1	0
									1.90772	1.46528		1	0	1	0
									1.26047	1.81514		1	0	0.049	0.951
									1.69515	1.77936		0.817	0.183	0.303	0.697
									1.31315			0.775	0.225	1	0
									1.65059			0.595	0.405	0.636	0.364
												0.875	0.125	0.657	0.343
									1.33372	1.87718		1	0	0.889	0.111
									2.00366	1.81915		1	0	0.59	0.411
									1.20926	1.40716		0	1	0.824	0.176
									1.24046	2.12718		1	0	0.256	0.744
									1.80615	1.75291		1	0	0.143	0.857
									1.35342	1.76624		1	0	0.826	0.174
									1.48696	1.69857		1	0	0.827	0.172
									1.57505	1.35665		0.569	0.43	0	1
									1.31763	1.83136		1	0	1	0
									1.75873	1.88226		1	0	1	0
									1.18581			1	0	0.747	0.253
									1.54235			1	0	0.129	0.871
												1	0	0.083	0.917
									2.02079	2.40219		1	0	0.806	0.194
									1.67545	1.94343		1	0	0.364	0.636
										0.920333		0.421	0.579	0.14	0.86
									2.20728	1.44458		1	0	1	0
									2.28151	1.396		1	0	0.078	0.922
									1.98751	1.84801		1	0	0	1
									2.19529	1.51448		0.387	0.613	0.453	0.547
									1.9625	1.65515		1	0	0.387	0.612
									1.54927	0.537667		1	0	0.49	0.51
									1.3675	1.61587		0.231	0.769	1	0
									1.75902	1.50823		1	0	0.263	0.737
									1.7969	1.14675		1	0	1	0
									1.45994	0.868		1	0	0.226	0.774
									2.27245	1.6155		1	0	0.68	0.32
										1.41568		1	0	1	0
										1.23846		0.105	0.895	1	0
										1.23697		1	0	1	0
										1.41692		0.262	0.738	1	0
										1.49658		0.75	0.25	1	0
										1.48714		1	0	1	0
										1.48696		1	0	0.25	0.75
										1.28864		1	0	0	1
												1	0	1	0
									2.06679	2.64765		1	0	0	1
									1.65992	1.92274		1	0	1	0
										1.1605		0.458	0.542	1	0
									2.30805	1.52049		0	1	0	1
									2.20397	1.32775		1	0	1	0
									2.15002	1.8264		1	0	0	1
									2.06171	1.74029		1	0	1	0
									1.84374	1.472		0.143	0.857	1	0
									1.28854	0.676167		0.311	0.689	0.286	0.714
									1.60376	1.42183		0.333	0.667	1	0
									1.86845	1.48715		1	0	0	1
									1.73212	1.14533		0.325	0.675	0.191	0.809
									1.86476	1.10585		0	1	0.411	0.589
									2.13515	1.90522		1	0	1	0
										1.62688		0.692	0.308	1	0
										0.907091		1	0	1	0
										1.52596		1	0	0.536	0.464
										1.29882		1	0	0.334	0.667
										1.54441		0.583	0.417	0	1
										1.64242		1	0	1	0
										1.813		1	0	1	0
										1.20827		0.029	0.971	0.25	0.75
												0.081	0.919	0.464	0.536
												1	0	0.417	0.583
												1	0	1	0
												1	0	1	0
												0.786	0.214	0.211	0.789
												1	0	0	1
												1	0	0	1
												1	0	0	1
												1	0	0	1
												0.06	0.94	1	0
												1	0	0.119	0.881
												1	0	0	1
												1	0	1	0
												0	1	1	0
												0.596	0.403	0.127	0.872
												0.374	0.626	1	0
												0.515	0.485	0	1
												0	1	0.789	0.211
												1	0
												0.471	0.529	1	0
												0.345	0.655	1	0
												1	0	0.452	0.548
												0.184	0.816	0.453	0.547
												0.75	0.25	1	0
												1	0	0.742	0.258
												1	0	1	0
												1	0	1	0
												0.703	0.296	1	0
												1	0	1	0
												1	0	1	0
												1	0
												0.2	0.8	1	0
												1	0	0.911	0.089
												1	0	0.587	0.413
												1	0	1	0
												1	0	1	0
												0.059	0.941	1	0
												1	0	0.54	0.46
												0	1	1	0
												1	0	1	0
												0	1	0.791	0.208
												0.921	0.079	0.637	0.364
												0.27	0.73	1	0
												0.077	0.923	1	0
												1	0	0.711	0.289
												0.216	0.785	1	0
												0.305	0.695	1	0
												1	0	1	0
												1	0	1	0
												0.115	0.885	1	0
												0.24	0.76	0.5	0.5
												0.089	0.911	0	1
												0	1	0	1
												1	0	1	0
												1	0	0	1
												1	0	1	0
												1	0	1	0
												0.128	0.872	0.421	0.579
												1	0	1	0
												0.845	0.155	1	0
												0.273	0.727	0.476	0.524
												1	0	0	1
												1	0	0	1
												1	0	0.5	0.5
												1	0	0.615	0.385
												1	0	0.281	0.719
												1	0	0.094	0.906
												1	0	1	0
												0	1	0	1
												0.6	0.4
												0	1	0.243	0.757
												1	0	0.479	0.521
												1	0	0.126	0.874
												0.571	0.429	0.896	0.104
												1	0	1	0
												1	0	0.488	0.513
												1	0	1	0
												0	1	0.637	0.363
												1	0	1	0
												1	0	1	0
												1	0	1	0
												0	1	1	0
												1	0	0.321	0.679
												1	0	0.857	0.143
												0.083	0.917	1	0
												1	0	0.906	0.094
												0	1	0.544	0.456
												1	0	0.775	0.225
												1	0	0.792	0.208
												0	1	0.889	0.111
												0	1	1	0
												1	0	1	0
												1	0	0.5	0.5
												1	0	0.64	0.36
												1	0	0.09	0.91
												0	1	1	0
												1	0	1	0
												1	0	0	1
												1	0	1	0
												1	0	0.089	0.911
												0	1	1	0
												0.333	0.667	1	0
												0.385	0.615	1	0
														0.839	0.161
												0.895	0.105	1	0
												0.753	0.247	1	0
												1	0	1	0
												1	0	1	0
												0.916	0.083	1	0
												0.9	0.1	0.829	0.171
												1	0	1	0
												0.371	0.629	1	0
												0	1	0.271	0.729
												0.889	0.111	0	1
												1	0	1	0
												1	0	1	0
												0.629	0.371	1	0
												1	0	0	1
												0.443	0.558	0.187	0.814
												1	0	1	0
												1	0	0.096	0.904
												1	0	0	1
												1	0	1	0
												1	0	0.63	0.37
												0.415	0.586	0	1
												0.227	0.773	1	0
												0.338	0.663	1	0
												0	1	0	1
												0.655	0.345	1	0
												1	0	1	0
												1	0	0.074	0.925
												1	0	1	0
												1	0	0	1
												1	0	0	1
												1	0	1	0
												1	0	1	0
												0	1	1	0
												1	0	1	0
												1	0	0.152	0.848
												1	0	0	1
												0.144	0.857	0.226	0.774
												0.444	0.556	0.129	0.871
												0.692	0.308
												0.909	0.091	0.464	0.536
												0.05	0.95	0.806	0.194
												1	0	0.892	0.108
												1	0	1	0
												1	0	1	0
												1	0	1	0
												1	0	0.312	0.688
												0.667	0.333	0.541	0.459
												0.69	0.31	1	0
												0	1	1	0
												0.6	0.4	1	0
												0.533	0.467	0.5	0.5
												0.773	0.227	1	0
												1	0	0.377	0.623
												0.098	0.902	0.89	0.11
												1	0	1	0
												1	0	1	0
												1	0	1	0
												1	0	0.169	0.831
												1	0	1	0
												1	0	1	0
												1	0	0.077	0.923
												0	1	1	0
												0.19	0.81	0	1
												1	0	1	0
												1	0	1	0
												1	0	0.792	0.208
												0.171	0.829	1	0
												1	0	0.945	0.056
												1	0	1	0
												0.474	0.526	1	0
												0.5	0.5	0.834	0.167
												1	0	0.883	0.118
												1	0	1	0
												1	0	1	0
												1	0	0.106	0.894
												1	0	1	0
												1	0	1	0
												1	0	1	0
												0.857	0.143	1	0
												1	0	1	0
												1	0	0.705	0.295
												0.5	0.5	0.2	0.8
												0.606	0.394	0.722	0.278
												1	0	0.344	0.656
												0.4	0.6	1	0
												0.429	0.571	0.33	0.67
												1	0	0.422	0.578
												1	0	0.692	0.308
												0.615	0.385	1	0
												1	0	1	0
												1	0	1	0
												1	0	1	0
												1	0	1	0
												1	0	1	0
												1	0	1	0
												1	0	1	0
												1	0	0.099	0.901
												1	0	1	0
												1	0	1	0
												1	0	1	0
												1	0	1	0
												1	0	1	0
												1	0	1	0
												1	0	1	0
												0.24	0.759	0.525	0.475
												0.42	0.58	1	0
												1	0	1	0
												0.478	0.522	1	0
												1	0	1	0
												1	0	1	0
												1	0	1	0
												1	0	1	0
												1	0	0.345	0.655
												1	0	0.562	0.438
												1	0	1	0
												0	1	1	0
												1	0	0	1
												0.12	0.88	1	0
												0	1	1	0
												0	1	1	0
												1	0	1	0
												0	1	1	0
												1	0	1	0
														0.176	0.824
												0.327	0.673	0.26	0.74
												1	0	0.895	0.105
												0.511	0.489	0.916	0.084
												1	0	1	0
												1	0	0.556	0.444
												0.42	0.581	1	0
												1	0	0.768	0.232
												0.894	0.105	1	0
												0.896	0.104	1	0
												1	0	1	0
												0.912	0.088	1	0
												1	0	1	0
												1	0	1	0
												0.182	0.818	1	0
												0.602	0.398	0.056	0.944
												0.683	0.317	0.969	0.031
												0.3	0.7	1	0
												0.904	0.096	1	0
												1	0	1	0
												1	0	0.181	0.819
												1	0	0.679	0.321
												1	0	1	0
												1	0	1	0
												0.81	0.19	0.139	0.861
												1	0	1	0
												1	0	1	0
												0	1	1	0
												1	0	1	0
												0.644	0.356	1	0
												1	0	1	0
												1	0	0.245	0.755
												1	0	1	0
												1	0	1	0
												0.815	0.185	0.457	0.542
												1	0	0.417	0.583
												0.594	0.406	1	0
												0.179	0.821	0	1
												1	0	1	0
												0.291	0.709	1	0
												0.197	0.803	0.193	0.807
												1	0	1	0
												1	0	1	0
												1	0	0	1
												1	0	1	0
												1	0	0	1
												1	0	1	0
												1	0	1	0
												1	0	1	0
												0.927	0.073	0.884	0.116
												0.823	0.177	1	0
												0.5	0.5	1	0
												0.92	0.081	0.476	0.524
												1	0	1	0
												1	0	0.562	0.438
												0.594	0.407	0.21	0.79
												0.44	0.56	0.261	0.739
												0.716	0.284	1	0
												1	0	1	0
												1	0	1	0
												1	0	1	0
												1	0	0	1
												0.464	0.536	1	0
												1	0	0	1
												0	1	1	0
												0.122	0.878	0	1
												0.443	0.557	0.833	0.167
												1	0	0.647	0.353
												1	0	1	0
												1	0	1	0
												1	0	1	0
												1	0	1	0
												0.445	0.554	1	0
												1	0	0	1
												1	0	1	0
												1	0	1	0
												1	0	1	0
												1	0	1	0
												0.686	0.315	1	0
												1	0	0.366	0.634
												0.169	0.831	0.545	0.455
												0.053	0.947	0.091	0.909
												0	1	1	0
												1	0	0.207	0.793
												0.71	0.29	1	0
												0.545	0.455	0	1
												0	1	0	1
												1	0	1	0
												1	0	1	0
												0.066	0.934	1	0
												0	1	0	1
												1	0	1	0
												1	0	0.705	0.294
												1	0	0.37	0.63
												1	0	0.235	0.765
												1	0	1	0
												1	0	0.255	0.745
												1	0	1	0
												1	0	0.63	0.37
												1	0	0	1
												0.965	0.034	1	0
												1	0	1	0
												1	0	0	1
												1	0	0.12	0.88
												1	0	1	0
												1	0	1	0
												0.615	0.385	0.8	0.2
												1	0	0.461	0.538
												0.391	0.609	1	0
												1	0	1	0
												0.5	0.5	1	0
												1	0	1	0
												1	0	1	0
												1	0	1	0
												1	0	1	0
												1	0	1	0
												0.259	0.741	0.231	0.769
												1	0	1	0
												0	1	0.4	0.6
												1	0	1	0
												0.368	0.632	1	0
												0.5	0.5	1	0
												1	0	1	0
												1	0	0.5	0.5
												1	0	0.273	0.727
												0	1	1	0
												1	0	0	1
												1	0	1	0
												1	0	1	0
												1	0	1	0
												1	0	1	0
												1	0	0.666	0.333
												0.312	0.688	0	1
												0.858	0.143	0.077	0.923
												0	1	0	1
												0	1	1	0
												0.069	0.931	0	1
														1	0
												1	0	0.823	0.176
												1	0	0	1
												0.872	0.128	0	1
												0.84	0.16	1	0
												1	0	1	0
												0.787	0.213
												1	0	0.964	0.036
												0.894	0.106	0.856	0.144
												1	0	0.26	0.741
												1	0	1	0
												1	0	0.518	0.482
												0.726	0.274	0.132	0.867
												1	0	0.959	0.041
												1	0	1	0
												0.814	0.186	0.957	0.043
												1	0	0.963	0.037
												1	0	0.132	0.868
												1	0	1	0
												1	0	1	0
												1	0	1	0
												1	0	1	0
												0.631	0.368	0.77	0.23
												0.714	0.287	0.863	0.137
												1	0	0.918	0.082
												1	0	1	0
												1	0	1	0
												0.905	0.095	0.255	0.745
												1	0	1	0
												0.765	0.235	0.923	0.077
												1	0	1	0
												0.186	0.814	0.769	0.231
												0.87	0.13	1	0
												0.606	0.393	1	0
												0.967	0.033	1	0
												1	0	1	0
												1	0	0.278	0.722
												1	0	1	0
												1	0	1	0
												0.37	0.63	0.813	0.188
												1	0	0.924	0.076
												1	0	1	0
												1	0	1	0
												1	0	1	0
												0.808	0.193	1	0
												1	0	1	0
												1	0	1	0
												0.93	0.07	1	0
												1	0	0.562	0.438
												1	0	1	0
												1	0	1	0
												0.333	0.667	0.25	0.75
												1	0	0.778	0.222
												1	0	0.706	0.294
												0.3	0.7	1	0
												1	0	1	0
												0.232	0.768	0.667	0.333
												0	1	1	0
												1	0	1	0
												1	0	0.826	0.174
												1	0	0.243	0.757
												0	1	1	0
												1	0	1	0
												1	0	1	0
												1	0	0.234	0.766
												0.898	0.102	1	0
												1	0	1	0
												0.847	0.154	0.616	0.385
												1	0	1	0
												1	0	1	0
												0.6	0.4	0.4	0.6
												0.334	0.667	1	0
												0.574	0.426	1	0
												1	0	1	0
												1	0	0.92	0.08
												0.626	0.374	1	0
												0	1	1	0
												1	0	1	0
												0.828	0.172	1	0
												1	0	0	1
												1	0	1	0
												0.372	0.628	0.739	0.261
												0.882	0.118	1	0
												0.293	0.708	1	0
												1	0	0.4	0.6
												1	0	1	0
												1	0	0.469	0.531
												1	0	1	0
												1	0	0.615	0.385
												1	0	1	0
												1	0	0.901	0.099
												1	0	1	0
												1	0	1	0
												1	0	1	0
												1	0	1	0
												1	0	1	0
												0.86	0.14	1	0
												1	0	0.922	0.078
												1	0	0.858	0.143
												0.74	0.259	0.639	0.362
												1	0	1	0
												1	0	1	0
												0.429	0.571	1	0
												1	0	1	0
												1	0	0.89	0.11
												1	0	0.619	0.381
												1	0	1	0
												1	0	1	0
												1	0	1	0
												0.182	0.818	1	0
												0.592	0.408	0.415	0.585
												0.522	0.478	1	0
												0	1	0.421	0.579
												1	0	0.319	0.682
												1	0	0.25	0.75
												1	0	0.206	0.794
												0.924	0.076	0	1
												0.864	0.136	0.811	0.188
												1	0	0.691	0.309
												0.383	0.617	1	0
												0.219	0.782	0.898	0.102
												1	0	0.442	0.558
												1	0	1	0
												0.5	0.5	1	0
												1	0	0.696	0.304
												1	0	0.448	0.552
												1	0	1	0
												1	0	1	0
												1	0	1	0
												1	0	1	0
												0.7	0.3	0.5	0.5
												1	0	1	0
												1	0	0	1
												1	0	1	0
												1	0	1	0
												1	0	0.853	0.147
												0.25	0.75	1	0
												0.577	0.423	1	0
												0	1	1	0
												0.909	0.091	1	0
												1	0	0	1
												0.592	0.407	1	0
												1	0	1	0
												0	1	1	0
												1	0	1	0
												1	0	0	1
												1	0	1	0
												0.765	0.235	1	0
												0.09	0.91	1	0
												0.136	0.864	1	0
												1	0	0.5	0.5
												1	0	1	0
												1	0	1	0
												1	0	1	0
												1	0	0.222	0.778
												1	0	0.4	0.6
												1	0	1	0
												1	0	0.377	0.623
												0.259	0.741	0.321	0.678
												0.148	0.852	0.8	0.2
												0.129	0.871	1	0
												1	0	1	0
												0	1	1	0
												0.894	0.106	1	0
												1	0	1	0
												0	1	0.81	0.19
												1	0	1	0
												1	0	0.3	0.7
												1	0	1	0
												0.651	0.349	0	1
												0.638	0.362	0.417	0.583
												0.788	0.212	1	0
												1	0	1	0
												1	0	0	1
												1	0	1	0
												1	0	1	0
												1	0	1	0
												1	0	0.364	0.636
												0.583	0.417	1	0
												0	1	0.862	0.138
												1	0	1	0
												0	1	1	0
												1	0	1	0
												1	0	0	1
												1	0	0.749	0.25
												0	1	1	0
												1	0	0	1
												1	0	0.8	0.2
														0.75	0.25
												0.256	0.744	0.5	0.5
												0.065	0.935	1	0
												0.707	0.293	0.92	0.08
												0.212	0.787	0.6	0.4
												0.638	0.361	0	1
												1	0	1	0
												0.309	0.69	1	0
												0.75	0.25	1	0
												0.704	0.296	1	0
												1	0	1	0
												1	0	0.226	0.774
												0.052	0.948	1	0
												1	0	1	0
												1	0	0.482	0.517
												1	0	0.571	0.429
												0.4	0.6	1	0
												0	1	1	0
												1	0	0.333	0.667
												1	0	1	0
												0.012	0.988	1	0
												0.193	0.807	1	0
												1	0	1	0
														1	0
												1	0	1	0
												0.706	0.294	1	0
												0.963	0.037	1	0
												1	0	0	1
												0.962	0.038	0.346	0.654
												0.036	0.965
												1	0	1	0
												1	0	1	0
												0.492	0.508	1	0
												0.838	0.162	0.212	0.787
												0.835	0.165	0.837	0.163
												0.762	0.238	0.538	0.462
												0.646	0.354	1	0
												1	0	1	0
												1	0	1	0
												1	0	1	0
												1	0	0.916	0.084
												0.71	0.29	0.797	0.203
												0.572	0.429	1	0
												0.351	0.65	1	0
												1	0	0.327	0.674
												0.638	0.363	1	0
												0.143	0.857	1	0
												1	0	1	0
												0.936	0.064	1	0
												1	0	0.351	0.649
												0.292	0.708	0.458	0.542
												0.813	0.188	1	0
												0.706	0.294	1	0
												0.889	0.111	1	0
												0.722	0.278	0.902	0.097
												1	0	1	0
												0.96	0.04	1	0
												1	0	1	0
												1	0	1	0
												0.458	0.541	1	0
												0.569	0.431	0	1
												0.604	0.396	1	0
												0.711	0.289	1	0
												1	0	1	0
												0.967	0.033	1	0
												1	0	1	0
												0.956	0.044	1	0
												1	0	0.811	0.189
												1	0	1	0
												0.439	0.561	0.022	0.978
												1	0	0.106	0.894
												0.49	0.509	1	0
												1	0	0.35	0.649
												1	0	0	1
												0.308	0.693	1	0
												1	0	1	0
												0.492	0.507	1	0
												1	0	0.24	0.76
												1	0	1	0
												1	0	0	1
												1	0	1	0
												0.082	0.918	1	0
												1	0	1	0
												1	0	0	1
												1	0	0	1
												1	0	1	0
												1	0	1	0
												1	0	1	0
												0	1	1	0
												0.132	0.868	0.732	0.269
												1	0	1	0
												1	0	0.475	0.526
												0.312	0.689	1	0
												1	0	1	0
												0.706	0.294	1	0
												0.632	0.368	1	0
												1	0	1	0
												1	0	1	0
												0.12	0.88	1	0
												0.079	0.921	1	0
												0.088	0.912	1	0
												0.143	0.857	1	0
												1	0	1	0
												0.695	0.305	1	0
												1	0	1	0
												1	0	1	0
												1	0	0.889	0.111
												1	0	0.331	0.669
												1	0	1	0
												1	0	1	0
												1	0	1	0
												1	0	1	0
												0.269	0.731	1	0
												0.353	0.647	1	0
												1	0	1	0
												0.119	0.881	1	0
												0	1	0.393	0.607
												0	1	0.737	0.263
												0.281	0.719	0.895	0.105
												1	0	1	0
												1	0	1	0
												1	0	0.325	0.675
												0.63	0.37	1	0
												0	1	1	0
												0.93	0.07	1	0
												1	0	1	0
												0.438	0.562	1	0
												1	0	1	0
												0.289	0.711	1	0
												1	0	0.75	0.25
												0.174	0.826	0.902	0.098
												1	0	1	0
												1	0	0.448	0.552
												1	0	1	0
												0.55	0.45	1	0
												0	1	1	0
												1	0	1	0
												0.25	0.75	1	0
												1	0	0.494	0.507
												0	1	1	0
												0	1	1	0
												1	0	1	0
												1	0	1	0
												0	1	0.666	0.333
												1	0	0	1
												1	0	1	0
												1	0	1	0
												1	0	1	0
												1	0	0.864	0.136
												1	0	0.269	0.731
												1	0	1	0
												1	0	0.954	0.045
												0.619	0.381	0.62	0.379
												0	1	1	0
												0.219	0.781	1	0
												1	0	1	0
												1	0	1	0
												0.132	0.868	0.235	0.765
												1	0	0	1
												1	0	0.299	0.701
												1	0	1	0
												0.146	0.854	1	0
												1	0	1	0
												0	1	1	0
														1	0
												1	0	0.652	0.348
												1	0	0.449	0.551
												1	0	0	1
												1	0	1	0
												1	0	1	0
												1	0	1	0
												0.326	0.674	1	0
												1	0	1	0
												1	0	0.915	0.085
												0.297	0.703	1	0
												1	0	1	0
												1	0	1	0
												0.102	0.898	1	0
												0.952	0.048	0.666	0.333
												1	0	0.778	0.222
												0.944	0.056	1	0
												1	0	0.351	0.649
												1	0	0.886	0.115
												1	0	1	0
												1	0	0	1
												0.164	0.836	1	0
												1	0	1	0
												0.953	0.047	1	0
												1	0	0.957	0.043
												1	0	1	0
												1	0	1	0
												0.861	0.139	1	0
												0.867	0.133	1	0
												1	0	1	0
												1	0	1	0
												1	0	0	1
												1	0	1	0
												1	0	1	0
												1	0	1	0
												1	0	0.485	0.515
												1	0	1	0
												1	0	1	0
												0.158	0.842	1	0
												1	0	1	0
												1	0	1	0
												1	0	0	1
												0.772	0.228	1	0
												1	0	1	0
												0.271	0.729	0.176	0.824
												1	0	1	0
												1	0	1	0
												1	0	1	0
												1	0	1	0
												1	0	0.461	0.538
												1	0	1	0
												1	0	1	0
												0.881	0.119	1	0
												1	0	1	0
												1	0	1	0
												1	0	1	0
												1	0	0.228	0.771
												1	0	0.064	0.936
												1	0	1	0
												1	0	1	0
												1	0	0.5	0.5
												1	0	0.6	0.4
												1	0	0	1
												1	0	1	0
												1	0	1	0
												1	0	0	1
												1	0	1	0
												1	0	1	0
												1	0	1	0
												0.833	0.167	1	0
												1	0	0.647	0.353
												1	0	0.769	0.231
												1	0	1	0
												1	0	1	0
												1	0	1	0
												1	0	0.445	0.556
												1	0	1	0
												0.608	0.393	1	0
												1	0	1	0
												0.303	0.698	1	0
												0	1	0.09	0.91
												1	0	1	0
												1	0	0	1
												1	0	0.175	0.825
												1	0	1	0
												0.526	0.474	1	0
												1	0	1	0
												0	1	1	0
												1	0	0.636	0.364
												1	0	1	0
												0.5	0.5	1	0
												1	0	1	0
												1	0	1	0
												1	0	1	0
												1	0	1	0
												1	0	0.609	0.391
												1	0	1	0
												0.714	0.286	1	0
												0.467	0.533	1	0
												0.737	0.263	1	0
												1	0	0	1
												0.368	0.632	0.45	0.55
												1	0	1	0
												1	0	1	0
												0.643	0.357	1	0
												0.082	0.918	1	0
												1	0	0.391	0.609
												1	0	1	0
												0.469	0.531	1	0
												1	0	0.571	0.429
												0.176	0.824	1	0
												0.054	0.945	1	0
												0	1
												0.921	0.079	0.014	0.986
												0.835	0.165	0.135	0.865
												1	0	0.022	0.978
												1	0
												1	0	0.256	0.744
												1	0	1	0
												1	0	1	0
												1	0	0.401	0.599
												1	0	0.506	0.495
												0.8	0.2	1	0
												1	0	1	0
												1	0	0.228	0.772
												1	0	1	0
												1	0	0.759	0.241
												1	0	1	0
												1	0	0.637	0.364
												1	0	1	0
												1	0	0.877	0.123
												1	0	1	0
												0.244	0.756	1	0
												1	0	1	0
												1	0	1	0
												1	0	1	0
												1	0	0.93	0.069
												1	0	1	0
												1	0	0.429	0.571
												1	0	1	0
												1	0	0.048	0.952
												0	1	0.218	0.782
												0.297	0.703	0.273	0.727
												1	0	1	0
												1	0	0.462	0.538
												1	0	1	0
												1	0	0.946	0.055
												0.286	0.714	0.452	0.548
												1	0	1	0
												0	1	1	0
												1	0	1	0
												0.514	0.486	1	0
												1	0	1	0
												1	0	1	0
												0.482	0.517	1	0
												1	0	1	0
												1	0	1	0
												0	1	0.195	0.805
												1	0	1	0
												1	0	1	0
												0	1	0.089	0.911
												1	0	0.162	0.838
												1	0	1	0
												1	0	1	0
												1	0	1	0
												1	0	0.796	0.204
												0.358	0.642	1	0
												1	0	1	0
												1	0	1	0
												1	0	1	0
												1	0	0.286	0.714
												1	0	0	1
												1	0	1	0
												1	0	1	0
												1	0	0.583	0.417
												1	0	0.174	0.826
												0.133	0.867	1	0
												1	0	1	0
												0.568	0.431	1	0
												1	0	0.115	0.885
												0.137	0.863	1	0
												1	0	1	0
												1	0	1	0
												1	0	1	0
												0.765	0.235	1	0
												1	0	0.784	0.216
												1	0	1	0
												1	0	1	0
												1	0	1	0
												1	0	0	1
												1	0	1	0
												1	0	0.835	0.165
												0.348	0.653	1	0
												0.54	0.46	0.64	0.36
												1	0	1	0
												1	0	1	0
												0.407	0.593	1	0
												0.667	0.333	1	0
												1	0	0.885	0.115
												1	0	0.571	0.429
												1	0	1	0
												1	0	0.476	0.524
												1	0	0	1
												1	0	1	0
												1	0	0.693	0.308
												1	0	0.785	0.214
												1	0	0.219	0.781
												1	0	0.647	0.353
												1	0	1	0
												1	0	1	0
												1	0	1	0
												1	0	1	0
												0.636	0.364	1	0
												1	0	1	0
												1	0	0.217	0.783
												0.171	0.829	1	0
												0	1	1	0
												1	0	1	0
												1	0	1	0
												0.273	0.727	1	0
												1	0	0.61	0.39
												0	1	1	0
												1	0	0.75	0.25
												1	0	1	0
												0	1	0.387	0.613
												1	0	1	0
												0.508	0.492	0.105	0.895
												1	0	1	0
												1	0	1	0
												1	0	1	0
												1	0	0.914	0.086
												1	0	1	0
												1	0	0.42	0.58
												1	0	1	0
												1	0	1	0
												1	0	1	0
												1	0	1	0
												0.052	0.948	0.397	0.603
												0.233	0.767	1	0
												1	0	1	0
												1	0	1	0
												1	0	1	0
												1	0	1	0
												1	0	0.723	0.277
												1	0	1	0
												1	0	0.714	0.286
												1	0	1	0
												0.562	0.438	0	1
												1	0	1	0
												1	0	1	0
												0.179	0.821	1	0
												0.179	0.821	1	0
												1	0	1	0
												1	0	1	0
												1	0	1	0
												1	0	1	0
												1	0	1	0
												0	1	1	0
												0	1	1	0
												0	1	1	0
												0	1	1	0
												1	0	1	0
												0	1	1	0
												0	1	1	0
												0.45	0.55	1	0
												0.846	0.154	1	0
												1	0	1	0
												1	0	1	0
												1	0	1	0
												1	0	0.546	0.455
												1	0	1	0
												0.364	0.636	1	0
												0.263	0.737	1	0
												1	0	1	0
												1	0	1	0
												1	0	0	1
												1	0	0	1
												1	0	0	1
												1	0	1	0
												0	1	0.333	0.667
												0	1	0.48	0.52
												0.488	0.512	1	0
												1	0	1	0
												0.162	0.838	0	1
												1	0	0	1
												0	1	1	0
												1	0	0.4	0.6
												1	0	1	0
												1	0	0.271	0.73
												1	0	1	0
												1	0	0	1
												0	1	1	0
												1	0	0.666	0.333
												0.286	0.714	1	0
												1	0	1	0
												1	0	0.292	0.708
												1	0	1	0
												1	0	0.183	0.817
												1	0	0.091	0.909
												1	0	1	0
												1	0	0	1
												1	0	1	0
														0.36	0.64
												0.297	0.703	1	0
												1	0	0.333	0.667
												1	0	1	0
												1	0	1	0
												1	0	1	0
												1	0	1	0
												0.395	0.604	1	0
												0.396	0.604	0	1
												0.792	0.208	0	1
												1	0	1	0
												0.05	0.95	1	0
												1	0	1	0
												0.051	0.949	0.229	0.771
												1	0	1	0
												1	0	0.087	0.913
												1	0	0	1
												1	0	1	0
												1	0	1	0
												1	0	0.29	0.71
												0.753	0.247	0.149	0.851
												1	0	0	1
												1	0	0	1
												1	0	1	0
												1	0	1	0
												1	0	1	0
												1	0	0	1
												1	0	1	0
												0.409	0.591	1	0
												1	0	1	0
												1	0	0	1
												1	0	1	0
												0.31	0.69	1	0
												1	0	1	0
												1	0	1	0
												1	0	0.217	0.783
												1	0	0.576	0.424
												1	0	0.45	0.55
												1	0	1	0
												1	0	1	0
												1	0	1	0
												1	0	1	0
												1	0	1	0
												0	1	1	0
												1	0	0	1
												1	0	0	1
												1	0	0.039	0.961
												1	0	1	0
												1	0	1	0
												1	0	1	0
												1	0	1	0
												0.245	0.755	1	0
												1	0	1	0
												1	0	1	0
												1	0	0.091	0.909
												0.667	0.333	1	0
												0.22	0.78	1	0
												1	0	1	0
												1	0	1	0
												1	0	1	0
												1	0
												1	0
												1	0
												1	0
												1	0
												0.625	0.375
												1	0
												1	0
												0.26	0.74
												0	1
												1	0
												0.562	0.438
												1	0
												1	0
												1	0
												1	0
												1	0
												1	0
												1	0
												1	0
												1	0
												1	0
												1	0
												1	0
												1	0
												1	0
												1	0
												1	0
												1	0
												1	0
												0.529	0.471
												0	1
												1	0
												0.546	0.455
												1	0
												1	0
												1	0
												1	0
												1	0
												0.206	0.794
												1	0
												1	0
												0.239	0.761
												1	0
												1	0
												0.286	0.714
												0.077	0.923
												1	0
												0.02	0.98
												0	1
												0.099	0.901
												1	0
												1	0
												1	0
												0.472	0.528
												1	0
												0.125	0.875
												1	0
												1	0
												1	0
												1	0
												1	0
												1	0
												1	0
												1	0
												1	0
												1	0
												1	0
												1	0
												1	0
												1	0
												1	0
												0.6	0.4
												1	0
												0.621	0.378
												1	0
												1	0
												1	0
												1	0
												1	0
												1	0
												1	0
												1	0
												1	0
												1	0
												0.861	0.139
												0.804	0.196
												1	0
												1	0
												1	0
												1	0
												0.897	0.103
												0.889	0.111
												1	0
												0.394	0.606
												1	0
												0.119	0.881
												1	0
												0.531	0.469
												0.859	0.141
												1	0
												1	0
												0.375	0.625
												1	0
												1	0
												1	0
												1	0
												1	0
												1	0
												1	0
												1	0
												1	0
												1	0
												1	0
												1	0
												1	0
												0.438	0.562
												1	0
												1	0
												1	0
												1	0
												0.31	0.69
												0.2	0.8
												0	1
												1	0
												1	0
												1	0
												1	0
												1	0
												1	0
												1	0
												1	0
												1	0
												1	0
												1	0
												1	0
												1	0
												1	0
												1	0
												1	0
												1	0
												0.143	0.857
												1	0
												1	0
												1	0
												1	0
												1	0
												0.666	0.333
												0.21	0.79
												1	0
												0	1
												0.785	0.215
												1	0
												1	0
												1	0
												1	0
												1	0
												1	0
												0.721	0.278
												0	1
												1	0
												0.579	0.421
												1	0
												1	0
												0	1
												1	0
												1	0
												1	0
												1	0
												1	0
												0.431	0.569
												1	0
												0	1
												1	0
												1	0
												1	0
												0.591	0.409
												1	0
												1	0
												1	0
												1	0
												1	0
												0	1
												0.4	0.6
												1	0
												1	0
												1	0
												0.85	0.15
												1	0
												1	0
												0.625	0.375
												1	0
												1	0
												1	0
												0.414	0.586
												1	0
												1	0
												0.666	0.333
												1	0
												1	0
												1	0
												0.228	0.772
												0.507	0.493
												1	0
												1	0
												1	0
												1	0
												1	0
												0.164	0.836
												1	0
												1	0
												0.58	0.419
												1	0
												1	0
												0.273	0.727
												1	0
												0	1
												0	1
												1	0
												0.257	0.743
												1	0
												1	0
												0	1
												0	1
												0.349	0.651
												1	0
												0.553	0.446
												0.639	0.361
												1	0
												1	0
												0.064	0.936
												1	0
												1	0
												1	0
												1	0
												0.113	0.887
												0.8	0.2
												1	0
												1	0
												1	0
												1	0
												1	0
												1	0
												0	1
												1	0
												1	0
												0.129	0.871
												0.2	0.8
												1	0
												1	0
												0.812	0.188
												0.538	0.462
												1	0
												1	0
												1	0
												0	1
												1	0
												1	0
												1	0
												1	0
												1	0
												1	0
												1	0
												1	0
												1	0
												1	0
												1	0
												1	0
												1	0
												1	0
												0.42	0.581
												1	0
												1	0
												1	0
												1	0	0.197	0.803
												1	0	0.663	0.337
												1	0	0.16	0.84
												1	0	0.69	0.31
												1	0	0.261	0.739
												0.644	0.356	0	1
												1	0	0.224	0.776
												1	0	0.791	0.209
												1	0	0.7	0.3
												1	0	1	0
												1	0	1	0
												1	0
												1	0	0.393	0.607
												1	0	0.84	0.16
												0.575	0.425	1	0
												1	0	0.959	0.041
												0.415	0.584	0.664	0.336
												0.689	0.311	0.289	0.711
												0.837	0.163	0.577	0.423
												0.425	0.575	1	0
												0.135	0.865	0.439	0.561
												1	0	0	1
												0.041	0.959	0.435	0.565
												1	0	1	0
												1	0	0.816	0.184
												0.189	0.81	0.321	0.679
												1	0	0.869	0.13
												0.203	0.797	1	0
												0.61	0.39	1	0
												1	0	1	0
												0.511	0.49	0	1
												0.75	0.25	1	0
												0.389	0.611	0.154	0.846
												1	0	0	1
												1	0	1	0
												0	1	0	1
												0.384	0.616	1	0
												0.461	0.539	1	0
												0.591	0.409	0	1
												1	0	0	1
												0.186	0.814	1	0
												1	0
												1	0	0.076	0.923
												0.582	0.418	0	1
												0.723	0.278
												1	0	0.896	0.104
												1	0	0.194	0.806
												0.438	0.562	0.783	0.217
												0.55	0.45	0.67	0.33
												0	1	0.693	0.307
												0.375	0.625	1	0
												0.742	0.258	0.417	0.583
												1	0	0.09	0.91
												0.143	0.857	0.062	0.937
												1	0	0.133	0.867
												0	1	0.081	0.919
												0	1	1	0
												0	1	0.338	0.662
												0.223	0.777	0.366	0.634
												0	1
												1	0	0.402	0.598
												0.625	0.375	1	0
												1	0	0.692	0.308
														0.286	0.714
												0.848	0.152	0	1
												1	0	0.786	0.214
												0.897	0.103	1	0
												1	0	0.312	0.688
												1	0	0	1
												1	0
												1	0	0.938	0.062
												1	0	0.692	0.308
												1	0	0.816	0.185
												0.964	0.035	0.641	0.359
												0.355	0.645	1	0
												1	0	0.907	0.093
												1	0	1	0
												0.783	0.216	1	0
												1	0	0.445	0.556
												0.629	0.37	1	0
												1	0	0.8	0.2
												1	0	1	0
												0.144	0.856	1	0
												1	0	0.491	0.509
												1	0	0.95	0.05
												1	0	0.818	0.183
												0.92	0.08	1	0
												1	0	1	0
												1	0	0.545	0.455
												1	0	1	0
												0.844	0.156	0.604	0.396
												1	0	1	0
												0.889	0.111	1	0
												1	0	0.954	0.046
												1	0	0.122	0.878
												1	0	1	0
												0.662	0.338	1	0
												0.909	0.091	0	1
												0.9	0.1	0.888	0.111
												1	0	1	0
												0.797	0.203	1	0
												1	0	0.543	0.457
												0.696	0.304	0	1
												0.711	0.289	0.785	0.215
												0.031	0.969	1	0
												1	0	1	0
												1	0	1	0
												1	0	1	0
												0.778	0.222	0.815	0.185
												0.21	0.79	1	0
												1	0	1	0
												1	0	0.029	0.971
												0.71	0.291	1	0
												0.24	0.76	0.423	0.577
												1	0	1	0
												0.152	0.848	0.686	0.314
												0.588	0.412	1	0
												1	0	1	0
												1	0	1	0
												1	0	0.294	0.706
												0.258	0.742	1	0
												0.541	0.459	1	0
												0.231	0.769	1	0
												0	1	0.707	0.293
												1	0	0.03	0.97
												1	0	1	0
												1	0	0	1
												0.632	0.368	0.833	0.167
												1	0	0.479	0.52
												0	1	1	0
												1	0	1	0
												1	0	1	0
												0.273	0.727	1	0
												0.381	0.619	1	0
												0	1	1	0
												0.833	0.167	0.079	0.921
												0.062	0.938	1	0
												1	0	1	0
												1	0	0.909	0.091
												1	0	1	0
												1	0	0.462	0.538
												1	0	1	0
												1	0	1	0
												0.846	0.154	1	0
												0.176	0.824	0.583	0.417
												0.88	0.12	1	0
												1	0	0	1
												1	0	0.813	0.188
												0.385	0.615	1	0
												1	0	1	0
												1	0	1	0
												1	0	1	0
												1	0	1	0
												0.7	0.3	1	0
												1	0	1	0
												0.555	0.444	1	0
												0	1	1	0
												0.379	0.621	1	0
												0	1	1	0
												1	0	1	0
												0.349	0.651	1	0
												0	1	0.297	0.703
												1	0	0	1
												1	0	0.492	0.508
												1	0	1	0
												0.39	0.61	0	1
												0.211	0.789	0	1
												0	1	0.4	0.6
												1	0	1	0
												0.714	0.286	0.816	0.184
												1	0	1	0
												1	0	1	0
												1	0	0	1
												1	0	0.276	0.724
												0.654	0.346	1	0
												1	0	1	0
												1	0	0.104	0.896
														1	0
												0.185	0.815	1	0
												0.231	0.77	0.318	0.682
												1	0	0.5	0.5
												0.892	0.108	1	0
												1	0	0.124	0.877
												0.203	0.797	1	0
												0.358	0.642
												1	0
												1	0
												0.594	0.406
												1	0
												0.69	0.31
												0.619	0.381
												0.792	0.208
												1	0
												0.764	0.235
												0.943	0.057
												0.413	0.586
												0.571	0.43
												0.626	0.374
												0.032	0.968
												0	1
												0.857	0.143
												0	1
												0.083	0.917
												1	0
												1	0
												0.697	0.303
												0.527	0.473
												0.529	0.471
												1	0
												1	0
												0.931	0.069
												1	0
												0.857	0.143
												0.321	0.679
												0.561	0.439
												0.439	0.561
												0.649	0.351
												0.81	0.19
												0	1
												0.898	0.102
												1	0
												1	0
												1	0
												0.648	0.352
												0.923	0.077
												0.717	0.283
												0.913	0.087
												0.452	0.548
												0.518	0.481
												1	0
												1	0
												0.619	0.381
												1	0
												0.729	0.271
												0	1
												0.307	0.694
												0	1
												1	0
												1	0
												1	0
												0.101	0.899
												0.158	0.842
												0.146	0.854
												1	0
												0.645	0.355
												1	0
												1	0
												0	1
												1	0
												0.682	0.318
												0	1
												1	0
												1	0
												0.25	0.75
												0.521	0.479
												0.476	0.524
												1	0
												0.848	0.153
												0.774	0.226
												0.437	0.562
												0.058	0.942
												1	0
												0	1
												0.393	0.607
												1	0
												1	0
												1	0
												0	1
												1	0
												1	0
												1	0
												1	0
												1	0
												0.85	0.15
												0.328	0.672
												1	0
												1	0
												1	0
												1	0
												1	0
												1	0
												0	1
												1	0
												0.483	0.517
												0.188	0.811
												0	1
												0.108	0.892
												1	0
												0.609	0.391
												0.263	0.737
												1	0
												0	1
												0.818	0.183
												0.413	0.587
												0.882	0.118
												1	0
												1	0
												0.177	0.823
												0.607	0.393
												1	0
												1	0
												1	0
												1	0
												1	0
												0.398	0.602
												1	0
												1	0
												1	0
												0	1
												0	1
												0.298	0.702
												1	0
												0.146	0.854
												0.206	0.794
												0.671	0.329
												1	0
												0.465	0.534
												0.603	0.397
												1	0
												0.698	0.302
												1	0
												0.6	0.4
												1	0
												1	0
												1	0
												1	0
												0.787	0.213
												0.138	0.862
												1	0
												0.191	0.808
												0.064	0.937
												1	0
												0.551	0.45
												0.687	0.313
												0.975	0.025
												0.134	0.866
												0.44	0.56
												1	0
												1	0
												0.872	0.128
												0.5	0.5
												1	0
												1	0
												0.942	0.058
												1	0
												0.076	0.924
												1	0
												1	0
												1	0
												1	0
												1	0
												0.579	0.421
												0	1
												0	1
												0.297	0.703
												1	0
												0	1
												1	0
												1	0
												0.109	0.891
												1	0
												1	0
												1	0
												1	0
												0	1
												0.186	0.814
												1	0
												1	0
												1	0
												0	1
												1	0
												0.333	0.667
												1	0
												1	0
												1	0
												1	0
												1	0
												1	0
												1	0
												0.375	0.625
												1	0
												1	0
												0.804	0.196
												1	0
												0.932	0.068
												0.664	0.336
												0.221	0.779
												0.441	0.559
												1	0
												0.926	0.074
												0.452	0.548
												0.673	0.327
												1	0
												1	0
												0.17	0.83
												1	0
												0.44	0.56
												0.911	0.089
												1	0
												0.261	0.739
												0.06	0.94
												0.354	0.646
												1	0
												0.892	0.108
												1	0
												0.755	0.245
												0	1
												0.129	0.871
												0.238	0.762
												1	0
												0.675	0.324
												1	0
												0.83	0.17
												1	0
												1	0
												0.913	0.087
												0.25	0.75
												1	0
												0.04	0.96
												1	0
												1	0
												1	0
												1	0
												0.113	0.887
												1	0
												1	0
												0.278	0.722
												0	1
												0	1
												1	0
												1	0
												1	0
												0	1
												1	0
												1	0
												1	0
												0.5	0.5
												0.792	0.208
												1	0
												0	1
												0.474	0.526
												1	0
												1	0
												0.871	0.129
												1	0
												1	0
												1	0
												0.509	0.49
												1	0
												1	0
												1	0
												1	0
												1	0
												0.408	0.592
												1	0
												0	1
												0.937	0.062
												0.761	0.239
												1	0
												0.459	0.541
												0.786	0.214
												1	0
												1	0
												0.57	0.43
												0.717	0.283
												1	0
												0.248	0.753
												1	0
												1	0
												1	0
[truncated: 6,725 more rows]

## Sheet: Immuno
Fig 5C	WT, 45'	WT, 60'	WT, LTP, 45'	WT, LTP, 60'	D4.1, 45'	D4.1, 60'	D4.1, LTP, 45'	D4.1, LTP, 60'
	59.1	63.25	106.74	139.28	68.54	20.25	98.05	25.42
	40.09	142.67	96.84	170.63	28.38	54.96	35.06	18.46
	80.03	81.95	125.56	65.24	78.9	106.62	63.97	87.39
	62.27	161.7	145.78	292.8	51.65	51.86	22.41	102.15
	74.21	46.76	109.43	176.29	48.82	66.71	39.75	33.28
	77.35	90.8	140.83	110.98	20.44	99.71	12.17	50.02
	66.35	111.34	208.65	138.7	65.86	21.87	65.63	91.51
	141.05	135.55	105.99	146.87	17.23	49.85	62.12	97.96
	131.98	93.95	131.42	112.62	16.17	47.14	22.6	162.45
	103.95	79.48	160.17	110.62	16.17	18.43	12.47	19.25
	165.61	78.2	107.65		89.44	90.54	15.87	25.18
	91.52	97.17			56.94	63.62	41.15	15.05
	206.5	117.17			25.01	89.98	71	42.09
					9.75		15.95	38.39
					39.3			47.39
					48.97
	125.53	144.13	65.12	116.17	35.33	19.63	78.92	30.07
	99.92	56.58	80.53	92.2	73.38	46.01	63.13	16.86
	91.12	37.96	220.54	111.64	28.38	27.44	34.02	6.59
	38.15	63.06	139.33	162.77	44.52	25.25	56.08	96.62
	83.15	44.54	70.71	127.84	69.98	16.12	32.95	66.84
	109.05	128.97	123.15	146.8	55.55	15.25	42.72	25.6
	110.37	101.92	182.39	75.84	32.03	22.17	93.55	27.49
	25.27	90.48	204.55	207.11	48.11	36.36	155.27	18.55
	180.88	141.14	80.19	91.87	43.74	46.21	57.2	45.06
	169.17	64.63	266.02	73.5	65.7	72.67	100.45	39.31
	65.41	178.02	175.44	89.14	46.22	28.77	77.22	26.36
	113.57	93.26	96.71	201.67	30.76	64.76	106.48	18.01
	110.95	155.31	126.74	126.71		41.54		20.07
	77.46		187.2			64.56		73.61
			175.97			36.66		19
	59.4	158.84	104.59	115.4	39.57	17.26	149.6	127.17
	107.53	190.83	144.98	111	55.5	56.42	108.64	50.06
	90.11	65.66	157.93	228.9	57.9	32.55	23.68	23.34
	90.3	52.74	148.15	133.59	120.33	38.73	47.03	40.82
	146.9	114.34	125.68	95.21	61.47	42.03	61.76	19.16
	39.85	90.69	162.93	88.63	55.26	36.42	53.57	48.68
	86.78	48.18	116.63	121.39	41.25	50.18	86.69	31.36
	33.16	62.63	174.63	112.19	32.01	39.32	28.64	37.54
	197.44	130.75	214.34	105.57	75.91	55.17	39.08	40.01
	123.61	48.31	113.4	133.25	33.69	27.74	32.06	23.94
	66.52	60.82	153.83	195.2	50.3	27.8	62.67	53.99
	98.58	47.25	160.19	140.05	51.45	150.57	41.35	31.86
	67.77	177.1	224.74	221.35	84.04	71.21	27.97	35.48
	106.18	183.28	37.16	136.43	56.41	35.01	29.51	51.12
	69.55	49.77	157.44	117.12	91.5	31.92	33.16	14.11
	161.87	123.02	80.48	150.38	95.88	33.64	113.45	69.5
	153.64	64.1	150.85	167.8	41.11	31.02	59.11	37.2
	100.79	92.81	145.17		45.63	51.74	91.41	48.87
		138.9			43.13	77.27	70.8	36.79
