# Supplementary material for: Regulation of different phases of AMPA receptor intracellular transport by 4.1N and SAP97
Source: eLife journal article supplement (doi:10.7554/elife.85609), 2023-04-06
Supplement: fig6-data1 [file Figure 6.xlsx]

## Sheet: IT
Fig 6A	Ves number	WT pré	WT post
		4.34161	21.0636
		7.74415	21.1295
			12.1817
		3.0558	24.2176
		1.74932	8.42299
			20.0486
			14.3199
			6.81112
		5.50908	20.635
		10.5005	10.7364
		14.4829	12.5175
			22.2468
			6.50772
			5.15446
			6.74938
			26.385
			24.264
			13.8616
			24.8166
			8.13963
			15.8997
			13.4177
Fig 6C	Ves number	WT	AA	Mean speed	WT IN/OUT	AA IN/OUT	Move/Pause	Wt move	WT PAUSE	AA Move	AA PAUSE
		21.0636			1.66306			0.921	0.079	1	0
		21.1295	3.12603		1.73505	1.28417		0.177	0.823	0.135	0.865
			1.54756			0.499		0.391	0.609	1	0
			0.915132			0.9515		1	0	0	1
								1	0	0.262	0.738
					1.13214	0.9126		1	0	0.909	0.091
		12.1817	2.95981		1.64291	1.33382		1	0	1	0
		24.2176	15.815		1.33684	1.1625		0.389	0.611	0	1
		8.42299	1.11394		2.0478	1.30875		0.33	0.67	0.141	0.859
		20.0486	2.21869		1.60402	1.66697		1	0	0	1
		14.3199	26.6578			0.487667		1	0	0.753	0.247
			2.3346			1.17265		1	0	0.287	0.713
			25.5966		1.4366	0.700267		0.692	0.308	1	0
		6.81112	6.33859			0.595		1	0	0	1
			0.186176			0.584667		1	0	0	1
			3.63965					1	0	0	1
								1	0
					1.25087	1.38975		0.667	0.333	0.771	0.229
		20.635	4.20803		1.01591	1.00325		1	0	0.14	0.86
		10.7364	4.03972		1.34975	0.887		0.949	0.051	0.073	0.927
		12.5175	8.03334		0.811	0.5915		0.829	0.171	0	1
			0.847772		1.56469	0.931		0.951	0.049	0	1
		22.2468	4.11056		0.745286	0.679		1	0
		6.50772	0.729214		3.23633	0.22		1	0	0.229	0.771
		5.15446	1.01585		0.689278	0.283		0.931	0.069	0.247	0.753
		6.74938	0.339126		1.60878	0.587		1	0
		26.385	0.136799		0.945922	1.2684		0	1
		24.264	5.70313		1.63597	0.76425		1	0
		13.8616	1.55644		1.39957	0.849769		0.31	0.69
		24.8166	6.21781			1.04		1	0
			0.530944		1.22922			1	0
		8.13963			1.06383			1	0
		15.8997			1.10473			0.108	0.892
		13.4177						0.115	0.885
								1	0
								0	1
								1	0
								1	0
								0.929	0.071
					1.86158	1.22311		0.679	0.32
					1.94781	0.679		0.567	0.433
						0.5775		1	0
								0.444	0.556
								1	0
						1.1216		1	0
					1.18071	1.52606		1	0
					1.71108	1.536		1	0
					1.68244	1.13814		0.715	0.286
					2.00767	1.6486		1	0
					1.7773	0.659875		1	0
						1.34073		1	0
						0.732125		0.678	0.321
					1.54614			1	0
						1.16486		0.15	0.85
								1	0
						1.1092		0.061	0.939
					1.27998	1.28879		1	0
					1.23542	1.175		0.881	0.119
					1.64839	0.763333		0.577	0.423
					0.992231	0.9388		0.128	0.872
					1.65578	0.683		0.912	0.088
					0.980231	0.769667		0.156	0.844
					0.518286	0.279		0.806	0.194
					0.825211	0.587		1	0
					1.70425	1.23895		1	0
					1.02062	0.456		1	0
					0.991655	1.02252		0	1
					1.53019	0.2605		1	0
								1	0
					1.34992			1	0
					1.25536			0	1
					1.23381			1	0
								1	0
								0	1
								0.083	0.917
								1	0
								1	0
								1	0
								1	0
								0.143	0.857
								1	0
								0	1
								0.263	0.737
								0	1
								1	0
								0.59	0.41
								0	1
								1	0
								1	0
								1	0
								0.956	0.043
								0.966	0.034
								0.41	0.59
								1	0
								1	0
								0.976	0.024
								0.301	0.699
								0.315	0.684
								0.308	0.692
								0.793	0.207
								0.779	0.221
								1	0
								1	0
								0.341	0.659
								1	0
								1	0
								1	0
								0.199	0.801
								1	0
								1	0
								1	0
								1	0
								1	0
								0.925	0.075
								1	0
								1	0
								1	0
								0.666	0.333
								1	0
								0.122	0.878
								1	0
								1	0
								0.239	0.761
								1	0
								1	0
								1	0
								1	0
								1	0
								1	0
								1	0
								1	0
								1	0
								1	0
								1	0
								0.755	0.245
								1	0
								1	0
								1	0
								0.316	0.684
								0	1
								1	0
								0.729	0.271
								0.085	0.915
								1	0
								1	0
								1	0
								1	0
								1	0
								1	0
								1	0
								0	1
								0.846	0.154
								0	1
								0.12	0.88
								1	0
								0.14	0.86
								0	1
								0	1
								1	0
								1	0
								1	0
								0	1
								0.889	0.111
								1	0
								1	0
								1	0
								0.128	0.872
								0.14	0.86
								1	0
								0	1
								1	0
								0.091	0.909
								0	1
								0.159	0.841
								0.731	0.269
								1	0
								1	0
								0.135	0.865
								0	1
								0	1
								1	0
								1	0
								0	1
								0	1
								0	1
								0	1
								0.526	0.474
								1	0
								1	0
								1	0
								1	0
								0.477	0.523
								0.784	0.215
								1	0
								1	0
								0.518	0.482
								0.897	0.103
								0.119	0.881
								0.638	0.362
								0.759	0.241
								0.967	0.033
								0.678	0.322
								0.112	0.888
								0.472	0.528
								0.427	0.573
								0.292	0.708
								0	1
								0.088	0.912
								0.188	0.812
								0.625	0.375
								0.385	0.615
								1	0
								0.333	0.667
								1	0
								0.044	0.956
								1	0
								0	1
								0.177	0.823
								0	1
								1	0
								0.793	0.208
								0.293	0.707
								1	0
								0.145	0.855
								1	0
								1	0
								1	0
								0	1
								1	0
								1	0
								0	1
								0	1
								0	1
								1	0
								1	0
								0.529	0.471
								1	0
								0.263	0.737
								0	1
								1	0
								1	0
								0.095	0.905
								0.616	0.384
								1	0
								1	0
								1	0
								1	0
								1	0
								0.966	0.034
								0.044	0.956
								0	1
								1	0
								0.801	0.199
								1	0
								0.805	0.195
								0.098	0.902
								1	0
								1	0
								1	0
								1	0
								0.914	0.086
								1	0
								0.056	0.944
								1	0
								1	0
								1	0
								0.947	0.053
								0.463	0.537
								1	0
								0.7	0.3
								1	0
								1	0
								1	0
								1	0
								1	0
								1	0
								1	0
								1	0
								0.821	0.179
								1	0
								0.417	0.583
								1	0
								1	0
								0.692	0.308
								0.875	0.125
								0.369	0.631
								0.95	0.05
								1	0
								1	0
								1	0
								1	0
								1	0
								0.25	0.75
								0.733	0.267
								1	0
								1	0
								1	0
								1	0
								1	0
								1	0
								0	1
								1	0
								1	0
								1	0
								0.14	0.86
								0	1
								1	0
								1	0
								0.693	0.308
								0.455	0.545
								1	0
								0.25	0.75
								0.556	0.444
								1	0
								1	0
								0.824	0.176
								0	1
								1	0
								0.929	0.071
								1	0
								0	1
								0	1
								1	0
								1	0
								0.684	0.316
								0	1
								1	0
								1	0
								1	0
								0	1
								1	0
								0.364	0.636
								0.059	0.941
								0.375	0.625
								0.485	0.515
								1	0
								0.353	0.647
								1	0
								1	0
								1	0
								0.958	0.042
								0.535	0.464
								1	0
								0.837	0.163
								0	1
								1	0
								0.652	0.348
								1	0
								0.76	0.239
								1	0
								0.722	0.278
								1	0
								0	1
								1	0
								0.043	0.957
								0	1
								1	0
								0.512	0.488
								0	1
								0	1
								1	0
								1	0
								0.452	0.548
								0.769	0.231
								1	0
								0.01	0.99
								0.312	0.687
								1	0
								1	0
								1	0
								1	0
								0	1
								1	0
								0.91	0.09
								1	0
								0.19	0.811
								0.444	0.556
								1	0
								1	0
								1	0
								1	0
								0.667	0.333
								0.387	0.613
								0.6	0.4
								1	0
								0	1
								1	0
								0	1
								0.046	0.954
								0	1
								0.375	0.625
								0	1
								1	0
								1	0
								0.462	0.538
								0	1
								0	1
								0.042	0.958
								0.18	0.82
								1	0
								1	0
								1	0
								1	0
								1	0
								0.192	0.808
								1	0
								1	0
								1	0
								1	0
								1	0
								1	0
								0.694	0.306
								1	0
								1	0
								0.133	0.867
								1	0
								0.225	0.775
								0.172	0.828
								1	0
								1	0
								0.64	0.359
								1	0
								1	0
								0.241	0.759
								0.356	0.643
								1	0
								1	0
								1	0
								0	1
								0.951	0.05
								0.584	0.416
								1	0
								0.857	0.143
								1	0
								1	0
								1	0
								0.089	0.911
								0.412	0.588
								1	0
								0.169	0.831
								0.94	0.06
								0.857	0.143
								1	0
								0.07	0.93
								0.808	0.192
								1	0
								1	0
								0.175	0.825
								1	0
								1	0
								0.167	0.833
								1	0
								1	0
								1	0
								1	0
								1	0
								1	0
								1	0
								1	0
								0.511	0.489
								0.704	0.296
								1	0
								1	0
								1	0
								1	0
								1	0
								0.655	0.345
								1	0
								0.278	0.722
								1	0
								1	0
								1	0
								0.107	0.893
								0.379	0.621
								1	0
								0.07	0.931
								1	0
								1	0
								1	0
								0	1
								0.682	0.318
								0	1
								0.217	0.783
								0.269	0.731
								0	1
								1	0
								1	0
								1	0
								0.625	0.375
								1	0
								0.355	0.645
								1	0
								1	0
								1	0
								1	0
								1	0
								1	0
								0.444	0.556
								1	0
								1	0
								0.486	0.514
								1	0
								0	1
								1	0
								1	0
								1	0
								1	0
								0	1
								0	1
								0.196	0.804
								1	0
								0.755	0.246
								1	0
								1	0
								0	1
								0.267	0.733
								1	0
								0	1
								1	0
								1	0
								1	0
								1	0
								1	0
								1	0
								1	0
								0.792	0.208
								1	0
								0.889	0.111
								1	0
								0.923	0.077
								1	0
								0.818	0.182
								0.936	0.065
								1	0
								1	0
								1	0
								1	0
								1	0
								0.812	0.188
								0.75	0.25
								1	0
								0.953	0.047
								0.565	0.435
								1	0
								0.752	0.248
								1	0
								1	0
								0.098	0.902
								1	0
								1	0
								1	0
								1	0
								1	0
								1	0
								0.246	0.754
								1	0
								1	0
								1	0
								1	0
								0.55	0.45
								1	0
								1	0
								1	0
								1	0
								1	0
								1	0
								0.852	0.148
								1	0
								0.942	0.058
								0	1
								0.919	0.081
								0.786	0.214
								1	0
								1	0
								1	0
								1	0
								0.275	0.725
								1	0
								1	0
								0.949	0.051
								0	1
								0.167	0.833
								1	0
								1	0
								1	0
								1	0
								1	0
								1	0
								1	0
								1	0
								0.867	0.133
								0	1
								0.02	0.98
								1	0
								0.834	0.167
								0.559	0.441
								0.642	0.358
								1	0
								1	0
								1	0
								0	1
								1	0
								1	0
								1	0
								1	0
								0	1
								0.221	0.78
								0	1
								0	1
								0.378	0.622
								0	1
								1	0
								1	0
								1	0
								0	1
								0.72	0.28
								0.444	0.556
								0	1
								1	0
								1	0
								1	0
								0.231	0.769
								0.9	0.1
								0.158	0.842
								0	1
								0.696	0.304
								1	0
								0	1
								0	1
								0	1
								1	0
								1	0
								0	1
								1	0
								1	0
								1	0
								0	1
								0.312	0.688	1	0
								1	0	1	0
								0.57	0.43	0.545	0.456
								1	0	0.313	0.687
								0.458	0.542	0.93	0.07
								1	0	0.246	0.753
								1	0	0.076	0.923
								0.595	0.405	1	0
								1	0	1	0
								0.72	0.28	1	0
								0.536	0.464	0.199	0.801
								0.066	0.934	1	0
								1	0	0.048	0.952
								0.915	0.085	0	1
								0.234	0.766	1	0
								0.849	0.152
								0.351	0.649	0.307	0.694
								1	0	0.946	0.054
								1	0	1	0
								1	0	0.872	0.128
								1	0	0.204	0.796
								1	0	0.381	0.619
								1	0	0.582	0.418
								1	0	0.923	0.078
								0.292	0.708	0.855	0.145
								0	1	1	0
										1	0
										0.598	0.402
										0.567	0.433
										0.96	0.04
										1	0
										0.9	0.1
										1	0
										0.964	0.036
										0	1
										0.961	0.039
										1	0
										1	0
										1	0
										0.736	0.265
										1	0
										0.563	0.437
										0.252	0.748
										0.244	0.756
										0.505	0.495
										1	0
										1	0
										1	0
										1	0
										0.261	0.738
										0.309	0.691
										0	1
										1	0
										1	0
										0.058	0.942
										1	0
										1	0
										1	0
										0.706	0.294
										0	1
										1	0
										1	0
										1	0
										0	1
										1	0
										1	0
										0	1
										0.308	0.692
										0	1
										1	0
										0.625	0.375
										1	0
										0	1
										0.625	0.375
										0.667	0.333
										1	0
										1	0
										1	0
										0.435	0.566
										0.94	0.06
										1	0
										1	0
										0.619	0.381
										0.371	0.629
										1	0
										0.248	0.752
										0.41	0.59
										0.495	0.505
										0.115	0.885
										0	1
										0	1
										0.164	0.836
										0.178	0.822
										1	0
										1	0
										0.109	0.891
										0.293	0.707
										1	0
										1	0
										0.939	0.061
										1	0
										0.133	0.867
										0.074	0.926
										1	0
										1	0
										1	0
										0.235	0.766
										1	0
										1	0
										0.173	0.828
										1	0
										0.868	0.132
										1	0
										1	0
										0.733	0.268
										0.224	0.776
										1	0
										0.866	0.133
										1	0
										1	0
										0.775	0.225
										1	0
										0	1
										1	0
										0.842	0.158
										0.609	0.391
										0	1
										1	0
										1	0
										1	0
										0.841	0.159
										1	0
										1	0
										1	0
										1	0
										1	0
										1	0
										0	1
										0.5	0.5
										0.629	0.371
										1	0
										0.734	0.267
										1	0
										0.852	0.148
										0.875	0.125
										0.66	0.34
										0.854	0.146
										0.905	0.095
										1	0
										1	0
										1	0
										0.883	0.118
										0	1
										1	0
										0.222	0.778
										0.411	0.588
										1	0
										0.894	0.106
										1	0
										1	0
										1	0
										1	0
										0.06	0.94
										0.095	0.905
										1	0
										1	0
										1	0
										0	1
										0	1
										0.026	0.974
										1	0
										0	1
										0	1
										0	1
										0	1
										1	0
										0.524	0.476
										1	0
										0.091	0.909
										1	0
										0.273	0.727
										1	0
										1	0
										1	0
										1	0
										0.6	0.4
										0.5	0.5
										1	0
										0.233	0.767
										1	0
										0.6	0.4
										1	0
										0.25	0.75
										0.25	0.75
										1	0
										0.765	0.235
										1	0
										0.766	0.233
										0.037	0.963
										1	0
										1	0
										1	0
										1	0
										1	0
										1	0
										0.235	0.765
										1	0
										0	1
										0.478	0.522
										1	0
										1	0
										1	0
										1	0
										1	0
										1	0
										1	0
										1	0
										1	0
										1	0
										0.555	0.444
										1	0
										0.87	0.13
										1	0
										1	0
										1	0
										0.833	0.167
										0	1
										1	0
										1	0
										1	0
										1	0
										0	1
										0.148	0.852
										1	0
										1	0
										0.064	0.936
										0	1
										1	0
										1	0
										1	0
										0.615	0.385
										0.462	0.538
										0.565	0.435
										0.463	0.538
										0	1
										0.379	0.621
										0.514	0.486
										1	0
										0.369	0.63
										1	0
										1	0
										0.379	0.621
										1	0
										0.251	0.749
										0.349	0.651
										0.184	0.816
										1	0
										1	0
										1	0
										1	0
										1	0
										1	0
										0.833	0.167
										0.044	0.956
										0.864	0.136
										1	0
										0.841	0.159
										1	0
										1	0
										0	1
										1	0
										1	0
										0.265	0.735
										1	0
										0.816	0.184
										1	0
										1	0
										1	0
										1	0
										1	0
										1	0
										1	0
										1	0
										1	0
										1	0
										1	0
										1	0
										1	0
										1	0
										1	0
										0	1
										1	0
										0.865	0.135
										1	0
										1	0
										1	0
										1	0
										0.6	0.4
										0	1
										0.147	0.853
										1	0
										0.526	0.474
										0.722	0.278
										0.2	0.8
										1	0
										1	0
										1	0
										1	0
										1	0
										1	0
										1	0
										1	0
										0.755	0.245
										1	0
										0.3	0.7
										1	0
										1	0
										1	0
										0	1
										0.781	0.219
										1	0
										1	0
										0.809	0.19
										1	0
										0.667	0.333
										1	0
										1	0
										1	0
										0	1
										1	0
										1	0
										1	0
										1	0
										0	1
										0.853	0.147
										0	1
										0.24	0.76
										0.079	0.921
										0.053	0.947
										0	1
										0	1
										1	0
										1	0
										0.44	0.56
										1	0
										1	0
										0.2	0.8
										0.818	0.182
										0.333	0.667
										0.231	0.769
										1	0
										0.435	0.565
										1	0
										1	0
										0.423	0.577
										0.107	0.893
										0.663	0.337
										0.832	0.168
										0.144	0.856
										1	0
										1	0
										1	0
										0	1
										1	0
										0.743	0.257
										0	1
										1	0
										0.3	0.7
										1	0
										0.753	0.247
										0.477	0.524
										1	0
										0.64	0.359
										0.5	0.5
										1	0
										0.633	0.367
										1	0
										0.618	0.382
										1	0
										1	0
										0.417	0.583
										0.44	0.559
										0.663	0.337
										0.396	0.604
										1	0
										0.577	0.423
										0.5	0.5
										1	0
										1	0
										1	0
										1	0
										0	1
										0	1
								0.865	0.135	0.214	0.786
								1	0	0.207	0.793
								1	0	0.525	0.475
								0.857	0.143	0.312	0.688
								1	0	0.3	0.7
								1	0	1	0
								1	0	0.206	0.794
								1	0	0.107	0.893
								1	0	0.162	0.839
								1	0	0.485	0.515
								0.752	0.248	0.109	0.891
								1	0	0	1
								1	0	0	1
								1	0	1	0
								0.683	0.316	1	0
								1	0	0	1
								0.739	0.261
								1	0	0.769	0.231
								1	0	0.463	0.537
								1	0	1	0
								0.149	0.851	1	0
								0.553	0.447	0.289	0.71
								0.866	0.134	0.543	0.457
								0.219	0.781	1	0
								0.22	0.779	1	0
								1	0	1	0
								1	0	0.579	0.421
								0	1	0.548	0.452
								1	0	0	1
								0.481	0.518	1	0
								1	0	1	0
								1	0	0.328	0.672
								1	0	0	1
								1	0	0	1
								1	0
								1	0	0.822	0.178
								1	0	0.667	0.333
								1	0	0	1
								1	0	0.766	0.234
								0.686	0.314	1	0
								1	0	0.288	0.712
								1	0	0.247	0.753
								0.697	0.303	0.134	0.866
								0.407	0.592	0.561	0.439
								1	0	0.624	0.377
								0.903	0.097	1	0
								0	1	0.479	0.521
								1	0	1	0
								1	0	1	0
								0.819	0.181	0.202	0.798
								1	0	1	0
								0.882	0.118	1	0
								1	0	1	0
								0.244	0.756	0.441	0.559
								1	0	0.553	0.447
								1	0	1	0
								0	1	1	0
								1	0	1	0
								1	0	0.322	0.678
								1	0	0	1
								0.483	0.516	0.916	0.084
								1	0	0.6	0.4
								1	0	0.076	0.924
								0.542	0.458	1	0
								0	1	0.095	0.905
								0	1	0.25	0.75
								1	0	0.597	0.404
								0	1	0.985	0.015
								0.169	0.831	1	0
								1	0	0.4	0.6
								0	1	1	0
								0	1	1	0
								1	0	0.148	0.852
								1	0	0.353	0.647
								1	0	1	0
								0.484	0.516	1	0
								1	0	0.39	0.61
								0.718	0.282	1	0
								0.511	0.489
								0.716	0.284	0.566	0.434
								1	0	0.807	0.193
								1	0	1	0
								1	0	0.808	0.191
								0.604	0.396	0.934	0.067
								0.977	0.023	0.306	0.694
								1	0	0.694	0.306
								1	0	1	0
								1	0	0.925	0.075
								0	1	0.361	0.639
								0	1	0.652	0.348
								0.237	0.763	1	0
								0.414	0.586	0.676	0.325
								0.237	0.763	0.532	0.468
								1	0	1	0
								1	0	0.681	0.319
								0.793	0.207	0.414	0.586
								0.876	0.124	0	1
								1	0	0.241	0.759
								0.168	0.832	1	0
								0.143	0.857
								0.086	0.914	0.69	0.31
								0.314	0.686	0.61	0.39
								1	0
								1	0	0.791	0.209
								0.664	0.336	0.293	0.707
								0.319	0.681	0.283	0.718
								1	0	0	1
								0.657	0.343	0	1
								0.867	0.133
								0.335	0.665	0.746	0.254
								0.508	0.492
								0.717	0.283	0.305	0.695
								0.407	0.593
								0.071	0.929	0.603	0.398
								0.561	0.438	0.111	0.889
								0.645	0.354	0.229	0.772
								0	1	0.451	0.549
								0	1	1	0
								1	0	1	0
								1	0	0.778	0.222
								1	0	1	0
								0.768	0.232	1	0
								1	0	1	0
								1	0	0	1
										1	0
								0.356	0.644	1	0
								0.262	0.738	0.307	0.693
								0.651	0.349	0.87	0.13
								1	0	1	0
								1	0	1	0
								0.256	0.743	0	1
								0.829	0.171	0.07	0.93
								0.712	0.288	1	0
								0.256	0.744	0.887	0.113
								1	0	1	0
								0.732	0.268	1	0
								0.567	0.433	1	0
								0.495	0.505	0.315	0.685
								0.241	0.759	1	0
								1	0	1	0
								0.633	0.367	0.635	0.364
								1	0
								1	0	0.635	0.365
								1	0	0.65	0.35
								1	0	1	0
								0.798	0.202	0.676	0.324
								0.786	0.214	0	1
								1	0	0	1
								0.464	0.536	0	1
								0.785	0.214
								0.894	0.106	0.359	0.64
								0.517	0.482	1	0
								0.743	0.257	0.729	0.272
								1	0	0.713	0.287
								1	0	1	0
								1	0	0.704	0.296
								1	0	0.6	0.4
								0	1	0.548	0.452
								0.638	0.362	1	0
								0	1	0.628	0.372
								1	0	0.818	0.182
								1	0	0.583	0.417
								1	0	1	0
								1	0	0.085	0.915
								0.75	0.25	0.879	0.121
										1	0
								0.138	0.862	1	0
								1	0	0.659	0.341
								0.11	0.89	1	0
								1	0	1	0
								0.533	0.467	1	0
								1	0	1	0
								0.924	0.077	0	1
								0.716	0.284	1	0
								1	0	0.443	0.557
								1	0
								0.512	0.488	0.261	0.739
								0.566	0.434	1	0
								0.629	0.371
								1	0
								1	0
								1	0
								1	0
								1	0
								0.866	0.134
								0.317	0.683
								1	0
								0.207	0.793
								0.734	0.266
								1	0
								1	0
								0.431	0.569
								1	0
								1	0
								0.696	0.304
								1	0
								1	0
								1	0
								0.744	0.256
								1	0
								1	0
								0.371	0.629
								1	0
								1	0
								1	0
								1	0
								1	0
								1	0
								0.791	0.209
								0.252	0.748
								0.039	0.961
								0.643	0.357
								1	0
								0.638	0.363
								1	0
								0.132	0.868
								0	1
								1	0
								1	0
								1	0
								1	0
								0.549	0.451
								1	0
								1	0
								1	0
								1	0
								1	0
								1	0
								1	0
								1	0
								0.709	0.292
								1	0
								0.579	0.421
								1	0
								0	1
								1	0
								1	0
								1	0
								1	0
								1	0
								1	0
								1	0
								0	1
								0	1
								0.299	0.701
								1	0
								1	0
								1	0
								1	0
								1	0
								0	1
								0.356	0.644
								0	1
								1	0
								1	0
								0.8	0.2
								1	0
								1	0
								1	0
								1	0
								1	0
								1	0
								1	0
								1	0
								1	0
								0.471	0.529
								0.701	0.299
								0.25	0.75
								1	0
								1	0
								1	0
								1	0
								0.307	0.693
								0.493	0.507
								0.625	0.375
								1	0
								0	1
								0.602	0.398
								1	0
								0.5	0.5
								0.25	0.75
								0	1
								0.315	0.685
								1	0
								0.862	0.138
								0	1
								0	1
								0	1
								0.282	0.718
								0.244	0.756
								0.37	0.63
								0.379	0.621
								0	1
								0	1
								1	0
								0.026	0.974
								1	0
								0	1
								1	0
								0	1
								0.286	0.714
								1	0
								0.081	0.919
								0.896	0.104
								0.671	0.329
								0.292	0.708
								0.373	0.627
								0.857	0.143
								0.147	0.853
								0.417	0.583
								0.421	0.579
								0.393	0.607
								0.126	0.874
								1	0
								0.844	0.156
								0.325	0.674
								0.541	0.459
								0	1
								1	0
								1	0
								0	1
								0.198	0.802
								1	0
								1	0
								0	1
								1	0
								0.664	0.336
								1	0
								1	0
								0.903	0.096
								1	0
								1	0
								1	0
								0.398	0.602
								0.876	0.123
								1	0
								1	0
								1	0
								0.234	0.766
								0.681	0.319
								1	0
								0.737	0.263
								0.231	0.769
								1	0
								1	0
								0.101	0.898
								0.09	0.91
								1	0
								0.046	0.954
								0.379	0.621
								1	0
								1	0
								0.244	0.756
								1	0
								0	1
								0.566	0.434
								0	1
								0	1
								1	0
								1	0
								0	1
								0.35	0.65
								1	0
								1	0
								1	0
								1	0
								1	0
								0.941	0.059
								1	0
								1	0
								1	0
								1	0
								0.971	0.029
								1	0
								1	0
								1	0
								0.196	0.805
								1	0
								0.716	0.284
								0.396	0.603
								0.141	0.859
								1	0
								0.302	0.699
								1	0
								0.538	0.463
								0.585	0.415
								0.552	0.448
								1	0
								1	0
								0	1
								1	0
								1	0
								1	0
								1	0
								1	0
								1	0
								1	0
								1	0
								0	1
								0	1
								0	1
								1	0
								0.587	0.413
								1	0
								1	0
								0	1
								0.839	0.161
								1	0
								1	0
								1	0
								1	0
								0.977	0.023
								0.992	0.008
								0.917	0.083
								0.012	0.988
								0.5	0.5
								1	0
								0.445	0.555
								1	0
								0.357	0.642
								1	0
								1	0
								1	0
								0.366	0.634
								1	0
								1	0
								0.906	0.094
								1	0
								0.281	0.719
								0.866	0.134
								1	0
								0.913	0.087
								0.333	0.667
								1	0
								0.766	0.233
								1	0
								1	0
								1	0
								0.216	0.784
								1	0
								0.43	0.57
								1	0
								1	0
								0	1
								1	0
								1	0
								1	0
								1	0
								0.865	0.134
								1	0
								1	0
								1	0
								1	0
								1	0
								1	0
								0.236	0.764
								1	0
								0	1
								0.368	0.632
								0.38	0.62
								1	0
								0.442	0.558
								1	0
								0	1
								0	1
								1	0
								1	0
								0	1
								0	1
								0	1
								1	0
								0	1
								1	0
								0.786	0.214
								1	0
								1	0
								1	0
								0	1
								0.458	0.542
								0	1
								1	0
								1	0
								0.913	0.087
								1	0
								1	0
								0.593	0.407
								1	0
								1	0
								1	0
								0	1
								0.603	0.397
								1	0
								1	0
								1	0
								1	0
								1	0
								1	0
								0.897	0.103
								0.787	0.213
								0.538	0.462
								0.512	0.489
								1	0
								0.545	0.455
								1	0
								0.243	0.757
								0.883	0.117
								0	1
								0.403	0.597
								0.571	0.429
								1	0
								1	0
								1	0
								0.375	0.626
								1	0
								1	0
								1	0
								1	0
								0.737	0.263
								1	0
								0	1
								1	0
								0.633	0.367
								1	0
								1	0
								1	0
								0	1
								0	1
								0	1
								0	1
								0	1
								0.182	0.818
								1	0
								0	1
								0	1
								1	0
								0.938	0.062
								0	1
								1	0
								0.688	0.311
								1	0
								1	0
								1	0
								0.622	0.378
								1	0
								1	0
								0.542	0.458
								0.625	0.375
								0	1
								0	1
								0.505	0.495
								1	0
								1	0
								1	0
								0	1
								1	0
								1	0
								0.778	0.222
								1	0
								1	0
								1	0
								1	0
								0.929	0.071
								1	0
								1	0
								1	0
								1	0
								1	0
								1	0
								0.407	0.593
								1	0
								1	0
								1	0
								1	0
								0.912	0.087
								1	0
								1	0
								1	0
								0.67	0.33
								1	0
								0.407	0.592
								0.746	0.254
								1	0
								1	0
								1	0
								1	0
								1	0
								0.133	0.867
								0.093	0.906
								0.335	0.665
								1	0
								1	0
								1	0
								1	0
								1	0
								1	0
								1	0
								0	1
								1	0
								1	0
								1	0
								1	0
								0.531	0.468
								0.584	0.416
								0.927	0.073
								1	0
								1	0
								0.767	0.233
								1	0
								1	0
								1	0
								0.697	0.303
								0.042	0.958
								0.102	0.898
								1	0
								0.213	0.787
								0.972	0.029
								1	0
								1	0
								1	0
								0	1
								1	0
								1	0
								1	0
								1	0
								1	0
								1	0
								1	0
								1	0
								1	0
								1	0
								1	0
								0	1
								1	0
								0.204	0.796
								0.366	0.634
								1	0
								1	0
								0.344	0.656
								1	0
								0.972	0.029
								1	0
								0	1
								0.721	0.279
								1	0
								0	1
								0	1
								0.596	0.404
								1	0
								1	0
								1	0
								0.296	0.704
								0	1
								1	0
								1	0
								1	0
								1	0
								0.503	0.497
								1	0
								1	0
								1	0
								0.569	0.431
								0.141	0.859
								0.304	0.696
								0.827	0.173
								0.4	0.6
								1	0
								0.517	0.483
								0.474	0.525
								0.355	0.645
								1	0
								0	1
								0.899	0.102
								1	0
								1	0
								1	0
								1	0
								0.703	0.297
								0.906	0.094
								1	0
								0.772	0.228
								0.626	0.374
								1	0
								1	0
								0.146	0.854
								1	0
								0	1
								0	1
								0.326	0.674
								0.921	0.079
								1	0
								1	0
								0.807	0.194
								1	0
								0.568	0.432
								0.895	0.105
								1	0
								1	0
								0.951	0.049
								0.849	0.151
								1	0
								0.962	0.038
								1	0
								1	0
								1	0
								1	0
								0.814	0.187
								0.885	0.115
								0.209	0.791
								0	1
								0.851	0.149
								0.405	0.595
								1	0
								1	0
								0.903	0.097
								0	1
								1	0
								0.114	0.886
								0	1
								1	0
								1	0
								1	0
								0	1
								1	0
								1	0
								0.776	0.225
								1	0
								1	0
								0.626	0.374
								1	0
								1	0
								1	0
								1	0
								1	0
								0.529	0.471
								0	1
								0	1
								1	0
								1	0
								1	0
								1	0
								0.229	0.771
								0.233	0.767
								0.272	0.728
								1	0
								1	0
								1	0
								0	1
								1	0
								1	0
								1	0
								0	1
								0.065	0.935
								0.041	0.959
								1	0
								0.293	0.707
								0.869	0.13
								0.917	0.083
								1	0
								0.721	0.279
								0.511	0.489
								0.794	0.206
								0	1
								1	0
								1	0
								1	0
								1	0
								0.925	0.075
								1	0
								0.791	0.209
								0.345	0.656
								0.756	0.243
								1	0
								0.771	0.229
								1	0
								0.912	0.087
								1	0
								1	0
								0	1
								1	0
								0	1
								1	0
								0.229	0.771
								0.51	0.49
								0.959	0.041
								0	1
								0	1
								1	0
								1	0
								1	0
								0.116	0.883
								0.83	0.17
								0	1
								0	1
								0	1
								1	0
								0.074	0.926
								1	0
								1	0
								1	0
								1	0

## Sheet: Freq Distribution
Fig 6D		µm / Sec
	WT	0.5	11.4286	9.95025		0	22.4138	19.3548	25	14.6739	12.1951	14.6465	14.6919	15.7895		16.6667	28.3582	17.0732	22.3881	18.1818	22.5	20.9524	34.7826	17.5926	30	37.5	22.807	14.2857	28.3784	31.8841	14.6465		17.2932	20.2532		0	22.2222	25	26.087	22.3529	27.8481	16.3934	18.75	11.5385		8.33333	14.2857	35.5556	31.25
		1	13.1429	17.4129		100	15.5172	29.0323	17.3077	14.1304	12.1951	9.59596	10.9005	10.5263		16.6667	20.8955	26.0163	26.8657	16.6667	31.25	19.0476	15.2174	15.7407	32.5	31.25	28.0702	15.1261	22.2973	24.6377	19.1919		17.2932	10.1266		0	11.1111	31.25	32.6087	15.2941	13.9241	9.83607	12.5	19.2308		16.6667	30.3571	16.6667	19.7917
		1.5	14.2857	20.398		0	15.5172	32.2581	22.1154	25	18.6992	15.6566	17.0616	26.3158		16.6667	16.4179	25.2033	19.403	23.4848	21.25	23.8095	19.5652	20.3704	20	12.5	22.807	15.1261	18.9189	17.3913	19.1919		12.782	22.7848		100	11.1111	25	20.6522	24.7059	15.1899	16.3934	20.5357	34.6154		33.3333	21.4286	17.7778	18.75
		2	21.1429	17.4129		0	20.6897	9.67742	21.1538	24.4565	25.2033	19.1919	24.6445	26.3158		33.3333	16.4179	14.6341	10.4478	13.6364	10	11.4286	23.913	14.8148	7.5	6.25	8.77193	16.8067	13.5135	11.5942	17.1717		21.8045	15.1899		0	38.8889	12.5	11.9565	12.9412	20.2532	15.5738	27.6786	23.0769		16.6667	8.92857	8.88889	12.5
		2.5	17.1429	14.9254		0	15.5172	3.22581	7.69231	13.0435	18.6992	17.1717	17.5355	5.26316		0	7.46269	8.94309	8.95522	14.3939	5	12.381	4.34783	5.55556	2.5	12.5	7.01754	14.2857	8.78378	2.89855	12.6263		12.782	18.9873		0	11.1111	6.25	8.69565	9.41176	10.1266	16.3934	9.82143	3.84615		8.33333	12.5	6.66667	4.16667
		3	8	8.45771		0	3.44828	0	4.80769	3.80435	6.50407	11.6162	9.47867	10.5263		8.33333	2.98507	4.06504	8.95522	4.54545	6.25	6.66667	0	13.8889	7.5	0	5.26316	10.9244	2.7027	4.34783	11.1111		9.02256	5.06329		0	2.77778	0	0	9.41176	8.86076	13.9344	7.14286	3.84615		8.33333	5.35714	5.55556	6.25
		3.5	12	8.45771		0	1.72414	3.22581	1.92308	4.34783	4.87805	9.59596	3.79147	0		0	1.49254	1.62602	1.49254	5.30303	0	3.80952	0	6.48148	0	0	3.50877	7.56303	3.37838	1.44928	3.0303		4.51128	5.06329		0	0	0	0	4.70588	3.79747	7.37705	2.67857	3.84615		8.33333	3.57143	5.55556	1.04167
		4	1.71429	2.48756		0	1.72414	3.22581	0	0	0.813008	1.51515	0	5.26316		0	2.98507	0	0	0.757576	1.25	0	0	4.62963	0	0	0	4.20168	0	0	2.0202		3.00752	1.26582		0	2.77778	0	0	1.17647	0	1.63934	0.892857	0		0	1.78571	0	1.04167
		µm / Sec	AA
	AA	0.5	20	42.8571	50		15.2174	20.1923	6.25	6.66667	15.1261	63.3333	19.3939	57.7778		30.6122		33.3333	12.5	23.8938	33.3333	29.2683	25	21.4286	100	75	30.7692	50	40.9091	100		20	50	0		26.087	21.5385	45.4545	19.0476	16.2651	45	30.2326	49.0566	75	40		14.2857	30.7692	25
		1	8	28.5714	25		39.1304	16.3462	12.5	26.6667	15.5462	33.3333	29.697	26.6667		30.6122		14.2857	31.25	24.7788	50	19.5122	50	42.8571	0	25	11.5385	16.6667	18.1818	0		46.6667	0	50		26.087	26.1538	36.3636	23.8095	10.241	35	31.3953	35.8491	25	50		28.5714	38.4615	37.5
		1.5	32	14.2857	0		32.6087	17.3077	18.75	6.66667	21.0084	3.33333	25.4545	13.3333		34.6939		19.0476	28.125	23.0088	16.6667	17.0732	25	14.2857	0	0	30.7692	33.3333	16.6667	0		20	50	50		32.6087	23.8462	9.09091	28.5714	21.6867	20	18.6047	9.43396	0	10		14.2857	7.69231	27.0833
		2	20	14.2857	25		8.69565	14.4231	18.75	40	23.5294	0	12.7273	2.22222		0		19.0476	12.5	14.1593	0	14.6341	0	14.2857	0	0	17.3077	0	10.6061	0		6.66667	0	0		10.8696	12.3077	9.09091	19.0476	26.506	0	11.6279	3.77358	0	0		28.5714	23.0769	8.33333
		2.5	12	0	0		4.34783	20.1923	25	13.3333	13.8655	0	8.48485	0		2.04082		4.7619	6.25	6.19469	0	9.7561	0	0	0	0	3.84615	0	4.54545	0		0	0	0		4.34783	11.5385	0	4.7619	14.4578	0	5.81395	1.88679	0	0		0	0	0
		3	8	0	0		0	10.5769	12.5	0	5.46218	0	2.42424	0		2.04082		4.7619	3.125	6.19469	0	0	0	7.14286	0	0	3.84615	0	0	0		6.66667	0	0		0	3.07692	0	4.7619	10.241	0	0	0	0	0		7.14286	0	2.08333
		3.5	0	0	0		0	0.961538	6.25	0	3.36134	0	1.81818	0		0		4.7619	3.125	0.884956	0	2.43902	0	0	0	0	0	0	4.54545	0		0	0	0		0	0.769231	0	0	0	0	0	0	0	0		0	0	0
		4	0	0	0		0	0	0	6.66667	1.68067	0	0	0		0		0	0	0	0	0	0	0	0	0	1.92308	0	0	0		0	0	0		0	0	0	0	0	0	2.32558	0	0	0		7.14286	0	0
[truncated: 12 more columns]

## Sheet: Immuno
Fig 6E	WT, 45'	WT, 60'	WT, LTP, 45'	WT, LTP, 60'	AA, 45'	AA, 60'	AA, LTP, 45'	AA, LTP, 60'
	59.1	63.25	106.74	139.28	64.95	84.25	49.69	28.66
	40.09	142.67	96.84	170.63	55.17	93.61	35.48	39.45
	80.03	81.95	125.56	65.24	68.05	46.32	54.75	18.53
	62.27	161.7	145.78	292.8	46.63	54.69	67.11	31.54
	74.21	46.76	109.43	176.29	45.72	35.85	63.18	49.64
	77.35	90.8	140.83	110.98	37.86	42.79	48.55	81.03
	66.35	111.34	208.65	138.7	42.89	17.1	34.57	15.96
	141.05	135.55	105.99	146.87	30.23	41.29	46.59	50.92
	131.98	93.95	131.42	112.62	24.9	27.36	49.95	22.4
	103.95	79.48	160.17	110.62	43.87	58.85	121.9	64.75
	165.61	78.2	107.65		39.67	20.39	76.14	90.27
	91.52	97.17			38.65	130.64	51.16	24.91
	206.5	117.17				51.69	40.51	43.47
						23.61	29.32
						32.29	65.29
	125.53	144.13	65.12	116.17	71.05	39.09	42.04	41.39
	99.92	56.58	80.53	92.2	70.03	29.68	30.57	48.16
	91.12	37.96	220.54	111.64	67.5	39.31	91.8	48.33
	38.15	63.06	139.33	162.77	79.17	28.33	86.99	81.74
	83.15	44.54	70.71	127.84	22.4	45.71	58.56	43.26
	109.05	128.97	123.15	146.8	52.87	34.34	60.46	79.25
	110.37	101.92	182.39	75.84	122.71	47.62	33.92	17.81
	25.27	90.48	204.55	207.11	28.77	47.38	76.83	19.65
	180.88	141.14	80.19	91.87	47.04	28.29	61.43	14.32
	169.17	64.63	266.02	73.5	49.42	12.6	91.8	26.34
	65.41	178.02	175.44	89.14	49.96	30.78	99.97	28.79
	113.57	93.26	96.71	201.67	71.05	40.46	132.43	42.76
	110.95	155.31	126.74	126.71	47.77	30.33	76.59	55.38
	77.46		187.2		69.06	22.26	54.33	44.69
			175.97				71.54	26.97
	59.4	158.84	104.59	115.4	55.79	118.02	101.47	43.28
	107.53	190.83	144.98	111	81.01	95.27	51.94	107.76
	90.11	65.66	157.93	228.9	58.48	141.61	29.55	86.63
	90.3	52.74	148.15	133.59	61.71	54.24	77.83	48.09
	146.9	114.34	125.68	95.21	27.68	29.65	28.5	26.28
	39.85	90.69	162.93	88.63	131.31	41.79	24.31	114.46
	86.78	48.18	116.63	121.39	49.24	17.29	33.65	29.49
	33.16	62.63	174.63	112.19	65.12	30.99	91.45	51.99
	197.44	130.75	214.34	105.57	46.5	38.51	20.84	48.71
	123.61	48.31	113.4	133.25	52.42	116.96	86.11	43.53
	66.52	60.82	153.83	195.2	42.89	45.9	89	36.64
	98.58	47.25	160.19	140.05	49.34	15.42	48.66	26.49
	67.77	177.1	224.74	221.35	46.74	21.56	58.87	69.5
	106.18	183.28	37.16	136.43	61.27	17.97	39.66	108.85
	69.55	49.77	157.44	117.12	61.66	51.83	35.14	121.33
	161.87	123.02	80.48	150.38	69.12	49.03	34.17	50.12
	153.64	64.1	150.85	167.8	30.71		83.46	52.55
	100.79	92.81	145.17		34.7		67.53	61.79
		138.9					49.77
