# Supplementary material for: Regulation of different phases of AMPA receptor intracellular transport by 4.1N and SAP97
Source: eLife. 2023 Apr 20;12:e85609. doi: 10.7554/eLife.85609 (PMC10118384; doi:10.7554/eLife.85609)
Supplement: Supplementary file 1. — Values are calculated as a percentage of the corresponding WT GluA1 in the same set of experiments. [file elife-85609-supp1.xlsx]

## Sheet: Feuil1
			Vesicle number	Mean speed	Externalization
			% of WT	% of WT	% of WT
	Basal	D7 / WT	56	88	78
		D4,1N / WT	56	105	69
		AA / WT	100	106	39
	LTP	D7 / WT	66	81	44
		D4,1N / WT	54	89	33
		AA / WT	36	67	37
