# Supplementary material for: Regulation of different phases of AMPA receptor intracellular transport by 4.1N and SAP97
Source: eLife. 2023 Apr 20;12:e85609. doi: 10.7554/eLife.85609 (PMC10118384; doi:10.7554/eLife.85609)
Supplement: Supplementary file 2. [file elife-85609-supp2.xlsx]

## Sheet: Feuil1
Figure	Panel	Statistical test	p value	p value summary	# independent experiments	# cells
1	A	Parametric two-tailed unpaired t-test	Scr. / Sh-4.1N: 0,0011	**	5
			Scr. / Sh-SAP97: 0,0013	**	4
	B	Parametric two-tailed unpaired t-test	Scr. / Sh-4.1N: <0,0001	****	4
			R. / R + Sh-4.1N: 0.3144	ns	4
			Scr. / Sh-SAP97: 0,0208	*	4
			R. / R + Sh-SAP97: 0,8322	ns	4
	C	Parametric two-tailed unpaired t-test	Scr. / Sh-4.1N: 0,0301	*	3	23 to 31
			Scr. / Sh-SAP97: <0,0001	****	4	31 to 37
	E	Parametric two-tailed unpaired t-test	Scr. / Sh-4.1N: 0,0324	*	3	45 to 62
			Scr. / Sh-SAP97: <0,0001	****	4	62 to 73
	F	Parametric two-tailed unpaired t-test	Move: 0,0004	***	3	Scr.: 2433 Sh:1380
			Pause: 0,0004	***	3
	G	Parametric two-tailed unpaired t-test	Move: <0,0001	****	3	Scr.: 3727 Sh:583
			Pause:<0,0001	****	3
	H	Parametric two-tailed unpaired t-test	45': Scr-Sh: <0,0001	****	3	45': 33 to 43
			45': Sh-Res.: 0,0002	***	3
			60': Scr-Sh: <0,0001	****	3	60': 38 to 50
			60': Sh-Res.: <0,0001	****	3
	I	Parametric two-tailed unpaired t-test	45': Scr-Sh: <0,0001	****	3	45': 35 to 49
			45': Sh-Res.: 0,0004	***	3
			60': Scr-Sh: <0,0001	****	3	60': 31 to 60
			60': Sh-Res.: <0,0001	****	3
2	D	Parametric two-tailed unpaired t-test	30': <0,0001	****	2	WT: 84 / D78: 20
			60': <0,0001	****	2	WT: 93 / D78: 34
			90': <0,0001	****	2	WT: 44/ D78: 30
			120': <0,0001	****	2	WT: 85 / D78: 39
	E	Parametric two-tailed unpaired t-test	D7 - 30': 0,28	ns	4	WT: 81 / D7: 29
			D7 - 60': 0,01	**	4	WT: 92 / D7: 42
			D7 - 90': <0,0001	****	4	WT: 43 / D7: 42
			D7 - 120': 0,004	***	4	WT: 83 / D7: 45
			D4,1N - 30': 0,56	ns	4	WT: 81 / D4,1N: 38
			D4,1N - 60': <0,0001	****	4	WT: 93 / D4,1N: 36
			D4,1N - 90': <0,0001	****	4	WT: 43 / D4,1N: 40
			D4,1N - 120': <0,0001	****	4	WT: 83 / D4,1N: 42
	G	Parametric two-tailed unpaired t-test	WT/D78: <0,0001	****	4	28 to 32
	H	Parametric two-tailed unpaired t-test	WT/D4,1N: 0,0031	**	5	39 to 44
			WT/D4,1N:0,1386	ns	5	78 to 88
			Move: 0,064	ns	5	WT: 4211 D4,1N: 1845
			Pause: 0,059	ns
	I	Parametric two-tailed unpaired t-test	WT/D7: 0,0079	**	4	41 to 33
			WT/D7: 0,0013	**	4	82 to 66
			Move: <0,0001	****	4	WT: 2618 D7: 1382
			Pause: <0,0001	****	4
3	C	Parametric two-tailed unpaired t-test	WT / AA: 0.978	ns	6	WT: 43; AA: 31
			WT/ DD: 0,428	ns	6	WT: 43; DD: 29
		Parametric two-tailed unpaired t-test	WT / AA: 0.173	ns	6	WT: 86; AA: 62
			WT / DD: 0.002	**	6	WT: 86; DD: 58
		Parametric two-tailed unpaired t-test	Move WT / AA: 0,490	ns	6	WT: 2465; AA: 1723
			Pause WT / AA: 0.490	ns
			Move WT / DD: 0.515	ns	5	WT: 2465; DD: 2059
			Pause WT / DD: 0.515	ns
	F	Parametric two-tailed unpaired t-test	45': WT-WT LTP: <0,0001	****	3	WT: 45; WT LTP: 44
			45': AA-AA LTP: 0,275	ns	3	AA: 44; AA LTP: 49
			45': DD- DD LTP: 0,338	ns	3	DD: 49; DD LTP: 41
			60': WT-WT LTP: 0,0004	***	3	WT: 45; WT LTP: 40
			60': AA-AA LTP: 0,628	ns	3	AA: 45; AA LTP: 46
			60': DD- DD LTP: 0,511	ns	3	DD: 48; DD LTP: 49
4	B	Parametric two-tailed unpaired t-test	Scr. / Sh-SAP97: <0,0001	****	3	Scr.: 30, Sh: 21
			WT/ D7: 0,0316	*	3	WT: 18 / D7: 38
		Parametric two-tailed unpaired t-test	Scr. / Sh-SAP97: 0,0187	*	3	Scr.: 60, Sh: 42
			WT/ D7: 0,0008	***	3	WT: 36, D7: 72
		Parametric two-tailed unpaired t-test	Move Scr. / Sh-SAP97: <0,0001	****	3	Scr.: 3716 Sh:863
			Pause Scr. / Sh-SAP97: <0,0001	****
			Move WT / D7: <0,0001	****	3	WT: 1849 D7: 2593
			Pause WT / D7: <0,0001	****
	D	Parametric two-tailed unpaired t-test	45': WT-WT LTP: <0,0001	****	3	WT: 55; WT LTP: 53
			45': D7- D7 LTP: 0,33	ns	3	D7: 48; D7 LTP: 53
			60': WT-WT LTP: 0,0006	***	3	WT: 59; WT LTP: 56
			60': D7- D7 LTP: 0,60	ns	3	D7: 54; D7 LTP: 55
5	B	Parametric two-tailed unpaired t-test	Scr. / Sh-4.1N: 0,0074	**	3	Scr.: 34, Sh: 26
			WT/ D4.1N: 0,0004	***	3	WT: 30 / D4.1N: 40
		Parametric two-tailed unpaired t-test	Scr. / Sh-4.1N: 0,0344	*	3	Scr.: 68, Sh: 46
			WT/ D4.1N: 0,0041	**	3	WT: 60, D4.1N: 80
		Parametric two-tailed unpaired t-test	Move Scr. / Sh-4.1N: 0,021	*	3	Scr.: 4777 Sh:2755
			Pause Scr. / Sh-4.1N: 0,021	*
			Move WT / D4.1N: <0,0001	****	3	WT: 3911 D4.1N: 2803
			Pause WT / D4.1N: <0,0001	****
	D	Parametric two-tailed unpaired t-test	45': WT-WT LTP: <0,0001	****	3	WT: 45; WT LTP: 44
			45': D4.1N- D4.1NLTP: 0,205	ns	3	D4.1N: 47; D4.1N LTP: 45
			60': WT-WT LTP: 0,0004	***	3	WT: 45; WT LTP: 40
			60': D4.1N- D4.1N LTP: 0,6383	ns	3	D4.1N: 47; D4.1N LTP: 49
6	A	Parametric two-tailed unpaired t-test	Pre / Post: 0,0046	**	3	Pre: 7; Post: 22
	B	Parametric two-tailed unpaired t-test	WT / AA: <0,0001	****	3	WT: 22; AA: 26
		Parametric two-tailed unpaired t-test	WT / AA:<0,0001	***	3	WT: 46; AA: 51
		Parametric two-tailed unpaired t-test	Move WT / AA: 0,012	*	3	WT: 1461; AA: 582
			Pause WT / AA: 0.012	*
	C	Parametric two-tailed unpaired t-test	p = 0,0001 (0.5 µm / sec)	***	6	WT: 21; AA: 21
			p = 0,042 (1 µm / sec)	*
			p = 0,249 (1.5 µm / sec)	ns
			p = 0,006 (2 µm / sec)	**
			p = <0,0001 (2.5 µm / sec)	****
			p = <0,0001 (3 µm / sec)	****
			p = <0,0001 (3.5 µm / sec)	****
			p = 0.147 (4 µm / sec)	ns
	E	Parametric two-tailed unpaired t-test	45': WT-WT LTP: <0,0001	****	3	WT: 45; WT LTP: 44
			45': AA-AA LTP: 0,275	ns	3	AA: 44; AA LTP: 49
			60': WT-WT LTP: 0,0004	***	3	WT: 45; WT LTP: 40
			60': AA-AA LTP: 0,628	ns	3	AA: 45; AA LTP: 46
